# Supplementary material for: Use of Genomic DNA as an Indirect Reference for Identifying Gender-Associated Transcripts in Morphologically Identical, but Chromosomally Distinct, Schistosoma mansoni Cercariae
Source: PLoS Negl Trop Dis. 2008 Oct 22;2(10):e323. doi: 10.1371/journal.pntd.0000323 (PMC2565838; doi:10.1371/journal.pntd.0000323)
Supplement: Dataset S2 — Worksheets provide details of the differentially expressed transcripts identified in this study. Column A indicates unique identifier for each 50-mer sequence on DNA microarray (sequence available at SchistoGeneDB [22]). Columns B-P represent best BLASTx matches of parent sequence (including names and E values). Where cell is empty, no hit was found upon BLASTx analysis. Columns Q-S (where present) represent Gene Ontology classification categories as determined by Goblet [31]. Worksheet 156 female dual provides details of the differentially expressed female transcripts identified by both DNA microarray hybridization methods (156 transcripts, Figure 3). Worksheet 244 female direct provides details of the differentially expressed female transcripts identified by direct comparison of female cDNA to male cDNA (244 transcripts, Figure 3). Worksheet 192 male direct provides details of differentially expressed male transcripts identified by direct comparison of male cDNA to female cDNA (192 transcripts, Figure 3). Worksheet 188 male dual provides details of differentially expressed male transcripts identified by both DNA microarray hybridization methods (188 transcripts, Figure 3). Worksheet 2304 all indirect provides details of the differentially expressed male and female transcripts identified by indirect comparison of cDNA to the common gDNA reference (2304 transcripts, Figure 3). Transcripts coloured blue represent the male transcripts (1277 transcripts, Figure 3) and transcripts coloured yellow represent the female transcripts (1027 transcripts, Figure 3). (1.09 MB XLS) [file pntd.0000323.s002.xls]

## Sheet: 156 female dual
																	GoBLET Identifiers
Common	hit1id_lrge	hit1name_lrge	hit1evalue	hit2id	hit2name	hit2evalue	hit3id	hit3name	hit3evalue	hit4id	hit4name	hit4evalue	hit5id	hit5name	hit5evalue	Cellular Component	Molecular Function	Biological Process
Contig4986		UNKNOWN 2858	OM0023363-AOP	hypothetical	hypothetical
Contig7026		UNKNOWN 4433	OM0023379-AOP	hypothetical	hypothetical
Contig751		UNKNOWN 419	OM0023383-AOP	hypothetical	hypothetical
SMLIBREPF		S.MANSONI LIBERIAN STRAIN REPETITIVE DNA	OM0023338-AOP
SMW2REPM		S.MANSONI MALE W2 REPETITIVE SEQUENCE, CLONE PUC18-37	OM0023337-AOP														binding GO:0005488	physiological process GO:0007582, cellular process GO:0009987
SMLIBREPM		S.MANSONI LIBERIAN STRAIN REPETIVE DNA	OM0023338-AOP
SCMFSP		S.MANSONI FEMALE SPECIFIC POLYPEPTIDE MRNA M15464.1	OM0023376-AOP
AF521087.1		SCHISTOSOMA MANSONI CLONE P25D5 UNKNOWN MRNA	OM0023389-AOP
AF510338.1		SCHISTOSOMA MANSONI ELASTASE 2A (CE-2A) GENE, PARTIAL CDS	OM0023389-AOP
CD067362	Q5C2L6_SCHJA	SJCHGC08472 protein (Fragment)	9.00E-17	Q6NTJ3_XENLA	MGC83260 protein (Greatwall kinase)	1.00E-09	Q3MIA9_MOUSE	Microtubule associated serine/threonine kinase-like	3.00E-09	MASTL_MOUSE	Microtubule-associated serine/threonine-protein kinase-like (EC 2.7.1.37)	3.00E-09	Q6DBX4_BRARE	Zgc:100990	9.00E-09		catalytic activity GO:0003824, binding GO:0005488	physiological process GO:0007582, cellular process GO:0009987
CD069682	Q5D9Z7_SCHJA	SJCHGC03074 protein	0.9	DAPD_BUCAP	2,3,4,5-tetrahydropyridine-2,6-dicarboxylate N-succinyltransferase (EC 2.3.1.117	7.6	Q4I950_GIBZE	Hypothetical protein	9.9
CD086857	Q2ZGF2_CALSA	Hypothetical protein	0.14	Q2ZIY1_CALSA	Hypothetical protein precursor	0.18	Q3WBB4_9ACTO	Hypothetical protein	0.31	Q9MD97_OENHO	Hypothetical protein rps12	0.69	Q9YAL6_AERPE	Hypothetical protein APE1926	0.69
CD087777
CD088275	Q4QA50_LEIMA	Hypothetical protein	0.048	Q4YFP1_PLABE	Hypothetical protein (Fragment)	0.53	Q9PH93_XYLFA	Hypothetical protein	0.91	Q6ESN4_ORYSA	Hypothetical protein OJ1104_G11.10	1.2	Q4QJ03_LEIMA	Hypothetical protein	1.2
CD088220	Q9RXQ4_DEIRA	Hypothetical protein DR0254	1.00E-04	Q9RS75_DEIRA	Hypothetical protein DR2252	0.003	Q3BKI0_9PROT	Hypothetical protein	0.007	Q423D4_DESHA	Hypothetical protein	0.41	Q428B8_DESHA	Hypothetical protein	0.69
CD089866	Q4XCU9_PLACH	Hypothetical protein (Fragment)	6.00E-08	Q4XH53_PLACH	Hypothetical protein	2.00E-06	Q4RE65_TETNG	Chromosome 2 SCAF15135, whole genome shotgun sequence. (Fragment)	9.00E-06	Q5DDE6_SCHJA	SJCHGC06985 protein	9.00E-04	Q62098_MOUSE	Mus musculus ORFs (putative primordial protein), complete cds	0.002
CD091238	Q4Z052_PLABE	Hypothetical protein (Fragment)	5.9
CD116142	Q8DF29_VIBVU	Hypothetical protein	5.2
CD130164
CD149360	Q4Y5C1_PLACH	Hypothetical protein (Fragment)	7.5	Q55BE8_DICDI	Hypothetical protein	7.5
CD189186	Q7RH19_PLAYO	Hypothetical protein	0.91	Q32P29_HUMAN	WW domain-containing binding protein 4	3.5	WBP4_HUMAN	WW domain-binding protein 4 (WBP-4) (Formin-binding protein 21)	3.5	Q9NY09_HUMAN	Mucin 4 (MUC4)	7.7	Q9UP82_HUMAN	Mucin 4 (Fragment)	7.7
CONTIG11025	Q4QQF9_SCHMA	Gag protein (Fragment)	e-100	Q9BM81_CLOSI	Gag-pol polyprotein	3.00E-32	Q9BM79_CLOSI	Gag-pol polyprotein	5.00E-32	Q9BM80_CLOSI	Gag-pol polyprotein	3.00E-30	Q7PCR6_ANOGA	ENSANGP00000017444 (ENSANGP00000018521) (Fragment)	3.00E-24		catalytic activity GO:0003824, binding GO:0005488	physiological process GO:0007582, cellular process GO:0009987
CONTIG3329	Q80934_HPV55	Transforming protein E6	5.8	Q31DH7_PROMA	Hypothetical protein	9.9
CONTIG3498	Q5BR20_SCHJA	SJCHGC09721 protein	0.23	Q8CMU7_STAES	Streptococcal hemagglutinin protein	3.3	Q5M6S9_CAMJE	Putative sugar transferase	4.3	Q9VV09_DROME	CG4950-PA	9.6	Q75DI2_ASHGO	ABR043Wp	9.6
CONTIG3475
CONTIG3562	Q3BKI1_9PROT	Hypothetical protein	6.00E-27	Q8CM40_VIBVU	Hypothetical protein	9.00E-21	Q8CM43_VIBVU	Hypothetical protein	2.00E-20	Q57T06_SALCH	Hypothetical protein	4.00E-18	Q57J74_SALCH	Hypothetical protein	4.00E-18
CONTIG3550	TAR1_YEAST	Protein TAR1 (Transcript antisense to ribosomal RNA protein 1)	0.062	TAR1_KLULA	Protein TAR1	0.062	Q3XDT2_MOOTH	Hypothetical protein	0.69	Q3KTL6_SCHJA	SJCHGC01393 protein	1.5	Q34X75_9GAMM	TRNA nucleotidyl transferase	4.5
CONTIG3534	Q6BP92_DEBHA	Similar to CA5073|IPF3603 Candida albicans IPF3603 unknown function	7.6
CONTIG4473
CONTIG4963	Q6PYV0_SCHJA	Egg protein CP422	0.65	Q5DFZ7_SCHJA	Hypothetical protein	0.65	Q4JL30_SCHJA	Hypothetical protein	0.65	INSR_DROME	Insulin-like receptor precursor (EC 2.7.1.112) (DIR) (DInr) (dIRH) [Contains: In	5.5	Q6ZNW8_HUMAN	Hypothetical protein FLJ26989	7.2
CONTIG5162	Q54CK3_DICDI	Hypothetical protein	5.8	Q8IDJ5_PLAF7	Hypothetical protein PF13_0264	5.8	Q4VA21_MOUSE	F-box and leucine-rich repeat protein 2 (0 day neonate cerebellum cDNA, RIKEN fu	7.6	Q3TQM5_MOUSE	Adult male corpora quadrigemina cDNA, RIKEN full-length enriched library, clone:	7.6	FBXL2_MOUSE	F-box/LRR-repeat protein 2 (F-box and leucine-rich repeat protein 2)	7.6
CONTIG5329
CONTIG5514
CONTIG5730	Q8IS64_LOCMI	Endothelin-converting enzyme	2.00E-21	Q3U495_MOUSE	NOD-derived CD11c +ve dendritic cells cDNA, RIKEN full-length enriched library,	5.00E-18	Q9QZV7_MOUSE	Soluble secreted endopeptidase	5.00E-18	Q9QZV6_MOUSE	Soluble secreted endopeptidase delta	5.00E-18	Q9JLI3_MOUSE	Neprilysin-like metallopeptidase 1 (Neprilysin-like peptidase beta)	5.00E-18	cell GO:0005623	catalytic activity GO:0003824	physiological process GO:0007582,cellular process GO:0009987
CONTIG6737	Q6AXU2_RAT	Zona pellucida binding protein	0.016	Q4QQE9_SCHMA	Endonuclease-reverse transcriptase	0.082	Q5NC50_MOUSE	Zona pellucida binding protein	0.18	ZPBP1_MOUSE	Zona pellucida-binding protein 1 precursor (Sp38)	0.18	Q5DAV3_SCHJA	Hypothetical protein	0.9
CONTIG7586	Q6PYW4_SCHJA	Egg protein CP111	7.8
CONTIG7816
Contig3099		UNKNOWN 1833 POSSIBLE ANTISENSE	OM0023336-AOP
CONTIG8899	Q8QHL9_XENLA	Type XVIII collagen alpha1 chain	0.1	Q5TSU5_ANOGA	ENSANGP00000028189 (Fragment)	0.23	Q4RVG0_TETNG	Chromosome 15 SCAF14992, whole genome shotgun sequence. (Fragment)	0.3	Q22393_CAEEL	Hypothetical protein col-157	0.3	Q20805_CAEEL	Hypothetical protein col-154	0.3
CONTIG8855
>CL1020	Q8T5G5_SCHJA	Polyprotein	0.004	Q8MWP9_SCHJA	Polyprotein (Fragment)	0.004	Q5BT13_SCHJA	SJCHGC03000 protein (Fragment)	0.006	Q5BSG6_SCHJA	SJCHGC04354 protein (Fragment)	0.011	Q5BSC9_SCHJA	SJCHGC05010 protein (Fragment)	0.011
SCMSLRNA		S.MANSONI SPLICED LEADER RNA GENE	OM0023390-AOP
AI764851	Q7S024_NEUCR	Hypothetical protein	7.5
AI975516	Q660S5_BORGA	Methyl-accepting chemotaxis protein	1.4	Q6DCN1_XENLA	MGC81027 protein	7	Q6DDH3_XENLA	MGC83946 protein	9.1
CD063659	Q5SZG8_HUMAN	Laminin, alpha 4	1.1	Q5D044_HUMAN	LAMA4 protein	1.1	Q4LE44_HUMAN	LAMA4 variant protein (Fragment)	1.1	LAMA4_HUMAN	Laminin alpha-4 chain precursor	1.1	Q8BSJ0_MOUSE	12 days embryo male wolffian duct includes surrounding region cDNA, RIKEN full-l	3.2
CD063643	Q5C1B3_SCHJA	SJCHGC03716 protein (Fragment)	1.2	Q59MN6_CANAL	Hypothetical protein	2	Q9V8T3_DROME	CG9811-PA	5.9	Q6NR39_DROME	RE48016p	5.9
CD077118	Q4Y318_PLACH	Hypothetical protein (Fragment)	2	Q7REA9_PLAYO	DNA-directed RNA polymerase beta chain (Fragment)	3.4	Q9SAJ4_ARATH	Hypothetical protein At1g79550; T8K14.3 (Cytosolic phosphoglycerate kinase) (Put	4.4	Q8LFV7_ARATH	Phosphoglycerate kinase, putative	4.4	Q4WDJ7_ASPFU	Amino acid transporter, putative	5.7
CD087277	Q5ZRH0_LEGPH	Hypothetical protein	2.6	Q5UQU7_MIMIV	Hypothetical protein	4.5	Q5WSP7_LEGPL	Hypothetical protein	4.5	Q7Q1V9_ANOGA	ENSANGP00000004609 (Fragment)	4.5
CD088415	Q8FUV1_BRUSU	Hypothetical protein	0.01	Q3BKI6_9PROT	Hypothetical protein	0.062	Q4NP19_9DELT	Hypothetical protein	0.18	Q3FY30_9DELT	Hypothetical protein	0.52	Q2ZLB7_SHEPU	Hypothetical protein	0.89
CD089879	Q7RN86_PLAYO	Hypothetical protein	2.6	Q86H32_DICDI	Hypothetical protein	3.4	Q6M9W0_PARUW	Hypothetical protein	4.4	Q54KK9_DICDI	Hypothetical protein	9.9	Q26109_PLARE	STARP antigen precursor	9.9
CD112777	Q4B3L5_9BURK	Type IV pilus assembly protein PilM	0.003	Q3XCP9_METFL	Type IV pilus assembly protein PilM	0.047	Q47JL2_DECAR	Type IV pilus assembly protein PilM precursor	0.52	Q7NZT8_CHRVO	Type 4 fimbrial biogenesis protein PilM	0.68	Q63LK8_BURPS	Putative polyketide synthase	0.89
CD131664
CD141199	Q5BT13_SCHJA	SJCHGC03000 protein (Fragment)	0.14	Q8T5G5_SCHJA	Polyprotein	0.68	Q8MWP9_SCHJA	Polyprotein (Fragment)	0.68	Q5BSC9_SCHJA	SJCHGC05010 protein (Fragment)	1.5	Q8MWP8_SCHJA	Polyprotein (Fragment)	4.4
CD140788	Q5BYB3_SCHJA	SJCHGC07381 protein (Fragment)	5.00E-21	Q32NM8_XENLA	Hypothetical protein	2.00E-18	Q4SMD2_TETNG	Chromosome 3 SCAF14553, whole genome shotgun sequence. (Fragment)	2.00E-18	Q98SE2_CHICK	U2snRNP auxiliary factor small subunit	5.00E-18	Q564E4_MOUSE	2 days neonate thymus thymic cells cDNA, RIKEN full-length enriched library, clo	5.00E-18	cell GO:0005623, organelle GO:0043226	binding GO:0005488
CD154087
CD161073	Q54TT8_DICDI	Hypothetical protein	1.5	Q6UNF4_ICTPU	CD45	5.8	Q54HM9_DICDI	Hypothetical protein	5.8	Q4I733_GIBZE	Hypothetical protein	5.8	Q5BH35_EMENI	Hypothetical protein	7.6
CONTIG10772	Q6IFU2_SCHMA	Pol polyprotein	1.00E-32	Q5BTC6_SCHJA	SJCHGC02003 protein (Fragment)	4.00E-10	Q5BTC0_SCHJA	SJCHGC02046 protein (Fragment)	1.00E-08	Q5BTC7_SCHJA	SJCHGC02001 protein	7.00E-07	Q4QQE0_SCHMA	Endonuclease-reverse transcriptase	0.014		catalytic activity GO:0003824, binding GO:0005488	physiological process GO:0007582, cellular process GO:0009987
CONTIG3744	Q5BXY9_SCHJA	SJCHGC03880 protein (Fragment)	1.00E-12	Q4T3E7_TETNG	Chromosome 18 SCAF10091, whole genome shotgun sequence. (Fragment)	9.00E-08	Q7ZTG7_OREAU	Vitellogenin receptor (LDL-repeat containing receptor)	1.00E-06	Q6KDZ1_CHICK	Basement membrane-specific heparan sulfate proteoglycan core protein precursor	1.00E-06	Q4RJ58_TETNG	Chromosome 1 SCAF15039, whole genome shotgun sequence	1.00E-06
CONTIG4231	Q5DHF8_SCHJA	SJCHGC01198 protein	4.00E-70	Q4S9G0_TETNG	Chromosome undetermined SCAF14697, whole genome shotgun sequence (Chromosome und	5.00E-70	Q6PI79_XENLA	MGC52708 protein (MGC78769 protein) (H3f3b-prov protein) (H3f3a-prov protein) (M	5.00E-70	Q6PI20_BRARE	Similar to Histone H3.3B (Hypothetical protein zgc:110292) (H3f3a protein) (Hypo	5.00E-70	Q6P823_XENTR	Hypothetical protein MGC75998 (MGC89877 protein)	5.00E-70	cell GO:0005623, organelle GO:0043226, protein complex GO:0000786	binding GO:0005488	physiological process GO:0007582, cellular process GO:0009987
CONTIG5802	Q2ZT18_SHEPU	Hypothetical protein	7.7
CONTIG5844	Q4QQD9_SCHMA	Reverse transcriptase (Fragment)	2.00E-09	Q53GZ4_HUMAN	Leucine rich repeat containing 5 variant (Fragment)	2	Q659A9_HUMAN	Hypothetical protein DKFZp547I0910 (Fragment)	2	Q658W7_HUMAN	Hypothetical protein DKFZp666L2010 (Fragment)	2	LRRC5_HUMAN	Leucine-rich repeat-containing protein 5 precursor	2
CONTIG6242	Q8TMX4_METAC	WD40-repeat containing protein	5.00E-06	Q468D0_METBA	WD40-repeat containing protein	1.00E-04	GSHR_SCHPO	Glutathione reductase (EC 1.8.1.7) (GR) (GRase)	0.07	Q70KE8_MICEC	Putative WD-repeat-containing protein	0.16	Q6QVT1_MICEC	GntN	0.16
SMLA27E06	Q4QQE8_SCHMA	Endonuclease-reverse transcriptase	8.00E-07	Q5C0M3_SCHJA	SJCHGC02939 protein (Fragment)	0.015	Q5DEY9_SCHJA	SJCHGC02887 protein	0.13	Q30KX0_SCHMA	Reverse transcriptase SR3-left (Fragment)	0.37	Q30KW9_SCHMA	Reverse transcriptase SR3-right (Fragment)	0.37
SMLC41B02	Q4UBB7_THEAN	Hypothetical protein	5.2	Q5UR07_MIMIV	Hypothetical protein	8.8
Contig3581		UNKNOWN 2253	OM0023361-AOP
>CL814	Q8ETH8_OCEIH	Hypothetical conserved protein	0.75	Q5B872_EMENI	Hypothetical protein	2.2	Q5AB24_CANAL	Hypothetical protein	4.9	Q5AAT5_CANAL	Hypothetical protein	4.9	O59108_PYRHO	Hypothetical protein PH1438	4.9
Contig4378		UNKNOWN 2775	OM0023355-AOP
Contig827		UNKNOWN 464	OM0023377-AOP
SCMRPTAA		S.MANSONI TANDEM REPEAT UNITS	OM0023390-AOP
SMHP1ELAS		S.MANSONI ELASTASE HP1 GENE	OM0023338-AOP														catalytic activity GO:0003824	physiological process GO:0007582, cellular process GO:0009987
AF527011.1		SCHISTOSOMA MANSONI EGG SECRETED PROTEIN ESP3-6 (ESP3-6) MRNA, COMPLETE CDS	OM0023389-AOP
AI381053	Q6QI92_RAT	LRRG00116	1.00E-38	Q91Z89_MOUSE	PORF2	2.00E-38	Q91Z88_MOUSE	PORF2	2.00E-38	Q61785_MOUSE	ORF2; 5' end undetermined. (Fragment)	2.00E-38	Q7R7I4_PLAYO	Hypothetical protein (Fragment)	2.00E-38		catalytic activity GO:0003824, binding GO:0005488	physiological process GO:0007582, cellular process GO:0009987
AI381050
CD060968	Q4QQE8_SCHMA	Endonuclease-reverse transcriptase	8.00E-06	Q5D9Z7_SCHJA	SJCHGC03074 protein	0.13	Q5BSV8_SCHJA	SJCHGC03153 protein	0.63
CD063908	Q48A31_COLP3	Hypothetical protein	7.7
CD065387
CD066874	Q8N8E0_HUMAN	Hypothetical protein FLJ39621	3	Q4YFP1_PLABE	Hypothetical protein (Fragment)	6.6	Q6ZSA2_HUMAN	Hypothetical protein FLJ45698	6.6
CD072725	Q8YYQ9_ANASP	Alr0787 protein	9.9	Q3MFP7_ANAVA	Abortive infection protein	9.9	Q8NBE9_HUMAN	Hypothetical protein FLJ33328	9.9
CD077606	Q9Z3X2_9SPHN	2,3-dihydroxybiphenyl 1,2-dioxygenase	5.9
CD083485	Q8KLQ9_STIAU	Branched chain keto acid dehydrogenase (E1) beta subunit (EC 1.2.4.4)	8.1	Q613M7_CAEBR	Hypothetical protein CBG16308 (Fragment)	8.1
CD084466	Q4YST8_PLABE	Hypothetical protein	2	Q8HJF5_ANTMU	NADH dehydrogenase subunit 2	3.4	Q751V5_ASHGO	AFR720Wp	5.8
CD086442	Q3BKI1_9PROT	Hypothetical protein	8.00E-13	Q2ZIY1_CALSA	Hypothetical protein precursor	4.00E-12	Q2ZGF2_CALSA	Hypothetical protein	7.00E-12	Q5M9Z9_TOBAC	Hypothetical protein orf106b	0.43	Q9SKC1_ARATH	Putative glucosyltransferase	8
CD088992	Q6KZ95_PICTO	TenA/THI-4 family protein	3.4	Q4SNU0_TETNG	Chromosome 15 SCAF14542, whole genome shotgun sequence	5.8	Q4RTE0_TETNG	Chromosome 1 SCAF14998, whole genome shotgun sequence. (Fragment)	5.8	Q37DG6_RHOPA	MscS Mechanosensitive ion channel	9.8	Q8MR12_DROME	LD44686p (CG33174-PA, isoform A)	9.8
CD089949	Q5BR20_SCHJA	SJCHGC09721 protein	3.00E-04	Q7V1L0_PROMP	Conserved hypothetical precursor	8.1
CD091466	Q7RQ69_PLAYO	Hypothetical protein	7.8
CD114188	Q4QQE8_SCHMA	Endonuclease-reverse transcriptase	3.00E-22	Q5C0M3_SCHJA	SJCHGC02939 protein (Fragment)	2.00E-05	Q5BST9_SCHJA	SJCHGC03271 protein (Fragment)	1.00E-04	Q5BSZ5_SCHJA	SJCHGC03034 protein	2.00E-04	Q5BRY6_SCHJA	SJCHGC07009 protein (Fragment)	0.006		catalytic activity GO:0003824, binding GO:0005488	physiological process GO:0007582, cellular process GO:0009987
CD115275
CD115917	Q6ZQC4_MOUSE	MKIAA0404 protein (Fragment)	3.1	Q6P4T0_MOUSE	BC023754 protein	3.1	Q9SKR4_ARATH	Hypothetical protein At2g20970	4	Q71UN8_CAEEL	Hypothetical protein	4	Q8CGT6_MOUSE	Miwi 2 protein	9
CD116596	Q5KRI0_CORGL	Hypothetical protein	7.6
CD120623	Q4YPE5_PLABE	Hypothetical protein (Fragment)	5.8	Q7RKY9_PLAYO	Putative bir1 protein	5.8	Q3NTH0_SHEFR	Cytochrome c oxidase, subunit III	9.8
CD122295	Q6K3Y7_ORYSA	Putative ubiquitin-protein ligase 1	0.69	Q4DAX1_TRYCR	Hypothetical protein	3.4	Q65D10_BACLD	Hypothetical protein	5.8	Q4E069_TRYCR	Hypothetical protein	10
CD123248	Q4X5D9_PLACH	Hypothetical protein (Fragment)	9.8	Q7RDR7_PLAYO	Hypothetical protein	9.8
CD126843
CD126750
CD128754	Q7RPL2_PLAYO	Hydrolase, TatD family (Fragment)	2.6	Q6FPE0_CANGA	Candida glabrata strain CBS138 chromosome J complete sequence	4.5	Q4YPR7_PLABE	TatD-like deoxyribonuclease, putative	7.7
CD130467	Q6BZF3_DEBHA	Debaryomyces hansenii chromosome A of strain CBS767 of Debaryomyces hansenii	1.2
CD140007	Q59XC4_CANAL	Hypothetical protein	0.68	Q59X76_CANAL	Hypothetical protein	2.6	Q4C7C7_CROWT	Putative oxygen-independent coproporphyrinogen III oxidase	9.8
CD143047	Q32PM7_BRARE	Hypothetical protein	6.00E-34	Q8IYT4_HUMAN	Hypothetical protein KATNAL2	2.00E-33	Q5QMP6_ORYSA	Vacuolar protein sorting factor 4B-like	1.00E-31	Q7XXR9_ORYSA	Katanin	2.00E-30	Q4T2P6_TETNG	Chromosome undetermined SCAF10214, whole genome shotgun sequence. (Fragment)	5.00E-30		catalytic activity GO:0003824, binding GO:0005488
CD145684	Q6ZSA2_HUMAN	Hypothetical protein FLJ45698	0.002	Q4YFP1_PLABE	Hypothetical protein (Fragment)	0.003	Q9H6U5_HUMAN	Hypothetical protein FLJ21858	0.006	Q8N8E0_HUMAN	Hypothetical protein FLJ39621	0.008	Q6ZT59_HUMAN	Hypothetical protein FLJ44936	0.038
CD146187
CD149325
CD150046	Q5C264_SCHJA	SJCHGC06886 protein (Fragment)	0.062	Q4QQE8_SCHMA	Endonuclease-reverse transcriptase	0.31	Q5BSY8_SCHJA	SJCHGC03051 protein	0.68	Q4AVS9_9BURK	Protoheme IX farnesyltransferase	5.8	Q5BSV8_SCHJA	SJCHGC03153 protein	5.8
CD152943	Q4QQE8_SCHMA	Endonuclease-reverse transcriptase	0.24
CD152999	Q5CPZ7_CRYPV	Hypothetical protein	1	Q6ZV50_HUMAN	Hypothetical protein FLJ42986	5	Q5CED6_CRYHO	Hypothetical protein	6.6	Q7QG88_ANOGA	ENSANGP00000019967 (Fragment)	6.6	Q4PHU0_USTMA	Hypothetical protein	8.6
CD154506	Q8NH31_HUMAN	Seven transmembrane helix receptor	1.5	Q505E8_MOUSE	Hypothetical protein	5.8	Q4YRS0_PLABE	Hypothetical protein (Fragment)	9.8	Q4YHJ2_PLABE	Hypothetical protein (Fragment)	9.8	Q7RAZ1_PLAYO	Hypothetical protein	9.8
CD155893
CD156651	Q420K6_DESHA	Tripartite ATP-independent periplasmic transporters, DctQ component precursor	5.8	Q43MC7_SOLUS	Hypothetical protein precursor (Fragment)	9.8	Q96IB9_HUMAN	Hypothetical protein (Novel protein) (Fragment)	9.8
CD168908	Q7PNV9_ANOGA	ENSANGP00000021024 (Fragment)	2.6	Q6RHV1_9CAUD	Hypothetical protein	3.4	Q7PSD3_ANOGA	ENSANGP00000016130 (Fragment)	4.5	Q5TUK3_ANOGA	ENSANGP00000016537 (Fragment)	4.5	Q5TQ23_ANOGA	ENSANGP00000000214 (Fragment)	4.5
CD169584	Q60SV1_CAEBR	Hypothetical protein CBG20743	5.9
CD179469
CD181614	Q61W38_CAEBR	Hypothetical protein CBG04582 (Fragment)	7.6	Q8PT11_METMA	5-oxoprolinase (EC 3.5.2.9)	9.9
CD181630	Q9H8X0_HUMAN	Hypothetical protein FLJ13166	4.00E-07	ATS20_HUMAN	ADAMTS-20 precursor (EC 3.4.24.-) (A disintegrin and metalloproteinase with thr	4.00E-07	ATS20_MOUSE	ADAMTS-20 precursor (EC 3.4.24.-) (A disintegrin and metalloproteinase with thr	1.00E-06	Q6UY14_HUMAN	ENWT2803 (Thrombospondin repeat containing 1)	2.00E-05	Q5T5F7_HUMAN	Thrombospondin repeat containing 1	2.00E-05
CD183417
CD186123
CD190369
CD191007	Q9RY75_DEIRA	Hypothetical protein DR0075	10
CD192020	Q4XUL6_PLACH	Dihydroorotate dehydrogenase, mitochondrial, putative	4.5	Q4YTU1_PLABE	Dihydroorotate dehydrogenase, mitochondrial, putative	9.9	Q7RLG4_PLAYO	Dihydroorotate dehydrogenase, putative	9.9
CD192752	Q4QQD7_SCHMA	Reverse transcriptase	6.00E-10	Q7RTK8_SCHMA	Reverse transcriptase	0.037	Q72XZ6_BACC1	DNA-binding response regulator	0.91	Q815N4_BACCR	Two-component response regulator	2.6	Q4XSJ6_PLACH	Hypothetical protein (Fragment)	3.4		catalytic activity GO:0003824, binding GO:0005488	physiological process GO:0007582, cellular process GO:0009987
CD192703	Q5BSV8_SCHJA	SJCHGC03153 protein	0.69
CD196821
CD198315	Q9EMV4_AMEPV	AMV095	9.8
CF500709	Q9BM81_CLOSI	Gag-pol polyprotein	3.00E-10	Q9BM80_CLOSI	Gag-pol polyprotein	3.00E-10	Q9BM79_CLOSI	Gag-pol polyprotein	3.00E-10	Q4QQD5_SCHMA	Gag protein	2.00E-06	Q6IFT9_SCHMA	Gag protein	7.00E-06		binding GO:0005488	physiological process GO:0007582, cellular process GO:0009987
CONTIG10910	Q4YFP1_PLABE	Hypothetical protein (Fragment)	8.00E-05	TCB1_RABIT	T-cell receptor beta chain ANA 11	9.00E-04	Q9PH93_XYLFA	Hypothetical protein	0.001	Q4VBJ0_BRARE	Integrin, beta-like 1	0.003	Q6ZSA2_HUMAN	Hypothetical protein FLJ45698	0.013
CONTIG10902	Q5C387_SCHJA	SJCHGC03776 protein (Fragment)	9.00E-07	Q8T5G5_SCHJA	Polyprotein	1.00E-05	Q8MWP9_SCHJA	Polyprotein (Fragment)	1.00E-05	Q5C3C1_SCHJA	SJCHGC04023 protein (Fragment)	2.00E-04	Q5C3C6_SCHJA	SJCHGC03094 protein (Fragment)	0.004		catalytic activity GO:0003824, binding GO:0005488	physiological process GO:0007582,cellular process GO:0009987
CONTIG12200	Q4QQE8_SCHMA	Endonuclease-reverse transcriptase	3.00E-19	Q5BSV8_SCHJA	SJCHGC03153 protein	3.00E-11	Q5M1J1_STRT1	Hypothetical protein	0.021	Q5M633_STRT2	Conserved hypothetical, predicted membrane protein (TMS7)	0.036	Q5BT30_SCHJA	SJCHGC02932 protein (Fragment)	0.081		catalytic activity GO:0003824, binding GO:0005488	physiological process GO:0007582, cellular process GO:0009987
CONTIG1502	Q8IC15_PLAF7	Hypothetical protein PF07_0024	2.00E-04	Q869W0_DICDI	Similar to Dictyostelium discoideum (Slime mold). homeobox-containing protein (P	0.001	Q54YK3_DICDI	Hypothetical protein	0.001	Q54FE2_DICDI	Hypothetical protein	0.002	Q74LN0_LACJO	Hypothetical protein	0.007
CONTIG1664
CONTIG1900	Q7QGV7_ANOGA	ENSANGP00000012541	1.00E-42	Q9VEB9_DROME	CG7187-PA, isoform A (Cg7187-pb, isoform b)	7.00E-42	Q8MZ49_DROME	GM14473p	7.00E-42	Q8BPZ5_MOUSE	12 days embryo eyeball cDNA, RIKEN full-length enriched library, clone:D230008K1	1.00E-39	Q7ZYQ7_XENLA	Ssbp2-prov protein	1.00E-37	cell GO:0005575, organelle GO:0043226	binding GO:0005488
CONTIG2700
CONTIG3464	Q3BKI1_9PROT	Hypothetical protein	5.00E-44	Q8CM43_VIBVU	Hypothetical protein	1.00E-28	Q8CM40_VIBVU	Hypothetical protein	1.00E-28	Q57T06_SALCH	Hypothetical protein	1.00E-24	Q57J74_SALCH	Hypothetical protein	1.00E-22
CONTIG3538	Q8N8E0_HUMAN	Hypothetical protein FLJ39621	0.003	Q4YFP1_PLABE	Hypothetical protein (Fragment)	0.004	Q6ZSA2_HUMAN	Hypothetical protein FLJ45698	0.01	Q6ZS38_HUMAN	Hypothetical protein FLJ45860	0.01	Q47TA2_THEFY	Surface protein from Gram-positive cocci, anchor region precursor	0.017
CONTIG3678	Q6ZRP5_HUMAN	Hypothetical protein FLJ46204	0.54	Q4RNK8_TETNG	Chromosome 21 SCAF15012, whole genome shotgun sequence. (Fragment)	0.92	Q5FF95_EHRRG	Hypothetical protein	1.6	P87519_BHV4	GP80	2.1	Q5HC77_EHRRW	Putative integral membrane protein (Hypothetical protein)	2.1
CONTIG3669	Q6ZQV8_HUMAN	Hypothetical protein FLJ46861	0.006	Q6ZP83_HUMAN	Hypothetical protein FLJ26336	0.087	Q5DBE9_SCHJA	SJCHGC01974 protein	0.19	Q6ZVA9_HUMAN	Hypothetical protein FLJ42813	0.25	Q4YLP4_PLABE	Hypothetical protein	0.43
CONTIG3777	Q26608_SCHMA	(Liberia) tandem repeat	0.091
CONTIG3753	Q9PH93_XYLFA	Hypothetical protein	0.4	Q3Q728_9GAMM	Exodeoxyribonuclease V, beta subunit	0.89	Q9V4C9_DROME	CG2052-PB, isoform B	1.5	Q7KQN5_DROME	CG2052-PA, isoform A	1.5	Q7K3X3_DROME	GH06573p	1.5
CONTIG3811	Q4QQE8_SCHMA	Endonuclease-reverse transcriptase	8.00E-32	Q5C0M3_SCHJA	SJCHGC02939 protein (Fragment)	3.00E-18	Q5BST9_SCHJA	SJCHGC03271 protein (Fragment)	7.00E-06	Q8REH4_FUSNN	Chromosome partition protein smc	0.062	Q7P523_FUSNV	Chromosome partition protein smc	0.062		catalytic activity GO:0003824, binding GO:0005488	physiological process GO:0007582, cellular process GO:0009987
Contig2716		UNKNOWN 1538	OM0023391-AOP
Contig2699		UNKNOWN 1521	OM0023393-AOP
CONTIG4627	Q9TUJ0_BOVIN	Growth hormone-releasing hormone receptor long form	0.88	Q59YX7_CANAL	Potential fungal zinc cluster transcription factor	1.2	Q59YJ0_CANAL	Potential fungal zinc cluster transcription factor	4.4	Q91BF5_NPVST	Hypothetical protein	5.7
CONTIG4923	Q3LVX8_CHLS6	Hypothetical protein	1	Q5C2R6_SCHJA	SJCHGC03442 protein (Fragment)	6.8	Q7T9R7_GVAO	ORF_98	8.9	Q4P9V4_USTMA	Hypothetical protein	8.9
CONTIG6056	Q04327_SCHMA	ORF 2	2.00E-44	O96246_PLAF7	Hypothetical protein PFB0770c	3.00E-13	Q26592_SCHMA	ORF 3 precursor	7.00E-12	Q5DG07_SCHJA	SJCHGC09509 protein	4.00E-06	Q5DAV3_SCHJA	Hypothetical protein	4.00E-06	cell GO:0005575	signal transducer activity GO:0004871, transporter activity GO:0005215	physiological process GO:0007582, cellular process GO:0009987
CONTIG6172	Q9RXQ4_DEIRA	Hypothetical protein DR0254	8.00E-11	Q9RS75_DEIRA	Hypothetical protein DR2252	2.00E-09	Q428B8_DESHA	Hypothetical protein	2.00E-09	Q420B2_DESHA	Hypothetical protein	2.00E-09	Q3BKI0_9PROT	Hypothetical protein	3.00E-09
CONTIG6454	Q4YFP1_PLABE	Hypothetical protein (Fragment)	2.00E-04	Q8N8E0_HUMAN	Hypothetical protein FLJ39621	0.002	Q4T1Z9_TETNG	Chromosome undetermined SCAF10406, whole genome shotgun sequence. (Fragment)	0.003	Q6ZSA2_HUMAN	Hypothetical protein FLJ45698	0.004	Q9PH93_XYLFA	Hypothetical protein	0.02
CONTIG6440
CONTIG6482	P91804_SCHMA	Tegumental antigen Sm20.8 (Tegumental protein Sm 20.8)	2.00E-19	Q7Z1I2_SCHJA	Tegumental protein	9.00E-19	Q5BYF7_SCHJA	SJCHGC08815 protein (Fragment)	1.00E-18	Q86EI5_SCHJA	Clone ZZD336 mRNA sequence	1.00E-18	Q5DDI1_SCHJA	SJCHGC09029 protein	3.00E-16	cell GO:0005575, organelle GO:0043226, protein complex GO:0043229	motor activity GO:0003774, binding GO:0005488	physiological process GO:0007582, cellular process GO:0009987
CONTIG6655
CONTIG7540	Q4QQE8_SCHMA	Endonuclease-reverse transcriptase	2.00E-10	Q5C0M3_SCHJA	SJCHGC02939 protein (Fragment)	0.001	Q5BSV8_SCHJA	SJCHGC03153 protein	2.2	Q332K3_9CAUD	Hypothetical protein	3.7	Q5ISA3_9PRIM	5-alpha-hydroxytryptamine receptor 6 (Fragment)	8.2		catalytic activity GO:0003824, binding GO:0005488	physiological process GO:0007582,cellular process GO:0009987
CONTIG7998
CONTIG8115	Q5C131_SCHJA	SJCHGC04072 protein (Fragment)	2.00E-06
CONTIG8645	Q812E1_MOUSE	Connectin/titin N2A-PEVK (Fragment)	6.00E-84	Q7TN00_RAT	Cardiac titin N2BA isoform (Fragment)	2.00E-83	Q8WZ42_HUMAN	Titin	6.00E-83	Q10465_HUMAN	Elastic titin (Fragment)	6.00E-83	Q7YRF5_CANFA	Cardiac titin (Fragment)	4.00E-82	cell GO:0005575,organelle GO:0043226	structural molecule activity GO:0005198, binding GO:0005488	physiological process GO:0007582, cellular process GO:0009987
SMLA60A09	Q8CG22_MOUSE	OLFR55	4.5	Q4UAC1_THEAN	Hypothetical protein	4.5	Q54P10_DICDI	Hypothetical protein	7.7	Q54HX6_DICDI	Hypothetical protein	7.7
SMLB66D03	Q5C774_SCHJA	SJCHGC02069 protein (Fragment)	0.018	Q5C588_SCHJA	Hypothetical protein	0.018	Q5C5U4_SCHJA	SJCHGC02070 protein (Fragment)	0.58	Q40551_TOBAC	Pistil extensin like protein, partial CDS (Fragment)	1.3	Y1674_METJA	Hypothetical protein MJ1674	2.9
Contig3559		UNKNOWN 2233	OM0023361-AOP
>CL626	Q8N8E0_HUMAN	Hypothetical protein FLJ39621	0.029	Q4YFP1_PLABE	Hypothetical protein (Fragment)	0.19	Q6ZT59_HUMAN	Hypothetical protein FLJ44936	0.19	Q6ZSA2_HUMAN	Hypothetical protein FLJ45698	0.42	Q9PH93_XYLFA	Hypothetical protein	0.71
>CL1191	Q4QQE0_SCHMA	Endonuclease-reverse transcriptase	8.00E-04	Q966U0_DICDI	DdAPN (Hypothetical protein apnA)	5.2	Q7RE18_PLAYO	Putative yir2 protein	6.7
>CL1422	Q4QQE8_SCHMA	Endonuclease-reverse transcriptase	1.00E-10	Q5DCR7_SCHJA	SJCHGC03163 protein	2.00E-09	Q5BS58_SCHJA	SJCHGC06058 protein	7.00E-04	Q5BQS2_SCHJA	SJCHGC09829 protein	7.00E-04	Q5BSN8_SCHJA	SJCHGC03699 protein	0.91		catalytic activity GO:0003824, binding GO:0005488	physiological process GO:0007582, cellular process GO:0009987

## Sheet: 244 female direct
Common	hit1id_lrge	hit1name_lrge	hit1evalue	hit2id	hit2name	hit2evalue	hit3id	hit3name	hit3evalue	hit4id	hit4name	hit4evalue	hit5id	hit5name	hit5evalue
SMW2REPF		S.MANSONI FEMALE W2 REPETITIVE SEQUENCE, CLONE PUC18-116B	OM0023337-AOP
SCMDNAP		S.MANSONI FEMALE-SPECIFIC DNA REPEAT W1	OM0023376-AOP
SMU12442		SCHISTOSOMA MANSONI OZ.A FEMALE-SPECIFIC RETROPOSON SMALPHAFEM-1 REPEAT REGION	OM0023338-AOP
CD066824	Q5AMM3_CANAL	Hypothetical protein	7.6
CD089319	Q5BSG6_SCHJA	SJCHGC04354 protein (Fragment)	0.002	Q5BSC9_SCHJA	SJCHGC05010 protein (Fragment)	0.002	Q8T5G5_SCHJA	Polyprotein	0.003	Q8MWP9_SCHJA	Polyprotein (Fragment)	0.003	Q5BT13_SCHJA	SJCHGC03000 protein (Fragment)	0.004
CD115979	Q5F3K8_CHICK	Hypothetical protein	8.2
CD126636
CD129350	Q26578_SCHMA	ORF-RF2; putative	8.00E-07	Q26575_SCHMA	Fsp-ORF2 cds; putative (Fragment)	8.00E-07	O96854_SCHHA	ORF 2 (Fragment)	0.001	Q8ITE1_SCHMA	Hypothetical protein (Fragment)	0.028
CD163963
CD180856
CD192620
CF493654	Q6IFT8_SCHMA	Pol polyprotein	2.00E-10	Q6IFU3_SCHMA	Pol polyprotein (Fragment)	6.00E-07	Q68NI0_SCHMA	Polyprotein (Fragment)	6.00E-07	Q9TX34_PISOC	POL protein	2.00E-05	Q4QQD4_SCHMA	Pol polyprotein	6.00E-05
CONTIG12760	CO8B_PAROL	Complement component C8 beta chain precursor (Complement component 8 beta subuni	0.22	CO8B_RABIT	Complement component C8 beta chain precursor (Complement component 8 beta subuni	0.85	CO8B_MOUSE	Complement component C8 beta chain precursor (Complement component 8 beta subuni	0.85	CO8B_HUMAN	Complement component C8 beta chain precursor (Complement component 8 beta subuni	0.85	Q4SP15_TETNG	Chromosome 15 SCAF14542, whole genome shotgun sequence	3.2
CONTIG1375	Q4Z615_PLABE	Hypothetical protein (Fragment)	0.18	Q8IKJ2_PLAF7	Hypothetical protein	4.4	Q5TQ40_ANOGA	ENSANGP00000025931	9.8
CONTIG3334	Q9PH93_XYLFA	Hypothetical protein	3.00E-08	Q4YFP1_PLABE	Hypothetical protein (Fragment)	7.00E-05	Q8N8E0_HUMAN	Hypothetical protein FLJ39621	0.006	Q4YLY4_PLABE	Hypothetical protein (Fragment)	0.01	Q4VBJ0_BRARE	Integrin, beta-like 1	0.014
CONTIG3544	Q8XY15_RALSO	Hypothetical protein RSc1948	5.3	Q3SYL4_HUMAN	ARFIP1 protein	9	ARFP1_HUMAN	Arfaptin-1 (ADP-ribosylation factor-interacting protein 1)	9
CONTIG3580	Q75JP0_DICDI	Similar to Plasmodium falciparum (Isolate 3D7). 10b antigen, putative (Hypothet	0.71	NU2M_DASNO	NADH-ubiquinone oxidoreductase chain 2 (EC 1.6.5.3) (NADH dehydrogenase subunit	1.2	Q534D8_AONCA	NADH dehydrogenase subunit 2 (Fragment)	3.5	Q8IAP1_PLAF7	Hypothetical protein MAL8P1.139	3.5	Q5YEQ7_9BRAS	Glycine decarboxylase P-protein (Fragment)	7.8
CONTIG3791	Q3RNV3_9BURK	Hypothetical protein	2.00E-53	Q4BSK4_BURVI	Hypothetical protein	1.00E-36	Q62IR9_BURMA	Hypothetical protein	9.00E-33	Q3BKI1_9PROT	Hypothetical protein	1.00E-28	Q3XDT2_MOOTH	Hypothetical protein	3.00E-27
CONTIG3871	Q54LJ0_DICDI	Hypothetical protein	0.08	Q6LCS8_SACDI	Glucoamylase	0.14	MUC1_YEAST	Mucin-like protein 1 precursor	0.14	Q8K0T1_MOUSE	2310066E14Rik protein	0.18	Q80T73_MOUSE	MKIAA1930 protein (Fragment)	0.18
CONTIG8022	Q54ES1_DICDI	Hypothetical protein	2.1
>CL986	Q6PYV2_SCHJA	Egg protein CP391S	6.00E-10	Q5C204_SCHJA	SJCHGC02040 protein (Fragment)	4.00E-09	Q5C243_SCHJA	SJCHGC03570 protein (Fragment)	3.00E-07	Q5C2B6_SCHJA	SJCHGC09062 protein (Fragment)	5.00E-07	Q86E23_SCHJA	Clone ZZZ32 mRNA sequence	1.00E-06
Contig494		SIMILAR TO TRANSMEMBRANE MATRIX RECEPTOR MUP-4 (6E-04) POSSIBLE ANTISENSE	OM0023363-AOP
Contig6687		UNKNOWN 4132	OM0023373-AOP
Contig770		UNKNOWN 434	OM0023383-AOP
CD065348	Q4QQE8_SCHMA	Endonuclease-reverse transcriptase	0.016	Q5DFU9_SCHJA	SJCHGC02281 protein	0.9	Q5BT19_SCHJA	SJCHGC02981 protein (Fragment)	4.5
CD066648	Q56C44_9CAUD	Gp52 DNA topoisomerase subunit	3.4	Q3A0N9_PELCD	Hypothetical protein	7.5	Q65AG2_YERPE	TraD protein	9.8
CD066600
CD084850
CD085166	Q87NP0_VIBPA	Putative PnuC protein	1.2	Q6FW32_CANGA	Similar to tr|Q07963 Saccharomyces cerevisiae YLR024c UBR2	3.5	Q3UNR1_MOUSE	CDNA, RIKEN full-length enriched library, clone:G130202B02 product:suppression o	4.5	Q8K4P7_MOUSE	Tumorsuppressor St7-like product (Suppression of tumorigenicity 7-like)	4.5	Q36X75_RHOPA	SNF2-related:IMP dehydrogenase/GMP reductase:Helicase, C-terminal:Type III restr	4.5
CD085552
CD086484
CD086657	Q31FQ3_9GAMM	Secretion protein HlyD precursor	7.7
CD087776
CD088273	Q50PB2_ENTHI	Phospholipid-transporting P-type ATPase, putative	0.11
CD091034	Q376W9_RHOPA	Twin-arginine translocation pathway signal precursor	3.4	Q5W7C9_ORYSA	Unknow protein	3.4	O85598_BRUAB	Dihydrolipoamide succinyl transferase	7.5	Q5BBY0_EMENI	Hypothetical protein	7.5	Q5DTV4_MOUSE	MKIAA1726 protein (Fragment)	9.8
CD115686	Q8XLS2_CLOPE	Hypothetical protein CPE0969	2.8	Q4II95_GIBZE	Hypothetical protein	6.2	Y1571_PASMU	Hypothetical UPF0004 protein PM1571	6.2	Q60T01_CAEBR	Hypothetical protein CBG20682	8.1
CD117458	Q99309_HAEIN	Lipopolysaccharide core (lic1) locus. (Fragment)	1.6	LICA2_HAEIN	Protein licA	1.6	O06023_HAESO	Lob1	2.1	Q99311_HAEIN	Lipopolysaccharide core (lic3) locus. (Fragment)	2.1	LIC2A_HAEIN	Lipooligosaccharide biosynthesis protein lex-1 (EC 2.-.-.-)	2.8
Contig1557		SIMILAR TO FEMALE SPECIFIC EGGSHELL PROTEIN (ORF-RF2) 2E-32	OM0023335-AOP
CD134416	YS1_FOAMV	S1 protein	3	Q87040_9RETR	Pol protein (Fragment)	4	Q76U32_FOAMV	Pro-pol protein (Fragment)	4	O12817_9RETR	Pol protein	4	Q26552_SCHMA	Elastase	5.2
CD140803
CD156192	Q7QX89_GIALA	GLP_217_24561_22924	7.6
CD163376	Q3KTD5_SCHJA	SJCHGC09844 protein (Fragment)	2.6	Q5BR34_SCHJA	SJCHGC09704 protein (Fragment)	2.6
Contig1975		UNKNOWN 937	OM0023386-AOP	hypothetical	hypothetical
CD180692	Q4A6B4_MYCS5	Hypothetical protein	2	Q7NBK7_MYCGA	Conserved hypothetical	3.4	Q7WSJ7_BRECH	CcdA homolog	3.4	Q8IM41_PLAF7	Hypothetical protein	9.9
CD194684
CONTIG12176	Q6ZSA2_HUMAN	Hypothetical protein FLJ45698	0.06	Q6ZTU1_HUMAN	Hypothetical protein FLJ44225	0.3	Q6ZQV8_HUMAN	Hypothetical protein FLJ46861	0.39	Q4HH03_CAMCO	Competence locus E (ComE3), putative	2.5	Q4Z1T7_PLABE	Hypothetical protein (Fragment)	2.5
CONTIG3234	Q8BZN1_MOUSE	Adult male diencephalon cDNA, RIKEN full-length enriched library, clone:9330155	1.9	Q8WF35_9BIVA	Cytochrome c subunit III	4.2	Q9T238_PHYIN	SecY-independent transporter protein	5.5	Q9G8N7_NAEGR	Haem lyase	5.5	Q318A9_PROMA	CRCB protein-like	9.4
CONTIG3438	Q7QGI0_ANOGA	ENSANGP00000015396 (Fragment)	0.45	Q9VTK6_DROME	CG7368-PA (IP08855p)	1	Q8CRF2_STAES	Hypothetical protein SE1838	2.2	Q5HLY3_STAEQ	Drug transporter, putative	2.2
CONTIG4127	Q6BNL0_DEBHA	Debaryomyces hansenii chromosome E of strain CBS767 of Debaryomyces hansenii	3.3	YM96_YEAST	Hypothetical 113.1 kDa protein in PRE5-FET4 intergenic region	4.3	Q73EE6_BACC1	Phage structural protein, truncation	5.6	Q8JIR8_CHICK	SPACR	7.3	Q8G4E5_BIFLO	Hypothetical protein	9.5
CONTIG4299	Q7BI81_ACTPL	Type IV pilin biogenesis protein	2.3	Q6XFB0_ACTPL	Fimbrial biogenesis protein	3.9	Q6XFA5_ACTPL	Fimbrial biogenesis protein	3.9	Q6YMZ1_9HYME	Cytochrome c oxidase subunit II (Fragment)	8.6
CONTIG4703	Q5X344_LEGPA	Hypothetical protein	3.4	Q9YCS4_AERPE	Hypothetical protein APE1187	9.8
CONTIG4786	Q60D68_ORYSA	Hypothetical protein OSJNBa0073C10.12	4.4
CONTIG4952	Q6PYW4_SCHJA	Egg protein CP111	0.31	Q4YTG8_PLABE	Hypothetical protein (Fragment)	0.91	Q55AV6_DICDI	Hypothetical protein	2.6	Q4YTK6_PLABE	Dihydrolipoamide acyltransferase, putative	3.5	Q5C243_SCHJA	SJCHGC03570 protein (Fragment)	3.5
CONTIG7229
CONTIG7565	Q5C2B6_SCHJA	SJCHGC09062 protein (Fragment)	0.004	Q5C243_SCHJA	SJCHGC03570 protein (Fragment)	0.006	Q5DDQ6_SCHJA	SJCHGC06503 protein	0.01	Q5C204_SCHJA	SJCHGC02040 protein (Fragment)	0.11	Q86E23_SCHJA	Clone ZZZ32 mRNA sequence	0.11
CONTIG8042	Q8WRD2_PLABE	Cysteine repeat modular protein 1 PbCRM1	0.71	Q4Z799_PLABE	Hypothetical protein (Fragment)	1.2	Q72WZ4_BACC1	Hypothetical protein	6	Q4Z617_PLABE	Hypothetical protein (Fragment)	7.8	Q3M0W5_PARTE	Dynamin-related protein, putative	7.8
CONTIG8797
SMLA12H08
SMLA55E03
SMLC33G01	Q7QFJ9_ANOGA	ENSANGP00000017293 (Fragment)	1.00E-05	Q622W0_CAEBR	Hypothetical protein CBG01998	2.00E-05	Q60YW4_CAEBR	Hypothetical protein CBG18058	2.00E-05	Q7QJU3_ANOGA	ENSANGP00000009300 (Fragment)	4.00E-05	Q9VCK9_DROME	CG10182-PA	5.00E-05
Contig3347		UNKNOWN 2045	OM0023364-AOP
>CL366	Q61YU9_CAEBR	Hypothetical protein CBG03391	3.3	Q9XXK7_CAEEL	Hypothetical protein	4.3	Q9U3P5_CAEEL	Hypothetical protein	4.3
>CL359	Q45VA2_9NEOP	Dopamine transporter	5.00E-56	Q9V7R0_DROME	CG8380-PA (Dopamine transporter) (GH22929p)	9.00E-53	Q9NB97_DROME	Dopamine transporter	9.00E-53	Q7QJ94_ANOGA	ENSANGP00000017838 (Fragment)	3.00E-52	Q45VA3_BOMMO	Dopamine transporter	8.00E-52
Contig5007		UNKNOWN 2877	OM0023358-AOP
Contig4944		UNKNOWN 2816	OM0023363-AOP	Unknown (protein for MGC:33928) [Homo sapiens]	Unknown (protein for MGC:33928) [Homo sapiens]
Contig4977		UNKNOWN 2849	OM0023363-AOP
Contig5204		UNKNOWN 3049	OM0023332-AOP
Contig5135		UNKNOWN 2993	OM0023356-AOP
Contig5532		SIMILAR TO GAG-POL POLYPROTEIN (7E-10)	OM0023367-AOP
Contig6183		UNKNOWN 3712	OM0023346-AOP
Contig6240		UNKNOWN 3761	OM0023346-AOP
Contig629		SIMILAR TO 2410089E03RIK PROTEIN (1E-05) POSSIBLE ANTISENSE	OM0023346-AOP
Contig6919		UNKNOWN 4332	OM0023380-AOP
Contig6696		UNKNOWN 4141	OM0023373-AOP
Contig6704		UNKNOWN 4149	OM0023373-AOP
Contig6888		UNKNOWN 4310	OM0023381-AOP
Contig6881		UNKNOWN 4304	OM0023381-AOP	hypothetical	hypothetical
Contig6715		UNKNOWN 4158	OM0023373-AOP
Contig754		UNKNOWN 421	OM0023383-AOP
Contig987		SIMILAR TO ORF-RF2 (2E-21) POSSIBLE ANTISENSE	OM0023376-AOP
SMU66334		SCHISTOSOMA MANSONI SR1 NON-LTR RETROTRANSPOSON, INTERNAL FRAGMENT E3, POL PSEUD	OM0023337-AOP
SMU10109		SCHISTOSOMA MANSONI FEMALE-SPECIFIC REPETITIVE DNA, REPEAT W2	OM0023338-AOP
AF448819S2		SCHISTOSOMA MANSONI ADENYLOSUCCINATE LYASE (ASL) GENE, EXONS 4 AND 5	OM0023389-AOP
Contig5209		UNKNOWN 3053	OM0011067-NOP	hypothetical	hypothetical
Contig5209d
Contig5210d
AI764806
AI447059
CD059471
CD060670	Q3LZY9_9UROC	Pituitary homeobox transcript variant 1	0.91	Q3LZY8_9UROC	Pituitary homeobox transcript variant 2	0.91	Q3LZY6_9UROC	Pituitary homeobox transcript variant 4	0.91	Q5EVI6_9UROC	Pitx	2	Q8ZLP4_SALTY	Putative protease	5.9
CD061816	Q9ZZX1_YEAST	SCAI5alpha protein	1.2	Q8W770_YEAST	SCAI5alpha protein	1.2	Q6WUC2_PAPSO	(R,S)-reticuline 7-O-methyltransferase	7.5	Q4RHN4_TETNG	Chromosome 19 SCAF15045, whole genome shotgun sequence. (Fragment)	9.8
CD062148	Q6XA09_9PLEO	Nonribosomal peptide synthase	1.4
CD063340	Q5C0M3_SCHJA	SJCHGC02939 protein (Fragment)	2.00E-34	Q4QQE8_SCHMA	Endonuclease-reverse transcriptase	4.00E-28	Q5BST9_SCHJA	SJCHGC03271 protein (Fragment)	0.001	Q55BM1_DICDI	Hypothetical protein DDB0230126	0.002	Q8IDY6_PLAF7	Hypothetical protein PF13_0190	0.047
CD065860
CD066072	Q4XW04_PLACH	Hypothetical protein	8.3
CD066006	Q9S2Q1_STRCO	Hypothetical protein SCO2185	7.7
CD066571	Q4QQE8_SCHMA	Endonuclease-reverse transcriptase	3.00E-12	Q5BT30_SCHJA	SJCHGC02932 protein (Fragment)	0.004	Q9AW75_GUITH	Hypothetical protein	2.3	Q8IL76_PLAF7	Hypothetical protein	4	Q5R8Y9_PONPY	Hypothetical protein DKFZp468J085 (Fragment)	6.7
CD068241
CD069398	Q814Z9_BACCR	Secreted polysaccharide polymerase	7.5
CD073085
CD077344	Q3QMY8_9RHOB	Similar to ABC-type uncharacterized transport system periplasmic component precu	4.6	Q4YQM0_PLABE	Hypothetical protein (Fragment)	7.9	Q50PC6_ENTHI	Protein kinase, putative	7.9
CD077729	Q5BZJ6_SCHJA	SJCHGC08482 protein (Fragment)	4.00E-35	O62446_CAEEL	Hypothetical protein	1.00E-04	Q61YG1_CAEBR	Hypothetical protein CBG03556 (Fragment)	5.00E-04	Q7QD48_ANOGA	ENSANGP00000010959 (Fragment)	0.001	Q96KR5_HUMAN	Leishmanolysin-like peptidase, variant 2 (EC 3.4.24.36)	0.001
CD077799	Q87ME4_VIBPA	Putative membrane-associated Zn-dependent protease	5.7	Q9EMJ4_AMEPV	AMV212	7.5	Q8IAT1_PLAF7	Hypothetical protein MAL8P1.113	9.8	YE08_SCHPO	Putative mitochondrial carrier C17H9.08	9.8
CD079920	Q40IV7_EHRCH	Phage uncharacterized protein, C-terminal	3.8
CD081460	Q7RTK6_SCHMA	Integrase (Fragment)	0.26	Q6IFU3_SCHMA	Pol polyprotein (Fragment)	1.3
CD083357	Q6PJM4_HUMAN	KIAA1404 protein (Fragment)	4.2	Q5JXR7_HUMAN	KIAA1404 protein (Fragment)	4.2	Q5JXR6_HUMAN	KIAA1404 protein	4.2	Q5JXR5_HUMAN	KIAA1404 protein (Fragment)	4.2	K1404_HUMAN	Protein KIAA1404	4.2
CD084549	Q3RNV3_9BURK	Hypothetical protein	6.00E-47	Q4BSK4_BURVI	Hypothetical protein	3.00E-35	Q62IR9_BURMA	Hypothetical protein	6.00E-28	Q3XDT2_MOOTH	Hypothetical protein	3.00E-27	Q3BKI1_9PROT	Hypothetical protein	6.00E-17
CD085092
CD085414
CD086861	Q87R97_VIBPA	Putative oxidoreductase protein	4.9
CD087182	Q3VRS3_PROAE	Hypothetical protein	0.11	Q9VMQ7_DROME	CG6907-PA (AT14778p)	2.6	Q55CR5_DICDI	Hypothetical protein	3.4	Q50NC4_ENTHI	Hypothetical protein	5.8	Q3U166_MOUSE	Activated spleen cDNA, RIKEN full-length enriched library, clone:F830013A07 prod	7.5
CD087217
CD087601	Q8IBS4_PLAF7	Hypothetical protein MAL7P1.87	1.4	Q7RTC4_PLAYO	Hypothetical protein (Fragment)	3.2	Q4YJK3_PLABE	Hypothetical protein (Fragment)	4.1	Q6C544_YARLI	Similar to tr|Q8NKG8 Kluyveromyces lactis Putative delta 8-sphingolipid desatura	4.1	Q98RZ5_GUITH	Hypothetical protein orf419	5.4
CD088178	Q5ZUJ5_LEGPH	Hypothetical protein	3.4	Q5X4B4_LEGPA	Hypothetical protein	3.4
CD087993
CD088608
CD088473	Q9PH93_XYLFA	Hypothetical protein	0.003	Q6ZT59_HUMAN	Hypothetical protein FLJ44936	0.028	Q8N8E0_HUMAN	Hypothetical protein FLJ39621	0.062	Q4YLP4_PLABE	Hypothetical protein	0.081	Q4YFP1_PLABE	Hypothetical protein (Fragment)	0.081
CD089057	Q4QQE8_SCHMA	Endonuclease-reverse transcriptase	1.00E-09	Q5BST9_SCHJA	SJCHGC03271 protein (Fragment)	3.00E-09	Q5DHV0_SCHJA	SJCHGC03719 protein	0.016	Q4C2A0_CROWT	Hypothetical protein	1.5	Q4DCR4_TRYCR	Hypothetical protein	3.4
CD089069	Q5A1D5_CANAL	Hypothetical protein SPT16	9.8
CD089351	Q44G05_CHRSL	Hypothetical protein	5.00E-05	Q83K16_SHIFL	Hypothetical protein	5.00E-04	Q3BKI5_9PROT	Hypothetical protein	0.002	Q87U55_PSESM	Hypothetical protein	0.002	Q5W7C9_ORYSA	Unknow protein	0.004
CD090965	Q4CCH7_CLOTM	Glycosyl transferase, group 1:Polysaccharide pyruvyl transferase	4.00E-10	Q81HC0_BACCR	Putative pyruvyl-transferase	7.00E-10	Q6HMU1_BACHK	Pyruvyl-transferase	5.00E-09	Q9L471_BACAN	Hypothetical pyruvyl-transferase (CsaB protein)	1.00E-08	Q3Y682_BACSH	CsaB	1.00E-08
CD090864
CD092787	Q4QKV3_HAEI8	Hypothetical protein	0.14	Q3DXT9_CHLAU	Na-Ca exchanger/integrin-beta4	3.4
CD092609
CD093088
CD093951	Q7TMM3_MOUSE	Arl6ip2 protein	0.001	Q95LN3_MACFA	Hypothetical protein	0.002	Q9H5M7_HUMAN	Hypothetical protein FLJ23293	0.002	Q8NHH9_HUMAN	ARL6IP2	0.002	Q8NHH8_HUMAN	ARL6IP2	0.002
CD097399	Q7RTK6_SCHMA	Integrase (Fragment)	0.055	Q6IFU3_SCHMA	Pol polyprotein (Fragment)	0.27	Q9AW39_GUITH	DNA-directed RNA polymerase I chain-like protein	1.8	Q54N52_DICDI	Hypothetical protein	2.3	Q4UA98_THEAN	Hypothetical protein	3
CD113979	Q3BVS1_XANCV	Heat shock protein	10
CD116831
CD117168
CD117545
CD118407	Q7RTK8_SCHMA	Reverse transcriptase	0.014	Q4YZT1_PLABE	Hypothetical protein (Fragment)	6.7
CD127719	Q26575_SCHMA	Fsp-ORF2 cds; putative (Fragment)	2.00E-07	Q26578_SCHMA	ORF-RF2; putative	1.00E-06	Q8ITE1_SCHMA	Hypothetical protein (Fragment)	4.00E-06	O96854_SCHHA	ORF 2 (Fragment)	0.095	Q26596_SCHMA	Ser- and Thr-rich protein (Fragment)	0.36
CD128521	Q6YRT3_SYNY3	Slr6071 protein (Slr6012 protein)	8
CD130116	Q5F3M8_CHICK	Hypothetical protein	1.00E-41	Q3UJQ9_MOUSE	CRL-1722 L5178Y-R cDNA, RIKEN full-length enriched library, clone:I730058H05 pro	1.00E-41	Q3U9P7_MOUSE	Bone marrow macrophage cDNA, RIKEN full-length enriched library, clone:I830034F0	1.00E-41	Q3TIW6_MOUSE	CDNA, RIKEN full-length enriched library, clone:I530028F18 product:3-oxoacid CoA	1.00E-41	SCOT_MOUSE	Succinyl-CoA:3-ketoacid-coenzyme A transferase 1, mitochondrial precursor (EC 2.	1.00E-41
CD130384	VPS52_YEAST	Vacuolar protein sorting protein 52 (Suppressor of actin mutation protein 2)	5.8	Q61UL0_CAEBR	Hypothetical protein CBG05260	7.6
CD131675	Q9N4H8_CAEEL	Hypothetical protein	2.6	Q5QHE3_RAPSA	S-locus glycoprotein (Fragment)	9.9
CD132739
CD133269	Q8T5G5_SCHJA	Polyprotein	4.5	Q5BT24_SCHJA	SJCHGC02964 protein	4.5	Q8MWP9_SCHJA	Polyprotein (Fragment)	4.5	Q3W1I3_9ACTO	ABC transporter, transmembrane region:ABC transporter	5.8	Q5BSF5_SCHJA	SJCHGC04561 protein (Fragment)	7.6
CD141039	Q6NW45_BRARE	Zgc:66110 protein	8.00E-10	Q6PHF5_BRARE	Hypothetical protein zgc:66110	2.00E-09	Q4SAF6_TETNG	Chromosome 13 SCAF14688, whole genome shotgun sequence. (Fragment)	2.00E-08	Q68FJ5_XENLA	MGC86218 protein	5.00E-07	Q5GRN9_WOLTR	Dihydrolipoamide acyltransferase E2 component	1.00E-06
CD146752	Q5WQ03_9ENTR	3-isopropylmalate dehydratase large subunit	3.7	Q7YZT1_DICDI	Secreted protein DicB precursor	6.4
CD149395	PUT3_YEAST	Proline utilization trans-activator	3.4	Q86IF7_DICDI	Similar to Arabidopsis thaliana (Mouse-ear cress). Gb|AAD32909.1	9.9	Q559A2_DICDI	Hypothetical protein DDB0231216	9.9
CD149008	Q5TVD7_ANOGA	ENSANGP00000026329	0.53	Q5TTN4_ANOGA	ENSANGP00000028403	0.69	Q3IJ30_PSEHT	Bifunctional protein (Iron-sulfur protein) (EC 4.2.1.3) (EC 4.2.1.99) [Includes:	4.5	Q75DI6_ASHGO	ABR038Cp	4.5	Q83SM4_SHIFL	Aconitate hydrase B	5.9
CD151713	Q5DDT5_SCHJA	SJCHGC02523 protein	3.00E-35	Q3Y3B8_ENTFC	Alpha amylase, catalytic region	3.00E-16	Q74KK9_LACJO	Oligo-1,6-glucosidase	1.00E-15	O16G_BACTR	Oligo-1,6-glucosidase (EC 3.2.1.10) (Oligosaccharide alpha-1,6-glucosidase) (Suc	2.00E-14	Q4HAV0_9DEIO	Alpha amylase, catalytic region	6.00E-14
CD152773
CD160127	Q7ZX24_XENLA	MGC68804 protein (Fragment)	2.7	Q6P7F6_XENLA	MGC68804 protein	2.7	Q4XAQ9_PLACH	Hypothetical protein (Fragment)	2.7	Y650_METJA	Hypothetical protein MJ0650 precursor	2.7	Q49VU9_STAS1	Putative helicase	3.5
CD161553	Q4QQD7_SCHMA	Reverse transcriptase	1.00E-04	Q6S016_DROME	Reverse transcriptase	0.01	Q6S015_DROME	Reverse transcriptase	0.01	Q9GSW3_DROVI	Hypothetical protein	0.01	Q9GSW2_DROVI	Hypothetical protein	0.01
CD162657
CD165020	Q4I9L9_GIBZE	Hypothetical protein	2.00E-19	Q9HEI9_NEUCR	Related to the component Tra1 of the SAGA complex	3.00E-15	Q7S7K6_NEUCR	Related to the component Tra1 of the SAGA complex	3.00E-15	Q4WED0_ASPFU	Histone acetylase complex subunit Paf400, putative	1.00E-10	Q5AUN0_EMENI	Hypothetical protein	3.00E-10
CD166334
CD167174	Q6PJ54_HUMAN	NEB protein (Fragment)	1.00E-35	Q53QQ2_HUMAN	Hypothetical protein NEB (Fragment)	1.00E-35	Q14214_HUMAN	Nebulin (Fragment)	1.00E-35	NEBU_HUMAN	Nebulin	1.00E-35	Q4RTL9_TETNG	Chromosome 2 SCAF14997, whole genome shotgun sequence	3.00E-24
CD167112	Q4D519_TRYCR	Lipase, putative (Fragment)	9.9
CD167034	Q4QQE8_SCHMA	Endonuclease-reverse transcriptase	6.00E-19	Q5BSV8_SCHJA	SJCHGC03153 protein	0.001	Q5BSE4_SCHJA	SJCHGC04778 protein (Fragment)	0.001	Q5BT64_SCHJA	SJCHGC02633 protein (Fragment)	0.017	Q5DGI4_SCHJA	SJCHGC03084 protein	0.11
CD167979	Q4QQE8_SCHMA	Endonuclease-reverse transcriptase	3.00E-09	Q5BSV8_SCHJA	SJCHGC03153 protein	4.00E-07	Q8I5Z0_PLAF7	Hypothetical protein	7.6
CD169611	Q4QQD5_SCHMA	Gag protein	0.082	Q9BM81_CLOSI	Gag-pol polyprotein	0.18	Q9BM80_CLOSI	Gag-pol polyprotein	0.18	Q9BM79_CLOSI	Gag-pol polyprotein	0.18	Q6IFT9_SCHMA	Gag protein	0.41
CD171487	Q6ZR84_HUMAN	Hypothetical protein FLJ46559	1.2	Q3SKD0_THIDA	Heavy metal efflux pump CzcA precursor	7.6	Q3VRC0_PROAE	Ferric-uptake regulator	10
CD179196	Q97FE8_CLOAB	Uncharcterized conserved membrane protein, YXAI B.subtilis homolog	0.91	Q3VVF9_PROAE	Radical SAM	1.6	Q8I5H0_PLAF7	Hypothetical protein	2	Q7RNU5_PLAYO	Putative yir3 protein	2.6	Q992J3_9RETR	Envelope polyprotein	4.5
CD185218	Q697G3_9HEMI	ATP synthase F0 subunit 6	0.004	Q6CB32_YARLI	Similarity	0.022	Q8RMF3_9STRE	Histidine kinase ComD	0.063	Q8VAS3_WSSV	Wsv319	0.082	Q70NW5_9BILA	NADH dehydrogenase subunit 5	0.11
CD187282	Q6T9T7_VITRI	Resistance protein candidate (Fragment)	3.2	Q2ZYP6_STRSU	Glycerone kinase (EC 2.7.1.29)	7	Q6UJ70_MALDO	NBS-LRR resistance gene-like protein ARGH12 (Fragment)	9.2	DKK3_CHICK	Dickkopf-related protein 3 precursor (Dkk-3) (Dickkopf-3) (Lens fiber protein CL	9.2
CD188141
CD188518	Q2XVY0_PUCGR	Hypothetical chitin synthase class V	4.4	Q8IBJ6_PLAF7	Hypothetical protein MAL7P1.142	7.6	Q59DS2_DROME	CG33544-PA	9.9	YMF16_MARPO	Hypothetical tatC-like protein ymf16 (ORF 244)	9.9
CD189609
CD196229	Q9AW33_GUITH	26S proteasome regulatory subunit	5.8	Q8I6U7_PLAF7	Citrate synthase, mitochondrial, putative	5.8	Q4XTQ6_PLACH	Hypothetical protein	7.6	Q8I5M6_PLAF7	Hypothetical protein	7.6	Q98RU1_GUITH	Hypothetical protein orf461	9.9
CD201697	Q4YUY3_PLABE	Guanylyl cyclase, putative	4.4	Q7RLZ5_PLAYO	CCAAT-box DNA binding protein subunit B (Fragment)	4.4
CF498163	Q6IFU3_SCHMA	Pol polyprotein (Fragment)	1.00E-30	Q9BM81_CLOSI	Gag-pol polyprotein	2.00E-30	Q4QQF8_SCHMA	Pol polyprotein	2.00E-30	Q9BM79_CLOSI	Gag-pol polyprotein	9.00E-30	Q9BM80_CLOSI	Gag-pol polyprotein	1.00E-29
CF499068	Q5C387_SCHJA	SJCHGC03776 protein (Fragment)	3.00E-06	Q5C3C1_SCHJA	SJCHGC04023 protein (Fragment)	3.00E-05	Q8T5G5_SCHJA	Polyprotein	2.00E-04	Q5DER0_SCHJA	SJCHGC03006 protein	0.021	Q8MWP9_SCHJA	Polyprotein (Fragment)	0.047
CF501265	Q4QQF6_SCHMA	Gag-pol polyprotein (Fragment)	2.00E-36	Q4QQF7_SCHMA	Gag-pol polyprotein	5.00E-10	Q4QQF4_SCHMA	Gag-pol polyprotein	1.00E-08	Q5XUN2_SCHMA	Reverse transcriptase (Fragment)	2.00E-05	Q5XUN3_SCHMA	Reverse transcriptase (Fragment)	5.00E-04
CF501183	Q5TQT3_ANOGA	ENSANGP00000027601 (Fragment)	1.00E-12	Q5TPT3_ANOGA	ENSANGP00000028697 (Fragment)	6.00E-08	Q4QQF4_SCHMA	Gag-pol polyprotein	1.00E-07	P91422_CAEEL	Hypothetical protein	7.00E-07	Q8JIX4_BRARE	SI:dZ125J23.11 (Gypsy Danio rerio 1 polyprotein)	2.00E-06
CF502366	Q7XWT6_ORYSA	OSJNBa0065B15.15 protein (OSJNBa0028M15.5 protein)	3.00E-07	Q5WMQ7_ORYSA	Putative polyprotein	9.00E-06	Q7G4N7_ORYSA	Transposon protein, putative, CACTA, En/Spm sub-class	4.00E-05	Q53QR1_ORYSA	Transposase family tnp2, putative	4.00E-05	Q33AS3_ORYSA	Transposon protein, putative, CACTA, En/Spm sub-class	5.00E-05
CF503259	Q9BM79_CLOSI	Gag-pol polyprotein	8.00E-13	Q9BM81_CLOSI	Gag-pol polyprotein	7.00E-12	Q9BM80_CLOSI	Gag-pol polyprotein	8.00E-10	Q7PCR6_ANOGA	ENSANGP00000017444 (ENSANGP00000018521) (Fragment)	1.00E-07	Q5TNP3_ANOGA	ENSANGP00000028338 (Fragment)	2.00E-05
CF502950	Q848X1_BACME	Hypothetical protein	6.00E-13	Q4EFZ9_LISMO	Hypothetical protein	8.00E-13	Q8CME1_VIBVU	Cell wall-associated hydrolase	3.00E-11	Q68XF8_RICTY	Hypothetical protein	3.00E-11	Q3FZD2_9DELT	Hypothetical protein	7.00E-11
CF502958	Q4QQD4_SCHMA	Pol polyprotein	9.00E-12	Q6IFT8_SCHMA	Pol polyprotein	4.00E-10	Q5C300_SCHJA	SJCHGC06882 protein (Fragment)	7.00E-09	Q5C2Z3_SCHJA	Hypothetical protein	7.00E-09	Q9BM79_CLOSI	Gag-pol polyprotein	2.00E-08
CONTIG10402	Q8T5G5_SCHJA	Polyprotein	0.61	Q8MWP9_SCHJA	Polyprotein (Fragment)	0.61	Q4A3R1_9VIRU	RNA-directed RNA polymerase (EC 2.7.1.141)	6.7	Q4A3Q4_9VIRU	RNA-directed RNA polymerase (EC 2.7.1.141)	6.7	Q5DBA5_SCHJA	SJCHGC09144 protein	8.8
CONTIG10455	Q4QQE8_SCHMA	Endonuclease-reverse transcriptase	1.00E-42	Q5BSE4_SCHJA	SJCHGC04778 protein (Fragment)	3.00E-26	Q5BT64_SCHJA	SJCHGC02633 protein (Fragment)	6.00E-18	Q5DGI4_SCHJA	SJCHGC03084 protein	1.00E-12	Q5BQS2_SCHJA	SJCHGC09829 protein	3.00E-11
CONTIG10837	Q5C3A3_SCHJA	SJCHGC09318 protein (Fragment)	0.014	Q8T5G5_SCHJA	Polyprotein	0.018	Q8MWP9_SCHJA	Polyprotein (Fragment)	0.018	Q3DZT9_CHLAU	Amidohydrolase 2	2.2	Q572J7_PHYIN	Reverse transcriptase precursor, putative	2.2
CONTIG10955	Q4QQF5_SCHMA	Gag-pol polyprotein	2.00E-12	Q5C201_SCHJA	SJCHGC05312 protein (Fragment)	3.00E-11	Q4QQF3_SCHMA	Gag-pol polyprotein	9.00E-11	Q4QQF7_SCHMA	Gag-pol polyprotein	1.00E-10	Q4QQF2_SCHMA	Gag-pol polyprotein	6.00E-10
CONTIG11008	Q90811_CHICK	Hypothetical protein VTGIII (Fragment)	6.00E-07	Q789D2_CHICK	Reverse transcriptase (Fragment)	6.00E-07	Q08525_CHICK	Hypothetical protein	6.00E-07	Q6S5B0_CHICK	DNA-dependent protein kinase catalytic subunit (Fragment)	2.00E-04	O42110_9SAUR	ORF2	4.00E-04
CONTIG11158	Q9BM81_CLOSI	Gag-pol polyprotein	7.00E-67	Q9BM79_CLOSI	Gag-pol polyprotein	2.00E-66	Q9BM80_CLOSI	Gag-pol polyprotein	2.00E-65	Q7PCR6_ANOGA	ENSANGP00000017444 (ENSANGP00000018521) (Fragment)	2.00E-57	Q5TNP3_ANOGA	ENSANGP00000028338 (Fragment)	5.00E-56
CONTIG11879	Q7KT48_DROME	CG5020-PD, isoform D	5.00E-38	CL190_DROME	Restin homolog (Cytoplasmic linker protein 190) (Microtubule binding protein 190	6.00E-38	Q8C0S5_MOUSE	Adult male testis cDNA, RIKEN full-length enriched library, clone:4932409G17 pro	1.00E-37	Q922J3_MOUSE	Restin	1.00E-37	Q571L7_MOUSE	MKIAA4046 protein (Fragment)	1.00E-37
CONTIG11923	YAR1_YEAST	Ankyrin repeat-containing protein YAR1	4.00E-05	Q9LVG7_ARATH	Ankyrin-like protein (Ankyrin repeat family protein)	2.00E-04	Q9LQP7_ARATH	F24B9.19 protein	3.00E-04	Q3UN31_MOUSE	11 days embryo spinal cord cDNA, RIKEN full-length enriched library, clone:G6300	0.002	Q3U613_MOUSE	Bone marrow macrophage cDNA, RIKEN full-length enriched library, clone:I830139D0	0.002
CONTIG12029	Q5C5I7_SCHJA	SJCHGC08476 protein (Fragment)	1.00E-31	Q54HF9_DICDI	Hypothetical protein	0.008	Q54W13_DICDI	Hypothetical protein	0.018	Q86A66_DICDI	Similar to Dictyostelium discoideum (Slime mold). developmental protein DG1037	0.031	Q551N6_DICDI	Hypothetical protein	0.031
CONTIG12158
CONTIG12825	Q3IDM7_PSEHT	Sensor protein barA (EC 3.1.1.61)	3.7
CONTIG13118	Q5DBS1_SCHJA	SJCHGC07012 protein	1.00E-97	Q3EH56_ACTSC	Iron-dependent peroxidase	2.00E-17	Q6LTV2_PHOPR	Putative TyrA protein	2.00E-16	Q5BZE5_SCHJA	SJCHGC08670 protein (Fragment)	3.00E-16	Q9FBY9_STRCO	Hypothetical protein SCO7193	5.00E-16
CONTIG13109	Q4X6Z3_PLACH	Hypothetical protein (Fragment)	6.00E-04	Q5C6Q1_SCHJA	SJCHGC01964 protein (Fragment)	0.28	Q5BXG4_SCHJA	Hypothetical protein (Fragment)	1.1	Q4XKX9_PLACH	Hypothetical protein (Fragment)	3.1	Q5C7F5_SCHJA	SJCHGC06841 protein (Fragment)	3.1
CONTIG1345	Q7PUW6_ANOGA	ENSANGP00000008560 (Fragment)	1.2	Q7PXW9_ANOGA	ENSANGP00000017382 (Fragment)	1.2	Q6CEQ2_YARLI	Similar to tr|Q12454 Saccharomyces cerevisiae Hypothetical 26.0 kDa protein YDR0	5.8	Q6D639_ERWCT	GntR-family transcriptional regulator	9.8
CONTIG13295	Q7PPB8_ANOGA	ENSANGP00000004413	1.00E-34	Q9VRT9_DROME	CG13293-PA	2.00E-34	Q4T9R6_TETNG	Chromosome undetermined SCAF7505, whole genome shotgun sequence	7.00E-31	CI126_MOUSE	Protein C9orf126 homolog	6.00E-30	Q3SXZ2_HUMAN	Hypothetical protein C9orf126	2.00E-29
CONTIG2071	Q7PXC7_ANOGA	ENSANGP00000009757 (Fragment)	0.099	Q8BXF5_MOUSE	10 days neonate cerebellum cDNA, RIKEN full-length enriched library, clone:B9300	0.17	Q8BWH9_MOUSE	13 days embryo lung cDNA, RIKEN full-length enriched library, clone:D430024F16 p	0.17	Q8BJR5_MOUSE	10 days neonate cortex cDNA, RIKEN full-length enriched library, clone:A830007F2	0.17	Q8BGL2_MOUSE	Adult male adrenal gland cDNA, RIKEN full-length enriched library, clone:B330013	0.17
CONTIG2578	Q5BSV8_SCHJA	SJCHGC03153 protein	0.003	Q4QQE8_SCHMA	Endonuclease-reverse transcriptase	0.036	Q7RLQ9_PLAYO	Putative arginyl-tRNA synthetase	5.8	Q8IFP9_PLAF7	Hypothetical protein PFD1030c	7.6
CONTIG3040	Q54XX0_DICDI	Hypothetical protein	0.15	O97291_PLAF7	Hypothetical protein MAL3P7.21	0.99	Q55DH9_DICDI	Hypothetical protein	0.99	Q9I8F3_CHICK	Muscle-derived protein 62	1.3	RPOA2_PYRKO	DNA-directed RNA polymerase subunit A'' (EC 2.7.7.6)	2.2
CONTIG3394
CONTIG3554	Q3BKI1_9PROT	Hypothetical protein	3.00E-16	Q3BKI0_9PROT	Hypothetical protein	5.00E-15	Q2ZIY1_CALSA	Hypothetical protein precursor	1.00E-12	Q2ZGF2_CALSA	Hypothetical protein	7.00E-12	Q9RXQ4_DEIRA	Hypothetical protein DR0254	3.00E-08
CONTIG3516	Q3F107_BACTI	Multidrug resistance ABC transporter ATP-binding and permease protein	4.4	Q8ILC6_PLAF7	Hypothetical protein	7.5
CONTIG3598	Q4QQE2_SCHMA	Endonuclease-reverse transcriptase	1.1
CONTIG3604	Q4BSK4_BURVI	Hypothetical protein	1.00E-32	Q3BKI1_9PROT	Hypothetical protein	2.00E-31	Q62IR9_BURMA	Hypothetical protein	3.00E-29	Q3RNV3_9BURK	Hypothetical protein	1.00E-28	Q3XDT2_MOOTH	Hypothetical protein	3.00E-28
CONTIG3756	Q6CQC1_KLULA	Kluyveromyces lactis strain NRRL Y-1140 chromosome D of strain NRRL Y-1140 of Kl	5.9
CONTIG3763	Q4N232_THEPA	Hypothetical protein	1.1	Q6BP75_DEBHA	Similar to CA1891|IPF10196 Candida albicans IPF10196 unknown function	1.8	Q54RE6_DICDI	Hypothetical protein	2.3	Q7RFI3_PLAYO	Arabidopsis thaliana At3g58560/F14P22_150-related	5.2	Q4U9D5_THEAN	Importin-alpha, putative	5.2
CONTIG3857	Q8IMA6_DROME	CG32000-PA, isoform A (Cg32000-pb, isoform b)	1.00E-18	Q8IG91_DROME	SD17880p	1.00E-18	Q7KQN3_DROME	CG32000-PG, isoform G	1.00E-18	Q8SXV3_DROME	LD19039p (CG32000-PD, isoform D)	1.00E-18	Q8IMA7_DROME	CG32000-PE, isoform E	1.00E-18
Contig2708		UNKNOWN 1530	OM0023391-AOP
Contig2961		UNKNOWN 1720 POSSIBLE ANTISENSE	OM0023397-AOP
CONTIG4719	Q31CQ7_PROMA	Orotate phosphoribosyltransferase (EC 2.4.2.10)	7.9
CONTIG5355	Q4XWJ4_PLACH	Hypothetical protein (Fragment)	7.5
CONTIG5932	Q95XK7_CAEEL	Hypothetical protein	0.55
CONTIG5915	Q8F7I3_LEPIN	Putative lipoprotein	5.8	Q72NY8_LEPIC	Putative lipoprotein	5.8
CONTIG5944	Q5Z6N3_ORYSA	Putative fw2.2	8.00E-05	Q850Y8_ORYSA	Hypothetical protein OSJNBb0027B08.17 (Hypothetical protein OSJNBa0078D06.10)	1.00E-04	Q9M815_ARATH	Hypothetical protein F9I5.19 (At1g52200)	3.00E-04	Q8LE32_ARATH	Hypothetical protein	3.00E-04	Q9SX24_ARATH	F24J5.15 protein	5.00E-04
CONTIG6255	Q9VUH6_DROME	CG9311-PA	1.00E-13	Q960G3_DROME	SD03094p	1.00E-13	Q7QGK9_ANOGA	ENSANGP00000015063	2.00E-13	Q5TVK1_ANOGA	ENSANGP00000017949	2.00E-13	PTN23_MOUSE	Tyrosine-protein phosphatase, non-receptor type 23 (EC 3.1.3.48)	6.00E-12
CONTIG6241	PHO36_YEAST	ADIPOR-like receptor PHO36 (Phosphate metabolism protein 36)	5.7
CONTIG6724	Q801I1_PETMA	Ribosomal protein L7A (Fragment)	7.00E-51	RL7A_ICTPU	60S ribosomal protein L7a	1.00E-49	Q4SQG3_TETNG	Chromosome 4 SCAF14533, whole genome shotgun sequence. (Fragment)	2.00E-49	Q6GQB2_XENLA	MGC80199 protein	4.00E-49	Q6PBZ1_BRARE	Ribosomal protein L7a	2.00E-48
CONTIG7121
CONTIG7483
CONTIG7854	Q5C131_SCHJA	SJCHGC04072 protein (Fragment)	2.00E-70	Q7QD48_ANOGA	ENSANGP00000010959 (Fragment)	9.00E-27	Q61YG1_CAEBR	Hypothetical protein CBG03556 (Fragment)	8.00E-25	Q9VH19_DROME	CG3953-PA (RH66426p) (IX-14 protein)	1.00E-24	O62446_CAEEL	Hypothetical protein	4.00E-24
CONTIG8079
CONTIG8248
CONTIG8340	Q5L0R6_GEOKA	Thiamin pyrophosphokinase	5.00E-04	Q9K9Z2_BACHD	Ribulose-phosphate 3-epimerase	0.14	Q5L0R7_GEOKA	Ribulose-phosphate 3-epimerase (EC 5.1.3.1)	0.14	RPE_BACSU	Ribulose-phosphate 3-epimerase (EC 5.1.3.1) (Pentose-5-phosphate 3-epimerase) (P	0.14	Q81WH8_BACAN	Ribulose-phosphate 3-epimerase	0.24
CONTIG8365
CONTIG8539	Q6IFU1_SCHMA	Pol polyprotein	e-101	Q5C1P5_SCHJA	SJCHGC06497 protein (Fragment)	6.00E-53	Q4QQD2_SCHMA	Gag-pol polyprotein	5.00E-37	Q76C95_DROSI	Hypothetical protein	6.00E-16	Q76C94_DROSI	Hypothetical protein	6.00E-16
CONTIG8674
CONTIG8752	Q7RN78_PLAYO	Hypothetical protein	9
CONTIG8836	Q5D9X3_SCHJA	SJCHGC06866 protein	e-110	Q5BVH5_SCHJA	SJCHGC06865 protein (Fragment)	2.00E-82	Q22251_CAEEL	Hypothetical protein	3.00E-81	Q61ZV5_CAEBR	Hypothetical protein CBG02945	4.00E-80	Q5TD00_HUMAN	COX15 homolog cytochrome c oxidase assembly protein (Yeast)	2.00E-78
Contig3291		UNKNOWN 1992	OM0023396-AOP
CONTIG9380	Q4QQF0_SCHMA	Hypothetical protein	9.00E-19	Q4QQE5_SCHMA	Hypothetical protein	5.00E-17	Q4QQE3_SCHMA	Hypothetical protein	4.00E-12	Q8WS60_BRAFL	Endonuclease/reverse transcriptase	1.00E-04	Q8BLA7_MOUSE	Adult male corpora quadrigemina cDNA, RIKEN full-length enriched library, clone	0.016
SMLA18H03	Q7NKV9_GLOVI	Glr1367 protein	4.4
SMLA27B05
SMLA33C09	Q9RXQ4_DEIRA	Hypothetical protein DR0254	6.00E-08	Q9RS75_DEIRA	Hypothetical protein DR2252	7.00E-06	Q2ZIY1_CALSA	Hypothetical protein precursor	2.00E-04	Q2ZGF2_CALSA	Hypothetical protein	4.00E-04	Q8CM04_COREF	Hypothetical protein	0.002
SMLA34C06	Q20864_CAEEL	Hypothetical protein	6.00E-12	Q61LN3_CAEBR	Hypothetical protein CBG08831	3.00E-10	Q627M7_CAEBR	Hypothetical protein CBG00606	3.00E-10	Q5ZR77_CAEEL	Hypothetical protein R02F11.3	8.00E-10	O16365_CAEEL	Hypothetical protein R02F11.3	8.00E-10
SMLA34D06	Q435R0_9ACTO	Protein kinase:NHL repeat	0.36	Q93UZ9_9BACI	Alkaline pullulanase	2.3	Q3KZC2_SCHJA	SJCHGC03369 protein (Fragment)	2.3	Q4T9X4_TETNG	Chromosome undetermined SCAF7485, whole genome shotgun sequence	8.9	Q8L6A1_EUSGR	Copalyl diphosphate synthetase (Fragment)	8.9
SMLA37C12	Q6IFT8_SCHMA	Pol polyprotein	e-150	Q6IFU3_SCHMA	Pol polyprotein (Fragment)	5.00E-58	Q9BM80_CLOSI	Gag-pol polyprotein	1.00E-57	Q9BM81_CLOSI	Gag-pol polyprotein	2.00E-57	Q9BM79_CLOSI	Gag-pol polyprotein	5.00E-57
SMLA40C01	Q5DCR7_SCHJA	SJCHGC03163 protein	1.00E-09	Q4QQE8_SCHMA	Endonuclease-reverse transcriptase	2.00E-08	Q5BT00_SCHJA	SJCHGC03027 protein	1.6	Q5BSN8_SCHJA	SJCHGC03699 protein	1.6
SMLA3B09	Q4RQJ2_TETNG	Chromosome 2 SCAF15004, whole genome shotgun sequence	4.7	YDT2_SCHPO	Hypothetical protein C6B12.02c in chromosome I	8
SMLA49C08	Q5T3X8_HUMAN	Lin-9 homolog (C. elegans)	6	Q53AM9_9VIRU	Structural polyprotein	7.9	Q53AM6_9VIRU	Structural polyprotein	7.9	Q53AM4_9VIRU	Structural polyprotein	7.9
SMLA4B10	Q8T5G5_SCHJA	Polyprotein	3.00E-04	Q8MWP9_SCHJA	Polyprotein (Fragment)	3.00E-04	Q3KZB4_SCHJA	SJCHGC02980 protein (Fragment)	0.18	Q5C3A3_SCHJA	SJCHGC09318 protein (Fragment)	1.6	Q8N9H4_HUMAN	Hypothetical protein FLJ37139	2
SMLA53F02	Q5C270_SCHJA	SJCHGC04486 protein (Fragment)	e-116	Q7QE03_ANOGA	ENSANGP00000000580 (Fragment)	5.00E-49	PEO1_MOUSE	Twinkle protein, mitochondrial precursor (EC 3.6.1.-) (T7 gp4-like protein with	3.00E-46	Q9VL76_DROME	CG5924-PA	8.00E-46	Q8MZH0_DROME	LD38710p	8.00E-46
SMLC11G08	Q7T0Z5_XENLA	MGC68843 protein	0.011	Q3SZZ4_BOVIN	Hypothetical protein	0.011	AMBP_BOVIN	AMBP protein precursor [Contains: Alpha-1-microglobulin; Inter-alpha-trypsin inh	0.011	Q5FVY6_XENTR	MGC108301 protein	0.025	O70160_CAVPO	Alpha-1-microglobulin/bikunin	0.042
SMLC1D12	Q5DDX8_SCHJA	SJCHGC05814 protein	8.00E-94	Q60Y11_CAEBR	Hypothetical protein CBG18435	7.00E-23	Q6GP13_XENLA	MGC80748 protein	1.00E-21	Q7QAY1_ANOGA	ENSANGP00000020589 (Fragment)	5.00E-21	Q7PQJ8_ANOGA	ENSANGP00000000365	5.00E-21
SMLC28F08	Q5C7C7_SCHJA	SJCHGC02683 protein (Fragment)	0.22	Q5BT59_SCHJA	SJCHGC02684 protein	3.2	Q3CG81_THEET	Hypothetical protein	5.5	Q9XDQ2_ACTAC	ORF12 protein	7.1	Q46C22_METBA	Hypothetical protein	9.3
SMLC30H05	Q5BZM4_SCHJA	SJCHGC02708 protein (Fragment)	1.00E-41	Q4S642_TETNG	Chromosome 9 SCAF14729, whole genome shotgun sequence. (Fragment)	2.00E-15	Q5PXQ2_FUGRU	Sclerotome-related helix-loop-helix type transcription factor	1.00E-14	Q9YHA3_BRARE	Paraxis	2.00E-14	Q6NYA3_BRARE	Par1 protein	2.00E-14
SMLC51A05	Q5DCZ7_SCHJA	SJCHGC08046 protein (Fragment)	9.00E-41	Q6AX37_XENLA	MGC86278 protein	4.00E-08	Q3SZL5_BOVIN	Hypothetical protein MGC127129	6.00E-08	PIGS_RAT	GPI transamidase component PIG-S (Phosphatidylinositol-glycan biosynthesis, clas	7.00E-08	Q8NBL9_HUMAN	CDNA PSEC0119 fis, clone PLACE1002376, highly similar to GPI transamidase compon	9.00E-08
Contig3673		UNKNOWN 2333	OM0023368-AOP
>CL202	Q4S634_TETNG	Chromosome 9 SCAF14729, whole genome shotgun sequence	4.00E-47	Q53G59_HUMAN	Kelch-like 12 variant (Fragment)	4.00E-47	Q9HBX5_HUMAN	Kelch-like protein C3IP1 (Kelch-like 12) (Hypothetical protein FLJ14750)	4.00E-47	Q8BZM0_MOUSE	Adult male diencephalon cDNA, RIKEN full-length enriched library, clone:9330161D	5.00E-47	Q8R2H4_RAT	Kelch-like protein (Kelch-like 12)	5.00E-47
>CL415	Q5DAZ4_SCHJA	SJCHGC03504 protein	9.00E-95	Q6IFU1_SCHMA	Pol polyprotein	3.00E-94	Q4QQD2_SCHMA	Gag-pol polyprotein	5.00E-88	Q7PNV9_ANOGA	ENSANGP00000021024 (Fragment)	2.00E-59	Q9NDN0_BOMMO	RNase H and integrase-like protein (Fragment)	3.00E-54
>CL632
>CL836
>CL1136
>CL1244	Q5P7P4_AZOSE	Hypothetical protein	1.9	Q5CFC5_CRYHO	Hypothetical protein	3.2	Q3KV98_9PHAE	NADH dehydrogenase subunit 6	5.4	Q52YK3_9PHAE	NADH dehydrogenase subunit 6	5.4	Q5CUG1_CRYPV	Hypothetical protein	7.1

## Sheet: 192 male direct
Common	hit1id_lrge	hit1name_lrge	hit1evalue	hit2id	hit2name	hit2evalue	hit3id	hit3name	hit3evalue	hit4id	hit4name	hit4evalue	hit5id	hit5name	hit5evalue
SMLC32H10	Q6PF41_XENLA	MGC68961 protein	1.2	Q9M4H9_VITVI	Putative proline-rich cell wall protein	1.2	Q4RSI9_TETNG	Chromosome 13 SCAF15000, whole genome shotgun sequence. (Fragment)	2	Q8NAA1_HUMAN	Hypothetical protein FLJ35713 (Gametogenetin, isoform a)	2	Q86UU5_HUMAN	Gametogenetin protein 1a	2
SMLA44D07	Q5D8X3_SCHJA	SJCHGC05919 protein	6.00E-58	Q7T0W5_XENLA	MGC68924 protein	7.00E-45	Q7PZX0_ANOGA	ENSANGP00000009174 (Fragment)	1.00E-43	Q811P6_RAT	Mitochondrial transcription factor b1	4.00E-43	Q6IRI6_RAT	Transcription factor B1, mitochondrial	4.00E-43
>CL1259	Q32P36_RAT	Heat shock 70kD protein 1-like	4.00E-69	Q9QWU1_MOUSE	Hsc70t (Fragment)	4.00E-69	Q91ZU4_MOUSE	Heat shock protein Hsc70t (Fragment)	4.00E-69	HS70L_RAT	Heat shock 70 kDa protein 1L (Heat shock 70 kDa protein 1-like) (Heat shock 70 k	4.00E-69	HS70L_MOUSE	Heat shock 70 kDa protein 1L (Heat shock 70 kDa protein 1-like) (Heat shock 70 k	4.00E-69
SMLC3G07	Q86E61_SCHJA	Clone ZZD985 mRNA sequence	1.00E-67	Q4FZR8_RAT	Hypothetical protein	3.00E-20	Q5FC25_CAEEL	Hypothetical protein tag-15	7.00E-20	Q6AZB7_BRARE	Zgc:92428	1.00E-19	Q7PP84_ANOGA	ENSANGP00000014266	1.00E-19
CD136179	Q8N171_HUMAN	EOS protein (Hypothetical protein)	3.00E-08	Q8NF86_HUMAN	Serine protease EOS	3.00E-08	PRSS8_HUMAN	Prostasin precursor (EC 3.4.21.-) [Contains: Prostasin light chain; Prostasin he	3.00E-08	Q920K3_RAT	TMPRSS2	5.00E-08	Q6P7D7_RAT	Transmembrane protease, serine 2	5.00E-08
CONTIG5488	SPO15_SCHPO	Sporulation-specific protein 15	0.19	Q3CI46_THEET	MutS 2 protein	0.25	Q3QVB3_9RHOB	PAS (EC 3.1.1.61)	0.25	Q6PDH4_MOUSE	RIKEN cDNA C130037N17 gene	0.55	Q5DBW4_SCHJA	SJCHGC02889 protein (Fragment)	0.55
CD088143	Q4WAT5_ASPFU	Malate dehydrogenase, putative	4.00E-20	Q5AXP7_EMENI	Hypothetical protein	3.00E-19	Q7SHJ8_NEUCR	Hypothetical protein	2.00E-18	Q4IPQ3_GIBZE	Hypothetical protein	5.00E-18	Q65G14_BACLD	MalS (Malate dehydrogenase) (Decarboxylating)	2.00E-14
CD136139	Q5QBH9_9DIPT	Ribosomal protein L9 (Fragment)	5.00E-46	RL9_DROME	60S ribosomal protein L9	5.00E-44	Q4GXL0_9COLE	Ribosomal protein L9e	8.00E-44	Q7QG52_ANOGA	ENSANGP00000011018	3.00E-43	Q6XIW5_DROYA	Similar to Drosophila melanogaster RpL9 (Fragment)	4.00E-43
SMLC11G01A	CYPH_SCHMA	Peptidyl-prolyl cis-trans isomerase (EC 5.2.1.8) (PPIase) (Rotamase) (Cyclophili	1.00E-81	CYPH_ECHGR	Peptidyl-prolyl cis-trans isomerase (EC 5.2.1.8) (PPIase) (Rotamase) (Cyclophili	3.00E-52	Q5DEE6_SCHJA	SJCHGC06679 protein	1.00E-50	Q6P5J4_BRARE	Ppia protein (Fragment)	2.00E-49	Q7ZWJ9_BRARE	Ppia protein (Fragment)	4.00E-49
CONTIG10378	Q4ALG4_9CHLB	PilT protein, N-terminal	5.4	Q84R16_ARATH	Hypothetical protein At4g13990	7	O23260_ARATH	Hypothetical protein AT4g13990	7
CF496759
Contig5250		SIMILAR TO ASPARTIC PROTEINASE PRECURSOR (EC 3.4.23.-) 6E-22	OM0023332-AOP
SMLA3E04	Q9Y2J7_HUMAN	KIAA0993 protein (Fragment)	2.00E-74	Q8N1T2_HUMAN	Hypothetical protein FLJ37591	2.00E-74	Q8IZQ1_HUMAN	ALFY	2.00E-74	Q6VNB8_MOUSE	BWF1	4.00E-74	Q9VML2_DROME	CG14001-PA	3.00E-73
CONTIG3983	Q4JAD4_SULAC	Conserved protein	3.4	Q4Y6J6_PLACH	Hypothetical protein (Fragment)	4.5	P65_MYCPN	Proline-rich P65 protein	5.8
Contig5035		UNKNOWN 2900	OM0023358-AOP	hypothetical	hypothetical
CD130439
Contig2315		UNKNOWN 1174	OM0023342-AOP
SMLC12B04
SMLC17F12A	IM23_SCHMA	23 kDa integral membrane protein (SM23)	2.00E-79	IM23_SCHHA	23 kDa integral membrane protein (Sh23)	2.00E-72	IM23_SCHJA	23 kDa integral membrane protein (SJ23)	6.00E-65	Q7SY95_XENLA	Cd63-prov protein	2.00E-14	Q9NB08_MANSE	Tetraspanin E118	2.00E-13
SMLA17B08	Q3UV65_MOUSE	Adult male bone cDNA, RIKEN full-length enriched library, clone:9830141N18 produ	1.5	Q4RZ34_TETNG	Chromosome 3 SCAF14969, whole genome shotgun sequence. (Fragment)	5.7
SMLA15E02	Q930H7_RHIME	Hypothetical protein	3.1	Q8RPM4_EHRCH	GTP cyclohydrolase II (Fragment)	3.1	Q3YT81_EHRCJ	GTP cyclohydrolase II (EC 3.5.4.25)	5.3	Q4T479_TETNG	Chromosome undetermined SCAF9786, whole	28.9 (63), Expect(2) = 8.4
CD090688	Q8L1Z1_PSESX	Exonuclease V alpha subunit RecD	5.8	Q4JMR7_9BACT	Predicted flagellar biosynthesis/type III secretory pathway ATPase	9.9
Contig2917		SIMILAR TO 4632434I11RIK PROTEIN (4E-17) 4E-17 POSSIBLE ANTISENSE	OM0023397-AOP
CONTIG3868	O15985_PATYE	Troponin T	2.00E-24	O09344_PATYE	Troponin T	2.00E-24	Q5DGA9_SCHJA	SJCHGC00665 protein	2.00E-24	Q5DGG9_SCHJA	Hypothetical protein	2.00E-24	O15986_PATYE	Troponin T	4.00E-24
CD132428
CONTIG1083	Q8F5Q4_LEPIN	Putative N-acetyl neuramic acid synthetase NeuB (EC 4.1.3.-)	0.14	Q72QE3_LEPIC	Sialic acid synthase	0.14	Q9DEB8_CHICK	Wnt-7a	5.8	Q54P15_DICDI	Hypothetical protein	7.6
SMLC26D12	Q5BWY6_SCHJA	SJCHGC06832 protein (Fragment)	3.00E-23
CONTIG7176	Q6AA29_PROAC	Hypothetical protein	5.00E-12	Q6AA30_PROAC	Transferase, putative tetrahydrodipicolinate N-succinyltransferase	4.00E-11	Q6AFQ1_LEIXX	2,3,4,5-tetrahydropyridine-2-carboxylate N-succinyltransferase	6.00E-05	Q40XE3_KINRA	Transferase hexapeptide repeat	3.00E-04	Q8G3M4_BIFLO	Hypothetical protein	0.004
CD133111
CD081367	Q5BW00_SCHJA	SJCHGC06069 protein (Fragment)	3.00E-75	Q5ZJL4_CHICK	Hypothetical protein	1.00E-18	Q6NS21_XENLA	MGC78822 protein	1.00E-17	Q5PQL4_RAT	ATP/GTP-binding protein	1.00E-17	CLP1_MOUSE	Pre-mRNA cleavage complex II protein Clp1	1.00E-17
CD198411	Q5BY36_SCHJA	SJCHGC05711 protein (Fragment)	6.00E-26	Q4RUU0_TETNG	Chromosome 12 SCAF14993, whole genome shotgun sequence. (Fragment)	1.00E-25	CLH_CAEEL	Probable clathrin heavy chain protein 1	2.00E-25	Q61JG3_CAEBR	Hypothetical protein CBG09806	2.00E-25	Q4S928_TETNG	Chromosome undetermined SCAF14702, whole genome shotgun sequence	4.00E-25
Contig2159		UNKNOWN 1058	OM0023343-AOP
CD132464	Q2ZLQ3_SHEPU	Hypothetical protein	9.9
CD092256	Q8DN78_STRR6	Hypothetical protein spr1875	2.00E-23	Q56SA6_STRTR	Hypothetical protein	5.00E-22	Q56S46_STRT2	Hypothetical protein	5.00E-22	Q8P271_STRP8	Putative 42 kDa protein	1.00E-21	Q8K8E3_STRP3	Hypothetical protein SpyM3_0331 (Putative 42kDa protein)	1.00E-21
Contig1735		UNKNOWN 811	OM0023329-AOP
SMLA40H05	Q7R6L0_GIALA	GLP_170_117413_120967	3.9
CONTIG6774
SMLC39G11	Q621K0_CAEBR	Hypothetical protein CBG02458 (Fragment)	6.00E-05	Q9NB35_PLAFA	Mature parasite-infected erythrocyte surface antigen	8.00E-04	Q06166_PLAFA	Mature parasite-infected erythrocyte surface antigen	8.00E-04	Q4UJ52_THEAN	Hypothetical protein	0.001	Q8I492_PLAF7	Mature parasite-infected erythrocyte surface antigen (MESA) or PfEMP2	0.002
CD092565	Q7SY52_BRARE	Similar to serine/threonine kinase 10	3.4	Q643Z2_CRIFA	Sequence-specific RNA-binding protein	5.8	Q3TAH7_MOUSE	Activated spleen cDNA, RIKEN full-length enriched library, clone:F830014A01 prod	9.9	Q3TA29_MOUSE	Activated spleen cDNA, RIKEN full-length enriched library, clone:F830045B05 prod	9.9	Q9NKX2_BOMMO	Nonclathrin coat protein gamma2-COP (Fragment)	9.9
Contig5290		UNKNOWN 3115	OM0023366-AOP
CD093140
>CL820
CD090245	Q34096_CRIFA	MURF2 protein	2.6	Q6PNB1_9BILA	NADH dehydrogenase subunit 2	5.9	Q45W17_TOXGO	ATP-binding cassette, sub-family G, member 3	7.7	SRA22_CAEEL	Serpentine receptor class alpha-22 (Protein sra-22)	7.7	Q5DFJ7_SCHJA	SJCHGC06594 protein	10
>CL145	Q5DE65_SCHJA	SJCHGC06853 protein	2.00E-14
CD087039	Q8M6D7_9TELE	Cytochrome b	3.4	Q9G283_9TELE	Cytochrome b (Fragment)	4.5	Q8M6D9_9TELE	Cytochrome b (Fragment)	7.6	Q7T3T6_BRARE	Tenascin-R	7.6	Q60NM5_CAEBR	Hypothetical protein CBG22632	7.6
CD154779	Q89X91_BRAJA	Bll0423 protein	1.9	Q34096_CRIFA	MURF2 protein	1.9	Q8VAS4_WSSV	Wsv318	2.5	Q8QTC4_WSSV	WSSV374	2.5	WDR75_XENLA	WD-repeat protein 75	3.2
CD164734	Q4K568_PSEF5	Hypothetical protein	4.00E-64	Q4K565_PSEF5	Hypothetical protein	3.00E-04	Q7NU72_CHRVO	Hypothetical protein	5.00E-04	GNT1B_KLULA	Glucose N-acetyltransferase 1-B (EC 2.4.1.-) (N-acetylglucosaminyltransferase B)	2.4	ZBP2_CHICK	Zipcode-binding protein 2	4.1
CD098508	Q8I341_PLAF7	Hypothetical protein PFI0540w	0.31	Q4YXI5_PLABE	Hypothetical protein (Fragment)	0.69	Q8I3F7_PLAF7	Hypothetical protein PFE1555c	0.9	Q514C7_ENTHI	Hypothetical protein	1.2	Q5QNI1_ORYSA	Putative K+ channel protein	2
CONTIG11237	Q6TMX8_SCHMA	Nicotinic acetylcholine receptor non-alpha subunit precursor	0	Q6TMY2_SCHHA	Nicotinic acetylcholine receptor non-alpha subunit precursor	0	Q6TMY0_SCHBO	Nicotinic acetylcholine receptor non-alpha subunit precursor	0	Q6TMY3_SCHHA	Nicotinic acetylcholine receptor alpha subunit precursor	3.00E-99	Q6TMY1_SCHBO	Nicotinic acetylcholine receptor alpha subunit precursor	1.00E-98
CONTIG7783	Q7RJ30_PLAYO	Hypothetical protein (Fragment)	0.33	Q9UAK6_PLAFA	Serine repeat antigen (Fragment)	2.8	Q9UAK5_PLAFA	Serine repeat antigen (Fragment)	2.8	Q9UAK4_PLAFA	Serine repeat antigen (Fragment)	2.8	Q9UAK3_PLAFA	Serine repeat antigen (Fragment)	2.8
CD091409	O46149_PLADU	Wee1-like kinase	3.00E-15	Q8WSS4_ASTPE	Wee1	5.00E-15	Q26629_STRPU	WEE1-like CDK tyrosine kinase	2.00E-13	Q7Q3B5_ANOGA	ENSANGP00000010303 (Fragment)	1.00E-12	WEE1_DROME	Wee1-like protein kinase (EC 2.7.1.112) (Dwee1)	1.00E-12
SMLC51D07	Q9TYJ2_CAEEL	Hypothetical protein	1.9	Q34JJ9_RHOPA	Hypothetical protein	5.5	Q6XPS9_FUSPS	Trichodiene synthase (Fragment)	7.1	TRI5_FUSPS	Trichodiene synthase (EC 4.2.3.6) (Sesquiterpene cyclase) (TS)	7.1
Contig3051		SIMILAR TO ACTIN (8E-10) POSSIBLE ANTISENSE	OM0023395-AOP
CD202518	LIMD1_MOUSE	LIM domains-containing protein 1	8.00E-26	LIMD1_HUMAN	LIM domains-containing protein 1	8.00E-26	Q7Q9X7_ANOGA	ENSANGP00000011691 (Fragment)	2.00E-24	Q4SH61_TETNG	Chromosome 8 SCAF14587, whole genome shotgun sequence. (Fragment)	4.00E-24	Q9VY77_DROME	CG11063-PB	6.00E-24
CD061794	Q5BZ08_SCHJA	SJCHGC07579 protein (Fragment)	3.00E-44	Q4RUZ5_TETNG	Chromosome 12 SCAF14993, whole genome shotgun sequence. (Fragment)	2.00E-12	Q5EBD0_RAT	SEC14-like 2	2.00E-12	S14L2_RAT	SEC14-like protein 2 (Alpha-tocopherol associated protein) (TAP) (Supernatant pr	2.00E-12	RALB_TODPA	Retinal-binding protein (RALBP)	2.00E-12
CONTIG10270	Q5ZIA1_CHICK	Hypothetical protein	5.00E-11	Q8GUG2_ARATH	Hypothetical protein (At1g50200)	5.00E-10	SYA_ARATH	Alanyl-tRNA synthetase, mitochondrial precursor (EC 6.1.1.7) (Alanine--tRNA liga	5.00E-10	Q68FH3_MOUSE	Aarsl protein (Fragment)	1.00E-09	Q5JTZ9_HUMAN	Alanyl-tRNA synthetase like	2.00E-09
CONTIG7976	Q9YGX6_CHICK	Wnt-5a	0.18	Q8VCV6_MOUSE	Wnt5a protein (13 days embryo male testis cDNA, RIKEN full-length enriched libra	0.18	Q8BMF9_MOUSE	13 days embryo male testis cDNA, RIKEN full-length enriched library, clone:60304	0.18	Q8BM17_MOUSE	Adult female vagina cDNA, RIKEN full-length enriched library, clone:9930016B13 p	0.18	Q5PY99_RAT	WNT5A	0.18
CD138993	Q6B8B1_9ACAR	Ribosomal protein, large P2	3.00E-11	Q8WQJ0_SPOFR	60S acidic ribosomal protein P2	4.00E-11	Q5QBF5_9DIPT	Ribosomal protein P2-like (Fragment)	6.00E-11	Q7TNQ6_MOUSE	Ribosomal protein, large P2	7.00E-11	RLA2_CRYST	60S acidic ribosomal protein P2	7.00E-11
Contig3603		SIMILAR TO L1 RETROPOSON, ORF2 MRNA (5E-30)	OM0023368-AOP
AW061385
CD096846
Contig3592		UNKNOWN 2264	OM0023361-AOP
Contig4739		UNKNOWN 2643	OM0023359-AOP
Contig4996		UNKNOWN 2867	OM0023363-AOP
Contig2409		UNKNOWN 1258	OM0023341-AOP
CF502846	Q5BT13_SCHJA	SJCHGC03000 protein (Fragment)	6.00E-05	Q8T5G5_SCHJA	Polyprotein	0.001	Q8MWP9_SCHJA	Polyprotein (Fragment)	0.001	Q8MWP8_SCHJA	Polyprotein (Fragment)	0.003	Q5BT24_SCHJA	SJCHGC02964 protein	0.003
CD088259	Q6LKK4_PHOPR	Putative AraH,Ribose/xylose/arabinose/galactoside ABC-type transport systems, pe	5.8	Q87QQ4_VIBPA	Hypothetical protein VP1095	7.5	Q8IQ75_DROME	CG32391-PA	7.5	Q89VS0_BRAJA	Bll0975 protein	9.8	Q61H02_CAEBR	Hypothetical protein CBG10970 (Fragment)	9.8
CD137726
SMLA53G03	Q46984_ECOLI	Hypothetical 4-hydroxyphenylacetate permease (HpaX)	4.3	Q31SY9_SHIBO	Putative 4-hydroxyphenylacetate permease	4.3	Q3YU44_SHISS	Putative 4-hydroxyphenylacetate permease	5.6	Q7N7X0_PHOLL	4-hydroxyphenylacetate permease	7.3	Q6BN52_DEBHA	Similarities with CA6066|CaCDR1 Candida albicans CaCDR1 multidrug resistance pr	7.3
CONTIG7065	Q5DDI3_SCHJA	SJCHGC05532 protein	4.00E-38	Q8T4F7_DROME	SD08336p	0.01	Q5BVQ1_SCHJA	SJCHGC06095 protein (Fragment)	0.014	Q9V8R3_DROME	CG15112-PA, isoform A (Cg15112-pc, isoform c)	0.023	Q8MMB3_DROME	CG15112-PB, isoform B	0.023
Contig501		UNKNOWN 268 POSSIBLE ANTISENSE	OM0023358-AOP
CONTIG7068	Q9W7R9_CYNPY	Alpha1 type II collagen	5.00E-36	Q59GD4_HUMAN	Collagen, type V, alpha 3 preproprotein variant (Fragment)	2.00E-35	Q8NFW1_HUMAN	Alpha 1 type XXII collagen	2.00E-35	CO5A3_HUMAN	Collagen alpha 3(V) chain precursor	2.00E-35	Q59IP1_PIG	Procollagen alpha 3(V) precursor	2.00E-35
CD160577	Q4UCV1_THEAN	Hypothetical protein	1.7	Q4UJ54_THEAN	Hypothetical protein	4.9	Q6NNN1_ARATH	At1g56060	8.4
CD144980	Q32NQ7_XENLA	Hypothetical protein	2.00E-09	Q4RVL5_TETNG	Chromosome 15 SCAF14992, whole genome shotgun sequence. (Fragment)	0.029	Q9W3W6_DROME	CG14438-PA, isoform A (Cg14438-pb, isoform b)	0.32	Q40AA3_9RHOB	NUDIX hydrolase	0.72	Q17912_CAEEL	Hypothetical protein	2.1
CF493148	Q6IFU3_SCHMA	Pol polyprotein (Fragment)	8.00E-21	Q68NI0_SCHMA	Polyprotein (Fragment)	1.00E-20	Q5BRL7_SCHJA	SJCHGC07844 protein (Fragment)	2.00E-19	O18520_SCHMA	Pol (Fragment)	4.00E-19	O18521_SCHMA	Pol (Fragment)	7.00E-17
Contig3517		SIMILAR TO L1MD-A13 REPETITIVE SEQUENCE (2E-28) POSSIBLE ANTISENSE	OM0023361-AOP
SMLA54C08	Q6XM06_9PHYC	FirrV-1-B30 precursor	5.8	YAGG_SCHPO	Hypothetical protein C12G12.16c in chromosome I	5.8
CD090862	ENV_SIVM1	Envelope polyprotein GP160 precursor [Contains: Exterior membrane glycoprotein (	2.6	Q699N1_SCHGA	NADH dehydrogenase subunit 4	5.8	Q8YK83_ANASP	Alr8034 protein	9.8
CD087524	Q6AA53_PROAC	Glycosyl hydrolase, putative alpha-L-fucosidase	2.00E-58	Q64PP0_BACFR	Probable alpha-L-fucosidase	1.00E-08	Q5L9F5_BACFN	Putative exporte hydrolase	1.00E-08	Q8XNK9_CLOPE	Probable glycosyl hydrolase	5.00E-06	Q43W00_SOLUS	Alpha-L-fucosidase precursor (EC 3.2.1.51)	4.00E-05
Contig4085		UNKNOWN 2607	OM0023392-AOP
CD189951	Q63JA5_BURPS	Putative non-ribosomal peptide synthase related protein	3.4	Q3JK48_BURPS	BarB2	3.4	Q86K17_DICDI	Hypothetical protein	5.8	Q5FL95_LACAC	Hypothetical protein	7.5	Q9FAT0_VIBPA	NikB	7.5
CD197280
CD160685	Q4SDD4_TETNG	Chromosome 3 SCAF14639, whole genome shotgun sequence	3.4	Q36UE4_MARHY	Phospholipase D/Transphosphatidylase precursor	3.4	Q4UDF8_THEAN	Replication factor-a protein 1, putative	3.4	Q3K8P3_PSEFL	KDPG and KHG aldolase	5.9	Q4WNU2_ASPFU	UBX domain protein, putative	5.9
CD082929
CD194088	Q40MA1_DESAC	Helix-turn-helix motif precursor (Fragment)	7.6
CD201775	Q6F1P7_MESFL	Hypothetical protein	1.9	Q582K1_9TRYP	Hypothetical protein	7.1	Q4HTQ3_CAMUP	Queuine tRNA-ribosyltransferase (EC 2.4.2.29)	9.3
CD139007	Q3XQ49_9PROT	Nitrogen fixation protein FixG	7.5
Contig2335		UNKNOWN 1191	OM0023342-AOP
CD060926	Q30KW9_SCHMA	Reverse transcriptase SR3-right (Fragment)	5.00E-05	Q30KX0_SCHMA	Reverse transcriptase SR3-left (Fragment)	2.00E-04	Q4QQE8_SCHMA	Endonuclease-reverse transcriptase	0.18	Q5BSE4_SCHJA	SJCHGC04778 protein (Fragment)	0.69	Q5BT64_SCHJA	SJCHGC02633 protein (Fragment)	0.9
CD161256	Q70GY1_FOWPV	A14L IMV membrane protein p16 orthologue	9.9	V179_FOWPV	Virion envelope protein FPV179	9.9
CONTIG12591	Q4QQD9_SCHMA	Reverse transcriptase (Fragment)	2.00E-24	Q3XU15_9PROT	Q3XU15_9PROT	28.9 (63), Expect(2) = 6.5	Q75IL4_ORYSA	Hypothetical protein P0683F12.15	6.6
CONTIG3900	Q8TA74_HEMPU	Ryanodine receptor	1.00E-18	RY44_DROME	Ryanodine receptor 44F	9.00E-18	Q60WP5_CAEBR	Hypothetical protein CBG19042	1.00E-17	Q7PMK5_ANOGA	ENSANGP00000019607	2.00E-17	Q7PJQ9_ANOGA	ENSANGP00000023306	2.00E-17
SMLA39G11	Q6P8B8_XENTR	Secreted frizzled-related protein 2 (Sfrp2)	3.00E-30	Q7ZXM6_XENLA	Sfrp2-prov protein	1.00E-29	SFRP2_CHICK	Secreted frizzled-related protein 2 precursor (sFRP-2)	1.00E-29	Q9BG86_RABIT	Secreted frizzled-related protein 2 (Fragment)	2.00E-28	SFRP2_HUMAN	Secreted frizzled-related protein 2 precursor (sFRP-2) (Secreted apoptosis-relat	2.00E-28
CD164521	Q6F1T9_MESFL	Threonyl-tRNA synthetase	0.81	Q6Z4Z6_ORYSA	Hydroxyproline-rich glycoprotein-like protein	2.4	Q6UU82_ORYSA	Hypothetical protein	2.4	Q82FA0_STRAW	Putative 3-hydroxyacyl-CoA dehydrogenase	3.1	Q50TE3_ENTHI	CXXC-rich protein	4
CONTIG12631	Q4QQE8_SCHMA	Endonuclease-reverse transcriptase	3.00E-36	Q30KX0_SCHMA	Reverse transcriptase SR3-left (Fragment)	1.00E-34	Q30KW9_SCHMA	Reverse transcriptase SR3-right (Fragment)	2.00E-34	Q5DEY9_SCHJA	SJCHGC02887 protein	1.00E-20	Q5BRY6_SCHJA	SJCHGC07009 protein (Fragment)	1.00E-11
CD098229	Q6ZSV2_HUMAN	Hypothetical protein FLJ45189	3.00E-08	ALU6_HUMAN	Alu subfamily SP sequence contamination warning entry	4.00E-08	Q6ZU61_HUMAN	Hypothetical protein FLJ43977	8.00E-08	Q56VN4_HUMAN	PDZ and LIM domain 5	8.00E-08	Q8N7U6_HUMAN	Hypothetical protein FLJ40325	1.00E-07
CD066014	Q847P1_ASTYP	Nef attachable protein	3.00E-15	Q847P2_ASTYP	Hypothetical protein (Fragment)	1.00E-10	Q9P2Y3_HUMAN	Nef attachable protein	5.00E-04
CF497402
SMLC18D10	Q4SZ71_TETNG	Chromosome undetermined SCAF11805, whole genome shotgun sequence	6.2
Contig2206		UNKNOWN 1092	OM0023343-AOP
Contig360		UNKNOWN 190	OM0023368-AOP	hypothetical	hypothetical
CD125143	Q6FAR5_ACIAD	Hypothetical protein	2.00E-06	Q5E4W3_VIBF1	Hypothetical protein	9.00E-06	Q9KVL0_VIBCH	Hypothetical protein VC0132	2.00E-05	Q43EW7_9CHLB	Hypothetical protein	2.00E-05	Q87KK0_VIBPA	Hypothetical protein VP2977	8.00E-05
Contig4215		UNKNOWN 2676	OM0023400-AOP
CD083324
CD123312	Q5DCR8_SCHJA	SJCHGC05717 protein	4.00E-11	Q55CU8_DICDI	Random slug cDNA5 protein	4.00E-05	O15915_DICDI	Random slug cDNA5 protein	4.00E-05	Q5WMM0_ORYSA	Hypothetical protein OSJNBa0034K10.5	2.00E-04	Q60DZ6_ORYSA	Hypothetical protein OSJNBa0010H19.12	7.00E-04
CONTIG11104	Q4QQF8_SCHMA	Pol polyprotein	2.00E-64	Q9BM81_CLOSI	Gag-pol polyprotein	2.00E-44	Q9BM79_CLOSI	Gag-pol polyprotein	7.00E-44	Q6IFT8_SCHMA	Pol polyprotein	2.00E-43	Q9BM80_CLOSI	Gag-pol polyprotein	6.00E-43
CD086464	Q5DB15_SCHJA	SJCHGC06426 protein	2.00E-04	Q4YAV2_PLABE	Heat shock protein 86 family protein, putative	0.52	Q7REJ8_PLAYO	O1, putative	0.68	Q63ZG9_XENLA	LOC494831 protein	4.4	Q8F1H9_LEPIN	Putative flavin-containing monooxygenase	4.4
Contig3357		UNKNOWN 2055	OM0023364-AOP
>CL536	Q5C542_SCHJA	SJCHGC03492 protein (Fragment)	2.00E-52	Q7QD06_ANOGA	ENSANGP00000018709 (Fragment)	1.00E-20	Q6AWM9_DROME	RE39088p (Fragment)	4.00E-19	Q9GQN4_DROME	PASILLA splice variant 3 (CG8144-PA, isoform A)	4.00E-19	Q9GQN3_DROME	PASILLA splice variant 4 (CG8144-PC, isoform C)	4.00E-19
CONTIG10916	Q6ZSN0_HUMAN	Hypothetical protein FLJ45357	3.00E-19	Q4R5J6_MACFA	Brain cDNA, clone: QflA-12119, similar to human hypothetical protein FLJ20344 (F	8.00E-18	Q8NAI3_HUMAN	Hypothetical protein FLJ35322	1.00E-17	Q8N2I3_HUMAN	CDNA FLJ90761 fis, clone THYRO1000099	3.00E-17	Q6ZVX8_HUMAN	Hypothetical protein FLJ41941	3.00E-17
CONTIG8733	Q8SEZ0_RAT	NADH dehydrogenase subunit 5	e-137	NU5M_RAT	NADH-ubiquinone oxidoreductase chain 5 (EC 1.6.5.3) (NADH dehydrogenase subunit	e-134	Q953H1_VOLKI	NADH dehydrogenase subunit 5	e-133	Q9MD82_MOUSE	NADH dehydrogenase subunit 5 (EC 1.6.5.3) (10 days neonate medulla oblongata cD	e-131	Q4JFM6_MOUSE	NADH dehydrogenase subunit 5 (EC 1.6.5.3)	e-131
CF502887	Q9W709_PLEPL	Transposase	5.00E-05	Q9PW00_PLEPL	Transposase	5.00E-05	Q5C398_SCHJA	SJCHGC09533 protein (Fragment)	3.00E-04	Q98TI8_PLEPL	Putative transposase	4.00E-04	Q6X1Z4_RANPI	Transposase	4.00E-04
SMLC1D10	Q5D9R3_SCHJA	SJCHGC09402 protein	1.00E-91	Q9VBF9_DROME	CG6036-PA	5.00E-51	Q99ND8_RAT	Protein phosphatase 1B2 53 kDa isoform (Ppm1b protein)	2.00E-50	Q642F2_RAT	Ppm1b protein	2.00E-50	Q546R0_RAT	Protein phosphatase 1B1 43 kDa isoform	2.00E-50
CONTIG1372	Q9VCX8_DROME	CG31158-PA, isoform A	4.00E-39	Q86B81_DROME	CG31158-PB, isoform B	4.00E-39	Q8MRV5_DROME	SD20094p	4.00E-39	Q7QE87_ANOGA	ENSANGP00000017447 (Fragment)	3.00E-38	Q4S8L6_TETNG	Chromosome 2 SCAF14705, whole genome shotgun sequence	5.00E-38
Contig3609		SIMILAR TO REVERSE TRANSCRIPTASE (2E-32)	OM0023368-AOP
CD091773
CD136021	Q802W7_BRARE	Splicing factor 3b, subunit 3	9.00E-54	Q7Q722_ANOGA	ENSANGP00000017759	8.00E-53	Q5ZI54_CHICK	Hypothetical protein	2.00E-52	Q921M3_MOUSE	Splicing factor 3b, subunit 3, 130kDa (2 days neonate thymus thymic cells cDNA,	2.00E-52	Q8BUD9_MOUSE	10 days lactation, adult female mammary gland cDNA, RIKEN full-length enriched l	2.00E-52
CD169665
Contig1752		SIMILAR TO HYPOTHETICAL PROTEIN CG11985 (3E-24)	OM0023329-AOP
CD134276	Q8LYD0_CERCO	NADH dehydrogenase 1 (Fragment)	0.31	Q8LYC9_CERCO	NADH dehydrogenase 1 (Fragment)	0.31	Q60WQ4_CAEBR	Hypothetical protein CBG19031	0.89	Q9XMN3_CERCA	NADH-ubiquinone oxidoreductase chain 1 (EC 1.6.5.3) (NADH dehydrogenase subunit	3.4	Q8LYD1_CERCA	NADH dehydrogenase 1 (Fragment)	3.4
CONTIG10109	Q7Q282_ANOGA	ENSANGP00000014198 (Fragment)	1.00E-22	Q803B4_BRARE	Follicular lymphoma variant translocation 1	9.00E-22	FVT1_HUMAN	3-ketodihydrosphingosine reductase precursor (EC 1.1.1.102) (3-dehydrosphinganin	8.00E-20	Q3TDR0_MOUSE	NOD-derived CD11c +ve dendritic cells cDNA, RIKEN full-length enriched library,	1.00E-19	Q8CII3_MOUSE	Fvt1 protein	1.00E-19
>CL528	Q5DU56_MOUSE	MFLJ00348 protein (Fragment)	3.00E-06	Q6QI94_RAT	LRRG00114 (LRRGT00001)	0.085	Q3LVI1_TAROF	TO71-3 (Fragment)	2.7	Q6NZS8_BRARE	Vangl2 protein	6.1
SMLA63D01	Q5DED2_SCHJA	SJCHGC02251 protein	2.00E-14	Q5DDH7_SCHJA	Hypothetical protein	2.00E-14	Q6PP05_MIRJA	Putative universal stress protein (Fragment)	1.00E-07	Q5DH64_SCHJA	SJCHGC06881 protein	5.00E-07	Q5DGI9_SCHJA	SJCHGC01867 protein	5.00E-07
CD085624	Q6IFU2_SCHMA	Pol polyprotein	0.001	Q4QQE0_SCHMA	Endonuclease-reverse transcriptase	3.6	Q4F8Q1_CAEBR	Reverse transcriptase	3.6	O77146_SCHJA	Reverse transcriptase SjR1 (Fragment)	7.9
Contig5949		UNKNOWN 3538	OM0023348-AOP
CD186605	Q6FML7_CANGA	Similar to sp|P38140 Saccharomyces cerevisiae YBR239c	2	Q9VD05_DROME	CG31160-PA	3.4	Q80BL9_9GAMA	RRlarge	4.4	RIR1_SHV21	Ribonucleoside-diphosphate reductase large chain (EC 1.17.4.1) (Ribonucleotide r	4.4	Q7YTX4_DROME	AT19280p	7.5
CD128798	Q4TT96_CAEEL	Serpentine receptor, class h protein 76, isoform b	8.9
CONTIG3866	Q7PSH4_ANOGA	ENSANGP00000012507	2.00E-98	Q6NNX2_DROME	AT24411p (Fragment)	2.00E-98	SPTCB_DROME	Spectrin beta chain	2.00E-98	Q961X7_BRUMA	Beta-G spectrin	3.00E-93	Q53R99_HUMAN	Hypothetical protein SPTBN1 (Fragment)	3.00E-91
CONTIG7799	Q6ZSB2_HUMAN	Hypothetical protein FLJ45676	2.00E-04	O94854_HUMAN	KIAA0754 protein (Fragment)	2.00E-04	YSW3_CAEEL	Hypothetical protein T25D10.3 in chromosome II precursor	0.006	Q4T894_TETNG	Chromosome undetermined SCAF7860, whole genome shotgun sequence. (Fragment)	0.18	Q4K796_PSEF5	Hypothetical protein	0.23
CONTIG5003	Q7VHG9_HELHP	Cytochrome c biogenesis protein	7.5
CD178485
CONTIG8233	Q4SNH4_TETNG	Chromosome 8 SCAF14543, whole genome shotgun sequence. (Fragment)	8.00E-80	Q5U5C2_XENLA	LOC495303 protein	2.00E-79	Q5BLI2_BRARE	Vars protein (Fragment)	3.00E-78	Q3U3D3_MOUSE	NOD-derived CD11c +ve dendritic cells cDNA, RIKEN full-length enriched library,	1.00E-77	Q3TII4_MOUSE	CRL-1722 L5178Y-R cDNA, RIKEN full-length enriched library, clone:I730032G03 pro	1.00E-77
CD118709
CD090426	Q3UMK5_MOUSE	Lung RCB-0558 LLC cDNA, RIKEN full-length enriched library, clone:G730040M05 pro	2.6	Q3UMA0_MOUSE	Mammary gland RCB-0526 Jyg-MC(A) cDNA, RIKEN full-length enriched library, clone	2.6	Q7TMU4_MOUSE	Fos-like antigen 1	2.6	Q4V8K7_RAT	Fos-like antigen 1	2.6	FOSL1_RAT	Fos-related antigen 1 (FRA-1)	2.6
CD116610
CD135591	Q4NRP3_9DELT	HNH nuclease	0.3	Q8NKV6_ACIAM	Membrane-bound NiFe hydrogenase precursor	0.88	Q4TGC7_TETNG	Chromosome undetermined SCAF3785, whole genome shotgun sequence. (Fragment)	1.5	Q3MIR4_HUMAN	Hypothetical protein	2	Q9REL1_9MICC	RecA protein (Fragment)	2.6
CONTIG12990	PPAC_DEIRA	Probable manganese-dependent inorganic pyrophosphatase (EC 3.6.1.1) (Pyrophospha	0.21	Q6BJD3_DEBHA	Similar to CA1030|CaZRC1 Candida albicans CaZRC1 Zinc and cadmium resistance pro	0.36	Q7Y8F8_9EUTH	NADH dehydrogenase subunit 5	1.4	Q5CR38_CRYPV	Hypothetical protein	2.3	Q7YYX2_CRYPV	Zinc protease, possible	2.3
Contig5197		UNKNOWN 3042	OM0023332-AOP
Contig3407		UNKNOWN 2098	OM0023364-AOP	unnamed protein product [Mus musculus]	unnamed protein product [Mus musculus]
CD200521	Q17666_CAEEL	Hypothetical protein	5.7
CD153774	Q3UIZ0_MOUSE	17 days pregnant adult female amnion cDNA, RIKEN full-length enriched library, c	1.00E-43	GAK_MOUSE	Cyclin G-associated kinase (EC 2.7.1.-)	1.00E-43	GAK_RAT	Cyclin G-associated kinase (EC 2.7.1.-)	1.00E-43	GAK_HUMAN	Cyclin G-associated kinase (EC 2.7.1.-)	8.00E-42	Q5RDC0_PONPY	Hypothetical protein DKFZp469F1313	3.00E-41
CONTIG10163	Q5C3C6_SCHJA	SJCHGC03094 protein (Fragment)	1.00E-04	Q5BSN8_SCHJA	SJCHGC03699 protein	5.00E-04	Q3KTD5_SCHJA	SJCHGC09844 protein (Fragment)	8.00E-04	Q8T5G5_SCHJA	Polyprotein	0.001	Q5BSH2_SCHJA	SJCHGC04297 protein (Fragment)	0.035
SMLC3F04	Q4DB73_TRYCR	Mucin TcMUCI, putative	0.3	Q5V8A3_SACBA	SED1-2 (Fragment)	0.68	Q4CTF6_TRYCR	Mucin TcMUCI, putative	1.2	O76894_DROME	CG14796-PA (EG:56G7.1 protein)	1.2	O44626_CAEEL	Coexpressed with polycystins protein 4	1.2
CD095594
CD150579	P73135_SYNY3	Slr1024 protein	9.2
CD087016	Q7R1M3_GIALA	GLP_28_55053_59060	7.6
CD069221	Q3AU35_9CHLB	Glycosyl transferase	0.68	NUON_RICPR	NADH-quinone oxidoreductase chain N (EC 1.6.99.5) (NADH dehydrogenase I, chain N	1.5	P91193_CAEEL	Hypothetical protein D2092.5	2	Q9G924_OCHDN	NADH dehydrogenase subunit 5 (EC 1.6.5.3)	2.6	Q68WJ7_RICTY	NADH dehydrogenase (Ubiquinone) subunit N (EC 1.6.5.3)	3.4
Contig3670		UNKNOWN 2330	OM0023368-AOP
CD160642	Q60ZD4_CAEBR	Hypothetical protein CBG17867	1	Q7Q7C3_ANOGA	ENSANGP00000021634 (Fragment)	4.9	Q4I6X3_GIBZE	Hypothetical protein	4.9
CD131175	Q63ZQ7_XENLA	Hypothetical protein	0.003	Q95VA9_SPIER	Cytoplasmic antigen 1 (Fragment)	0.18	Q75A86_ASHGO	ADR032Wp	0.23	Q06235_YEAST	Ylr162wp	1.2	Q60QP0_CAEBR	Hypothetical protein CBG21735	2
CD149914	Q9CPS6_MOUSE	10 day old male pancreas cDNA, RIKEN full-length enriched library, clone:1810043	4.5	Q4S4W8_TETNG	Chromosome 2 SCAF14738, whole genome shotgun sequence. (Fragment)	5.9
CONTIG8902	E2AK4_MOUSE	Eukaryotic translation initiation factor 2-alpha kinase 4 (EC 2.7.1.37) (GCN2-l	3.00E-08	E2AK4_HUMAN	Eukaryotic translation initiation factor 2-alpha kinase 4 (EC 2.7.1.37) (GCN2-l	4.00E-08	Q4RLP9_TETNG	Chromosome 10 SCAF15019, whole genome shotgun sequence. (Fragment)	6.00E-07	Q4P4B8_USTMA	Hypothetical protein	2.00E-05	Q5CI59_CRYHO	Histidyl-tRNA synthetase (EC 6.1.1.21) (Histidine--tRNA ligase) (HisRS)	2.00E-04
>CL631
Contig5117		UNKNOWN 2977	OM0023356-AOP	hypothetical	hypothetical
Contig5675		SIMILAR TO ANKYRIN 2 (ANKYRIN B) 2E-20 POSSIBLE ANTISENSE	OM0023349-AOP
CD147626	Q3CQR7_ALTAT	GGDEF	2	Q8IM39_PLAF7	Hypothetical protein	4.4	Q54YW1_DICDI	Hypothetical protein	4.4	Q8IKT6_PLAF7	Serine/threonine-protein kinase	5.8	Q26018_PLAFA	Serine/threonine-protein kinase	5.8
CONTIG10868	O76213_SCHMA	Reverse transcriptase (Fragment)	8.00E-32	Q5C394_SCHJA	SJCHGC09145 protein (Fragment)	9.00E-20	Q8T5G5_SCHJA	Polyprotein	4.00E-19	Q8MWP9_SCHJA	Polyprotein (Fragment)	4.00E-19	Q5D8K5_SCHJA	SJCHGC02198 protein	8.00E-19
Contig407		UNKNOWN 223	OM0023392-AOP	Probable Bax inhibitor-1 (BI-1) (sp|BI1_PAROL)	Probable Bax inhibitor-1 (BI-1) (sp|BI1_PAROL)
SMLC20B05	Q5BXW2_SCHJA	SJCHGC01957 protein (Fragment)	0.43	Q5C113_SCHJA	SJCHGC03128 protein (Fragment)	0.56	Q55A45_DICDI	Hypothetical protein	0.73	Q86KZ7_DICDI	Hypothetical protein	0.73	Q5BWU8_SCHJA	SJCHGC01965 protein (Fragment)	6.2
CF496361	Q5M121_STRT1	Acetylglutamate kinase	7.5	Q5AHB7_CANAL	Hypothetical protein SHE4	7.5	Q6MUL8_MYCMS	Ribose/Galactose ABC transporter, ATP-binding component	9.8
CD090829	Q8ET28_OCEIH	Hypothetical conserved protein	5.00E-20	Q65MF4_BACLD	Hypothetical protein (Conserved protein YfkA)	9.00E-20	O34868_BACSU	YfkB protein	1.00E-19	Q9KEG3_BACHD	BH0889 protein	6.00E-19	Q5L2X0_GEOKA	Hypothetical conserved protein	6.00E-19
CD130737
Contig2905		UNKNOWN 1671	OM0023397-AOP
CD198329	Q4C904_CROWT	Leucine-rich repeat precursor	4.5	Q55B94_DICDI	Hypothetical protein	4.5	Q55B86_DICDI	Hypothetical protein	5.9	Q55B56_DICDI	Hypothetical protein	7.7	Q8IBR4_PLAF7	Hypothetical protein PF07_0075	7.7
CD124735	Q5BDQ1_EMENI	Hypothetical protein	2	Q6FKV4_CANGA	Similar to sp|P40462 Saccharomyces cerevisiae YIL137c	9.9
SMLC22B06	Q4FWW2_LEIMA	Metacaspase, putative	3.1
Contig2899		UNKNOWN 1666	OM0023397-AOP
CD065272	Q4Y6B1_PLACH	Hypothetical protein	0.81	Q5C584_SCHJA	SJCHGC08257 protein (Fragment)	3.1	Q5CQR3_CRYPV	Domain similar to KOG0260, KOG1984, KOG1999, repeats; identical to cryptosporid	4
CD079832	Q5DBH2_SCHJA	SJCHGC05484 protein	2.00E-43	MGDP1_MOUSE	Magnesium-dependent phosphatase 1 (EC 3.1.3.-) (EC 3.1.3.48) (MDP-1)	1.00E-15	MGDP1_HUMAN	Magnesium-dependent phosphatase 1 (EC 3.1.3.-) (EC 3.1.3.48) (MDP-1)	3.00E-15	Q4PHT9_USTMA	Hypothetical protein	5.00E-14	Q4ICS2_GIBZE	Hypothetical protein	5.00E-14
CD150567	Q4S201_TETNG	Chromosome undetermined SCAF14764, whole genome shotgun sequence. (Fragment)	1.5	Q302W4_STRSU	Hypothetical protein	1.5	Q817Z9_BACCR	Hypothetical protein	2	Q3LHL9_DROME	Winged eye	2.6	Q8IJJ6_PLAF7	Hypothetical protein	2.6
Contig3324		UNKNOWN 2024	OM0023364-AOP
CD164663
CD076165	Q4FRT9_PSYAR	Cytochrome b, b6 subunit (EC 1.10.2.2)	0.53	Q3GMQ8_9GAMM	Cytochrome b/b6, N-terminal:Cytochrome b/b6, C-terminal precursor	0.53	Q6YY06_ORYSA	Hypothetical protein OSJNBb0056I22.46 (Hypothetical protein OSJNBb0046O12.6)	4.5	Q7S9Z8_NEUCR	Hypothetical protein	4.5	Q6G5B8_BARHE	Hypothetical protein	5.9
SMLC24G10	Q9VP06_DROME	CG11306-PA (HL02815p) (RE27026p)	1.00E-24	Q5R7Z6_PONPY	Hypothetical protein DKFZp469C0920	1.00E-23	Q5TAN9_HUMAN	KIAA0266 protein	1.00E-23	Q96FI7_HUMAN	LOC440138 protein (Fragment)	1.00E-21	Q7ZW24_BRARE	LOC407614 protein (Fragment)	3.00E-21
CONTIG10315	Q6CL88_KLULA	Kluyveromyces lactis strain NRRL Y-1140 chromosome F of strain NRRL Y-1140 of Kl	5.8	Q4EBC9_9RICK	Preprotein translocase, SecA subunit	7.6
CD166753	Q6IFU2_SCHMA	Pol polyprotein	5.9
CONTIG12391	Q6IAE4_HUMAN	LMO6 protein	5.6	Q53XR5_HUMAN	LIM domain only 6	5.6	SLD2_YEAST	DNA replication regulator SLD2 (DNA replication and checkpoint protein 1)	5.6	LMO6_HUMAN	LIM domain only protein 6 (Triple LIM domain protein 6)	5.6	Q835V3_ENTFA	Cell wall surface anchor family protein	7.3
CONTIG8013	Q4KF17_PSEF5	HlyD family secretion protein	6.00E-43	Q3KF36_PSEFL	Secretion protein HlyD	1.00E-39	Q88LF7_PSEPK	HlyD family secretion protein	3.00E-38	Q9HZ89_PSEAE	Probable secretion protein	5.00E-36	Q3KF37_PSEFL	Drug resistance transporter EmrB/QacA subfamily	6.00E-32
CD195060	Q8T5G5_SCHJA	Polyprotein	4.00E-39	Q8MWP9_SCHJA	Polyprotein (Fragment)	4.00E-39	Q5DBA5_SCHJA	SJCHGC09144 protein	4.00E-37	Q5BSC9_SCHJA	SJCHGC05010 protein (Fragment)	2.00E-34	Q5BSF5_SCHJA	SJCHGC04561 protein (Fragment)	1.00E-20
CD168960	Q7MWZ1_PORGI	Polysaccharide export protein, BexD/CtrA/VexA family	2.00E-21	Q8AA52_BACTN	Putative membrane protein involved in polysaccharide export	7.00E-20	Q8AAR6_BACTN	Polysaccharide export outer membrane protein	2.00E-19	Q8AAI3_BACTN	Polysaccharide export outer membrane protein	3.00E-19	Q64SL1_BACFR	Polysaccharide export outer membrane protein	1.00E-17
CD098286	Q3JK32_BURPS	Putative glycosyltransferase	0.14	Q3W9B5_9ACTO	Hydrogenase maturation protein HypF	1.2	O45469_CAEEL	Hypothetical protein	1.2	Q7NJU7_GLOVI	Gll1735 protein	2	Q688G9_ORYSA	Hypothetical protein OSJNBa0039A21.3	2
CD112148	Q5BSG6_SCHJA	SJCHGC04354 protein (Fragment)	2.00E-23	Q8T5G5_SCHJA	Polyprotein	4.00E-21	Q8MWP9_SCHJA	Polyprotein (Fragment)	4.00E-21	Q3MJT3_SCHJA	SJCHGC05140 protein	2.00E-20	Q8MWP8_SCHJA	Polyprotein (Fragment)	2.00E-20
AI975727	Q3IKG0_PSEHT	Putative membrane protein with ankyrin repeat	5.8	Q6FSZ6_CANGA	Similar to sp|P50944 Saccharomyces cerevisiae YNL101w	9.8
CD093158	Q3V028_MOUSE	11 days pregnant adult female ovary and uterus cDNA, RIKEN full-length enriched	2.6	Q3TJI3_MOUSE	14 days embryo liver cDNA, RIKEN full-length enriched library, clone:I530012N03	2.6	CYLD_MOUSE	Probable ubiquitin carboxyl-terminal hydrolase CYLD (EC 3.1.2.15) (Ubiquitin thi	2.6	Q66H62_RAT	Rp1_predicted protein	4.5	DNMT1_RAT	DNA (cytosine-5)-methyltransferase 1 (EC 2.1.1.37) (Dnmt1) (DNA methyltransfera	5.9
SMLA21C04	Q6F1D9_MESFL	Hypothetical protein	8.9
Contig4924		UNKNOWN 2799	OM0023363-AOP
CONTIG4163	Q6KC55_MEGCR	Keyhole limpet hemocyanin2	4.4
CD195938	Q54DG3_DICDI	Hypothetical protein	0.001	Q54I66_DICDI	Hypothetical protein	0.004	Q55F14_DICDI	Hypothetical protein	0.006	Q55FL8_DICDI	Hypothetical protein	0.01	Q559T8_DICDI	Putative AGC family protein kinase	0.012
CONTIG7831
CD125727	Q5F8G4_NEIG1	Hypothetical protein	7.5	Q7BNE7_LACRE	Replication initiation protein (Replicaiton initiation protein)	9.8	Q48548_LACFE	Rep	9.8
CONTIG11665	Q5DGI7_SCHJA	SJCHGC02838 protein	0	Q55CF6_DICDI	Hypothetical protein	1.00E-50	Q6L6S1_HYDMA	Endoglycoceramidase	8.00E-49	Q9GV16_CYANO	Endoglycoceramidase (EC 3.2.1.123)	3.00E-47	Q9GV15_CYANO	Endoglycoceramidase (EC 3.2.1.123)	1.00E-46
CF502359	O76213_SCHMA	Reverse transcriptase (Fragment)	9.00E-07	Q5C387_SCHJA	SJCHGC03776 protein (Fragment)	9.00E-06	Q5C3C1_SCHJA	SJCHGC04023 protein (Fragment)	1.00E-04	Q8T5G5_SCHJA	Polyprotein	0.002	Q8MWP9_SCHJA	Polyprotein (Fragment)	0.002

## Sheet: 188 male dual
																	GoBLET Identifiers
Common	hit1id_lrge	hit1name_lrge	hit1evalue	hit2id	hit2name	hit2evalue	hit3id	hit3name	hit3evalue	hit4id	hit4name	hit4evalue	hit5id	hit5name	hit5evalue	Cellular Component	Molecular Function	Biological Process
CONTIG6907	Q7PYA6_ANOGA	ENSANGP00000018413 (Fragment)	2.00E-10	Q9W4E1_DROME	CG15786-PA	1.00E-09	Q8MS32_DROME	RE24790p	1.00E-09	Q7PY19_ANOGA	ENSANGP00000011567 (Fragment)	4.00E-09	Q7PLR0_DROME	CG41136-PA	4.00E-08	virion GO:0019012
CONTIG6654	Q4CPX4_TRYCR	Hypothetical protein	0.14	Q4CUQ4_TRYCR	Hypothetical protein	1.5	Q4Q717_LEIMA	Hypothetical protein	3.4	Q58CK9_DROME	RE49242p	7.6
CD138125	Q5KTT0_PAGMA	Deoxyribonuclease I	3.00E-20	DNAS1_OREMO	Deoxyribonuclease-1 precursor (EC 3.1.21.1) (Deoxyribonuclease I) (DNase I)	2.00E-19	Q4SBB2_TETNG	Chromosome undetermined SCAF14676, whole genome shotgun sequence	1.00E-18	Q5KTT1_ANGJA	Deoxyribonuclease I	1.00E-18	Q8JIP7_CYPCA	DNase I	6.00E-17
CONTIG3455	Q4G2I4_PAXIN	Mitochondrial carrier protein	3.00E-87	Q4DJJ9_TRYCR	Mitochondrial phosphate transporter, putative	2.00E-84	Q38DX9_9TRYP	Mitochondrial carrier protein, putative	3.00E-84	Q4FW27_LEIMA	Mitochondrial phosphate transporter, putative	2.00E-83	Q4FW26_LEIMA	Mitochondrial phosphate transporter, putative	1.00E-82	cell GO:0005623	catalytic activity GO:0003824,binding GO:0005488	physiological process GO:0007582, cellular process GO:0009987
CD090576	Q4R4P1_MACFA	Brain cDNA, clone: QtrA-10430, similar to human heat shock 90kDa protein 1, alp	5.00E-54	Q76LV2_BOVIN	90-kDa heat shock protein alpha	5.00E-54	Q96HX7_HUMAN	HSPCA protein (Fragment)	5.00E-54	Q8TBA7_HUMAN	HSPCA protein (Fragment)	5.00E-54	Q5CAQ7_HUMAN	Heat shock protein HSP 90-alpha 2	5.00E-54		catalytic activity GO:0003824, binding GO:0005488	physiological process GO:0007582, cellular process GO:0009987, response to stimulus GO:0050793
CONTIG6521	Q5UAT6_BOMMO	Ribosomal protein L5	2.00E-41	RL5_BOMMO	60S ribosomal protein L5	9.00E-41	Q56FG6_9HYME	Ribosomal protein L5	3.00E-40	Q86LY6_BRALA	Ribosomal protein L5 (Fragment)	7.00E-40	Q4GXN2_CARGR	Ribosomal protein L5e (Fragment)	2.00E-39	cell GO:0005623, organelle GO:0043226, protein complex GO:0043234	catalytic activity GO:0003824,structural molecule activity GO:0005198, binding GO:0005488	physiological process GO:0007582, cellular process GO:0009987
CD137664	Q86LZ6_HETGL	Intermediate filament protein HG-IF1	7.00E-09	Q25388_LOLPE	Neurofilament protein	7.00E-09	NF70_LOLPE	70 kDa neurofilament protein (NF70)	7.00E-09	NF60_LOLPE	60 kDa neurofilament protein (NF60)	7.00E-09	O97348_9TURB	Cytoplasmic intermediate filament protein (Fragment)	1.00E-07
CONTIG3854	Q7ZUF5_BRARE	Transmembrane 9 superfamily member 2	4.00E-30	Q7PMH7_ANOGA	ENSANGP00000013187 (Fragment)	6.00E-29	Q5U4N1_XENLA	LOC495462 protein	8.00E-29	Q4RP58_TETNG	Chromosome 1 SCAF15008, whole genome shotgun sequence. (Fragment)	1.00E-27	Q4R3M9_MACFA	Testis cDNA clone: QtsA-15827, similar to human transmembrane 9 superfamily memb	1.00E-27	cell GO:0005623	catalytic activity GO:0003824, transporter activity GO:0005215	physiological process GO:0007582, cellular process GO:0009987
CONTIG6590	O01404_DROME	Peptidylglycine alpha-hydroxylating monooxygenase (EC 1.14.17.3) (GH12243p) (CG3	1.00E-39	Q60PL5_CAEBR	Hypothetical protein CBG22199	8.00E-37	Q7QJC8_ANOGA	ENSANGP00000019087 (Fragment)	2.00E-36	Q95XM2_CAEEL	Hypothetical protein	3.00E-36	Q4W7B5_DUGJA	Peptidylglycine a-hydroxylating monooxygenase	2.00E-31	cell GO:0005623	catalytic activity GO:0003824, binding GO:0005488	physiological process GO:0007582, cellular process GO:0009987
CD085980	Q4D6U4_TRYCR	Hypothetical protein	2.6	Q44G92_CHRSL	Fumarylacetoacetate (FAA) hydrolase	10
CONTIG6310	Q9S596_MYXXA	Penicillin-resistant DD-carboxypeptidase	4.00E-04	Q3TCE2_MOUSE	NOD-derived CD11c +ve dendritic cells cDNA, RIKEN full-length enriched library,	0.088	Q2Z6E4_9GAMM	D-alanyl-D-alanine carboxypeptidase-related protein	0.088	Q36AT8_9GAMM	D-alanyl-D-alanine carboxypeptidase-related protein	0.15	Q3QFQ2_9GAMM	Peptidase M15B and M15C, D,D-carboxypeptidase VanY/endolysins	0.15
CD136140	Q86GJ2_HYDAT	Cathepsin L	3.00E-45	Q6DHT0_BRARE	Hypothetical protein zgc:92089	4.00E-45	Q95V59_9DIPT	Cathepsin L-like cysteine protease	8.00E-45	CATL_SARPE	Cathepsin L precursor (EC 3.4.22.15) [Contains: Cathepsin L heavy chain; Catheps	4.00E-44	Q7YW75_9ACAR	Cathepsin L-like cysteine proteinase A	9.00E-44		catalytic activity GO:0003824	physiological process GO:0007582, cellular process GO:0009987
CD140068	Q8AVB4_9TELE	Cathepsin L (EC 3.4.22.15)	3.00E-17	Q6NYR5_BRARE	Cathepsin L, a	4.00E-17	Q75SZ8_CYPCA	Cathepsin L preproprotein	5.00E-17	Q76EL0_9TELE	Cathepsin L	1.00E-16	Q90WC2_ONCMY	Procathepsin L	8.00E-16		catalytic activity GO:0003824	physiological process GO:0007582, cellular process GO:0009987
CONTIG6788	Q8MP01_HALRO	HrDelta protein precursor	6.00E-13	Q8I498_CUPSA	Delta1 protein	1.00E-12	Q7PSV8_ANOGA	ENSANGP00000005397 (Fragment)	1.00E-12	O13149_FUGRU	Notch 2 (Fragment)	2.00E-12	Q25253_LUCCU	Notch homolog Scalloped wings	2.00E-12	cell GO:0005623, organelle GO:0043226	catalytic activity GO:0003824, signal transducer activity GO:0004871, binding GO:0005488	physiological process GO:0007582, cellular process GO:0009987, growth GO:0040007, regulation of biological process GO:0050789, response to stimulus GO:0050793
CD186595	Q7QDG9_ANOGA	ENSANGP00000000794 (Fragment)	1.00E-06	Q9VCD1_DROME	CG6129-PB, isoform B	4.00E-05	Q8IMX3_DROME	CG6129-PC, isoform C	4.00E-05	Q8MSN3_DROME	AT16851p	2.00E-04	Q8R0B9_MOUSE	Crocc protein (Fragment)	0.41
CD132866	Q6P9U4_RAT	Similar to RIKEN cDNA 2310042G06	3.00E-47	Q4R5S9_MACFA	Testis cDNA, clone: QtsA-21201, similar to human chromosome 20 open reading fram	2.00E-46	CT045_HUMAN	Protein C20orf45	3.00E-46	Q58DB0_BOVIN	CGI-107 protein (C20ORF45 protein)	3.00E-46	Q6TMK8_CRIGR	BCR/ABL-regulated protein	8.00E-46	cell GO:0005623,organelle GO:0043226	catalytic activity GO:0003824,binding GO:0005488	physiological process GO:0007582, response to stimulus GO:0050793
CONTIG3808
CD091656	Q5FWJ6_MOUSE	Heat shock protein 8 (Blastocyst blastocyst cDNA, RIKEN full-length enriched lib	2.00E-65	Q4FZY7_RAT	Heat shock protein 8	2.00E-65	Q3ULM1_MOUSE	Morula whole body morula cDNA, RIKEN full-length enriched library, clone:I0C0040	2.00E-65	Q3UGM0_MOUSE	Melanocyte cDNA, RIKEN full-length enriched library, clone:G270072A03 product:he	2.00E-65	Q3UDS0_MOUSE	Bone marrow macrophage cDNA, RIKEN full-length enriched library, clone:G530109P0	2.00E-65		catalytic activity GO:0003824, binding GO:0005488	physiological process GO:0007582, cellular process GO:0009987, response to stimulus GO:0050793
CD092117	HSP7A_DROSI	Heat shock 70 kDa protein cognate 1 (Heat shock 70 kDa protein 70C) (Fragments)	5.00E-29	Q91688_XENLA	Immunoglobulin binding protein	4.00E-28	Q6DD68_XENLA	LOC397850 protein	4.00E-28	Q75W49_CRAGI	78kDa glucose regulated protein	4.00E-28	GRP78_XENLA	78 kDa glucose-regulated protein precursor (GRP 78) (Immunoglobulin heavy chain	4.00E-28	cell GO:0005623, organelle GO:0043226	catalytic activity GO:0003824,binding GO:0005488	physiological process GO:0007582, cellular process GO:0009987,response to stimulus GO:0050793
CD140426	TNNC2_ANGAN	Troponin C, skeletal muscle (TNC)	0.048	Q7RSS0_PLAYO	Putative yir1 protein	2	Q7R8F4_PLAYO	Putative yir1 protein	4.5	Q8AUR4_XENLA	MGC52923 protein (MGC53213 protein)	5.8	Q6P8E2_XENTR	Troponin C2, fast	5.8
CD090278	Q8MVT9_STRDR	Alpha-tubulin 2 (Fragment)	1.00E-78	Q52L87_MOUSE	Tubulin, alpha 6 (Blastocyst blastocyst cDNA, RIKEN full-length enriched library	2.00E-78	Q3TIZ0_MOUSE	14 days pregnant adult female amnion cDNA, RIKEN full-length enriched library, c	2.00E-78	Q53GA7_HUMAN	Tubulin alpha 6 variant (Fragment)	2.00E-78	TBA6_RAT	Tubulin alpha-6 chain (Alpha-tubulin 6)	2.00E-78	cell GO:0005623, organelle GO:0043226, protein complex GO:0043234	catalytic activity GO:0003824, structural molecule activity GO:0005198, binding GO:0005488	physiological process GO:0007582, cellular process GO:0009987
CONTIG6697	Q5KZ64_GEOKA	Flavohemoglobin	2.00E-12	FHP_YEAST	Flavohemoprotein (Hemoglobin-like protein) (Flavohemoglobin) (Nitric oxide dioxy	1.00E-11	Q6B1W6_YEAST	YGR234W	1.00E-11	Q5WL63_BACSK	Flavohemoglobin	3.00E-11	HMP_OCEIH	Flavohemoprotein (Hemoglobin-like protein) (Flavohemoglobin) (Nitric oxide dioxy	3.00E-11
CONTIG6524	Q6PBZ2_BRARE	Ribosomal protein S26	2.00E-38	Q6P6E2_BRARE	Ribosomal protein S26	2.00E-38	Q5ZM66_CHICK	Hypothetical protein	2.00E-38	Q4LAZ8_9COLE	Ribosomal protein S26e	2.00E-38	Q90YP7_ICTPU	40S ribosomal protein S26-2	2.00E-38	cell GO:0005623, organelle GO:0043226, protein complex GO:0043234	catalytic activity GO:0003824, structural molecule activity GO:0005198	physiological process GO:0007582, cellular process GO:0009987
L78441	14332_SCHMA	14-3-3 protein homolog 2 (14-3-3-2) (Fragment)	e-111	Q4TTN2_CAERE	14-3-3 (Fragment)	5.00E-93	14332_CAEEL	14-3-3-like protein 2	4.00E-92	Q610V0_CAEBR	Hypothetical protein CBG17289	5.00E-92	Q6JKL1_MELIC	14-3-3b protein	5.00E-92		catalytic activity GO:0003824,binding GO:0005488
CD088122	Q2XXZ6_DROME	CG10719 (Fragment)	3.00E-18	Q2XXZ5_DROSI	CG10719 (Fragment)	3.00E-18	Q2XXZ4_DROSI	CG10719 (Fragment)	3.00E-18	Q2XXZ2_DROYA	CG10719 (Fragment)	3.00E-18	Q2XXZ1_DROER	CG10719 (Fragment)	3.00E-18	cell GO:0005623	catalytic activity GO:0003824,binding GO:0005488
CONTIG3885	Q5RDM4_PONPY	Hypothetical protein DKFZp459F0933	3.00E-33	Q59GF8_HUMAN	Heat shock 70kDa protein 4 isoform a variant (Fragment)	3.00E-33	HSP74_HUMAN	Heat shock 70 kDa protein 4 (Heat shock 70-related protein APG-2) (HSP70RY)	1.00E-32	Q7ZU46_BRARE	Heat shock protein 4, like	3.00E-32	Q5NCS5_MOUSE	Heat shock protein 4 (NOD-derived CD11c +ve dendritic cells cDNA, RIKEN full-le	3.00E-32		catalytic activity GO:0003824,binding GO:0005488
CD089827	Q4YWP1_PLABE	Hypothetical protein (Fragment)	0.24	O97277_PLAF7	Kinesin, putative	0.41	Q4YMX5_PLABE	Hypothetical protein (Fragment)	0.69	Q7RRH9_PLAYO	Hypothetical protein	0.69	PACC_CRYNE	pH-response transcription factor pacC/RIM101	0.69
CONTIG6789	Q9V7X3_DROME	CG9635-PD, isoform D (Cg9635-pf, isoform f)	3.1	Q8T9E3_DROME	SD04476p	3.1	O44381_DROME	Shar pei/DRhoGEF2	3.1	O44113_DROME	Putative guanine nucleotide exchange factor RhoGEF2	3.1	KIN2_YEAST	Serine/threonine-protein kinase KIN2 (EC 2.7.1.37)	5.2
CD092156	Q51ED7_ENTHI	Hypothetical protein	8.00E-05	Q3XCC6_METFL	Response regulator receiver:GAF:ATP-binding region, ATPase-like:Histidine kinase	0.003	Q6CWH2_KLULA	Similar to sp|P47166 Saccharomyces cerevisiae YJR134c SGM1	0.003	Q25561_NAEFO	Myosin II heavy chain (Fragment)	0.007	Q63731_RAT	Neuronal myosin heavy chain	0.013
CD090759
CD141470	Q25123_HELRO	Cyclin A (Fragment)	1.00E-32	O77212_DREPO	Cyclin A	2.00E-32	Q6GME9_XENLA	LOC397885 protein	7.00E-32	CCNA1_XENLA	Cyclin-A1	7.00E-32	CCNA_PATVU	G2/mitotic-specific cyclin-A	1.00E-31			physiological process GO:0007582, cellular process GO:0009987, regulation of biological process GO:0050789
SMLC25F12	Q5DBD4_SCHJA	SJCHGC06871 protein	4.00E-32	Q5C172_SCHJA	SJCHGC06460 protein (Fragment)	6.00E-30	Q5C3E9_SCHJA	SJCHGC05504 protein (Fragment)	2.00E-29	Q5DFR2_SCHJA	SJCHGC06760 protein	2.00E-04	Q7RY63_NEUCR	Predicted protein	0.42		catalytic activity GO:0003824, binding GO:0005488
CD144211	Q8RE58_FUSNN	Hypothetical protein FN1267	3.4	O48991_ORYSA	NBS-LRR type resistance protein (Fragment)	7.6	Q9MBX1_9CAUD	Gp71	9.9	Q77PU0_9CAUD	Gp71	9.9
CONTIG4097	Q7RS47_PLAYO	Hypothetical protein	2
CD089197	Q4W596_HUMAN	Hypothetical protein FRAS1 (Fragment)	0.013	FRAS1_HUMAN	Extracellular matrix protein FRAS1 precursor	0.013	SAS_DROME	Putative epidermal cell surface receptor precursor (Stranded at second protein)	1.2	Q9IBG7_XENLA	Kielin	3.4	Q80T03_MOUSE	MUC6	7.6
CD092758
CD140628	Q7QAK6_ANOGA	ENSANGP00000011823	2.00E-20	Q9VHF4_DROME	CG33936-PA, isoform A (Cg33936-pb, isoform b) (RE70963p)	2.00E-20	Q8WQ62_DROME	Hypothetical protein	2.00E-20	Q8INP3_DROME	CG33936-PD, isoform D	5.00E-20	Q4AB40_DROME	CG33936-PC, isoform C	5.00E-20		catalytic activity GO:0003824, binding GO:0005488
CD136148	Q6E0R2_9METZ	Elongation factor-1 alpha (Fragment)	3.00E-33	Q6PTS5_9ECHI	Elongation factor 1 alpha (Fragment)	9.00E-33	Q3YBJ5_9HEMI	Elongation factor 1-alpha (Fragment)	2.00E-32	Q3YBJ4_9HEMI	Elongation factor 1-alpha (Fragment)	2.00E-32	Q3YBF0_9HEMI	Elongation factor 1-alpha (Fragment)	2.00E-32		catalytic activity GO:0003824, binding GO:0005488	physiological process GO:0007582, cellular process GO:0009987
CD131053	Q3U2U8_MOUSE	NOD-derived CD11c +ve dendritic cells cDNA, RIKEN full-length enriched library,	1.00E-18	Q3ZAU4_RAT	Kazal-type serine protease inhibitor domain 1	1.00E-18	KAZD1_MOUSE	Kazal-type serine protease inhibitor domain 1 precursor (IGFBP-related protein 1	1.00E-18	Q3I347_ONCMY	Insulin-like growth factor binding protein 7	3.00E-18	Q6GQ38_XENLA	MGC80370 protein	6.00E-18	extracellular region GO:0005576	catalytic activity GO:0003824, binding GO:0005488	physiological process GO:0007582, cellular process GO:0009987, growth GO:0040007, regulation of biological process GO:0050789
CD142285	Q9W080_DROME	CG12023-PA, isoform A	1.5
CD142591
CD092713	Q3TKF2_MOUSE	Blastocyst blastocyst cDNA, RIKEN full-length enriched library, clone:I1C0027N18	0.31	Q3TI26_MOUSE	CDNA, RIKEN full-length enriched library, clone:I730048G20 product:5'-3' exoribo	0.31	XRN2_MOUSE	5'-3' exoribonuclease 2 (EC 3.1.11.-) (Protein Dhm1)	0.31	Q5R4L5_PONPY	Hypothetical protein DKFZp459J063	0.69	Q3L8N4_HUMAN	5'-3' exoribonuclease 2 isoform 3	0.69
CONTIG3497
CD091998	Q54YD2_DICDI	Hypothetical protein	3.00E-05	Q54SW2_DICDI	Hypothetical protein	0.021	Q54SW1_DICDI	Hypothetical protein	0.021	Q9FG22_ARATH	Similarity to unknown protein	0.046	Q8L9R3_ARATH	Hypothetical protein	0.06		catalytic activity GO:0003824, binding GO:0005488
CD142493	Q9NL13_BRABE	AmPTPR4c protein (Fragment)	5.7	Q9NL14_BRABE	AmPTPR4b protein (Fragment)	7.5	Q4A9K4_MYCHJ	Hypothetical protein	9.8
CD131827	Q4SXQ3_TETNG	Chromosome undetermined SCAF12354, whole genome shotgun sequence. (Fragment)	8.00E-15	Q6IQA7_BRARE	Hm13 protein (Signal peptide peptidase)	1.00E-14	Q7T0W7_XENLA	H13-prov protein	1.00E-13	Q68A31_CIOIN	Presenilin-like protein 3	3.00E-13	Q9VPQ7_DROME	CG11840-PA (SD07518p)	6.00E-13	cell GO:0005623	catalytic activity GO:0003824
CD091742	Q4S9N0_TETNG	Chromosome undetermined SCAF14696, whole genome shotgun sequence. (Fragment)	2.00E-11	Q4S4U6_TETNG	Chromosome 2 SCAF14738, whole genome shotgun sequence	2.00E-11	Q7ZYF8_XENLA	MGC64475 protein (Fragment)	2.00E-11	Q6PBE9_XENTR	ATPase, H+ transporting, V0 subunit C	2.00E-11	Q8JGS3_BRARE	Vacuolar ATP synthase 16 kDa proteolipid subunit	2.00E-11	cell GO:0005623		physiological process GO:0007582, cellular process GO:0009987
CD141605	Q8AVH4_XENLA	MGC53417 protein (NOB1 protein)	1.00E-25	Q6DDB9_XENTR	MGC89796 protein	2.00E-25	Q7YRC8_MACMU	Putative 28 kDa protein (Fragment)	4.00E-25	Q53G13_HUMAN	Putatative 28 kDa protein variant (Fragment)	4.00E-25	Q9NRX1_HUMAN	Putatative 28 kDa protein (RNA-binding protein LOC56902) (Hypothetical protein L	4.00E-25		catalytic activity GO:0003824, binding GO:0005488
CD142757	Q876J8_SACBA	CLA4 (Fragment)	0.18	Q8C788_MOUSE	13 days embryo heart cDNA, RIKEN full-length enriched library, clone:D330033C12	0.52	Q3UPB9_MOUSE	6 days neonate spleen cDNA, RIKEN full-length enriched library, clone:F430005J02	0.52	Q3U1H7_MOUSE	Activated spleen cDNA, RIKEN full-length enriched library, clone:F830002A20 prod	0.52	Q9U715_CHAVR	Homeoprotein CH-Hox5 (Fragment)	0.52
CD130680	Q5BYM9_SCHJA	SJCHGC09192 protein (Fragment)	8.00E-05	Q6DEC8_XENLA	MGC78939 protein	4.00E-04	O45786_CAEEL	Hypothetical protein	4.00E-04	Q4T151_TETNG	Chromosome undetermined SCAF10716, whole genome shotgun sequence. (Fragment)	5.00E-04	Q60YG4_CAEBR	Hypothetical protein CBG18253	7.00E-04
CD136154	Q55G46_DICDI	Hypothetical protein	0.1	Q29071_PIG	Gastric mucin (Fragment)	0.14	Q517V8_ENTHI	Hypothetical protein	0.14	Q98RN1_GUITH	RNA polymerase III largest subunit	0.18	Q71DF4_DROYA	CG4363 (Fragment)	0.18
CD139642	EF1B_ARTSA	Elongation factor 1-beta (EF-1-beta)	7.00E-19	Q6IQE2_BRARE	Eef1b2 protein	1.00E-18	Q7ZV16_BRARE	Eukaryotic translation elongation factor 1 beta 2	1.00E-18	Q5ZHY1_CHICK	Hypothetical protein	1.00E-18	Q4SDF8_TETNG	Chromosome 3 SCAF14639, whole genome shotgun sequence. (Fragment)	2.00E-18	cell GO:0005623, protein complex GO:0043234	catalytic activity GO:0003824,binding GO:0005488	physiological process GO:0007582, cellular process GO:0009987
CD131520	Q86EU7_SCHJA	Clone ZZD1408 mRNA sequence	2.00E-36	Q6B8B7_9ACAR	Ribosomal protein L44	4.00E-36	Q4PM81_IXOSC	Ribosomal protein L44	4.00E-36	RL44_COPCI	60S ribosomal protein L44 (60S ribosomal protein L41)	1.00E-34	Q8MUE4_9BIVA	Ribosomal protein L44	3.00E-34	cell GO:0005623, organelle GO:0043226, protein complex GO:0043234	catalytic activity GO:0003824,structural molecule activity GO:0005198	physiological process GO:0007582, cellular process GO:0009987
CD091706	Q805B1_CHICK	Tumor necrosis factor receptor associated factor-5 (Hypothetical protein)	4.00E-06	Q8CE28_MOUSE	10 days neonate skin cDNA, RIKEN full-length enriched library, clone:4732496E14	9.00E-06	Q3UM74_MOUSE	Mammary gland RCB-0526 Jyg-MC(A) cDNA, RIKEN full-length enriched library, clone	9.00E-06	TRAF1_MOUSE	TNF receptor-associated factor 1	9.00E-06	Q5RAE4_PONPY	Hypothetical protein DKFZp469G032	3.00E-05
CONTIG3895	Q9N302_CAEEL	Hypothetical protein	2.00E-29	Q61UX4_CAEBR	Hypothetical protein CBG05109	2.00E-29	Q6IN15_RAT	Acyl-CoA synthetase long-chain family member 5	2.00E-28	ACSL5_RAT	Long-chain-fatty-acid--CoA ligase 5 (EC 6.2.1.3) (Long-chain acyl-CoA synthetase	2.00E-28	Q3UKS0_MOUSE	15 days pregnant adult female placenta cDNA, RIKEN full-length enriched library,	2.00E-28		catalytic activity GO:0003824,transporter activity GO:0005215	physiological process GO:0007582
CD131278	Q7PRP4_ANOGA	ENSANGP00000017613	8.00E-18	Q86DV9_SCHJA	Clone ZZZ59 mRNA sequence	4.00E-16	Q6IV29_ECHGR	Myophilin-like protein	4.00E-16	Q9I7J0_DROME	CG5023-PA (GH21596p) (RE39031p)	2.00E-14	Q4PLJ5_9CUCU	Muscle protein 20-like protein	5.00E-14		catalytic activity GO:0003824, binding GO:0005488	physiological process GO:0007582, cellular process GO:0009987
CONTIG3880
CD091817	Q5QGS4_MOUSE	Cadherin 23 isoform B1	0.76	Q5QGS3_MOUSE	Cadherin 23 isoform B2	0.76	Q5DUA5_MOUSE	Cadherin 23	0.76	Q5DUA4_MOUSE	Cadherin 23	0.76	Q5DUA3_MOUSE	Cadherin 23	0.76
CD092775
CD136076	RT15_DROME	28S ribosomal protein S15, mitochondrial precursor (MRS-S15) (Bonsai protein) (D	7.00E-04	Q4UGY6_THEAN	Ribosomal protein s15, mitochondrial, putative	0.11	Q7Q6X7_ANOGA	ENSANGP00000017652 (Fragment)	0.18	Q4N8Q0_THEPA	40S ribosomal protein S15, putative	0.18	Q4S788_TETNG	Chromosome undetermined SCAF14718, whole genome shotgun sequence	0.24
CD138308	Q56FH5_9HYME	Ribosomal protein L8	2.00E-59	Q4GXL3_9DYTI	Ribosomal protein L8e (Fragment)	3.00E-59	Q5D0C0_XENLA	Rpl8-prov protein	3.00E-58	Q6ED36_RANCA	Ribosomal protein L8 (Fragment)	3.00E-58	RL8_XENTR	60S ribosomal protein L8	3.00E-58	cell GO:0005623, organelle GO:0043226, protein complex GO:0043234	catalytic activity GO:0003824,structural molecule activity GO:0005198, binding GO:0005488	physiological process GO:0007582, cellular process GO:0009987
CONTIG6517	Q59FA0_HUMAN	Polymerase (DNA directed), delta 1, catalytic subunit 125kDa variant (Fragment)	3.4	Q6NWE4_BRARE	Sequestosome 1	7.6	Q6GZT3_FRG3V	Hypothetical protein	9.9	Q8FDG2_ECOL6	Hypothetical protein c3820	9.9
CD092437	Q5R418_PONPY	Hypothetical protein DKFZp459F162	0.4	Q5TH09_HUMAN	Protein kinase C binding protein 1	0.4	Q4JJ95_HUMAN	Transcriptional repressor BSR/RACK7/PRKCBP1 isoform m	0.4	PKCB1_HUMAN	Protein kinase C binding protein 1 (Rack7) (Cutaneous T-cell lymphoma associate	0.4	Q55F68_DICDI	Adenylyl cyclase	0.68
CD136070	Q4RVY5_TETNG	Chromosome 9 SCAF14991, whole genome shotgun sequence. (Fragment)	2.00E-07	Q6IQ57_BRARE	Signal sequence receptor, delta	2.00E-07	Q4PLZ1_IXOSC	Signal sequence receptor delta	1.00E-06	Q6KFY1_MONDO	Signal sequence receptor delta (Fragment)	2.00E-06	Q7SZ89_XENLA	LOC398633 protein (Fragment)	3.00E-05
CD136138	Q5U3Q0_BRARE	Zgc:101797	8.00E-10	Q9DAH3_MOUSE	Adult male testis cDNA, RIKEN full-length enriched library, clone:1700010L19 pro	2.00E-09	Q3ZTL6_MOUSE	Testicular microtubules-related protein 4	2.00E-09	Q6IP53_XENLA	MGC78949 protein	9.00E-09	Q9U0E3_STRPU	Tektin A1	2.00E-08
CD134580	Q8AVH9_XENLA	Ppp2ca-prov protein (Phosphoprotein phosphatase 2A-alpha catalytic chain) (EC 3.	6.00E-96	Q6P365_XENTR	Protein phosphatase 2A, catalytic subunit, beta isoform	6.00E-96	Q5ZM47_CHICK	Hypothetical protein	6.00E-96	Q5SNY5_MOUSE	Protein phosphatase 2a, catalytic subunit, alpha isoform (Activated spleen cDNA,	6.00E-96	Q4R5N5_MACFA	Brain cDNA, clone: QccE-12264, similar to human protein phosphatase 2 (formerly	6.00E-96		catalytic activity GO:0003824, binding GO:0005488
CD136149	Q8T8T9_DROME	AT30094p (CG31717-PA)	2.00E-11	Q7PNM7_ANOGA	ENSANGP00000017459 (Fragment)	8.00E-10	Q9AXP8_IPONI	PnFL-1	3.00E-08	Q4SXJ8_TETNG	Chromosome 1 SCAF12382, whole genome shotgun sequence. (Fragment)	1.00E-06	Q6H6M1_ORYSA	Putative PnFL-1	1.00E-06
CD139008	Q544P6_MOUSE	16 days embryo lung cDNA, RIKEN full-length enriched library, clone:8430427E20 p	0.24	DHH_MOUSE	Desert hedgehog protein precursor (DHH) (HHG-3) [Contains: Desert hedgehog prote	0.24	Q4I0N1_GIBZE	Hypothetical protein	0.53	Q7PXI1_ANOGA	ENSANGP00000015828 (Fragment)	0.9	O17499_BRAFL	AmphiHh protein	2
CD086021	Q6QC96_ELAOL	T2 family ribonuclease (Fragment)	1.3	Q3EIT5_ACTSC	ABC-type Fe3+-siderophores transport systems, periplasmic components precursor	6.2	Q9VRW7_DROME	CG13300-PA	6.2
CD090999
CD093577	Q54NE5_DICDI	Hypothetical protein	1.2	Q3EH97_ACTSC	GTPases	3.4	Q5MZN9_SYNP6	Hypothetical protein	7.7	Q31M87_SYNP7	Response regulator receiver domain protein (CheY-like)	7.7	Q416J8_KINRA	Hypothetical protein	7.7
CD138357	Q4SQG3_TETNG	Chromosome 4 SCAF14533, whole genome shotgun sequence. (Fragment)	5.00E-52	Q6DFP1_XENTR	LOC447981 protein (Fragment)	9.00E-52	Q56FL4_9HYME	Ribosomal protein L7a	1.00E-51	Q801I1_PETMA	Ribosomal protein L7A (Fragment)	2.00E-51	RL7A_FUGRU	60S ribosomal protein L7a (Surfeit locus protein 3)	2.00E-51	cell GO:0005623, organelle GO:0043226, protein complex GO:0043234	catalytic activity GO:0003824,structural molecule activity GO:0005198	physiological process GO:0007582, cellular process GO:0009987
CD134576	Q70MP2_CRAGI	Ribosomal protein S3a (Fragment)	1.00E-29	RS3A_APLCA	40S ribosomal protein S3a (Lysine-rich protein KRP-A)	3.00E-29	Q4R4Z6_MACFA	Brain cDNA, clone: QnpA-15704, similar to human ribosomal protein S3A (RPS3A),	5.00E-29	Q56JV9_BOVIN	Ribosomal protein S3a	5.00E-29	Q6BDL8_FELCA	Ribosomal protein S3a (Fragment)	5.00E-29	cell GO:0005623, organelle GO:0043226, protein complex GO:0043234	catalytic activity GO:0003824,structural molecule activity GO:0005198	physiological process GO:0007582, cellular process GO:0009987
CD139368	Q2YDQ3_BRARE	Hypothetical protein	3.00E-37	Q4RQS2_TETNG	Chromosome 2 SCAF15004, whole genome shotgun sequence	3.00E-37	Q6TNP9_BRARE	Tubulin, alpha 2	3.00E-37	Q9D9Y2_MOUSE	Adult male testis cDNA, RIKEN full-length enriched library, clone:1700025I19 pro	3.00E-37	Q5FW91_MOUSE	Tubulin, alpha 3 (Adult male testis cDNA, RIKEN full-length enriched library, cl	3.00E-37	cell GO:0005623, organelle GO:0043226, protein complex GO:0043234	catalytic activity GO:0003824,structural molecule activity GO:0005198, binding GO:0005488	cellular process GO:0009987
CD088689
CD200490
>CL590	Q75WG2_PENJP	Thrombospondin	4.00E-39	Q75WG1_PENJP	Thrombospondin	5.00E-31	Q9BLJ1_CIOIN	Ci-META1	3.00E-21	Q75WG0_PENJP	Thrombospondin	4.00E-21	STAB2_HUMAN	Stabilin-2 precursor (FEEL-2 protein) (Fasciclin EGF-like laminin-type EGF-like	6.00E-20	extracellular region GO:0005576, extracellular matrix GO:0031012	catalytic activity GO:0003824,signal transducer activity GO:0004871,structural molecule activity GO:0005198,binding GO:0005488	physiological process GO:0007582, cellular process GO:0009987
CD092357	Q617A0_CAEBR	Hypothetical protein CBG15066	2	Q9XWR3_CAEEL	Hypothetical protein	2	RCR2_YEAST	Protein RCR2 (Protein SSH5)	7.6	Q4XWM5_PLACH	Hypothetical protein (Fragment)	9.9	Q618W5_CAEBR	Hypothetical protein CBG14460	9.9
CD090755	Q7PV66_ANOGA	ENSANGP00000011153 (Fragment)	1.2	Q4T4X0_TETNG	Chromosome undetermined SCAF9517, whole genome shotgun sequence. (Fragment)	3.5	Q9JLP3_MOUSE	Putative extracellular matrix protein MUSH2A	7.7
CONTIG4145	Q7SA16_NEUCR	Hypothetical protein	9.4
CD094083	Q9GPH2_BOMMO	Protein disulfide isomerase	2.00E-25	Q7Q0E3_ANOGA	ENSANGP00000011666 (Fragment)	5.00E-23	Q5TMX9_ANOGA	ENSANGP00000026077 (Fragment)	5.00E-23	Q53YH5_DROME	RE10429p	2.00E-22	Q86PE2_DROME	RH09122p	2.00E-22	cell GO:0005623, organelle GO:0043226	catalytic activity GO:0003824, transporter activity GO:0005215
CONTIG8203	Q4K8H2_PSEF5	Ureidoglycolate hydrolase (EC 3.5.3.19)	5.00E-84	Q3KFL0_PSEFL	Ureidoglycolate hydrolase (EC 3.5.3.19)	6.00E-81	ALLA_PSEPK	Ureidoglycolate hydrolase (EC 3.5.3.19)	1.00E-78	Q48KS5_PSE14	Ureidoglycolate hydrolase (EC 3.5.3.19)	3.00E-74	Q4ZVG9_PSEU2	Ureidoglycolate hydrolase (EC 3.5.3.19)	3.00E-74
CD091677	Q6NXB8_BRARE	Atp6v0c protein	2.00E-23	Q8C1D9_MOUSE	Adult male hippocampus cDNA, RIKEN full-length enriched library, clone:2900002E1	4.00E-23	Q3UK60_MOUSE	TIB-55 BB88 cDNA, RIKEN full-length enriched library, clone:I730024L21 product:A	4.00E-23	Q3TD69_MOUSE	NOD-derived CD11c +ve dendritic cells cDNA, RIKEN full-length enriched library,	4.00E-23	Q80YP7_MOUSE	ATPase, H+ transporting, V0 subunit C (Fragment)	4.00E-23	cell GO:0005623,protein complex GO:0043234	catalytic activity GO:0003824,transporter activity GO:0005215	physiological process GO:0007582, cellular process GO:0009987
CD084712	Q4T281_TETNG	Chromosome undetermined SCAF10316, whole genome shotgun sequence. (Fragment)	5.00E-09	RBM4_BRARE	RNA-binding protein 4 (RNA-binding motif protein 4)	5.00E-09	Q6P4L3_XENTR	RNA binding motif protein 4	7.00E-09	Q6GPD7_XENLA	MGC80472 protein	7.00E-09	Q803F7_BRARE	RNA binding motif protein 4	9.00E-09
CONTIG3520	DLG1_DROME	Discs large-1 tumor suppressor protein	1.00E-36	Q3UP61_MOUSE	6 days neonate spleen cDNA, RIKEN full-length enriched library, clone:F430107E0	2.00E-36	DLG1_MOUSE	Presynaptic protein SAP97 (Synapse-associated protein 97) (SAP-97) (Disks large	2.00E-36	DLG1_HUMAN	Presynaptic protein SAP97 (Synapse-associated protein 97) (SAP-97) (Disks large	3.00E-36	DLG1L_BRARE	Synapse-associated protein 97B (SAP-97B) (Presynaptic protein SAP97B) (Discs lar	3.00E-36		catalytic activity GO:0003824,binding GO:0005488
CD131630	RS19_MYXGL	40S ribosomal protein S19	1.00E-10	Q6PHL6_XENLA	Rps19-prov protein	4.00E-10	Q5MIR7_AEDAL	Ribosomal protein S19	6.00E-10	Q4GXP8_9COLE	Ribosomal protein S19e	8.00E-10	Q5M9P3_MOUSE	Rps19 protein (Fragment)	4.00E-09	cell GO:0005623, organelle GO:0043226, protein complex GO:0043234	catalytic activity GO:0003824,structural molecule activity GO:0005198	physiological process GO:0007582, cellular process GO:0009987
CD136047	Q9VWE4_DROME	CG14216-PA (LD40846p)	1.5	O97298_PLAF7	Hypothetical protein MAL3P7.34	2.6	Q719F5_9MAGN	Maturase K (Fragment)	5.7	Q7RLU8_PLAYO	KED	5.7	Q50TJ7_ENTHI	Hypothetical protein	7.5
CONTIG6912	Q6BVT3_DEBHA	Similar to CAGL-IPF11744 Candida glabrata IPF 11744.1 (Fragment)	0.015	Q7PMD5_ANOGA	ENSANGP00000004655 (Fragment)	0.17	Q9BMP3_MONBE	DNA-dependent RNA polymerase II largest subunit RPB1 (Fragment)	0.17	Q66KF1_XENLA	MGC86475 protein	0.22	Q5F298_MOUSE	Polymerase (RNA) II (DNA directed) polypeptide A	0.22
CD138913	Q58DW3_BOVIN	Ribosomal protein L29 (Ribosomal protein L29/cell surface heparin binding protei	2.00E-11	RL29_PIG	60S ribosomal protein L29	7.00E-11	Q6IPY3_HUMAN	Ribosomal protein L29	1.00E-10	Q6IPI1_HUMAN	Ribosomal protein L29	1.00E-10	RL29_HUMAN	60S ribosomal protein L29 (Cell surface heparin binding protein HIP)	1.00E-10	cell GO:0005623, organelle GO:0043226, protein complex GO:0043234	catalytic activity GO:0003824,structural molecule activity GO:0005198	physiological process GO:0007582, cellular process GO:0009987
CD086210	Q3W418_9ACTO	Response regulator receiver	9.9
CD087400	Q607P3_METCA	Ribose-phosphate pyrophosphokinase family protein	2
CD140298	Q8NQT2_CORGL	Hypothetical protein Cgl1342	6.00E-19	Q6M5L6_CORGL	Secreted protein	6.00E-19	Q83I09_TROW8	Hypothetical protein	8.00E-16	Q83G60_TROWT	Hypothetical protein	8.00E-16	Q8NPU2_CORGL	Hypothetical protein Cgl1719	1.00E-13
CD090643
CONTIG6858	Q4GXT6_9COLE	Ribosomal protein S8e	3.00E-84	Q4GXT8_AGRLI	Ribosomal protein S8e	3.00E-83	Q5UAN6_BOMMO	Ribosomal protein S8	1.00E-82	Q497E9_MOUSE	Ribosomal protein S8 (17 days embryo kidney cDNA, RIKEN full-length enriched lib	3.00E-82	Q4R6P8_MACFA	Testis cDNA, clone: QtsA-17450, similar to human ribosomal protein S8 (RPS8),	3.00E-82	cell GO:0005623
CONTIG6520	Q9GPA9_CHEDE	Ribosomal protein S18 (Fragment)	5.00E-30	Q4TAG6_TETNG	Chromosome undetermined SCAF7348, whole genome shotgun sequence. (Fragment)	1.00E-28	Q6Y200_PAGMA	40S ribosomal protein S18 (Fragment)	1.00E-28	Q5DVH4_PLAFE	40S ribosomal protein S18	1.00E-28	RS18_BRARE	40S ribosomal protein S18	2.00E-28	cell GO:0005623, organelle GO:0043226, protein complex GO:0043234	catalytic activity GO:0003824, structural molecule activity GO:0005198, binding GO:0005488	physiological process GO:0007582, cellular process GO:0009987
CD136302	Q5F3R9_CHICK	Hypothetical protein	3.00E-06	Q3T9S3_MOUSE	Activated spleen cDNA, RIKEN full-length enriched library, clone:F830201H10 prod	3.00E-06	Q5VXV1_HUMAN	SET translocation (Myeloid leukemia-associated) variant (Myeloid leukemia-associ	3.00E-06	Q5VXV3_HUMAN	SET translocation (Myeloid leukemia-associated)	3.00E-06	Q5VXV2_HUMAN	SET translocation (Myeloid leukemia-associated)	3.00E-06
CD092905	Q5NXH3_AZOSE	Putative lysozyme	5.00E-17	Q82VB8_NITEU	Putative peptidoglycan binding domain 1	9.00E-17	Q48J35_PSE14	Prophage PSPPH04, putative lysozyme	2.00E-16	Q856Y8_9CAUD	Gp46	2.00E-16	Q4ZSR6_PSEU2	Glycoside hydrolase, family 19 precursor	2.00E-16
CONTIG6665
SCM14332R		SCHISTOSOMA MANSONI 14-3-3-2 MRNA, 3' END OF CDS	OM0023376-AOP														catalytic activity GO:0003824,binding GO:0005488
CD090828
CD088762	Q5JA55_9LABR	Recombination-activating protein 2 (Fragment)	0.69	Q8CD87_MOUSE	Adult male thymus cDNA, RIKEN full-length enriched library, clone:5830490O08 pro	0.69	Q5JA42_9LABR	Recombination-activating protein 2 (Fragment)	1.5	Q3L0Q3_CYPCA	Recombination-activating protein 2	2.6	Q5JA72_9LABR	Recombination-activating protein 2 (Fragment)	2.6
CD140409	Q9Y011_PLAF7	Hypothetical protein MAL3P5.7	5.9	RLX1_SALTY	43 kDa relaxation protein	5.9
CONTIG3863	Q70SY1_HUMAN	Basic transcription factor 2 homologue	1.00E-22	Q6ZMR6_HUMAN	Hypothetical protein FLJ16743	1.00E-22	Q5RCM9_PONPY	Hypothetical protein DKFZp469F144	1.00E-22	Q70T21_HUMAN	FUS/BBF2H7 protein (Fragment)	2.00E-22	Q70T20_HUMAN	FUS/BBF2H7 protein (Fragment)	2.00E-22	cell GO:0005623, organelle GO:0043226	binding GO:0005488, transcription regulator activity GO:0030528	physiological process GO:0007582,cellular process GO:0009987, regulation of biological process GO:0050789
CD088818	Q6BJ00_DEBHA	Debaryomyces hansenii chromosome G of strain CBS767 of Debaryomyces hansenii	3.7	Q4YW60_PLABE	Hypothetical protein	8.2	Q4XS37_PLACH	Hypothetical protein	8.2	Q7RJ37_PLAYO	Hypothetical protein	8.2
CONTIG4181	Q5EIG9_9HOMO	Translation elongation factor 1-alpha (Fragment)	9.00E-54	Q9HG68_9ZYGO	Translation elongation factor 1-alpha (Fragment)	1.00E-53	Q4PS67_9AGAR	Translation elongation factor 1-alpha (Fragment)	1.00E-53	EF1A_PIRIN	Elongation factor 1-alpha (EF-1-alpha)	1.00E-53	Q9HGB8_9ZYGO	Translation elongation factor 1-alpha (Fragment)	2.00E-53	cell GO:0005623	binding GO:0005488, translation regulator activity GO:0045182	physiological process GO:0007582,cellular process GO:0009987
CD088447	Q9VXH3_DROME	CG4200-PA (RE62235p)	1.2	Q86RA5_DROPS	Phospholipase C gamma	3.4	Q86RA6_DROVI	Phospholipase C gamma	4.5
CONTIG6778	Q56J82_9BILA	S14e ribosomal protein-like protein	5.00E-65	Q9XYQ4_STOCA	Ribosomal protein S14	4.00E-56	Q6XI08_DROYA	Similar to Drosophila melanogaster RpS14a (Fragment)	6.00E-56	Q6EUY9_9COLE	S14e ribosomal protein	6.00E-56	RS14_DROME	40S ribosomal protein S14	6.00E-56	cell GO:0005623, organelle GO:0043226, protein complex GO:0043234	structural molecule activity GO:0005198	physiological process GO:0007582,cellular process GO:0009987
CONTIG3790	FBXW7_DROME	F-box/WD-repeat protein 7 (F-box and WD-40 domain protein 7) (Archipelago prote	3.00E-28	Q5R627_PONPY	Hypothetical protein DKFZp459M2115	1.00E-27	Q5R8U9_PONPY	Hypothetical protein DKFZp459C1034 (Fragment)	1.00E-27	Q68DR0_HUMAN	Hypothetical protein DKFZp686F23254	1.00E-27	Q53F40_HUMAN	F-box protein FBW7 isoform 2 variant (Fragment)	1.00E-27			physiological process GO:0007582,cellular process GO:0009987
>CL1332	Q8C2C7_MOUSE	2 days neonate thymus thymic cells cDNA, RIKEN full-length enriched library, clo	e-130	Q3UIP0_MOUSE	17 days embryo heart cDNA, RIKEN full-length enriched library, clone:I920062F22	e-130	Q3KQP2_MOUSE	Hspd1 protein (Fragment)	e-130	Q3T179_BOVIN	LOC511913 protein (Fragment)	e-130	CH60_RAT	60 kDa heat shock protein, mitochondrial precursor (Hsp60) (60 kDa chaperonin) (	e-130		binding GO:0005488	physiological process GO:0007582,cellular process GO:0009987
CONTIG9424	Q4PHY2_USTMA	Hypothetical protein	7.7
CD094341	Q6L6T3_ANTYA	Heat shock protein Hsp70	3.00E-45	Q6SYX2_DROVI	Heat shock protein Hsp70g	6.00E-45	Q6SYX0_DROVI	Heat shock protein Hsp70b (Heat shock protein Hsp70e) (Heat shock protein Hsp70f	6.00E-45	Q6SYW9_DROVI	Heat shock protein Hsp70c	6.00E-45	Q6SYX3_DROVI	Heat shock protein Hsp70d (Fragment)	8.00E-45		binding GO:0005488
CONTIG6518	Q5D080_XENLA	Betatub56d-prov protein	8.00E-74	Q86D82_APLCA	Beta tubulin	8.00E-74	TBB_STRPU	Tubulin beta chain (Beta tubulin) (Fragment)	8.00E-74	TBB_PARLI	Tubulin beta chain (Beta tubulin)	8.00E-74	TBB_LYTPI	Tubulin beta chain (Beta tubulin) (Fragment)	8.00E-74	cell GO:0005623,organelle GO:0043226, protein complex GO:0043234	catalytic activity GO:0003824, structural molecule activity GO:0005198, binding GO:0005488	physiological process GO:0007582,cellular process GO:0009987
>CL1386	HSP90_BRUPA	Heat shock protein 90	e-122	Q8I9S5_HETGL	Hsp90	e-120	Q45XA2_BEMTA	90 kDa heat shock protein	e-120	Q18688_CAEEL	Hypothetical protein daf-21	e-119	HS90B_RAT	Heat shock protein HSP 90-beta (HSP 84)	e-119		binding GO:0005488	physiological process GO:0007582,cellular process GO:0009987, response to stimulus GO:0050896
CD142677	Q8HEI3_9ACAR	Cytochrome oxidase subunit III	4.00E-19	Q8HCK8_9ACAR	Cytochrome oxidase III	4.00E-19	Q6GYA2_9NEOP	Cytochrome oxidase subunit 3 (Fragment)	4.00E-19	Q94XD7_9NEOP	Cytochrome oxidase subunit III	1.00E-18	Q6GYA3_9NEOP	Cytochrome oxidase subunit 3 (Fragment)	1.00E-18	cell GO:0005623, envelope GO:0031967, organelle GO:0043226	catalytic activity GO:0003824, transporter activity GO:0005215	physiological process GO:0007582,cellular process GO:0009987
CD091481	TPIS_SCHMA	Triosephosphate isomerase (EC 5.3.1.1) (TIM) (Triose-phosphate isomerase)	1.00E-09	Q86ER7_SCHJA	Clone ZZD1500 mRNA sequence	3.00E-09	TPIS_SCHJA	Triosephosphate isomerase (EC 5.3.1.1) (TIM) (Triose-phosphate isomerase)	3.00E-09	Q45XG1_9TREM	Triose-phosphate isomerase	6.00E-08	Q76BH6_PROAN	Triose phosphate isomerase (Fragment)	6.00E-07		catalytic activity GO:0003824	physiological process GO:0007582
CONTIG4078	Q6BG19_PARTE	Hypothetical protein	0.002	VE22_LAMBD	EA22 gene protein	0.014	Q6C7G4_YARLI	Similarities with sp|Q09174 Schizosaccharomyces pombe SPCC736.04C Alpha-1	0.019	Q9YVP8_MSEPV	ORF MSV194 ALI motif gene family protein	0.042	Q8IJJ9_PLAF7	Cytoplasmic dynein intermediate chain, putative	0.072
CD090346	Q6YZ49_ORYSA	Replication protein A 70kDa	1.00E-06	Q9AVL8_ORYSA	Replication protein A 70kDa	2.00E-06	Q59ES9_HUMAN	Replication protein A1, 70kDa variant (Fragment)	2.00E-06	RFA1_HUMAN	Replication protein A 70 kDa DNA-binding subunit (RP-A) (RF-A) (Replication fact	2.00E-06	Q7TP21_RAT	Cb1-727	2.00E-06
CD092312	Q5TCZ1_HUMAN	SH3 multiple domains 1	6.00E-18	O89032_MOUSE	Fish protein	2.00E-17	Q6DC19_BRARE	LOC553242 protein (Fragment)	9.00E-17	Q5HZR9_XENLA	LOC496321 protein (Fragment)	9.00E-17	Q5BLH9_BRARE	LOC553242 protein (Fragment)	9.00E-17		binding GO:0005488	cellular process GO:0009987
>CL1261	Q4YYB1_PLABE	Uroporphyrinogen decarboxylase, putative	4.4
>CL194	Q6E8G0_9HEMI	Cytochrome oxidase subunit I (Fragment)	3.00E-52	Q6E8G6_9HEMI	Cytochrome oxidase subunit I (Fragment)	2.00E-51	Q8M753_9CARA	Cytochrome oxidase I (Fragment)	2.00E-51	Q6E8G4_9HEMI	Cytochrome oxidase subunit I (Fragment)	3.00E-51	Q6E8L6_9HEMI	Cytochrome oxidase subunit I (Fragment)	4.00E-51	cell GO:0005623, envelope GO:0031967,organelle GO:0043226	catalytic activity GO:0003824,transporter activity GO:0005215, binding GO:0005488	physiological process GO:0007582,cellular process GO:0009987
CONTIG3766	Q86IV5_DICDI	Similar to Dictyostelium discoideum (Slime mold). Countin (Component of the coun	1.00E-20	Q9U7C4_DICDI	Countin	2.00E-19	Q8WSR7_DICDI	Countin2	2.00E-18	Q86HV8_DICDI	Similar to Dictyostelium discoideum (Slime mold). Countin (Countin3) (Hypothetic	4.00E-14	Q554K2_DICDI	Hypothetical protein	3.00E-09
CD092228	Q9NL08_EPTBU	HgPTPR2Aa protein (Fragment)	5.00E-42	Q9IBA2_9CHON	RyPTPR2Ab protein (Fragment)	8.00E-42	Q8VBV0_MOUSE	Protein tyrosine phosphatase, receptor type, delta A (Protein tyrosine phosphat	8.00E-42	Q8C922_MOUSE	7 days neonate cerebellum cDNA, RIKEN full-length enriched library, clone:A73006	8.00E-42	Q5SPJ6_MOUSE	Protein tyrosine phosphatase, receptor type, D	8.00E-42		catalytic activity GO:0003824	physiological process GO:0007582,cellular process GO:0009987
CD133774	O00790_PLAFA	Merozoite surface antigen 2	0.7	Q3UT08_MOUSE	2 cells egg cDNA, RIKEN full-length enriched library, clone:B020032E21 product:D	0.91	Q3UM00_MOUSE	Mammary gland RCB-0527 Jyg-MC(B) cDNA, RIKEN full-length enriched library, clone	0.91	Q99J37_MOUSE	DEP domain containing 6	0.91	Q570Y9_MOUSE	MKIAA4200 protein (Fragment)	0.91
CD092427
CD093524	MNN4_YEAST	Protein MNN4	0.01	Q611D2_CAEBR	Hypothetical protein CBG17156	0.021	Q8IL30_PLAF7	Hypothetical protein	0.028	Q5CQL9_CRYPV	Large low complexity coiled coil protien with large repeat region	0.028	Q8T5C7_PLAFA	Erythrocyte binding protein 1 (Chimeric erythrocyte-binding protein MAEBL)	0.037
CD086027	Q9T9H8_HALRO	NADH dehydrogenase subunit 4	5.00E-06	Q60H86_TODPA	NADH dehydrogenase subunit 4 (Fragment)	5.00E-05	O63595_9ECHI	NADH-ubiquinone oxidoreductase chain 4 (EC 1.6.5.3) (NADH dehydrogenase subunit	6.00E-05	Q642W1_RIFPA	NADH dehydrogenase subunit 4 (Fragment)	1.00E-04	Q699N1_SCHGA	NADH dehydrogenase subunit 4	1.00E-04
CD092012	Q622R1_CAEBR	Hypothetical protein CBG02060	0.85	Q8I561_PLAF7	Hypothetical protein	2.5	Q492W7_BLOPB	Putative periplasmic protein	9.4	Q8MPY5_CAEEL	Uncoordinated protein 2, isoform c	9.4	Q8IBH6_PLAF7	Hypothetical protein PF07_0118	9.4
CONTIG6910	Q6QAN4_9HYME	70 kDa heat shock cognate protein (Fragment)	1.00E-41	Q8N0P2_BOMMO	Heat shock cognate protein	2.00E-41	Q3LF65_MYTGA	Heat shock cognate 71	2.00E-41	Q3LF64_MYTGA	Heat shock cognate 70 (Fragment)	2.00E-41	Q5MGD5_LONON	Heat shock protein 4 heat shock cognate 70 protein	4.00E-41		binding GO:0005488	physiological process GO:0007582,cellular process GO:0009987,response to stimulus GO:0050896
CD136071	Q5KKF7_CRYNE	Chaperone regulator, putative	4.00E-07	Q55VT2_CRYNE	Hypothetical protein	4.00E-07	Q7S4Z8_NEUCR	Hypothetical protein	5.00E-06	Q875E6_PODAN	Hypothetical protein Pa5G0039	2.00E-05	Q4PC93_USTMA	Hypothetical protein	1.00E-04
CD086217	Q69P59_ORYSA	Hypothetical protein OJ1740_D06.20	0.6	Q4DIN2_TRYCR	Hypothetical protein	0.78
CONTIG4025	Q26080_PLAMG	Myosin heavy chain	7.00E-28	Q26079_PLAMG	Myosin heavy chain	7.00E-28	Q9U7E3_PECMA	Myosin heavy chain	9.00E-28	Q9NJ23_AEQIR	Myosin heavy chain striated muscle specific isoform (Fragment)	9.00E-28	Q9NJ22_AEQIR	Myosin heavy chain catch (Smooth) muscle specific isoform (Fragment)	9.00E-28			development GO:0007275,cellular process GO:0009987
CD086291	Q19901_CAEEL	Hypothetical protein hum-1	2.00E-06	Q17382_CAEEL	Hum-1 (Fragment)	2.00E-06	Q59LF3_CANAL	Potential regulator of cytoskeleton and endocytosis Rvs167	5.00E-06	Q9VIF7_DROME	CG1099-PA, isoform A	8.00E-06	Q8INU2_DROME	CG1099-PB, isoform B	8.00E-06
CONTIG7032	Q9SPA1_LILLO	Elongation factor-1 alpha 3	1.00E-12	EF1A_VICFA	Elongation factor 1-alpha (EF-1-alpha)	2.00E-12	EF1A_PEA	Elongation factor 1-alpha (EF-1-alpha)	2.00E-12	Q86LI9_9EUKA	Elongation factor-1 alpha (Fragment)	2.00E-12	Q86LI8_9EUKA	Elongation factor-1 alpha (Fragment)	2.00E-12		binding GO:0005488	physiological process GO:0007582, cellular process GO:0009987
CD088995	Q75DJ5_ASHGO	ABR027Cp	4.00E-06	Q55S44_CRYNE	Hypothetical protein	3.00E-04	Q5YFF8_9VIRU	Hypothetical protein	4.00E-04	Q6QU58_THIBE	HMW glutenin subunit	6.00E-04	Q7Y0S6_TAECM	HMW-glutenin	7.00E-04
Contig4959		UNKNOWN 2831	OM0023363-AOP
CD136181	Q4Q9W4_LEIMA		28.5 (62), Expect(2) = 0.26	Q4TF33_TETNG	Chromosome undetermined SCAF4873, whole	28.9 (63), Expect(2) = 0.29	Q4RCU1_TETNG	Chromosome undetermined SCAF18087, whole	28.5 (62), Expect(2) = 0.48	Q3UEM2_MOUSE	Adult male liver tumor cDNA, RIKEN full-length enriched library, clone:C730015B1	28.5 (62), Expect(2) = 0.61	Q3TU65_MOUSE	15 days embryo head cDNA, RIKEN full-length enriched library, clone:4022404I08 p	27.7 (60), Expect(2) = 0.65
CD093490	ATC_ARTSF	Calcium-transporting ATPase sarcoplasmic/endoplasmic reticulum type (EC 3.6.3.8	5.00E-12	Q8I897_PORSC	Smooth endoplasmic reticulum calcium ATPase	1.00E-11	O17315_PROCL	Sarco/endoplasmic reticulum Ca2+-ATPase	1.00E-11	Q49LV5_PANAR	SERCA Ca(2+)-ATPase pump	2.00E-11	O96527_SCHMA	Calcium ATPase 2	4.00E-11	cell GO:0005623	transporter activity GO:0005215, binding GO:0005488	physiological process GO:0007582,cellular process GO:0009987
CONTIG4171	Q9P105_HUMAN	Hypothetical protein (TSNAXIP1 protein)	4.00E-19	Q9DA98_MOUSE	Adult male testis cDNA, RIKEN full-length enriched library, clone:1700016K08 pro	3.00E-17	Q99P25_MOUSE	Trax-interacting protein 1 (Fragment)	3.00E-17	Q497Q4_MOUSE	Tsnaxip1 protein	9.00E-15	Q4FYT9_LEIMA	Hypothetical protein	6.00E-04
CD145338	Q503Z0_BRARE	Hypothetical protein zgc:110003	2.00E-19	Q6P3J1_BRARE	Tumor protein D52-like 2, isoform 2	1.00E-17	Q66IY0_XENLA	MGC84190 protein	1.00E-17	Q3TUJ9_MOUSE	12 days embryo head cDNA, RIKEN full-length enriched library, clone:3010095B17 p	7.00E-17	Q68E05_HUMAN	Hypothetical protein DKFZp686A1765 (OTTHUMP00000031615)	9.00E-17		binding GO:0005488
CONTIG3563	Q9AVH2_PEA	Putative senescence-associated protein (Fragment)	3.00E-05	Q5B2I5_EMENI	Predicted protein	0.036
CD092420	Q7SEC0_NEUCR	Predicted protein	5.8	Q5FKN3_LACAC	Transcriptional regulator	9.9
CD089188	Q5A1M4_CANAL	Potential zinc RING finger protein	0.048	Q9GTY2_TETTH	Integrase-like protein	0.14	Q5JJA2_PYRKO	Chromosome segregation ATPase	0.18	Q8K427_RAT	Liver regeneration-related protein 2 (Fragment)	0.24	Q7TQ13_RAT	Aa1076	0.24
CD136187
CONTIG3308
CONTIG3825	O97339_9BILA	Cytoplasmic intermediate filament protein	1.00E-22	Q17049_9BILA	Cytoplasmic intermediate filament protein	1.00E-21	IFEB_ASCSU	Intermediate filament protein B (IF-B)	1.00E-21	IFB1_CAEEL	Intermediate filament protein ifb-1 (Intermediate filament protein B1) (IF-B1) (	2.00E-21	IFA1_CAEEL	Intermediate filament protein ifa-1 (Intermediate filament protein A1) (IF-A1) (	3.00E-21		structural molecule activity GO:0005198,binding GO:0005488
CD141219	O57336_PETMA	Polyadenylate binding protein	3.00E-12	Q6DEY7_XENTR	MGC89376 protein	9.00E-12	Q6GR16_XENLA	MGC81363 protein	1.00E-11	Q7T3G5_BRARE	Poly(A) binding protein, cytoplasmic 4 (Inducible form)	1.00E-11	Q98SP8_XENLA	Embryonic poly(A) binding protein	2.00E-11	cell GO:0005623, envelope GO:0031967, organelle GO:0043226	binding GO:0005488	physiological process GO:0007582,cellular process GO:0009987,regulation of biological process GO:0050789
CD138238	Q5SPK7_BRARE	Novel protein similar to human talin 2 (TLN2) (Fragment)	0.53	Q9CS79_MOUSE	8 days embryo whole body cDNA, RIKEN full-length enriched library, clone:5730421	0.69	Q8CDM9_MOUSE	Adult male testis cDNA, RIKEN full-length enriched library, clone:4931402J01 pr	0.69	Q8CHG4_MOUSE	MKIAA0320 protein (Fragment)	0.69	Q6PB69_MOUSE	Tln2 protein (Fragment)	0.69
CONTIG4136	Q567A1_BRARE	Hypothetical protein zgc:112197	3.00E-42	Q7T1E0_BRARE	Glycerol-3-phosphate dehydrogenase 1 (Soluble)	2.00E-41	Q5I0F4_RAT	Glycerol-3-phosphate dehydrogenase 1 (Soluble)	6.00E-41	Q68AX4_BOMMO	Glycerol-3-phosphate dehydrogenase-1	6.00E-41	Q68AX3_BOMMO	Glycerol-3-phosphate dehydrogenase-2	6.00E-41	cell GO:0005623, envelope GO:0031967, organelle GO:0043226, protein complex GO:0043234	catalytic activity GO:0003824, binding GO:0005488	physiological process GO:0007582,cellular process GO:0009987
CD131825	RS23_LUMRU	40S ribosomal protein S23	1.00E-58	RS23_DERVA	40S ribosomal protein S23	6.00E-56	Q56FK0_9HYME	Ribosomal protein S23	4.00E-55	Q6XHD8_DROYA	Similar to Drosophila melanogaster CG8415 (Fragment)	4.00E-55	RS23_DROME	40S ribosomal protein S23	1.00E-54	cell GO:0005623,organelle GO:0043226, protein complex GO:0043234	structural molecule activity GO:0005198, binding GO:0005488	physiological process GO:0007582,cellular process GO:0009987
CD170956	Q4YL43_PLABE	Hypothetical protein (Fragment)	0.4	Q7RTF4_PLAYO	Hypothetical protein	0.4	Q4Y6N4_PLACH	Hypothetical protein (Fragment)	0.68	Q4XTB9_PLACH	Hypothetical protein (Fragment)	2	Q4YPQ5_PLABE	Hypothetical protein	3.4
CD137096	Q56J87_9BILA	AmphiHMG1/2-like protein (Fragment)	3.00E-17	Q32PT3_BRARE	Hypothetical protein	3.00E-14	Q544R9_MOUSE	Adult male olfactory brain cDNA, RIKEN full-length enriched library, clone:64304	9.00E-14	HMG4_MOUSE	High mobility group protein 4 (HMG-4) (High mobility group protein 2a) (HMG-2a)	9.00E-14	HMG4_CHICK	High mobility group protein 4 (HMG-4) (High mobility group protein 2a) (HMG-2a)	9.00E-14	cell GO:0005623, organelle GO:0043226	binding GO:0005488	physiological process GO:0007582,cellular process GO:0009987,regulation of biological process GO:0050789
CONTIG6515	Q91PS3_9VIRU	ORF1	9.3
CD089011	Q9VBX3_DROME	CG11844-PB, isoform B	4.00E-09	Q960D3_DROME	SD06613p (CG11844-PA, isoform A) (Cg11844-pc, isoform c)	4.00E-09	Q8T4R6_AEDAE	Putative mRNA binding protein	2.00E-08	Q95PA7_AEDAE	Putative RNA-binding protein	3.00E-08	Q8T4R7_AEDAE	Putative mRNA binding protein	3.00E-08
CD145347	Q4UC72_THEAN	Hypothetical protein	1.2	Q4MZY5_THEPA	Hypothetical protein	5.7	Q4X3D1_PLACH	Hypothetical protein (Fragment)	7.5	Q9XUU9_CAEEL	Hypothetical protein	7.5	Q8IEH2_PLAF7	Hypothetical protein PF13_0080	7.5
SMLA15A07	Q9CS63_MOUSE	8 days embryo whole body cDNA, RIKEN full-length enriched library, clone:5730511	1.00E-49	Q8K2T8_MOUSE	Paf1, RNA polymerase II associated factor, homolog (Adult pancreas islet cells c	1.00E-49	Q3UY97_MOUSE	Adult male olfactory brain cDNA, RIKEN full-length enriched library, clone:64304	1.00E-49	Q9JJ99_MOUSE	Mus musculus brain cDNA, clone MNCb-6444, similar to Homo sapiens cDNA FLJ11123,	1.00E-49	Q4V886_RAT	Hypothetical protein RGD1306219_predicted	1.00E-49
CD140576	Q56J87_9BILA	AmphiHMG1/2-like protein (Fragment)	2.00E-14	Q32PT3_BRARE	Hypothetical protein	4.00E-11	HMG4_CHICK	High mobility group protein 4 (HMG-4) (High mobility group protein 2a) (HMG-2a)	7.00E-11	Q32NS7_XENLA	Hypothetical protein	1.00E-10	Q8AVU3_XENLA	MGC52825 protein	1.00E-10		binding GO:0005488	physiological process GO:0007582,cellular process GO:0009987,regulation of biological process GO:0050789
CD075143	Q43V88_SOLUS	Glycoside hydrolase, family 3, N-terminal:Glycoside hydrolase, family 3, C-termi	0.006	Q43W05_SOLUS	Glycoside hydrolase, family 3, N-terminal:Glycoside hydrolase, family 3, C-termi	0.011	Q8GJ42_CLOSR	Beta-xylosidase B (EC 3.2.1.37)	0.031	Q65EZ4_BACLD	Hypothetical protein (Putative Glycoside Hydrolase Family 3)	0.089	Q8PI22_XANAC	Glucan 1,4-beta-glucosidase	0.15
CD094200	Q9U5E6_9BILA	Pf-Dlx	1.2	Q7RYW5_NEUCR	Predicted protein	1.6	Q8J1D5_9LECA	Beta-tubulin (Fragment)	1.6	Q82RF0_STRAW	Hypothetical protein	2	Q50XV3_ENTHI	Ras guanine nucleotide exchange factor, putative	2
CD086752	Q9D0V5_MOUSE	18-day embryo whole body cDNA, RIKEN full-length enriched library, clone:1110065	6.00E-15	Q8BXS1_MOUSE	Adult retina cDNA, RIKEN full-length enriched library, clone:A930011E11 product:	6.00E-15	Q80UX8_MOUSE	1110065L07Rik protein	6.00E-15	Q7L211_HUMAN	Hypothetical protein C13orf6 (OTTHUMP00000018692)	6.00E-15	Q96JX9_HUMAN	Hypothetical protein FLJ14906 (C13orf6 protein)	6.00E-15		catalytic activity GO:0003824
CD141677	Q8I0W9_PLAF7	Fatty acid desaturase	0.68	Q48611_9LACT	Hypothetical protein	1.2	Q8I475_PLAF7	Hypothetical protein PFE0125w	2	Q4GYE3_9TRYP	Hypothetical protein	2.6	Q9KJ09_LACLA	Hypothetical protein	4.4
CD141253	SRP_SOYBN	8.4 kDa sulfur-rich protein precursor (SE60 protein) (Probable proteinase inhibi	0.53	Q8F339_LEPIN	TPR-repeat-containing protein	3.5	Q72SH4_LEPIC	Hypothetical protein	3.5	Q9MB66_TOBAC	Thionin like protein	7.7
CD091438	K1576_MOUSE	Probable oxidoreductase KIAA1576 (EC 1.-.-.-)	4.00E-21	K1576_HUMAN	Probable oxidoreductase KIAA1576 (EC 1.-.-.-)	1.00E-20	Q5R480_PONPY	Hypothetical protein DKFZp459D012	2.00E-20	Q4SIB0_TETNG	Chromosome 5 SCAF14581, whole genome shotgun sequence. (Fragment)	4.00E-20	Q4S935_TETNG	Chromosome 3 SCAF14700, whole genome shotgun sequence. (Fragment)	2.00E-19		catalytic activity GO:0003824, binding GO:0005488
CD139888	Q7QHN5_ANOGA	ENSANGP00000008260 (Fragment)	3.00E-08	Q8IMA6_DROME	CG32000-PA, isoform A (Cg32000-pb, isoform b)	2.00E-07	Q7KQN3_DROME	CG32000-PG, isoform G	2.00E-07	YBF7_CAEEL	Probable cation-transporting ATPase K07E3.7 in chromosome X (EC 3.6.3.-)	1.00E-05	Q4VNC0_HUMAN	Cation-transporting P5-ATPase	4.00E-05
CD094128
CONTIG4035	Q8MP30_DICDI	Hypothetical protein (Similar to Plasmodium lophurae. Histidine-rich glycoprotei	2.00E-04	Q26056_PLALO	Histidine-rich protein (Fragment)	9.00E-04	Q55F35_DICDI	Hypothetical protein	0.01	HRPX_PLALO	Histidine-rich glycoprotein precursor	0.01	Q7ZY91_XENLA	MGC53818 protein	0.016
CD136159	Q4NZ09_9DELT	Acetyl-CoA hydrolase/transferase	0.003	Q4ANT1_9CHLB	Acetyl-CoA hydrolase/transferase	0.012	Q3B135_PELLU	4-hydroxybutyrate coenzyme A transferase	0.021	Q3GJ26_CHLVI	Acetyl-CoA hydrolase/transferase	0.021	Q3VTR9_PROAE	Acetyl-CoA hydrolase/transferase	0.036
CD141526	Q8T046_DROME	LD29476p	2.00E-09	Q86BK8_DROME	CG4212-PB, isoform B	2.00E-09	Q86BK7_DROME	CG4212-PC, isoform C	2.00E-09	O18336_DROME	CG4212-PA, isoform A (Rab14 protein)	2.00E-09	Q7ZVX4_BRARE	RAB14, member RAS oncogene family	3.00E-09		binding GO:0005488	physiological process GO:0007582,cellular process GO:0009987
CD192712
CD090664	Q4RXT3_TETNG	Chromosome 11 SCAF14979, whole genome shotgun sequence	7.00E-04	Q5RCD3_PONPY	Hypothetical protein DKFZp459F0633	7.00E-04	UBP4_HUMAN	Ubiquitin carboxyl-terminal hydrolase 4 (EC 3.1.2.15) (Ubiquitin thiolesterase 4	7.00E-04	Q921M8_MOUSE	Usp4 protein	0.001	Q8BTL9_MOUSE	B6-derived CD11 +ve dendritic cells cDNA, RIKEN full-length enriched library, cl	0.001
CD136009	Q4DS85_TRYCR	Hypothetical protein	3.5	Q4YTT7_PLABE	Asparagine-rich antigen, putative (Fragment)	5.9
CD145034	Q5UEI1_9HIV1	Gag protein	2	Q4PGF7_USTMA	Hypothetical protein	2.6	Q3U4Z0_MOUSE	2 days neonate thymus thymic cells cDNA, RIKEN full-length enriched library, clo	9.9	Q3TUC6_MOUSE	Adult male brain cDNA, RIKEN full-length enriched library, clone:3526405E16 prod	9.9	Q4XTX8_PLACH	Hypothetical protein (Fragment)	9.9
CD093986	Q7Q172_ANOGA	ENSANGP00000013300 (Fragment)	3.00E-12	Q7Z3L5_HUMAN	Hypothetical protein DKFZp686H0688	4.00E-07	Q8CCV0_MOUSE	Adult male medulla oblongata cDNA, RIKEN full-length enriched library, clone:63	1.00E-06	Q6PCN2_MOUSE	Ankyrin 2, brain	1.00E-06	Q574D8_RAT	Ankyrin G197	2.00E-06	cell GO:0005623, organelle GO:0043226	binding GO:0005488	cellular process GO:0009987
CONTIG6884	Q6BZ58_DEBHA	Similar to sp|P38344 Saccharomyces cerevisiae YBR267w	1.4	Q36FT5_9GAMM	Putative type I restriction enzyme, S subunit	5.2
CD138792	Q70MT4_CRAGI	Ribosomal protein S10	5.00E-05	Q7SZU3_XENLA	Rps10-prov protein	0.003	Q5M9K7_MOUSE	Ribosomal protein S10 (5 days embryo whole body cDNA, RIKEN full-length enriched	0.004	RS10_RAT	40S ribosomal protein S10	0.004	RS10_MOUSE	40S ribosomal protein S10	0.004
CONTIG3643	Q7ZVN5_BRARE	Signal recognition particle 54	4.00E-62	Q4TBV6_TETNG	Chromosome undetermined SCAF7089, whole genome shotgun sequence. (Fragment)	4.00E-61	Q6P862_XENTR	Signal recognition particle 54	1.00E-60	Q3UWX8_MOUSE	In vitro fertilized eggs cDNA, RIKEN full-length enriched library, clone:7420449	1.00E-60	SRP54_RAT	Signal recognition particle 54 kDa protein (SRP54)	1.00E-60	cell GO:0005623, protein complex GO:0043234	catalytic activity GO:0003824, transporter activity GO:0005215, binding GO:0005488	physiological process GO:0007582,cellular process GO:0009987
CONTIG6516	ATP5L_PONPY	ATP synthase g chain, mitochondrial (EC 3.6.3.14) (ATPase subunit G)	2.00E-18	ATP5L_HUMAN	ATP synthase g chain, mitochondrial (EC 3.6.3.14) (ATPase subunit G)	2.00E-18	Q3T0C5_BOVIN	Hypothetical protein	5.00E-18	ATP5L_BOVIN	ATP synthase g chain, mitochondrial (EC 3.6.3.14) (ATPase subunit G)	5.00E-18	Q4SYM1_TETNG	Chromosome undetermined SCAF12021, whole genome shotgun sequence	6.00E-18	cell GO:0005623, protein complex GO:0043234	catalytic activity GO:0003824, transporter activity GO:0005215	physiological process GO:0007582,cellular process GO:0009987
CONTIG3627	Q7QCR9_ANOGA	ENSANGP00000022073 (Fragment)	9.00E-14	Q8R5B7_MOUSE	General transcription factor IIF polypeptide 1 (74kD subunit)	2.00E-10	Q8BVJ2_MOUSE	Adult male medulla oblongata cDNA, RIKEN full-length enriched library, clone:633	2.00E-10	Q6AY96_RAT	General transcription factor IIF, polypeptide 1, 74kDa	2.00E-10	Q3THK3_MOUSE	CRL-1722 L5178Y-R cDNA, RIKEN full-length enriched library, clone:I730071A03 pro	2.00E-10		binding GO:0005488
CD135036	Q4Q058_LEIMA	Delta8 fatty acid desaturase-like protein	8.00E-29	Q61YM0_CAEBR	Hypothetical protein CBG03479	4.00E-15	Q61YL9_CAEBR	Hypothetical protein CBG03480	4.00E-15	Q9XTB7_CAEEL	Delta5-fatty acid desaturase (Hypothetical protein fat-4)	7.00E-15	Q23221_CAEEL	Hypothetical protein fat-3	2.00E-14	cell GO:0005623	catalytic activity GO:0003824	physiological process GO:0007582,cellular process GO:0009987
CD082446	Q8QN36_COWPX	VHR1 or CPXV025 protein	6.7	VHR1_COWPX	Host range protein 1	6.7
CD144370	Q4RED8_TETNG	Chromosome 10 SCAF15123, whole genome shotgun sequence. (Fragment)	0.004	Q568H2_BRARE	Hypothetical protein zgc:110300	0.006	Q4P1Z3_USTMA	Hypothetical protein	0.037	CN112_PONPY	Protein C14orf112 homolog precursor	0.11	CN112_HUMAN	Protein C14orf112 precursor	0.11
CD131311	Q9R095_RAT	KPL2	2.00E-09	Q95LW1_MACFA	Hypothetical protein (Fragment)	7.00E-09	Q9C093_HUMAN	KIAA1770 protein (Fragment)	3.00E-08	Q9H5C7_HUMAN	Hypothetical protein FLJ23577	5.00E-04	Q7N0W1_PHOLL	Type III secretion component protein SctO	0.69
CD131753	Q4S3Q5_TETNG	Chromosome 17 SCAF14747, whole genome shotgun sequence. (Fragment)	2.00E-20	Q3UNI1_MOUSE	Nullipotent stem cell CRL-2070 NE cDNA, RIKEN full-length enriched library, clon	3.00E-20	Q53Z05_MOUSE	Sir2alpha	3.00E-20	Q2XNF6_HUMAN	Sirtuin (Silent mating type information regulation 2 homolog) 1 (S. cerevisiae)	3.00E-20	SIRT1_MOUSE	NAD-dependent deacetylase sirtuin-1 (EC 3.5.1.-) (SIR2alpha) (mSIR2a) (Sir2) (SI	3.00E-20	cell GO:0005623, membrane-enclosed lumen GO:0031974, organelle GO:0043226, protein complex GO:0043234, development GO:0007275	binding GO:0005488	physiological process GO:0007582,cellular process GO:0009987,regulation of biological process GO:0050789
CD145480	Q88PP4_PSEPK	Protein secretion ABC efflux system, permease and ATP-binding protein	7.2
Contig6626		UNKNOWN 4089	OM0023344-AOP														catalytic activity GO:0003824, binding GO:0005488	physiological process GO:0007582,cellular process GO:0009987
CONTIG3828	Q94985_HIRME	Alpha-1 tubulin	e-162	Q4V850_XENLA	Tuba1 protein (Hypothetical protein)	e-161	Q52L87_MOUSE	Tubulin, alpha 6 (Blastocyst blastocyst cDNA, RIKEN full-length enriched library	e-161	Q53GA7_HUMAN	Tubulin alpha 6 variant (Fragment)	e-161	TBA6_RAT	Tubulin alpha-6 chain (Alpha-tubulin 6)	e-161	cell GO:0005623, organelle GO:0043226, protein complex GO:0043234	catalytic activity GO:0003824, structural molecule activity GO:0005198, binding GO:0005488	physiological process GO:0007582,cellular process GO:0009987
CD092446	Q8IAL8_PLAF7	Hypothetical protein MAL8P1.154	0.4
CONTIG6464	RL12_SCHPO	60S ribosomal protein L12	6.00E-23	Q308B0_SOLTU	Hypothetical protein	1.00E-22	Q56GW1_HYDEC	60S ribosomal protein L12 (Fragment)	1.00E-22	Q3LRD5_BRABE	Ribosomal protein L12 (Fragment)	2.00E-22	Q9NFW1_HYDAT	L12 ribosomal protein	4.00E-22	cell GO:0005623, organelle GO:0043226, protein complex GO:0043234	structural molecule activity GO:0005198	physiological process GO:0007582,cellular process GO:0009987
CONTIG3730	Q6P6Z5_XENLA	MGC68565 protein	4.00E-46	Q8T881_CIOIN	Axonemal p66.0	6.00E-45	Q5U3R2_BRARE	Zgc:101737	6.00E-39	Q8LGS5_CHLRE	Outer dynein arm docking complex protein ODA1	1.00E-27	Q8NA47_HUMAN	Hypothetical protein FLJ35843	9.00E-22		binding GO:0005488

## Sheet: 2304 all indirect
Common	hit1id_lrge	hit1name_lrge	hit1evalue	hit2id	hit2name	hit2evalue	hit3id	hit3name	hit3evalue	hit4id	hit4name	hit4evalue	hit5id	hit5name	hit5evalue			Male or Female
CD086419																		F
CD069148	Q8I594_PLAF7	Hypothetical protein	0.24	Q8IEN1_PLAF7	Hypothetical protein MAL13P1.39	2.6	Q5DGX8_SCHJA	Hypothetical protein	5.9									F
CONTIG12187																		F
SMLA24B12																		F
CD095971	Q4QQE8_SCHMA	Endonuclease-reverse transcriptase	2.00E-04	Q5BQT0_SCHJA	SJCHGC09821 protein	0.009	Q5BT64_SCHJA	SJCHGC02633 protein (Fragment)	0.009	Q5DGI4_SCHJA	SJCHGC03084 protein	0.027	Q5BSE4_SCHJA	SJCHGC04778 protein (Fragment)	0.035			F
CF499598	Q4QQE8_SCHMA	Endonuclease-reverse transcriptase	8.00E-47	Q5C264_SCHJA	SJCHGC06886 protein (Fragment)	2.00E-44	Q5BSY2_SCHJA	SJCHGC03063 protein	2.00E-16	Q5TRM3_ANOGA	ENSANGP00000027774 (Fragment)	1.00E-13	Q5TRD1_ANOGA	ENSANGP00000028171 (Fragment)	2.00E-13			F
Contig3392		UNKNOWN 2086	OM0023364-AOP															F
CONTIG8189	Q5BX83_SCHJA	SJCHGC03156 protein (Fragment)	5.00E-10															F
CD112348	Q8I271_PLAF7	Hypothetical protein PFA0350c	7.6															F
AI559041	Q8I3H1_PLAF7	Hypothetical protein PFE1480c	1.6	Q7QC20_ANOGA	ENSANGP00000014976 (Fragment)	2.7	Q4XSF3_PLACH	Hypothetical protein	6.1	Q8I2Y8_PLAF7	Hypothetical protein PFI0805w	7.9						F
CD133063	Q54UV8_DICDI	SAP DNA-binding domain-containing protein	0.14	Q54UW0_DICDI	SAP DNA-binding domain-containing protein	0.53	Q54UV9_DICDI	SAP DNA-binding domain-containing protein	0.53	Q8H820_ORYSA	Hypothetical protein OJ1743A09.7	0.9	Q54CA7_DICDI	Hypothetical protein	2			F
>CL1300	Q81CS4_BACCR	Methyltransferase (EC 2.1.1.-)	0.3	Q6CJR3_KLULA	Similarities with sgd|S0005592 Saccharomyces cerevisiae YOR066w hypothetical pro	0.3	Q6HI58_BACHK	Possible transcriptional regulator, MerR family	0.39	Q9W2X8_DROME	CG15311-PA	0.88	Q81PX8_BACAN	Conserved domain protein	2.6			F
CD118007																		F
CD134920	Q8WYX9_HUMAN	Hypothetical protein pp10122	4.00E-04	Q6ZSA2_HUMAN	Hypothetical protein FLJ45698	0.006	Q6ZQS2_HUMAN	Hypothetical protein FLJ45585	0.007	Q6ZT59_HUMAN	Hypothetical protein FLJ44936	0.028	Q3UGM7_MOUSE	Melanocyte cDNA, RIKEN full-length enriched library, clone:G270069C18 product:hy	0.036			F
SMEGGPRO		S.MANSONI MRNA FOR EGGSHELL PROTEIN	OM0023338-AOP															F
Contig4929		UNKNOWN 2804	OM0023363-AOP															F
CD193296	Q4Z0T0_PLABE	Hypothetical protein (Fragment)	7.6															F
SMU66336		SCHISTOSOMA MANSONI SR1 NON-LTR RETROTRANSPOSON, INTERNAL FRAGMENT BS6, POL PSEU	OM0023337-AOP															F
CD065344	Q30KX0_SCHMA	Reverse transcriptase SR3-left (Fragment)	5.00E-06	Q30KW9_SCHMA	Reverse transcriptase SR3-right (Fragment)	7.00E-06	Q4QQE8_SCHMA	Endonuclease-reverse transcriptase	2.00E-05	Q5BT18_SCHJA	SJCHGC02983 protein	0.68	Q4F8Q3_AEDAE	Reverse transcriptase (Fragment)	2.6			F
CONTIG3343	O43032_SCHPO	SPBC3B9.03 protein	1.6	O65629_ARATH	Hypothetical protein T19K4.50 (Hypothetical protein AT4g35920)	5.9	Q5AI02_CANAL	Potential ARF GAP	7.7									F
CONTIG4602	Q6HN02_BACHK	Hypothetical protein	5.6	Q63FJ7_BACCZ	Group-specific protein	5.6												F
CD083940																		F
CONTIG3912																		F
CD134922																		F
>CL1169	Q4YPA6_PLABE	Hypothetical protein (Fragment)	4															F
CONTIG2873	Q86EW5_SCHJA	Clone ZZD1354 mRNA sequence	3.00E-59	Q5DF00_SCHJA	SJCHGC01836 protein	1.00E-58	Q4S937_TETNG	Chromosome 3 SCAF14700, whole genome shotgun sequence. (Fragment)	3.00E-04	Q4LDF5_CHICK	DEC-205 protein precursor	0.095	Q6WY07_BOVIN	DEC-205/CD205 protein	0.47			F
CD133238																		F
CD194055	Q86ET0_SCHJA	Clone ZZD1459 mRNA sequence	7.00E-04	Q5DG83_SCHJA	Hypothetical protein	7.00E-04	Q5DFL8_SCHJA	Hypothetical protein	7.00E-04									F
CD088142	COS9_YEAST	Protein COS9	3.4															F
CONTIG9592	O97283_PLAF7	Hypothetical protein MAL3P7.10	2.5	Q4DDC0_TRYCR	Hypothetical protein	3.2	O45806_CAEEL	Hypothetical protein str-19	5.5									F
CONTIG10814	Q8T5G5_SCHJA	Polyprotein	4.00E-14	Q8MWP9_SCHJA	Polyprotein (Fragment)	4.00E-14	Q5DBA5_SCHJA	SJCHGC09144 protein	2.00E-13	Q5C3A3_SCHJA	SJCHGC09318 protein (Fragment)	3.00E-09	Q4QQE8_SCHMA	Endonuclease-reverse transcriptase	9.00E-07			F
CD078705	Q4QQE8_SCHMA	Endonuclease-reverse transcriptase	2.00E-24	Q5BSV8_SCHJA	SJCHGC03153 protein	2.00E-07	Q5D9Z7_SCHJA	SJCHGC03074 protein	0.001	Q7VRW7_BLOFL	Ribonucleoside-diphosphate reductase 1 alpha chain (EC 1.17.4.1)	9.5	Q8N955_HUMAN	Hypothetical protein FLJ38343	9.5			F
CD167183	Q30T66_9HELI	Hydrophobe/amphiphile efflux-1 HAE1	9.2															F
CONTIG9695	Q88X18_LACPL	Integral membrane protein	4.4															F
CONTIG7123	Q5HSN0_CAMJR	Arsenical resistance operon repressor	0.2	Q4HFE8_CAMCO	Transcriptional regulator, ArsR family	0.58	Q5C679_SCHJA	SJCHGC09159 protein (Fragment)	2.2	Q503I6_BRARE	Hypothetical protein zgc:110566	3.8	Q9P388_NEUCR	Related to small s protein	6.4			F
Contig1832		UNKNOWN 854	OM0023327-AOP															F
CD067852	Q4SRR2_TETNG	Chromosome undetermined SCAF14500, whole genome shotgun sequence. (Fragment)	0.26	Q8BM82_MOUSE	12 days embryo embryonic body between diaphragm region and neck cDNA, RIKEN full	0.26	Q91XY4_MOUSE	Protocadherin gamma A4	0.26	Q80Y31_MOUSE	Protocadherin gamma subfamily A, 4	0.26	Q55CH1_DICDI	Hypothetical protein	0.26			F
Contig6628		UNKNOWN 4091	OM0023344-AOP															F
CD066573																		F
>CL376																		F
CD090184	Q6QI74_RAT	LRRG00134	0.009	Q99JC0_RAT	RRNA promoter binding protein	0.1												F
CD088356	Q33563_9TRYP	EATRO 164 kinetoplast (CR4)	1.7	Q7MSH4_WOLSU	Hypothetical protein	2.8	Q9LH48_ARATH	Arabidopsis thaliana genomic DNA, chromosome 3, BAC clone: T23B7	2.8	Q9C7D7_ARATH	Hypothetical protein F28J15.3 (At3g12180)	2.8	Q4YND5_PLABE	Hypothetical protein (Fragment)	2.8			F
CD067173	Q3DE09_STRAG	ABC transporter, permease protein, putative	0.18	Q3DBF8_STRAG	ABC transporter, permease protein, putative	0.18	Q8E2J1_STRA3	Hypothetical protein gbs2131	0.24	Q8DWP3_STRA5	ABC transporter, permease protein, putative	0.24	Q3DUE0_STRAG	Membrane protein, putative	0.24			F
CF499794	Q4QQE8_SCHMA	Endonuclease-reverse transcriptase	1.00E-52	Q30KX0_SCHMA	Reverse transcriptase SR3-left (Fragment)	7.00E-48	Q30KW9_SCHMA	Reverse transcriptase SR3-right (Fragment)	3.00E-47	Q5DEY9_SCHJA	SJCHGC02887 protein	4.00E-26	Q5BT18_SCHJA	SJCHGC02983 protein	4.00E-14			F
CD197541																		F
CD064743	Q517V8_ENTHI	Hypothetical protein	0.063	Q55DE8_DICDI	Hypothetical protein	0.11	Q556I3_DICDI	Hypothetical protein	0.18	Q54LR3_DICDI	Hypothetical protein	0.18	Q86K18_DICDI	Hypothetical protein	0.18			F
CD169745	Q8IAK0_PLAFA	Hypothetical protein PF00_0001 (Fragment)	0.18	Q4V797_RAT	Hypothetical protein RGD1309362_predicted	1.6												F
CONTIG7690	Q86FB7_SCHJA	Clone ZZD460 mRNA sequence	7.00E-65	Q9VQZ0_DROME	CG3652-PA (GH04132p)	7.00E-38	Q4S6H8_TETNG	Chromosome 10 SCAF14728, whole genome shotgun sequence. (Fragment)	1.00E-36	Q6IQ85_BRARE	Yip1 domain family, member 6	3.00E-36	Q7PNB1_ANOGA	ENSANGP00000021957	8.00E-36			F
>CL1335	Q4Z1D0_PLABE	Hypothetical protein (Fragment)	0.36	Q4YL64_PLABE	Hypothetical protein (Fragment)	0.36	Q4YF24_PLABE	Hypothetical protein (Fragment)	0.62	Q4XLK0_PLACH	Hypothetical protein (Fragment)	0.62	Q7RDS5_PLAYO	Hypothetical protein	1.4			F
CD075073	Q5DFA1_SCHJA	SJCHGC09643 protein	9.00E-14	Q5DC74_SCHJA	SJCHGC03047 protein	8.00E-13	Q5BX25_SCHJA	SJCHGC02965 protein (Fragment)	8.00E-13	Q5DBT1_SCHJA	SJCHGC02380 protein	3.00E-12	Q5DF86_SCHJA	SJCHGC03144 protein	4.00E-12			F
CD085279	Q5DDY1_SCHJA	SJCHGC08961 protein	5.00E-04	Q6IFU4_SCHMA	Gag protein	0.006	Q4QQE0_SCHMA	Endonuclease-reverse transcriptase	0.028									F
CD161137	Q4QQE8_SCHMA	Endonuclease-reverse transcriptase	2.00E-16	Q5BSV8_SCHJA	SJCHGC03153 protein	6.00E-05	Q5BT30_SCHJA	SJCHGC02932 protein (Fragment)	0.05	Q350E9_9GAMM	Hypothetical protein	0.33	Q34X86_9GAMM	Hypothetical protein	0.33			F
Contig5677		UNKNOWN 3354	OM0023349-AOP															F
CD065171	Q7KTG6_DROME	CG33298-PB, isoform B	2.6	Q7KTG5_DROME	CG33298-PA, isoform A	2.6	Q95S66_DROME	GM07803p	2.6	Q35809_YEAST	Endonuclease	7.6	RF3_SACBA	Maturase-like RF3 protein	7.6			F
CONTIG10333	Q3A9A1_CARHY	Putative methyl-accepting chemotaxis protein	7.5															F
CONTIG9170	Q5C0W1_SCHJA	SJCHGC08634 protein (Fragment)	5.00E-57	Q59FH1_HUMAN	Transformation/transcription domain-associated protein variant (Fragment)	0.033	TRRAP_HUMAN	Transformation/transcription domain-associated protein (350/400 kDa PCAF-associ	0.033	Q3UH32_MOUSE	CDNA, RIKEN full-length enriched library, clone:M5C1089N06 product:Transformati	0.043	Q3TIP5_MOUSE	CRL-1722 L5178Y-R cDNA, RIKEN full-length enriched library, clone:I730011D16 pro	0.043			F
CD124936	Q9VDV4_DROME	CG16718-PA, isoform A (LD10322p)	2.00E-34	Q8IN71_DROME	CG16718-PB, isoform B	2.00E-34	Q86P24_DROME	RE22501p (Fragment)	7.00E-34	Q7QEP9_ANOGA	ENSANGP00000008160 (Fragment)	2.00E-28	Q9VYS8_DROME	CG10353-PA, isoform A	1.00E-26			F
CONTIG6393	Q3U0E6_MOUSE	Activated spleen cDNA, RIKEN full-length enriched library, clone:F830109D05 prod	0.63	Q7TR82_MOUSE	Olfactory receptor Olfr1040	5.4	Q9FZ78_ARATH	F25I16.10 protein	7	Q6ZWI3_HUMAN	Hypothetical protein FLJ41036	7	Q3UE69_MOUSE	Bone marrow macrophage cDNA, RIKEN full-length enriched library, clone:G530012D1	9.2			F
SMLA40C06	Q26608_SCHMA	(Liberia) tandem repeat	0.98	Q25802_PLAFA	RpoD protein	4.8												F
CD115450	Q5BSA9_SCHJA	SJCHGC05208 protein	0.33	Q5BSC9_SCHJA	SJCHGC05010 protein (Fragment)	0.57	Q3CIE7_THEET	Pyruvate:ferredoxin (Flavodoxin) oxidoreductase	0.97	Q8T5G5_SCHJA	Polyprotein	2.2	Q5BT13_SCHJA	SJCHGC03000 protein (Fragment)	2.2			F
CD122334																		F
Contig1773		SIMILAR TO OUTER ARM DYNEIN LIGHT CHAIN 3 (3E-46) POSSIBLE ANTISENSE	OM0023329-AOP															F
CD169713	Q618G3_CAEBR	Hypothetical protein CBG14673	4.5	Q3VT98_PROAE	Hypothetical protein	9.9												F
CONTIG10353																		F
CONTIG1527	Q5BWE5_SCHJA	SJCHGC07593 protein (Fragment)	9.00E-40	Q4QJR4_HAEI8	HMW1A, high molecular weight adhesin 1	0.78	Q9RNI2_HAEIN	HmwA	0.78	Q5CUL4_CRYPV	Putative nucleoporin, FG-rich motifs within N-terminal region	1.7	Q17249_BOMMO	Urbain	1.7			F
CD130431																		F
CD143905																		F
CD194893																		F
Contig3547		UNKNOWN 2222	OM0023361-AOP															F
CD069377	Q86FA1_SCHJA	Clone ZZZ329 mRNA sequence	4.00E-28	Q86FC1_SCHJA	Clone ZZD391 mRNA sequence	4.00E-11	Q5DAI2_SCHJA	SJCHGC06407 protein	5.00E-10	Q5DEL7_SCHJA	SJCHGC02535 protein	6.00E-10	Q5BRB5_SCHJA	SJCHGC08770 protein (Fragment)	3.00E-08			F
Contig1714		SIMILAR TO POLYPROTEIN 3E-38 POSSIBLE ANTISENSE	OM0023329-AOP															F
CONTIG3121	Q5DEB3_SCHJA	Hypothetical protein	4.00E-46	Q5DGT4_SCHJA	SJCHGC01067 protein	9.00E-46	Q541C9_DROME	RE18955p	5.00E-35	TYSY_DROME	Thymidylate synthase (EC 2.1.1.45) (TS) (TSase)	5.00E-35	Q9NDD3_TRISP	Thymidylate synthase (EC 2.1.1.45)	3.00E-34			F
SMLA46A03	Q5DEB0_SCHJA	SJCHGC06777 protein	5.00E-04	Q4X2U2_PLACH	Hypothetical protein (Fragment)	6.9	Q9G8N7_NAEGR	Haem lyase	6.9									F
CD195114	Q6D6K5_ERWCT	Putative integrase (Fragment)	7.6															F
CD120841	Q5C6F8_SCHJA	SJCHGC07581 protein (Fragment)	5.00E-09	Q9FGW0_ARATH	Arabidopsis thaliana genomic DNA, chromosome 5, P1 clone:MMG1	4.5	Q7PTG4_ANOGA	ENSANGP00000009256 (Fragment)	5.9									F
CD202405	Q3CLN8_ALTAT	Metallophosphoesterase	0.69	Q4IT80_AZOVI	L-lactate permease precursor	10												F
Contig6596		UNKNOWN 4065	OM0023344-AOP	hypothetical	hypothetical													F
CD088090	Q420B6_DESHA	Membrane bound O-acyl transferase, MBOAT	2.6															F
CD126407	Q9PDB5_XYLFA	Glucosamine--fructose-6-phosphate aminotransferase	5.8	Q87DJ9_XYLFT	Glucosamine--fructose-6-phosphate aminotransferase	5.8	Q3R146_XYLFA	Glutamine-fructose-6-phosphate transaminase (Isomerizing) (EC 2.6.1.16)	5.8	Q3RHC9_XYLFA	Glutamine-fructose-6-phosphate transaminase (Isomerizing) (EC 2.6.1.16)	5.8	Q9CQ76_MOUSE	8 days embryo whole body cDNA, RIKEN full-length enriched library, clone:5730521	7.6			F
CONTIG10829	Q8T5G5_SCHJA	Polyprotein	1.00E-63	Q8MWP9_SCHJA	Polyprotein (Fragment)	1.00E-63	Q5C394_SCHJA	SJCHGC09145 protein (Fragment)	2.00E-62	Q5C3A3_SCHJA	SJCHGC09318 protein (Fragment)	2.00E-62	Q5C3A7_SCHJA	SJCHGC06937 protein (Fragment)	4.00E-49			F
CONTIG1568	O61567_HOMAM	Ryanodine receptor (Fragment)	1.00E-04	Q8TA74_HEMPU	Ryanodine receptor	2.00E-04	RY44_DROME	Ryanodine receptor 44F	0.002	Q5RGQ4_BRARE	Novel protein similar to vertebrate ryanodine receptor 3 (RYR3) (Fragment)	0.003	Q7PMK5_ANOGA	ENSANGP00000019607	0.003			F
>CL19	Q95LL2_MACFA	X-ray radiation resistance associated 1 protein	0.1	Q4Z2M2_PLABE	Protein serine/threonine phosphatase, putative	1.5	Q7RA97_PLAYO	Protein serine/threonine phosphatase alpha	1.5	Q9S728_ARATH	En/Spm-like transposon protein (Protodermal factor 1)	2	Q8MLC1_DROME	CG30084-PC, isoform C	2			F
CD202718	Q5DGM9_SCHJA	SJCHGC02902 protein	0.047	Q5BT13_SCHJA	SJCHGC03000 protein (Fragment)	0.081	Q5BSY9_SCHJA	SJCHGC03050 protein	0.18	Q5BSF5_SCHJA	SJCHGC04561 protein (Fragment)	2.6	Q5BSZ1_SCHJA	SJCHGC03044 protein	5.8			F
CONTIG9989	Q30KW9_SCHMA	Reverse transcriptase SR3-right (Fragment)	5.00E-18	Q30KX0_SCHMA	Reverse transcriptase SR3-left (Fragment)	1.00E-17	Q4QQE8_SCHMA	Endonuclease-reverse transcriptase	8.00E-15	Q5BSE4_SCHJA	SJCHGC04778 protein (Fragment)	2.00E-06	Q5D952_SCHJA	SJCHGC04954 protein	0.007			F
CONTIG2200	Q86EN8_SCHJA	Clone ZZD1582 mRNA sequence	e-144	Q7ZWZ0_XENLA	Vdac1-prov protein	3.00E-41	Q4SL59_TETNG	Chromosome 17 SCAF14563, whole genome shotgun sequence. (Fragment)	5.00E-41	Q3TIG8_MOUSE	CRL-1722 L5178Y-R cDNA, RIKEN full-length enriched library, clone:I730033I01 pro	6.00E-41	Q3THL7_MOUSE	CRL-1722 L5178Y-R cDNA, RIKEN full-length enriched library, clone:I730069I17 pro	1.00E-40			F
CD127704	Q6BIC1_DEBHA	Similarities with KLLA0E11957g Kluyveromyces lactis IPF 3058.1	2.1	Q5E0H5_VIBF1	Hypothetical protein	2.8	Q5LV61_SILPO	Polysaccharide biosynthesis protein	8	Q4FLT0_PELUB	Recombination protein O	8						F
CD111283	Q7N1S6_PHOLL	Unknown protein	0.24	O13788_SCHPO	SPAC17G6.10 protein	10												F
CONTIG9445																		F
Contig6916		UNKNOWN 4330	OM0023380-AOP															F
CD196132	Q4SKG8_TETNG	Chromosome 13 SCAF14566, whole genome shotgun sequence. (Fragment)	5.8															F
CD088132	Q6LXX0_METMP	Hypothetical protein	3.7	Q5C2I7_SCHJA	SJCHGC05133 protein (Fragment)	6.3												F
CONTIG1655	Q3IKC9_PSEHT	Putative basic aminoacid decarboxylase (Could be ornithine decarboxylase) (EC 4.	0.48	Q3PKY7_PARDE	TonB-dependent siderophore receptor precursor	5.3												F
CONTIG11601	Q8ILB8_PLAF7	Methionine aminopeptidase, type II, putative	4.8	Q6BVK2_DEBHA	Similar to CA2105|IPF10711 Candida albicans	4.8	Q7XYK5_CHLS6	Ribulose-1,5-bisphosphate carboxylase/oxygenase small subunit 2 (Fragment)	8.1	Q4Y0D5_PLACH	Hypothetical protein (Fragment)	8.1						F
CONTIG13326	Q5DHE4_SCHJA	SJCHGC04453 protein	2.00E-66	Q5DGU2_SCHJA	SJCHGC03760 protein	3.00E-40	Q8MUR6_SCHJA	IB1 protein	1.00E-37	Q8MPF1_TAESO	Hypothetical protein	3.00E-37	Q5DDH3_SCHJA	SJCHGC09059 protein	3.00E-36			F
CD094438	Q6FUD2_CANGA	Similar to sp|P38065 Saccharomyces cerevisiae YBL037w APL3	1.8	Q98RZ5_GUITH	Hypothetical protein orf419	4.1	Q4X2E1_PLACH	Hypothetical protein	6.9	Q7RGM8_PLAYO	Rhoptry protein, putative	6.9	Q7Q115_ANOGA	ENSANGP00000011811	9.1			F
CONTIG8904	Q9VSK5_DROME	CG6964-PB, isoform B	0.004	Q8T9N4_DROME	Transcriptional corepressor Atro	0.004	Q8IQA6_DROME	CG6964-PA, isoform A	0.004	Q86BH2_DROME	CG6964-PC, isoform C	0.004	Q7KUA8_DROME	CG6964-PD, isoform D	0.004			F
Contig4877		UNKNOWN 2758	OM0023339-AOP															F
CD123999	Q4PDT1_USTMA	Hypothetical protein	8.00E-62	Q5KHB7_CRYNE	Hypothetical protein	4.00E-43	Q55SY3_CRYNE	Hypothetical protein	4.00E-43	Q6CT46_KLULA	Kluyveromyces lactis strain NRRL Y-1140 chromosome C of strain NRRL Y-1140 of Kl	1.00E-37	Q6C9P3_YARLI	Yarrowia lipolytica chromosome D of strain CLIB122 of Yarrowia lipolytica	3.00E-37			F
CD068023	Q4TDM2_TETNG	Chromosome undetermined SCAF6166, whole genome shotgun sequence. (Fragment)	0.24	Q8UUM3_ORYLA	ReO_6 protein	1.6	Q9ZD78_RICPR	ALKALINE PHOSPHATASE SYNTHESIS SENSOR PROTEIN PHOR (PhoR)	4.5									F
CD091365	Q4QQF7_SCHMA	Gag-pol polyprotein	1.5	Q7MKL0_VIBVY	A protein	7.6	Q9XV34_CAEEL	Hypothetical protein	7.6									F
CD135919	Q7YVS3_9TRYP	Hypothetical protein	2.6															F
SMLA23G05	Q4YQZ5_PLABE	Hypothetical protein (Fragment)	7.3	Q4XMF2_PLACH	Hypothetical protein	9.5												F
Contig3227		SIMILAR TO POLYPROTEIN (8E-13)	OM0023334-AOP															F
CF498042	Q81X46_BACAN	Transposase, IS605 family	2.00E-13	Q732J6_BACC1	Transposase, IS605 OrfB family	1.00E-12	Q46219_CLOPE	IS1136 DNA (Fragment)	1.00E-12	Q331V1_9CAUD	Putative IS transposase (OrfB)	1.00E-12	Q4Z968_9CAUD	ORF021	2.00E-12			F
CONTIG11821	Q5T3F3_HUMAN	Regulatory factor X, 3 (Influences HLA class II expression) (Fragment)	0.025	Q5JTM2_HUMAN	Regulatory factor X, 3 (Influences HLA class II expression) (Fragment)	0.025	Q5U2M9_RAT	Regulatory factor X, 3 (Influences HLA class II expression) (Predicted)	4	Q4R3I8_MACFA	Testis cDNA clone: QtsA-16695, similar to human regulatory factor X, 3 (influenc	4	Q5T3F2_HUMAN	Regulatory factor X, 3 (Influences HLA class II expression) (Fragment)	4			F
CD132427	Q9VXX7_DROME	CG9095-PA (RE70412p)	5.8															F
CD202361	Q6FXL4_CANGA	Similar to sp|P25558 Saccharomyces cerevisiae YCL014w BUD3 budding protein	7.5	O96143_PLAF7	Hypothetical protein PFB0205c	9.8												F
CONTIG2547	Q62098_MOUSE	Mus musculus ORFs (putative primordial protein), complete cds	1.6	Q70NW8_9BILA	NADH dehydrogenase subunit 6	8.2												F
CONTIG1867																		F
CD122381	Q9N9D7_PARTE	Tubulin	7.6															F
Contig3949		SIMILAR TO GLYCINE AMIDINOTRANSFERASE (2E-51)	OM0023398-AOP															F
SMLA17D10	Q567F5_BRARE	Hypothetical protein zgc:112083	1.00E-04	Q6GMA7_XENLA	MGC81946 protein	2.00E-04	MIZF_HUMAN	MBD2-interacting zinc finger protein (Methyl-CpG-binding protein 2-interacting z	3.00E-04	Q4FK13_MOUSE	AA589481 protein	6.00E-04	MIZF_MOUSE	MBD2-interacting zinc finger protein (Methyl-CpG-binding protein 2-interacting z	6.00E-04			F
CD167274	Q5DDB7_SCHJA	SJCHGC09442 protein	2.00E-06	Q35YI1_9GAMM	Hypothetical protein	2	Q6GNL6_XENLA	MGC81017 protein	3.4	Q9VVJ0_DROME	CG7510-PA (LD04710p)	3.4	Q5J2V5_9CARY	Maturase K	4.5			F
CONTIG5544	Q8V1Y4_9POTY	Polyprotein	7.7															F
CD117207	Q4XVU2_PLACH	Hypothetical protein	5.9															F
CD183024	Q9TK17_9FABA	Maturase	7.6	Q8H978_9ROSI	Maturase K	9.9	Q767C7_9ROSI	Maturase K	9.9	Q767C4_9ROSI	Maturase K	9.9	Q4Z5C9_PLABE	Hypothetical protein (Fragment)	9.9			F
CD059862	Q5DFW8_SCHJA	SJCHGC01837 protein	4.00E-10	Q6LFL1_PLAF7	Cyclin dependent kinase binding protein, putative	0.53	Q4YHY2_PLABE	Methionyl-tRNA formyltransferase, putative (Fragment)	5.8	Q7RI62_PLAYO	Methionyl-tRNA formyltransferase homolog, putative	5.8	ASH2_SCHPO	Set1 complex component ash2 (Set1C component ash2) (COMPASS component ash2) (Com	5.8			F
CD136163	Q4UGQ0_THEAN	Eukaryotic translation initiation factor (EiF3 delta homologue), putative	7.7															F
CD076405	Q7RTK8_SCHMA	Reverse transcriptase	0.002	NU4M_PICCA	NADH-ubiquinone oxidoreductase chain 4 (EC 1.6.5.3) (NADH dehydrogenase subunit	0.036	Q34937_LEITA	MURF2 protein	0.061	Q7M450_LEITA	Cryptogene protein G1(ND9)	0.23	Q33563_9TRYP	EATRO 164 kinetoplast (CR4)	0.23			F
CD095109	Q6PYV3_SCHJA	Egg protein CP391B	0.001	Q18500_CAEEL	Hypothetical protein	0.002	Q5C204_SCHJA	SJCHGC02040 protein (Fragment)	0.012	Q5C2B6_SCHJA	SJCHGC09062 protein (Fragment)	0.021	Q6PYV2_SCHJA	Egg protein CP391S	0.036			F
>CL127	Q8IAQ7_PLAF7	Hypothetical protein PF08_0114	5.8	Q7RKX6_PLAYO	Synthetic antigen of P.falciparum, putative (Fragment)	7.6	Q8JJW3_9CLOS	Putative movement protein	9.9	Q8IAU8_PLAF7	Hypothetical protein MAL8P1.104	9.9						F
CONTIG2328	Q5DDI1_SCHJA	SJCHGC09029 protein	1.00E-13	Q5BYF7_SCHJA	SJCHGC08815 protein (Fragment)	7.00E-11	P91804_SCHMA	Tegumental antigen Sm20.8 (Tegumental protein Sm 20.8)	3.00E-08	Q86EV1_SCHJA	Clone ZZD1392 mRNA sequence	5.00E-07	Q3KZ56_SCHJA	SJCHGC07397 protein (Fragment)	2.00E-06			F
CONTIG5858	Q7NBU5_MYCGA	Predicted transposase	0.69	Q7NB53_MYCGA	Predicted transposase	0.69	Q7NB08_MYCGA	Predicted transposase	0.69	Q7NB07_MYCGA	Predicted transposase	0.69	Q8GHJ3_9MOLU	Putative transposase	0.69			F
Contig397		UNKNOWN 218 (POSSIBLE ANTISENSE)	OM0023398-AOP															F
CD131291	Q8I1Z6_PLAF7	Hypothetical protein PFD0160w	2.6	Q5DCY8_SCHJA	SJCHGC05151 protein	3.4	Q8RIN9_FUSNN	Murein hydrolase exporter	4.5	Q7P873_FUSNV	Murein hydrolase exporter	4.5	Q8ILC4_PLAF7	Hypothetical protein	5.9			F
CD131221																		F
SMLA29B10	Q6IFU1_SCHMA	Pol polyprotein	2.00E-85	Q5C1Q8_SCHJA	SJCHGC09633 protein (Fragment)	1.00E-40	Q6DU52_SCHMA	Polyprotein (Fragment)	2.00E-26	Q5TRC9_ANOGA	ENSANGP00000002241 (Fragment)	2.00E-12	Q76C95_DROSI	Hypothetical protein	1.00E-11			F
CONTIG12705	Q57SN2_SALCH	Putative permease	2.00E-43	Q8ZRJ1_SALTY	Putative permease	5.00E-30	Q26546_SCHMA	Carbonyl reductase-like protein trans-spliced	3.00E-12	Q5DEH8_SCHJA	SJCHGC00683 protein	5.00E-11	Q8UVJ2_ORENI	Carbonyl reductase-like 20beta-hydroxysteroid dehydrogenase	5.00E-05			F
CD148008																		F
CF497731	Q5C394_SCHJA	SJCHGC09145 protein (Fragment)	4.00E-06	Q8T5G5_SCHJA	Polyprotein	5.00E-06	Q8MWP9_SCHJA	Polyprotein (Fragment)	5.00E-06	Q5C3A3_SCHJA	SJCHGC09318 protein (Fragment)	7.00E-06	Q6BVW3_DEBHA	Similar to sp|P06115 Saccharomyces cerevisiae YGR088w CTT1 catalase T	0.9			F
CD140984	Q7RFU4_PLAYO	Ubiquitin carboxyl-terminal hydrolase family 2, putative	0.52															F
CD188430	Q5BSG6_SCHJA	SJCHGC04354 protein (Fragment)	0.003	Q8T5G5_SCHJA	Polyprotein	0.013	Q8MWP9_SCHJA	Polyprotein (Fragment)	0.013	Q5BSA3_SCHJA	SJCHGC05284 protein	0.036	Q3MJT3_SCHJA	SJCHGC05140 protein	0.048			F
CD128774																		F
CD200587	Q4P5U5_USTMA	Hypothetical protein	3.4	Q9SNW4_9POAL	Ribulose-1,5-bisphosphate carboxylase small subunit (EC 4.1.1.39) (Fragment)	9.8	Q9SAX1_AEGBI	Ribulose-1,5-bisphosphate carboxylase/oxygenase small subunit (Fragment)	9.8	Q5A8G3_CANAL	Potential anaphase promoting complex TPR repeat subunit Cdc27	9.8	Q5A897_CANAL	Potential anaphase promoting complex TPR repeat subunit Cdc27	9.8			F
SMLA25D07	Q9W6E2_BRARE	Frizzled protein	7.00E-24	FZD5_XENLA	Frizzled 5 precursor (Frizzled-5) (Fz-5) (Xfz5)	4.00E-23	Q9YI00_BRARE	Frizzled 8a protein (Frizzled homolog 8a)	1.00E-22	Q9W6E4_BRARE	Frizzled protein	1.00E-22	Q9PTT7_BRARE	Frizzled homolog	1.00E-22			F
SMLA49C01																		F
CD091894																		F
CD066407	Q5DCJ1_SCHJA	SJCHGC07483 protein	1.4	Q8IJ79_PLAF7	Hypothetical protein	3.1	Q8IAP1_PLAF7	Hypothetical protein MAL8P1.139	5.4	Q4YWT5_PLABE	Hypothetical protein (Fragment)	9.2						F
CD087545	Q9H7B7_HUMAN	Hypothetical protein FLJ21075	0.047	Q75MJ5_HUMAN	Hypothetical protein FLJ21075 (Fragment)	0.047	O15451_HUMAN	Proline and glutamic acid rich nuclear protein isoform (Fragment)	0.89	Q95LL4_MACFA	Hypothetical protein	1.2	FRAT1_MOUSE	Proto-oncogene FRAT1 (Frequently rearranged in advanced T-cell lymphomas) (Frat-	2			F
CONTIG3519	Q6ZSA2_HUMAN	Hypothetical protein FLJ45698	0.003	Q6BMT9_DEBHA	Similarities with CA5919|IPF8926.3 Candida albicans IPF8926.3	0.5	Q4T1Z9_TETNG	Chromosome undetermined SCAF10406, whole genome shotgun sequence. (Fragment)	1.1	Q6ZQS2_HUMAN	Hypothetical protein FLJ45585	1.5	Q2ZDH6_9GAMM	Hypothetical protein precursor	1.9			F
CD162956	Q8IJ38_PLAF7	DNA polymerase zeta catalytic subunit, putative	0.01	Q3H7G1_TRIER	Hypothetical protein	0.33	Q4Z7L1_PLABE	Hypothetical protein (Fragment)	0.73	Q8IER9_PLAF7	Hypothetical protein MAL13P1.25	0.73	Q7RRG0_PLAYO	Protein kinase domain, putative	0.95			F
CD061177	Q30KX0_SCHMA	Reverse transcriptase SR3-left (Fragment)	1.00E-09	Q30KW9_SCHMA	Reverse transcriptase SR3-right (Fragment)	2.00E-09	Q4QQE8_SCHMA	Endonuclease-reverse transcriptase	9.00E-09	Q5BT18_SCHJA	SJCHGC02983 protein	0.002	Q5DEY9_SCHJA	SJCHGC02887 protein	0.24			F
Contig3237		UNKNOWN 1942 POSSIBLE ANTISENSE	OM0023396-AOP	hypothetical	hypothetical													F
CD160719	Q54BP8_DICDI	Hypothetical protein	2															F
CD089229	Q9LSM9_ARATH	Serine carboxypeptidase II-like protein	0.4	O62356_CAEEL	Hypothetical protein	3.4	Q660C7_BORGA	Oligopeptide ABC transporter, permease protein	10	Q4XS29_PLACH	Hypothetical protein (Fragment)	10	Q3ZEH4_EPIFL	Hypothetical orf3	10			F
Contig4331		UNKNOWN 2745	OM0023402-AOP															F
CD178330	Q4N8X3_THEPA	Hypothetical protein	0.63	PA2I_CRODU	Gamma-phospholipase A2 inhibitor CNF precursor (Crotalus neutralizing factor) (C	1.4	Q4PP84_9HYME	Putative oxoglutarate dehydrogenase (Fragment)	3.1	Q7Q5L5_ANOGA	ENSANGP00000013033 (Ensangp00000025238)	4.1	Q7PIB4_ANOGA	ENSANGP00000024901	4.1			F
CONTIG10638	Q7RMF9_PLAYO	Hypothetical protein	0.25	Q7VRJ4_BLOFL	DNA polymerase I (EC 2.7.7.7)	6.1	Q7P564_FUSNV	Hypothetical protein	7.9									F
CD156365	Q3LX23_9HIV1	Envelope glycoprotein (Fragment)	7.5															F
CD147430	Q8I3T7_PLAF7	Hypothetical protein PFE0855c	2.6															F
CD189428	Q5XH75_XENLA	LOC397804 protein	0.19	NRP1_XENLA	Neuropilin-1 precursor (A5 protein) (A5 antigen)	0.19	Q6T870_BRARE	Neuropilin 1b	0.25	Q6T869_BRARE	Soluble neuropilin 1b	0.25	Q6RT22_BRARE	Neuropilin 1b	0.25			F
CONTIG7944	Q8IBU1_PLAF7	Zinc transporter, putative	1.9	NU2M_APILI	NADH-ubiquinone oxidoreductase chain 2 (EC 1.6.5.3) (NADH dehydrogenase subunit	1.9	Q492X5_BLOPB	Dihydrolipoamide succinyltransferase E2 component	2.5	Q8ND14_HUMAN	Hypothetical protein DKFZp547K146 (Fragment)	3.3	Q8N4L1_HUMAN	Hypothetical protein MGC33486	3.3			F
CD114754	Q4XEH8_PLACH	Hypothetical protein (Fragment)	7.5															F
CD069616	Q86FA1_SCHJA	Clone ZZZ329 mRNA sequence	2.00E-48	Q5DAI2_SCHJA	SJCHGC06407 protein	7.00E-14	Q86FC1_SCHJA	Clone ZZD391 mRNA sequence	1.00E-10	Q5DET2_SCHJA	SJCHGC02534 protein	2.00E-10	Q5DEL7_SCHJA	SJCHGC02535 protein	3.00E-04			F
CD098101	Q4YPX9_PLABE	Hypothetical protein (Fragment)	3.4	Q3CQA4_ALTAT	TPR repeat precursor	5.8	Q9YMY9_9HIV1	Envelope glycoprotein	9.9	Q8PVP0_METMA	Hypothetical protein MM1922	9.9						F
SMLA20D02																		F
Contig2233		UNKNOWN 1111	OM0023343-AOP															F
CD147577	Q4YRI5_PLABE	Hypothetical protein	4.5	Q7RJN3_PLAYO	Hypothetical protein (Fragment)	4.5	Q55EE3_DICDI	Hypothetical protein	5.8	Q54GI7_DICDI	Hypothetical protein (Fragment)	7.6						F
>CL264																		F
CONTIG2774	Q505M2_XENLA	Hypothetical protein	5.00E-04	Q585H6_9TRYP	Hypothetical protein	0.005	Q9Z6E5_LISMO	ATP-dependent protease ClpE	0.027	Q92D24_LISIN	ATP-dependent protease	0.046	Q99WZ3_STAAM	Staphylocoagulase	0.061			F
CD190721	Q7YT99_MYTGA	Twitchin	1.00E-06	Q9GSH3_HALRO	FGF receptor	1.00E-04	Q3UQZ6_MOUSE	12 days embryo spinal ganglion cDNA, RIKEN full-length enriched library, clone:D	9.00E-04	Q8VCD0_MOUSE	Kinase insert domain protein receptor	9.00E-04	VGFR2_MOUSE	Vascular endothelial growth factor receptor 2 precursor (EC 2.7.1.112) (VEGFR-2)	9.00E-04			F
CONTIG10449																		F
CD132777																		F
CD115556																		F
CD063095	Q5NMX0_ZYMMO	Hypothetical protein	2.6	Q73H31_WOLPM	Hypothetical protein	5.9												F
CD147614	Q4QQE8_SCHMA	Endonuclease-reverse transcriptase	3.00E-09	Q30KW9_SCHMA	Reverse transcriptase SR3-right (Fragment)	9.00E-09	Q30KX0_SCHMA	Reverse transcriptase SR3-left (Fragment)	3.00E-08	Q5BT18_SCHJA	SJCHGC02983 protein	0.028	Q7XVC3_ORYSA	OSJNBa0072D21.13 protein	2			F
CF501417	Q8MWP8_SCHJA	Polyprotein (Fragment)	5.00E-05	Q8T5G5_SCHJA	Polyprotein	8.00E-05	Q8MWP9_SCHJA	Polyprotein (Fragment)	8.00E-05	Q3MJT3_SCHJA	SJCHGC05140 protein	0.001	Q5BT13_SCHJA	SJCHGC03000 protein (Fragment)	0.001			F
SMLC35C09	Q4QQD3_SCHMA	Gag-pol polyprotein	8.00E-12	Q61LJ6_CAEBR	Hypothetical protein CBG08875	0.1	Q3R3G7_XYLFA	CagE, TrbE, VirB component of type IV transporter system	0.3	Q5LWL4_SILPO	Translation initiation factor IF-2	0.39	Q3F7Q7_9BURK	Hypothetical protein	0.51			F
CONTIG2980	Q5DDI2_SCHJA	SJCHGC08974 protein	0	Q658X6_HUMAN	Hypothetical protein DKFZp666D0510 (Fragment)	3.00E-59	Q7SXT8_BRARE	Transmembrane protein 68	4.00E-59	Q5U129_DROME	LP13185p	4.00E-59	Q9D850_MOUSE	Adult male small intestine cDNA, RIKEN full-length enriched library, clone:2010	4.00E-57			F
CONTIG1505	Q4QQF4_SCHMA	Gag-pol polyprotein	1.00E-39	Q5D8K5_SCHJA	SJCHGC02198 protein	5.00E-39	Q4QQF1_SCHMA	Gag-pol polyprotein	3.00E-35	O17342_CAEEL	Hypothetical protein	2.00E-32	P91422_CAEEL	Hypothetical protein	2.00E-31			F
Contig6523		SIMILAR TO DYNEIN LIGHT CHAIN 1, CYTOPLASMIC (8 KDA DYNIEN LIGHT CHAIN) 4E-23	OM0023371-AOP															F
CD201273	Q9VKA2_DROME	CG17217-PA	4.4	Q4QPV4_DROME	IP04757p (Fragment)	4.4	O13648_SCHPO	SPBC8D2.10c protein (EC 2.1.1.-)	7.6	Q7LWE1_SCHPO	Protein arginine N-methyltransferase	7.6	Q94Z19_PYLLI	Ribosomal protein S4	9.9			F
CD152815	Q5C243_SCHJA	SJCHGC03570 protein (Fragment)	0.032	Q9W2V9_DROME	CG2221-PA (LD40707p)	0.032	Q4SXP1_TETNG	Chromosome 6 SCAF12355, whole genome shotgun sequence	0.12	Q5C2B6_SCHJA	SJCHGC09062 protein (Fragment)	0.12	Q7Q2J8_ANOGA	ENSANGP00000020705 (Fragment)	0.21			F
CD182780	Q8MUR6_SCHJA	IB1 protein	9.00E-12	Q5DCV7_SCHJA	SJCHGC03072 protein	1.00E-11	Q686W9_9SCOR	CG10527-like methyltransferase (Fragment)	9.00E-04	Q686W5_9SCOR	CG10527-like methyltransferase (Fragment)	9.00E-04	Q686W4_9SCOR	CG10527-like methyltransferase (Fragment)	9.00E-04			F
CONTIG820	Q9B8H0_9NEOP	NADH dehydrogenase subunit 6	0.83	Q4HEI8_CAMCO	Probable integral membrane protein Cj0033	4.1												F
CD183117																		F
Contig1372		SIMILAR TO MYOSIN HEAVY CHAIN (0.0)	OM0023384-AOP															F
CONTIG9815	Q5C4I3_SCHJA	SJCHGC02661 protein (Fragment)	1.00E-43	Q4XY94_PLACH	Diaphanous homolog, putative (Fragment)	0.048	Q8IJK9_PLAF7	Hypothetical protein	1.5	Q49554_MYCHR	101 kDa protein precursor	2	YAD3_SCHPO	Hypothetical protein C4G8.03c in chromosome I	2			F
Contig3533		SIMILAR TO CG11430-PA (2E-21) POSSIBLE ANTISENSE	OM0023361-AOP															F
CD160736	Q8REW0_FUSNN	NA+/H+ antiporter NHAC	0.19	Q7P2V0_FUSNV	NA+/H+ antiporter NHAC	0.19	Q5CNA5_CRYHO	Hypothetical protein	1.6	Q5CRQ8_CRYPV	GPI1/PIG-Q like N-acetylglucosaminyl-phosphatidylinositol transferase involved i	2.8						F
CONTIG5783	O78879_9SAUR	NADH dehydrogenase subunit II	0.69	Q7RB04_PLAYO	Hypothetical protein	0.91												F
>CL928	Q86F86_SCHJA	Clone ZZD10 mRNA sequence	2.00E-27	Q5DHX7_SCHJA	SJCHGC01569 protein	5.00E-27	Q5DA03_SCHJA	SJCHGC09193 protein	6.00E-27	Q5DI27_SCHJA	SJCHGC06484 protein	1.00E-24	Q96L06_HUMAN	Hypothetical protein MGC26856	3.00E-18			F
CONTIG10968	Q5L404_GEOKA	DNA-directed RNA polymerase beta' subunit (EC 2.7.7.6)	1.00E-94	Q65PB4_BACLD	RpoC (RNA polymerase) (Beta subunit)	8.00E-90	RPOC_BACSU	DNA-directed RNA polymerase beta' chain (EC 2.7.7.6) (RNAP beta' subunit) (Tran	3.00E-88	Q73FA3_BACC1	DNA-directed RNA polymerase, beta' subunit (EC 2.7.7.6)	6.00E-88	Q6HPR5_BACHK	DNA-directed RNA polymerase, beta' subunit (EC 2.7.7.6)	6.00E-88			F
CD178149	Q4QQE8_SCHMA	Endonuclease-reverse transcriptase	3.00E-08	Q4HX29_GIBZE	Hypothetical protein	5.8	Q8YR34_ANASP	Type I restriction-modification enzyme R subunit	10									F
CD060678	Q4TB80_TETNG	Chromosome 17 SCAF7180, whole genome shotgun sequence. (Fragment)	10	Q8ZAS6_YERPE	Maltose-binding periplasmic protein (Periplasmic maltose-binding protein)	10	Q664X3_YERPS	ABC transporter, periplasmic maltose-binding protein malE precursor	10									F
>CL270	Q4RL51_TETNG	Chromosome 12 SCAF15023, whole genome shotgun sequence. (Fragment)	0.36	Q5XGT5_XENLA	LOC495146 protein	1.4	Q8MS17_DROME	RE53611p	1.4	PDE4E_DROME	cAMP-specific 3',5'-cyclic phosphodiesterase, isoform F (EC 3.1.4.17) (Learning/	1.4	PDE4D_DROME	cAMP-specific 3',5'-cyclic phosphodiesterase, isoform M (EC 3.1.4.17) (Learning/	1.4			F
CD201709																		F
CD086035																		F
CONTIG3789	Q3CKC5_THEET	Hypothetical protein	2.00E-08	Q3CK92_THEET	Hypothetical protein	2.00E-08	Q8CM04_COREF	Hypothetical protein	3.00E-08	Q3PEH8_PARDE	Hypothetical protein	3.00E-08	Q9RXQ4_DEIRA	Hypothetical protein DR0254	2.00E-06			F
CD085828	Q55AW1_DICDI	Hypothetical protein	0.81	Q8IEL1_PLAF7	Hypothetical protein PF13_0056	0.81	Q8I5J1_PLAF7	Hypothetical protein	1.1	Q49QY1_9MOLL	Tinman (Fragment)	1.4	Q8I5X3_PLAF7	Hypothetical protein	1.4			F
CD086552	Q64Z36_BACFR	Hypothetical protein	2	Q5LI30_BACFN	Hypothetical protein	2												F
CD085463	Q4QQE8_SCHMA	Endonuclease-reverse transcriptase	9.00E-06	Q5D9Z7_SCHJA	SJCHGC03074 protein	0.016	Q5BSV8_SCHJA	SJCHGC03153 protein	0.016									F
Contig7004		UNKNOWN 4411	OM0023380-AOP															F
Contig79		UNKNOWN 39	OM0023383-AOP															F
CONTIG9246	Q5C4W3_SCHJA	SJCHGC07968 protein (Fragment)	4.00E-04	Q4RER3_TETNG	Chromosome 13 SCAF15122, whole genome shotgun sequence. (Fragment)	2.6	Q3VS13_PROAE	RelA/SpoT	3.4	Q8GPT0_PSEAE	Hypothetical protein ORF SG72	4.4	Q9FND5_ARATH	Similarity to heat shock protein	4.4			F
>CL1156	Q5C3A3_SCHJA	SJCHGC09318 protein (Fragment)	6.00E-81	Q8T5G5_SCHJA	Polyprotein	3.00E-66	Q8MWP9_SCHJA	Polyprotein (Fragment)	3.00E-66	Q5C394_SCHJA	SJCHGC09145 protein (Fragment)	1.00E-59	Q5C3A7_SCHJA	SJCHGC06937 protein (Fragment)	3.00E-40			F
CD117072	Q81K36_BACAN	Sensor histidine kinase	2.6	Q72XJ8_BACC1	Sensor histidine kinase (EC 2.7.3.-)	2.6	Q6HB24_BACHK	Sensor histidine kinase (EC 2.7.3.-)	2.6	Q630Y9_BACCZ	Sensor histidine kinase (EC 2.7.3.-)	2.6	Q4MJI7_BACCE	Sensory box histidine kinase VicK, putative	2.6			F
CF496994	Q8KUH4_ACTPA	Polyketide synthase	5.2															F
CONTIG10886	Q8T5G5_SCHJA	Polyprotein	2.00E-36	Q8MWP9_SCHJA	Polyprotein (Fragment)	2.00E-36	Q5C3A3_SCHJA	SJCHGC09318 protein (Fragment)	3.00E-34	Q5C394_SCHJA	SJCHGC09145 protein (Fragment)	7.00E-33	Q5C3A7_SCHJA	SJCHGC06937 protein (Fragment)	7.00E-25			F
CONTIG3770	Q7S201_NEUCR	Predicted protein	0.003	Q587L7_ONCKE	Peroxisome proliferator-activated receptor gamma	0.021	Q587L5_ONCKE	Peroxisome proliferator-activated receptor gamma	0.048	Q9VWE5_DROME	CG14223-PA	0.062	Q6TYQ3_COLGU	Sperm ion channel (Fragment)	0.11			F
CD125968	Q5C3E3_SCHJA	SJCHGC04366 protein (Fragment)	1.2	Q54P15_DICDI	Hypothetical protein	9.9												F
CD085451	Q891U0_CLOTE	Protease (EC 3.4.-.-)	0.69	Q4Y916_PLACH	Hypothetical protein (Fragment)	0.9	Q4V1K8_BACCZ	Hypothetical protein	3.4	Q5D8G9_SCHJA	SJCHGC08115 protein	3.4	O96242_PLAF7	Hypothetical protein PFB0745w	5.8			F
CD154577																		F
>CL1349	Q5DGF2_SCHJA	SJCHGC05224 protein	8.00E-48	Q86JP4_DICDI	Hypothetical protein	0.95	Q55AB2_DICDI	Hypothetical protein	0.95	Q54E54_DICDI	Hypothetical protein	2.8	Q6CMT2_KLULA	Kluyveromyces lactis strain NRRL Y-1140 chromosome E of strain NRRL Y-1140 of K	6.2			F
CD192317	Q9KLD9_VIBCH	ABC transporter, periplasmic substrate-binding protein	7.5	Q6LFG7_PLAF7	Hypothetical protein	7.5	Q7UX25_RHOBA	Putative esterase	9.8									F
CD169645	Q8I3G3_PLAF7	Hypothetical protein PFE1525w	7.4															F
CD088642	Q9G910_OCHDN	DNA polymerase (EC 2.7.7.7)	1.2	Q891V3_CLOTE	Hypothetical sugar-binding protein	5.8	Q8ZS78_ANASP	Alr7634 protein	7.5									F
Contig5138		UNKNOWN 2995	OM0023356-AOP															F
AA566200																		F
SMLA45H10	Q8T5G5_SCHJA	Polyprotein	4.00E-37	Q8MWP9_SCHJA	Polyprotein (Fragment)	4.00E-37	Q5DBA5_SCHJA	SJCHGC09144 protein	8.00E-36	Q5BSC9_SCHJA	SJCHGC05010 protein (Fragment)	3.00E-26	Q5BSF5_SCHJA	SJCHGC04561 protein (Fragment)	4.00E-13			F
CD068213	Q5BSV8_SCHJA	SJCHGC03153 protein	8.00E-06	Q4QQE8_SCHMA	Endonuclease-reverse transcriptase	0.002	Q512U7_ENTHI	Hypothetical protein	5	Q6BJ94_DEBHA	Similar to tr|Q9P865 Candida albicans She9 protein	5	Q9U8B4_PLAFA	Merozoite surface protein 5	6.5			F
>CL230	Q5BVX5_SCHJA	SJCHGC00611 protein (Fragment)	2.00E-10	Q5BVX3_SCHJA	Hypothetical protein	2.00E-10	Q6LF85_PLAF7	Hypothetical protein	2.00E-04	Q7RNM2_PLAYO	Putative peptidyl prolyl cis-trans isomerase with RNA binding region	0.021	Q8IBA8_PLAF7	Hypothetical protein MAL8P1.18	0.047			F
CONTIG4105	Q4Y508_PLACH	Hypothetical protein (Fragment)	0.036	Q4QBH7_LEIMA	Hypothetical protein	0.047	Q62097_MOUSE	Mus musculus ORFs (putative primordial protein), complete cds	0.14	Q4Z234_PLABE	Hypothetical protein	0.89	Q7RJP2_PLAYO	Hypothetical protein	0.89			F
>CL1234	Q5BSL7_SCHJA	SJCHGC03827 protein	3.00E-10	HMW2_MYCPN	Cytadherence high molecular weight protein 2 (Cytadherence accessory protein 2)	1.6	Q6DDJ8_XENLA	MGC83526 protein	2.1	Q8ILA0_PLAF7	Hypothetical protein	2.1	Q4JHF9_XENLA	Ecotropic viral integration site 1	2.8			F
CD083344																		F
Contig5279		UNKNOWN 3108	OM0023366-AOP	hypothetical	hypothetical													F
CONTIG12144	Q5DBS6_SCHJA	SJCHGC04223 protein	e-118	Q8VBX5_MOUSE	Palmitoyl-protein thioesterase	4.00E-59	Q3U6J9_MOUSE	Bone marrow macrophage cDNA, RIKEN full-length enriched library, clone:I830123D	4.00E-59	Q3TEL0_MOUSE	2 days neonate thymus thymic cells cDNA, RIKEN full-length enriched library, cl	4.00E-59	PPT1_MOUSE	Palmitoyl-protein thioesterase 1 precursor (EC 3.1.2.22) (Palmitoyl-protein hyd	4.00E-59			F
CONTIG12757	Q3C9Q0_9CLOT	Hypothetical protein	0.91															F
CONTIG12102	Q55EC9_DICDI	Hypothetical protein	3.4	Q5E454_VIBF1	Latent nuclear antigen	4.4	Q9RQS8_MYCML	Putative lipoprotein (Fragment)	4.4	Q4YZI9_PLABE	Hypothetical protein (Fragment)	5.7	Q8ILX3_PLAF7	Hypothetical protein	5.7			F
CONTIG1185	Q4QQE8_SCHMA	Endonuclease-reverse transcriptase	2.00E-64	Q5C264_SCHJA	SJCHGC06886 protein (Fragment)	6.00E-31	Q5C0M3_SCHJA	SJCHGC02939 protein (Fragment)	4.00E-28	Q5BST9_SCHJA	SJCHGC03271 protein (Fragment)	6.00E-11	Q5TRM3_ANOGA	ENSANGP00000027774 (Fragment)	1.00E-07			F
CD146835	Q5C2T7_SCHJA	SJCHGC08721 protein (Fragment)	3.00E-14	Q4SRS6_TETNG	Chromosome undetermined SCAF14494, whole genome shotgun sequence. (Fragment)	7.00E-04	Q5SQL9_MOUSE	Spectrin beta 2	7.00E-04	Q5SQL8_MOUSE	Spectrin beta 2	7.00E-04	Q3TTX2_MOUSE	10 days neonate skin cDNA, RIKEN full-length enriched library, clone:4732446P20	7.00E-04			F
>CL150	Q5DEW4_SCHJA	Hypothetical protein	2.00E-24	Q5C035_SCHJA	SJCHGC00199 protein (Fragment)	1.00E-23	Q5BZY8_SCHJA	Hypothetical protein	2.00E-17	Q5BZU4_SCHJA	Hypothetical protein	2.00E-17	Q5C044_SCHJA	Hypothetical protein	7.00E-17			F
SMLA32E04	Q5ZTD5_LEGPH	Acetyl CoA carboxylase alpha subunit	3.7	Q5X358_LEGPA	Hypothetical protein	3.7	Q5WUL6_LEGPL	Hypothetical protein	3.7									F
CONTIG12769	Q62098_MOUSE	Mus musculus ORFs (putative primordial protein), complete cds	0.2	Q61WV6_CAEBR	Hypothetical protein CBG04238	1.7	Q62097_MOUSE	Mus musculus ORFs (putative primordial protein), complete cds	2.9	Q4YYL6_PLABE	Hypothetical protein	2.9	Q8I3V3_PLAF7	Hypothetical protein PFE0775c	3.7			F
SMLC3G09	Q38F17_9TRYP	Hypothetical protein	7.8															F
CD190148	Q96VP8_GLOIN	Putative fatty acid CoA ligase (Fragment)	5.7															F
CD187438	Q9VBJ2_DROME	CG8318-PB, isoform B	0.001	Q8IMS2_DROME	CG8318-PC, isoform C	0.001	Q59DT9_DROME	CG8318-PD, isoform D	0.001	O01399_DROME	Neurofibromin	0.001	O01398_DROME	Neurofibromin	0.001			F
CD158756																		F
CONTIG5587	P43_XENBO	P43 5S RNA binding protein (42S P43) (Thesaurin B)	4.5	Q4Z1W2_PLABE	Hypothetical protein	5.9												F
CD092779	Q336K9_CAEEL	Hypothetical protein	5.8	Q8TCP4_HUMAN	Hypothetical protein DKFZp761N1114 (Fragment)	7.6	Q8NAY0_HUMAN	Hypothetical protein FLJ34577	7.6	Q8N468_HUMAN	Hypothetical protein DKFZp761N1114	7.6	Q6UY25_HUMAN	ALIN3064	7.6			F
CD163155	Q5D8U5_SCHJA	SJCHGC06571 protein	0.004															F
CONTIG4129	Q4E0S9_TRYCR	Hypothetical protein	5.8	Q4DG16_TRYCR	Hypothetical protein	5.8	O96057_HALRO	Ascidian calcium channel alpha1-subunit	5.8	Q3HJ15_TRIER	Similar to kinase	9.9						F
>CL725																		F
CONTIG5784	Q4QQE3_SCHMA	Hypothetical protein	1.00E-14	Q4QQE5_SCHMA	Hypothetical protein	0.021												F
CD065353	Q5DG21_SCHJA	SJCHGC01271 protein	1.00E-07	Q5DBV4_SCHJA	Hypothetical protein	4.00E-07												F
CD069790	Q465B8_METBA	Hypothetical protein	3.6	Q6F2Q8_ORYSA	Hypothetical protein OSJNBa0060G17.21	8	Q4Z4G0_PLABE	Hypothetical protein	8									F
CD196917	Q6G5Q7_BARHE	OpgC protein	0.082	Q8HN54_BRUMA	NADH dehydrogenase subunit 4	0.18	Q70US6_DIRIM	NADH dehydrogenase subunit 4	0.24	O63545_9EUGL	NADH dehydrogenase subunit 5 (Fragment)	0.24	Q5HJL1_STAAC	Capsular polysaccharide biosynthesis protein Cap5K	0.53			F
CONTIG4517	Q4QQE8_SCHMA	Endonuclease-reverse transcriptase	5.00E-18	Q5BQT0_SCHJA	SJCHGC09821 protein	2.00E-05	Q5BQS2_SCHJA	SJCHGC09829 protein	8.00E-05	Q5BSV8_SCHJA	SJCHGC03153 protein	8.00E-04	Q5DGI4_SCHJA	SJCHGC03084 protein	0.007			F
Contig3297		UNKNOWN 1998	OM0023396-AOP															F
CD147749	O99992_PORPU	SecY-independent transporter protein	5.8	Q4MYA2_THEPA	Hypothetical protein	9.9												F
CD133415																		F
CD078114	Q95ZS4_CAEEL	Hypothetical protein	0.002	Q20977_CAEEL	Hypothetical protein	0.002	Q9U9L4_CAEEL	Zinc finger protein STAT-B	0.002	Q4S3D3_TETNG	Chromosome 1 SCAF14751, whole genome shotgun sequence	0.007	Q68FA7_XENTR	MGC79586 protein	0.01			F
CD187389	Q6NRQ4_XENLA	LOC431977 protein (Fragment)	0.18	Q8CET8_MOUSE	14 days embryo liver cDNA, RIKEN full-length enriched library, clone:4432409D24	0.18	Q8BS84_MOUSE	12 days embryo embryonic body between diaphragm region and neck cDNA, RIKEN full	0.18	Q69ZG5_MOUSE	MKIAA1557 protein (Fragment)	0.18	Q8R2U9_MOUSE	Arid2 protein	0.18			F
CD132919	DIHR_MANSE	Diuretic hormone receptor (DH-R)	0.37	Q75JK2_DICDI	Hypothetical protein	2.4	Q55BH2_DICDI	Hypothetical protein	4.1									F
>CL1352	Q5DBY6_SCHJA	SJCHGC01085 protein	3.00E-38	Q5ZJV3_CHICK	Hypothetical protein	2.00E-27	Q5NTY0_MOUSE	DnaJ (Hsp40) homolog, subfamily A, member 1 (Blastocyst blastocyst cDNA, RIKEN f	8.00E-27	Q3TK61_MOUSE	Blastocyst blastocyst cDNA, RIKEN full-length enriched library, clone:I1C0033M16	8.00E-27	Q76G10_CRIGR	DnaJ (Hsp40) homolog, subfamily A, member 1 (Fragment)	8.00E-27			F
SMLC18F02A																		F
CD125752																		F
CD061464	Q9Y2N9_HUMAN	BC37295_1	3.00E-11	Q6ECI4_HUMAN	Zinc finger protein 470	3.00E-11	Q6ZPA1_HUMAN	Hypothetical protein FLJ26175	3.00E-11	Q497V9_MOUSE	LOC244556 protein	4.00E-11	ZBT16_HUMAN	Zinc finger and BTB domain-containing protein 16 (Zinc finger protein PLZF) (Pro	6.00E-11			F
>CL752	Q4SAY8_TETNG	Chromosome undetermined SCAF14678, whole genome shotgun sequence. (Fragment)	0.08	Q59M77_CANAL	Hypothetical protein	3.4	Q4P8X9_USTMA	Hypothetical protein	4.4	Q4FWR3_LEIMA	Hypothetical protein	5.7	Q9NHC4_TETTH	Programmed DNA degradation protein 3	7.5			F
CONTIG7601	Q5DEL0_SCHJA	SJCHGC02418 protein	4.00E-36	Q3V0P4_MOUSE	Adult male testis cDNA, RIKEN full-length enriched library, clone:4930546O19 pro	2.00E-22	Q6PIY5_HUMAN	Hypothetical protein MGC33556	5.00E-22	Q387J5_9TRYP	Hypothetical protein	0.3	Q4Y4R2_PLACH	ATP-dependent Clp protease, putative (Fragment)	3.4			F
CONTIG13111	Q5C3H5_SCHJA	SJCHGC02149 protein (Fragment)	1.00E-19	O18465_HIRME	Tractin	0.63	Q5C6Q1_SCHJA	SJCHGC01964 protein (Fragment)	1.8	Q9QVN4_9MURI	R NR-CaM 22 protein	2.4	Q9QVN3_9MURI	R NR-CaM 12 protein	2.4			F
CD158221	Q7RN79_PLAYO	Hypothetical protein	4.5															F
CONTIG10161	Q54RX2_DICDI	Hypothetical protein	0.006	Q55DM1_DICDI	BEACH domain protein	0.013	Q9U573_DICDI	Beige protein homolog	0.013	Q54I44_DICDI	Hypothetical protein	0.016	Q54XC3_DICDI	Hypothetical protein	0.028			F
>CL1177	Q4QQE8_SCHMA	Endonuclease-reverse transcriptase	4.00E-22	Q5BSV8_SCHJA	SJCHGC03153 protein	5.00E-05	Q4WXB3_ASPFU	Hypothetical protein	2.3	Q6BYE9_DEBHA	Debaryomyces hansenii chromosome A of strain CBS767 of Debaryomyces hansenii	6.7	AANT_HDVD3	Large delta antigen (p27) (HDAg-L) [Contains: Small delta antigen (p24) (HDAg-S)	8.8			F
>CL788																		F
AI067162	Q5BIH5_DROME	RE60631p	2.6	Q9VEV4_DROME	CG12753-PA	2.6	Q7QCS1_ANOGA	ENSANGP00000022085 (Fragment)	4.4	Q8IB32_PLAF7	Hypothetical protein MAL8P1.61	9.9						F
Contig6944		UNKNOWN 4354	OM0023380-AOP															F
CD130464																		F
CONTIG8476	Q4Z5J3_PLABE	Hypothetical protein (Fragment)	1.1	Q7RNY2_PLAYO	Hypothetical protein	1.1	Q4A5Z1_MYCS5	Hypothetical protein	2.4									F
Contig4257		SIMILAR TO HYPOTHETICAL PROTEIN FLJ12571 (2E-67) POSSIBLE ANTISENSE	OM0023400-AOP															F
CONTIG1447	Q7S2S7_NEUCR	Hypothetical protein	2.5															F
CD194478	Q4BV07_CROWT	Transposase, IS4	5.7	Q4C302_CROWT	Hypothetical protein	7.5	Q6G0W3_BARQU	Thiol 3A-disulfide interchange protein	9.8	Q8F5F6_LEPIN	Predicted HD family protein	9.8	Q72QN5_LEPIC	Hypothetical protein	9.8			F
CD154976	Q36VR9_RHOPA	Cyclopropane-fatty-acyl-phospholipid synthase (EC 2.1.1.79)	1.1	Q37FL6_RHOPA	Cyclopropane-fatty-acyl-phospholipid synthase (EC 2.1.1.79)	1.5	Q35F31_9BRAD	Cyclopropane-fatty-acyl-phospholipid synthase (EC 2.1.1.79)	1.5	Q34M61_RHOPA	Cyclopropane-fatty-acyl-phospholipid synthase (EC 2.1.1.79)	1.5	Q6N6P5_RHOPA	Cyclopropane-fatty-acyl-phospholipid synthase (EC 2.1.1.79)	2.5			F
CD068576	Q55A92_DICDI	Hypothetical protein	7.6	Q86JN0_DICDI	Hypothetical protein	7.6												F
CONTIG7984	Q8ID65_PLAF7	Hypothetical protein PF13_0339	0.005	Q4IAM2_GIBZE	Hypothetical protein	0.13	Q5APQ2_CANAL	Hypothetical protein	0.49	Q5AP56_CANAL	Hypothetical protein	1.9	Q6FTA2_CANGA	Similar to sp|P20840 Saccharomyces cerevisiae YJR004c SAG1 alpha-agglutinin	3.2			F
SMLA57E02	Q5GR12_9CHON	Keratin 10	9.8															F
CONTIG8705	Q4YFP1_PLABE	Hypothetical protein (Fragment)	0.02	Q8N8E0_HUMAN	Hypothetical protein FLJ39621	0.026	Q6ZSA2_HUMAN	Hypothetical protein FLJ45698	0.026	Q4VBJ0_BRARE	Integrin, beta-like 1	0.034	Q8BQ60_MOUSE	12 days embryo spinal ganglion cDNA, RIKEN full-length enriched library, clone:D	0.044			F
SMAA25592																		F
CD064837	Q65652_9VIRU	Blueberry scorch carlavirus mRNA	4.4	Q46JT8_PROMT	Cysteinyl-tRNA synthetase, class Ia (EC 6.1.1.16)	9.8												F
CD128997	Q92AS8_LISIN	Lin1841 protein	10	Q8Y6F7_LISMO	Lmo1730 protein	10	Q71YT8_LISMF	ABC transporter, substrate-binding protein	10	Q4ET28_LISMO	ABC transporter, substrate-binding protein	10	Q4EI77_LISMO	ABC transporter, substrate-binding protein	10			F
CONTIG4644	Q5DHA9_SCHJA	SJCHGC04876 protein	4.00E-54	Q6NRE6_XENLA	Myb1 protein	0.003	Q8SWS2_DROME	RE29468p (CG15926-PA)	0.077	MYBB_XENLA	Myb-related protein B (B-Myb) (Myb-related protein 1) (XMYB1)	0.077	Q5TUU9_ANOGA	ENSANGP00000026299 (Fragment)	0.29			F
CD087989	SEY1_CANAL	Protein SEY1	1.5	Q54S71_DICDI	Hypothetical protein	2.6	Q97II4_CLOAB	Uncharacterized conserved protein, yisX B.subtilis ortholog	7.5									F
CD092877	Q4QQE8_SCHMA	Endonuclease-reverse transcriptase	2.00E-04															F
CD192710																		F
>CL1318	Q4RJN4_TETNG	Chromosome 10 SCAF15036, whole genome shotgun sequence. (Fragment)	1	Q4Z2P8_PLABE	Pb-reticulocyte binding protein (Fragment)	1.3	Q6DC64_BRARE	Zgc:100981	1.7	Q54XM2_DICDI	Hypothetical protein	1.7	Q552Y3_DICDI	Hypothetical protein	3.9			F
CD158876																		F
CONTIG7383	Q4QQE8_SCHMA	Endonuclease-reverse transcriptase	4.00E-13	Q5DEY9_SCHJA	SJCHGC02887 protein	1.00E-09	Q5BRY6_SCHJA	SJCHGC07009 protein (Fragment)	3.00E-08	Q30KW9_SCHMA	Reverse transcriptase SR3-right (Fragment)	0.014	Q30KX0_SCHMA	Reverse transcriptase SR3-left (Fragment)	0.032			F
SMLC20D09A																		F
CD094347	Q9E784_BEFV	Protein L	2.2	Q7NKE5_GLOVI	Two-component hybrid sensor and regulator	6.3												F
CD087058	AFT1_YEAST	Iron-regulated transcriptional repressor AFT1	4.4	Q5WEU5_BACSK	Asparagine synthetase, glutamine-hydrolyzing (EC 6.3.5.4)	5.8	Q7QRD0_GIALA	GLP_503_22898_18957	5.8	Q06993_YEAST	RCS1 protein	5.8						F
>CL123	Q8T5G5_SCHJA	Polyprotein	7.00E-42	Q8MWP9_SCHJA	Polyprotein (Fragment)	7.00E-42	Q5C3A3_SCHJA	SJCHGC09318 protein (Fragment)	3.00E-40	Q5C394_SCHJA	SJCHGC09145 protein (Fragment)	5.00E-34	Q5C3A7_SCHJA	SJCHGC06937 protein (Fragment)	4.00E-23			F
CONTIG9021	Q6CTW9_KLULA	Similar to sgd|S0005790 Saccharomyces cerevisiae YOR264w hypothetical protein	0.18	OSTP_SHEEP	Osteopontin precursor (Bone sialoprotein-1) (Secreted phosphoprotein 1) (SPP-1)	0.18	OSTP_BOVIN	Osteopontin precursor (Bone sialoprotein-1) (Secreted phosphoprotein 1) (SPP-1)	0.23	O96968_BOMMO	Yokozuna protein	0.31	Q56NM9_BOVIN	Osteopontin (Secreted phosphoprotein 1)	0.4			F
CD165771																		F
CD201986	Q4QQE8_SCHMA	Endonuclease-reverse transcriptase	1.00E-11	Q5BSB5_SCHJA	SJCHGC05180 protein	7.00E-04	Q5BT15_SCHJA	SJCHGC02990 protein	0.002	Q5DFU9_SCHJA	SJCHGC02281 protein	0.01	Q5C5W5_SCHJA	SJCHGC02282 protein (Fragment)	0.01			F
CONTIG12565	Q5C5G0_SCHJA	SJCHGC03730 protein (Fragment)	0.016	Q4Y000_PLACH	Hypothetical protein	0.88	Q4YR66_PLABE	Hypothetical protein (Fragment)	1.1	Q4YIK2_PLABE	Hypothetical protein	1.1	Q7RIP3_PLAYO	Hypothetical protein	1.1			F
CD125718																		F
CD117339	Q8MMK3_DUGJA	DjGluR1	6.00E-12	Q61CE6_CAEBR	Hypothetical protein CBG12954	1.00E-09	Q17697_CAEEL	Glutamate receptor family (Ampa) protein 4	2.00E-09	Q9BK22_CAEEL	Ionotropic glutamate receptor GLR-4 (Fragment)	6.00E-08	Q95VU2_HOMAM	Ionotropic glutamate receptor subunit	2.00E-07			F
CONTIG7443	Q32LW7_BRARE	Hypothetical protein	1.4	Q5RID2_BRARE	Novel protein similar to vertebrate potassium voltage-gated channel, delayed-rec	1.4	Q6ZR84_HUMAN	Hypothetical protein FLJ46559	5.4	Q5D8V6_SCHJA	SJCHGC01399 protein	7	Q8WPU3_9TRYP	Hypothetical protein 13J3.08	9.1			F
L25919d																		F
CD129585	Q4S7V2_TETNG	Chromosome 18 SCAF14712, whole genome shotgun sequence	0.53	Q4YUU5_PLABE	Hypothetical protein	0.69	Q4RLG7_TETNG	Chromosome undetermined SCAF15021, whole genome shotgun sequence. (Fragment)	0.9	Q4D9R2_TRYCR	Tubulin-tyrosine ligase, putative	2	Q4DYL2_TRYCR	RNA-binding protein, putative	2.6			F
SMLA59A01	Q4SN41_TETNG	Chromosome 6 SCAF14544, whole genome shotgun sequence. (Fragment)	8.00E-23	Q7QEM2_ANOGA	ENSANGP00000017381	1.00E-21	ZFH2_DROME	Zinc finger protein 2 (Zinc finger homeodomain protein 2)	1.00E-21	Q86UP3_HUMAN	Zinc finger homeodomain 4 protein	2.00E-21	Q6ZN20_HUMAN	Hypothetical protein FLJ16514	2.00E-21			F
CD179002																		F
Contig2364		UNKNOWN 1216	OM0023341-AOP															F
CONTIG12858	O76213_SCHMA	Reverse transcriptase (Fragment)	3.00E-08															F
CD096359																		F
Contig2885		SIMILAR TO MAK16-LIKE PROTEIN (1E-36)	OM0023397-AOP															F
CD069572																		F
CD131086																		F
>CL58	Q8CJ77_RAT	Ligand-independent activating molecule for estrogen receptor (Fragment)	3.9	Q3S407_CALVI	Stripe-b-like protein	5.1	Q4ZFU2_LOXAR	Sphingomyelinase D-like protein 2 (Fragment)	5.1	SMAD_LOXAR	Sphingomyelinase D precursor (EC 3.1.4.41) (SMase D) (Dermonecrotic enzyme)	5.1	Q6ZRM1_HUMAN	Hypothetical protein FLJ46255	8.8			F
CD165407	Q4FP14_PELUB	50S ribosomal protein L19	0.31	Q3V9D4_9SPHN	Ribosomal protein L19	0.91	Q4TNP2_9SPHN	Ribosomal protein L19	2	Q3PKI2_PARDE	Ribosomal protein L19	2	RL19_SILPO	50S ribosomal protein L19	2			F
SMLC34G02	Q9VYK0_DROME	CG4013-PA, isoform A (Cg4013-pb, isoform b)	0.007	Q28687_RABIT	Neurofilament-H (Fragment)	0.009	AP3D1_HUMAN	Adapter-related protein complex 3 delta 1 subunit (Delta-adaptin 3) (AP-3 compl	0.009	Q28688_RABIT	Neurofilament-H (Fragment)	0.015	Q9U4I2_DROME	SANT domain protein SMRTER	0.058			F
CONTIG10810	Q5BSA3_SCHJA	SJCHGC05284 protein	1.00E-15	Q8T5G5_SCHJA	Polyprotein	4.00E-15	Q8MWP9_SCHJA	Polyprotein (Fragment)	4.00E-15	Q3MJT3_SCHJA	SJCHGC05140 protein	1.00E-14	Q5BT13_SCHJA	SJCHGC03000 protein (Fragment)	1.00E-14			F
CD198269	Q41G35_9BACI	K+ channel, pore region	2.6	Q5MQC5_9CORO	Nucleocapsid phosphoprotein 2	5.8	Q4N3Q0_THEPA	Hypothetical protein	5.8	Q8IE32_PLAF7	Hypothetical protein MAL13P1.155	7.5	Q4YCP0_PLABE	Hypothetical protein (Fragment)	9.8			F
CD165978	Q4S7Z6_TETNG	Chromosome 9 SCAF14710, whole genome shotgun sequence. (Fragment)	0.013	FA38A_HUMAN	Protein FAM38A	0.017	Q4S220_TETNG	Chromosome undetermined SCAF14764, whole genome shotgun sequence. (Fragment)	0.037	Q4T7Y0_TETNG	Chromosome undetermined SCAF7949, whole genome shotgun sequence. (Fragment)	0.063	Q4RWW2_TETNG	Chromosome 15 SCAF14981, whole genome shotgun sequence. (Fragment)	0.11			F
CD195818	Q9CFA4_LACLA	Hypothetical protein yqbI	2.6															F
CONTIG11144	Q3RNV2_9BURK	Hypothetical protein	2.00E-82	Q8CME1_VIBVU	Cell wall-associated hydrolase	3.00E-54	Q3EFQ1_ACTSC	Cell wall-associated hydrolase	2.00E-53	Q68XF8_RICTY	Hypothetical protein	4.00E-42	Q4HIX7_CAMLA	Cell wall-associated hydrolase, putative	4.00E-42			F
CD154600																		F
CONTIG9225	Q4QQE8_SCHMA	Endonuclease-reverse transcriptase	2.00E-34	Q5C0M3_SCHJA	SJCHGC02939 protein (Fragment)	4.00E-11	Q5BRY6_SCHJA	SJCHGC07009 protein (Fragment)	2.00E-07	Q5DEY9_SCHJA	SJCHGC02887 protein	2.00E-06	Q9ZK29_HELPJ	Putative	0.009			F
CD133865																		F
CD164049																		F
Contig4279		UNKNOWN 2711	OM0023400-AOP	hypothetical	hypothetical													F
CD130615																		F
CONTIG7719	ANC1_HUMAN	Anaphase promoting complex subunit 1 (APC1) (Cyclosome subunit 1) (Protein Tsg2	1.00E-06	ANC1_MOUSE	Anaphase promoting complex subunit 1 (APC1) (Cyclosome subunit 1) (Protein Tsg2	9.00E-05	Q7PS20_ANOGA	ENSANGP00000007497 (Fragment)	3.00E-04	Q4SQN4_TETNG	Chromosome 17 SCAF14532, whole genome shotgun sequence	0.001	Q8R868_THETN	Na+/H+ antiporter	0.2			F
CONTIG1461	Q5R6S3_PONPY	Hypothetical protein DKFZp459B111	2.00E-07	Q4R4K9_MACFA	Brain cDNA, clone: QnpA-14765, similar to human HSPC056 protein (HSPC056),	2.00E-07	Q4R477_MACFA	Testis cDNA clone: QtsA-11841, similar to human HSPC056 protein (HSPC056),	2.00E-07	Q8IUR7_HUMAN	Armadillo repeat containing 8	2.00E-07	Q6PIL2_HUMAN	Armadillo repeat containing 8	2.00E-07			F
CD064574	Q4QQE8_SCHMA	Endonuclease-reverse transcriptase	1.00E-26	Q5BT30_SCHJA	SJCHGC02932 protein (Fragment)	2.00E-09	Q5BQT0_SCHJA	SJCHGC09821 protein	2.00E-07	Q5BSE4_SCHJA	SJCHGC04778 protein (Fragment)	2.00E-06	Q5BT64_SCHJA	SJCHGC02633 protein (Fragment)	5.00E-04			F
SMLC39G04	Q7REV3_PLAYO	Drosophila melanogaster CG8797 gene product-related (Fragment)	0.007	Q3E6V7_ARATH	Protein At3g16460	0.044	O04310_ARATH	Jasmonate inducible protein isolog (Putative lectin protein) (Jasmonate inducibl	0.044	Q9K3K0_STRCO	Putative serine/threonine protein kinase	0.099	Q7YZ74_PLACH	Pc10118w	0.13			F
SMLC21C11																		F
CONTIG9564	Q614A0_CAEBR	Hypothetical protein CBG16118	8.00E-28	Q3S1K5_CAEEL	Hypothetical protein gap-2	1.00E-27	GAP2_CAEEL	Ras GTPase-activating protein gap-2 (GTPase-activating protein 2)	1.00E-27	GAP2_DROME	Probable Ras GTPase-activating protein	1.00E-20	Q4S2B0_TETNG	Chromosome undetermined SCAF14764, whole genome shotgun sequence. (Fragment)	1.00E-18			F
CD084743	Q5NNB2_ZYMMO	Outer membrane protein	5.1	Q9X3V8_ZYMMO	Hypothetical protein	5.1	Q65IN6_BACLD	YndG (Hypothetical protein)	6.6	Q7RTB8_PLAYO	Cysteine repeat modular protein 3 PbCRM3	6.6	Q6BXI2_DEBHA	Similar to CA2710|IPF7403 Candida albicans IPF7403 unknown function	6.6			F
CD094930	Q30KX0_SCHMA	Reverse transcriptase SR3-left (Fragment)	2.00E-10	Q30KW9_SCHMA	Reverse transcriptase SR3-right (Fragment)	2.00E-10	Q4QQE8_SCHMA	Endonuclease-reverse transcriptase	4.00E-08	O16589_CAEEL	Hypothetical protein F21E9.5	0.89						F
CONTIG3788	Q5DCR7_SCHJA	SJCHGC03163 protein	2	Q5BT64_SCHJA	SJCHGC02633 protein (Fragment)	5.8	Q5KVA6_GEOKA	Transcriptional regulator involved in mercury resistance operon	7.6									F
CD064012																		F
CONTIG8260																		F
SMLA36E12	YM8B_YEAST	Hypothetical 163.6 kDa protein in PET111-TIF11 intergenic region	4.1	Q8MQU8_AEDAE	Toll-related protein	5.4	Q7RMB0_PLAYO	Hypothetical protein (Fragment)	9.2	Q56RA0_DROMI	Toll protein (Fragment)	9.2	Q56R98_DROPS	Toll protein (Fragment)	9.2			F
SMAA69315																		F
CONTIG4218																		F
CD111549	YR311_MIMIV	Hypothetical RING finger protein R311	3.4	Q07707_STAAU	TrsA protein (TraA)	5.9	Q7RGG5_PLAYO	DnaJ domain, putative (Fragment)	7.6	Q8IFN8_PLAF7	Hypothetical protein PFD1045w	7.6						F
CONTIG12344	Q5C7M1_SCHJA	SJCHGC03603 protein (Fragment)	8.00E-83	Q61XQ9_CAEBR	Hypothetical protein CBG03881 (Fragment)	7.00E-04	Q54EA0_DICDI	Hypothetical protein	0.003	Q55FI2_DICDI	Hypothetical protein	0.018	Q95XR2_CAEEL	Hypothetical protein	0.031			F
CD063483	Q4KTG0_SUBDO	L24-like	2.00E-20	Q5RF04_PONPY	Hypothetical protein DKFZp469K1632	1.00E-19	Q5EBK7_MOUSE	BC003885 protein (ES cells cDNA, RIKEN full-length enriched library, clone:24101	2.00E-19	Q3U5N8_MOUSE	Bone marrow macrophage cDNA, RIKEN full-length enriched library, clone:I830167A2	2.00E-19	Q3SZ12_BOVIN	Hypothetical protein	2.00E-19			F
CONTIG11505	Q7S7I0_NEUCR	Hypothetical protein	0.67	Q871H8_NEUCR	Related to SH3-domain protein Cyk3	0.67	Q5DKY3_9HEMI	NADH dehydrogenase subunit 1	0.87	Q39I61_9BURK	GCN5-related N-acetyltransferase	7.4	Q4BD78_BURVI	GCN5-related N-acetyltransferase	7.4			F
Contig6617		UNKNOWN 4080	OM0023344-AOP															F
CONTIG2025	Q60UR4_CAEBR	Hypothetical protein CBG19860	5.00E-20	Q8I7L5_CAEEL	Hypothetical protein C31H1.6	1.00E-19	Q18341_CAEEL	Hypothetical protein C31H1.6	1.00E-19	Q61SC3_CAEBR	Hypothetical protein CBG06236	1.00E-18	Q17410_CAEEL	Hypothetical protein	8.00E-18			F
CONTIG3645	Q4N569_THEPA	Hypothetical protein	4.6	Q3VQH3_9CHLB	Hypothetical protein	5.9												F
CONTIG2057	Q4QQE9_SCHMA	Endonuclease-reverse transcriptase	3.00E-59	Q4QQE2_SCHMA	Endonuclease-reverse transcriptase	5.00E-31	Q4QQE4_SCHMA	Endonuclease-reverse transcriptase	2.00E-29	O18520_SCHMA	Pol (Fragment)	7.00E-14	Q6S5B0_CHICK	DNA-dependent protein kinase catalytic subunit (Fragment)	4.00E-11			F
CD166467	Q3MFH4_ANAVA	Putative diguanylate cyclase (GGDEF domain) with PAS/PAC and Chase2 sensors	3.4	Q8YXJ4_ANASP	All1219 protein	5.8	Q6MF41_PARUW	Hypothetical protein	9.9									F
CD180442	Q5BSA3_SCHJA	SJCHGC05284 protein	0.18	Q8T5G5_SCHJA	Polyprotein	0.24	Q8MWP9_SCHJA	Polyprotein (Fragment)	0.24	Q8MWP8_SCHJA	Polyprotein (Fragment)	0.24	Q5BSA9_SCHJA	SJCHGC05208 protein	0.31			F
CD178245																		F
CD118282	Q6IFU3_SCHMA	Pol polyprotein (Fragment)	0.002	Q68NI0_SCHMA	Polyprotein (Fragment)	0.009												F
Contig4272		SIMILAR TO UBIQUITIN HYDROLYZING ENZYME 1 (DEUBIQUITINATING ENZYME UBH1) 5E-19	OM0023400-AOP															F
CONTIG5656	Q8IIJ2_PLAF7	Tyrosine--tRNA ligase, putative	0.14	Q8IM60_PLAF7	Hypothetical protein	0.31	Q54RG2_DICDI	Hypothetical protein	0.41	Q9PJ13_CAMJE	Putative periplasmic protein	0.53	Q7UZK3_PROMP	Possible amidase enhancer precursor	0.53			F
CONTIG6229																		F
CD088634	Q8CC74_MOUSE	Adult male epididymis cDNA, RIKEN full-length enriched library, clone:9230104O11	6															F
CD171573																		F
CD126063	Q8XN60_CLOPE	Capsular polysaccharide biosynthesis protein	1.5	Q7QTY5_GIALA	GLP_169_22321_32229	2.6	Q5DE37_SCHJA	SJCHGC06908 protein	4.4	Y1496_PYRFU	Hypothetical UPF0252 protein PF1496	7.5	Q7RKK3_PLAYO	DNA-directed RNA polymerase iii largest subunit	9.8			F
CD186797																		F
CONTIG11098	Q8T5G5_SCHJA	Polyprotein	2.00E-38	Q8MWP9_SCHJA	Polyprotein (Fragment)	2.00E-38	Q5C3A3_SCHJA	SJCHGC09318 protein (Fragment)	5.00E-36	Q5C3A7_SCHJA	SJCHGC06937 protein (Fragment)	4.00E-24	Q5C394_SCHJA	SJCHGC09145 protein (Fragment)	7.00E-24			F
CD187536	Q759E7_ASHGO	ADR330Wp	7.6	O96192_PLAF7	Hypothetical protein PFB0495w	10												F
Contig1340		UNKNOWN 656 POSSIBLE ANTISENSE	OM0023353-AOP	hypothetical	hypothetical													F
CD189194	Q74K57_LACJO	Hypothetical protein	7.7															F
CONTIG8083	Q4Z6T6_PLABE	Mitochondrial carrier protein, putative	4															F
CONTIG4439																		F
>CL1438	Q8IB83_PLAF7	Hypothetical protein PF08_0027	1.8															F
CF497379	Q5C3A3_SCHJA	SJCHGC09318 protein (Fragment)	2.00E-21	Q8T5G5_SCHJA	Polyprotein	5.00E-20	Q8MWP9_SCHJA	Polyprotein (Fragment)	5.00E-20	Q3KZB4_SCHJA	SJCHGC02980 protein (Fragment)	0.081	Q76IP1_CIOIN	Reverse transcriptase	0.31			F
CD093551	Q2Y6P9_9PROT	Cytochrome c, class I	1.00E-15	Q7W3J7_BORPA	Cytochrome C	4.00E-15	Q63X41_BURPS	Putative periplasmic cytochrome c containing protein	5.00E-15	Q62MI8_BURMA	Cytochrome c family protein	5.00E-15	Q2Y8A4_9PROT	Cytochrome c, class I precursor	5.00E-15			F
CD097038	Q4QQE8_SCHMA	Endonuclease-reverse transcriptase	2.00E-16	Q5BT15_SCHJA	SJCHGC02990 protein	0.001	Q5DFU9_SCHJA	SJCHGC02281 protein	0.004	Q5BT19_SCHJA	SJCHGC02981 protein (Fragment)	0.016	Q5BSB5_SCHJA	SJCHGC05180 protein	0.5			F
SMHMGRED1		SCHISTOSOMA MANSONI HMG-COA REDUCTASE GENE, EXON 2	OM0023338-AOP															F
CONTIG7231																		F
CD157749																		F
CONTIG5574	Q8IC30_PLAF7	Hypothetical protein MAL7P1.16	2.6															F
CONTIG1524	Q38DD4_9TRYP	Hypothetical protein	6.1	Q8F3I1_LEPIN	Two-component response regulator	8	Q72S59_LEPIC	Histidine kinase response regulator hybrid protein	8									F
CD066793	Q953W8_9BILA	NADH-ubiquinone oxidoreductase chain 3 (EC 1.6.5.3) (NADH dehydrogenase subunit	7.5	Q5KG86_CRYNE	Sphingosine N-acyltransferase, putative	9.8	Q55RT3_CRYNE	Hypothetical protein	9.8									F
CD074977	Q5DC76_SCHJA	SJCHGC05755 protein	8.00E-11	Q5D9K6_SCHJA	SJCHGC02125 protein	7.00E-09	Q7RIY8_PLAYO	Hypoxanthine phosphoribosyltransferase, putative	5.00E-08	HPRT_SCHMA	Hypoxanthine-guanine phosphoribosyltransferase (EC 2.4.2.8) (HGPRT) (HGPRTase)	5.00E-08	Q8IJS1_PLAF7	Hypoxanthine phosphoribosyltransferase	2.00E-07			F
AI764906	Q8JLZ3_9NUCL	Putative DNA replication/transcription factor IE-1	4.5	Q6D2Z6_ERWCT	Nitrogenase iron-molybdenum cofactor biosynthesis protein	10												F
>CL407																		F
CONTIG5079																		F
SMLA22B05	Q8T5G5_SCHJA	Polyprotein	2.00E-37	Q8MWP9_SCHJA	Polyprotein (Fragment)	2.00E-37	Q5C394_SCHJA	SJCHGC09145 protein (Fragment)	6.00E-37	Q5C3A3_SCHJA	SJCHGC09318 protein (Fragment)	4.00E-29	Q5C3A7_SCHJA	SJCHGC06937 protein (Fragment)	1.00E-14			F
CONTIG3564	Q4QQE8_SCHMA	Endonuclease-reverse transcriptase	6.00E-12	Q5BSE4_SCHJA	SJCHGC04778 protein (Fragment)	5.00E-08	Q5BT64_SCHJA	SJCHGC02633 protein (Fragment)	6.00E-04	Q5D952_SCHJA	SJCHGC04954 protein	0.35	Q4QB87_LEIMA	Mitochondrial RNA binding protein, putative	2.9			F
CD069234	Q8GD24_BORAV	Outer membrane protein FimC	0.14	Q6FNF8_CANGA	Similar to sp|P36037 Saccharomyces cerevisiae YKL213c DOA1	0.24	Q60W26_CAEBR	Hypothetical protein CBG19297	0.7	Q4CTR3_TRYCR	Dispersed gene family protein 1 (DGF-1), putative (Fragment)	2	Q7XXC5_ORYSA	OSJNBa0027O01.13 protein (OSJNBb0006L01.3 protein)	2.7			F
CD153793	Q9LYY3_ARATH	Hypothetical protein F15A17_50	3.6	Q8GX75_ARATH	Hypothetical protein At5g03020/F15A17_50 (At5g03020)	3.6	Q6K5X8_ORYSA	Hypothetical protein OJ2055_H10.28 (Hypothetical protein P0407A09.7)	6.1									F
CONTIG13016	Q5C3X5_SCHJA	SJCHGC03769 protein (Fragment)	4.00E-45	Q964C7_HIRME	Hillarin	7.00E-26	Q7PPJ2_ANOGA	ENSANGP00000002507	7.00E-13	Q960G2_DROME	SD03168p	2.00E-12	Q8MLK6_DROME	CG30147-PA, isoform A (Cg30147-pb, isoform b)	2.00E-12			F
CD135138	Q4QQE8_SCHMA	Endonuclease-reverse transcriptase	2.00E-04	Q5BQS2_SCHJA	SJCHGC09829 protein	0.52	Q7RKD6_PLAYO	Hypothetical protein	2.6	Q4N0I8_THEPA	Hypothetical protein	2.6	O25380_HELPY	Hypothetical protein HP0669	7.5			F
CD120843																		F
CONTIG11000	Q4QQF8_SCHMA	Pol polyprotein	e-121	Q9BM80_CLOSI	Gag-pol polyprotein	2.00E-77	Q9BM79_CLOSI	Gag-pol polyprotein	2.00E-77	Q9BM81_CLOSI	Gag-pol polyprotein	1.00E-75	Q6IFT8_SCHMA	Pol polyprotein	5.00E-73			F
CD117660	Q73LI9_TREDE	Membrane protein, putative	0.28	Q8ILB9_PLAF7	Hypothetical protein	1.4	Q85TH3_9HYME	NADH dehydrogenase subunit 1	3.1	Q4YTD5_PLABE	CCAAT-box DNA binding protein subunit B, putative	4	Q7RRD5_PLAYO	CCAAT-box DNA binding protein subunit B	4			F
CD188659	NU5H_NYCOV	NADH-ubiquinone oxidoreductase chain 5 (EC 1.6.5.3) (NADH dehydrogenase subunit	9.9															F
CONTIG11078	Q4QQD9_SCHMA	Reverse transcriptase (Fragment)	3.00E-55	Q86EK6_SCHJA	Clone ZZD253 mRNA sequence	1.00E-15	Q8UUM3_ORYLA	ReO_6 protein	3.00E-14	Q5BYT4_SCHJA	SJCHGC08991 protein (Fragment)	6.00E-12	Q5TRD8_ANOGA	ENSANGP00000005847 (Fragment)	4.00E-11			F
CONTIG8883	Q5DTN7_MOUSE	MKIAA4093 protein (Fragment)	e-100	DYN1_RAT	Dynamin-1 (EC 3.6.5.5) (D100) (Dynamin, brain) (B-dynamin)	e-100	Q3UNM1_MOUSE	Colon RCB-0549 Cle-H3 cDNA, RIKEN full-length enriched library, clone:G430037A0	1.00E-98	Q6Q325_LYTVA	Dynamin	3.00E-98	Q8BZ98_MOUSE	16 days neonate cerebellum cDNA, RIKEN full-length enriched library, clone:9630	1.00E-97			F
CD067689																		F
CONTIG1539	Q87NZ1_VIBPA	Glycine betaine/L-proline transport system permease	1	O46498_BOVIN	Pregnancy-associated glycoprotein 10	3.9	7LESS_DROVI	Sevenless protein (EC 2.7.1.112)	6.6									F
CD080444	Q5BT27_SCHJA	SJCHGC02953 protein (Fragment)	5.00E-12	Q5BT22_SCHJA	SJCHGC02971 protein	8.00E-07	Q5BSP0_SCHJA	SJCHGC03670 protein	2.00E-04	Q5BRQ9_SCHJA	SJCHGC07642 protein	3.4	Q5DCA4_SCHJA	SJCHGC03534 protein	9.8			F
CONTIG5894	Q5BKF5_XENTR	GRN protein (Fragment)	0.009	O18375_DROME	C901 protein (Fragment)	0.012	Q91W93_MOUSE	Hypothetical protein LOC435285	0.027	Q64526_MOUSE	Ultra-high sulphur keratin	0.035	Q9VZ44_DROME	CG1567-PA	0.035			F
CONTIG11047	Q4QQE8_SCHMA	Endonuclease-reverse transcriptase	4.00E-48	Q5C264_SCHJA	SJCHGC06886 protein (Fragment)	4.00E-32	Q5BSY2_SCHJA	SJCHGC03063 protein	2.00E-11	Q5TRM3_ANOGA	ENSANGP00000027774 (Fragment)	6.00E-11	Q5BT19_SCHJA	SJCHGC02981 protein (Fragment)	1.00E-10			F
Contig2813		UNKNOWN 1603	OM0023394-AOP															F
CD062046																		F
CD197328	Q7QE10_ANOGA	ENSANGP00000000570 (Fragment)	4.00E-06	Q9Y1Y2_9METZ	Protein tyrosine kinase	7.00E-06	HTK16_HYDAT	Tyrosine-protein kinase HTK16 (EC 2.7.1.112)	5.00E-05	SHARK_DROME	Tyrosine-protein kinase shark (EC 2.7.1.112)	0.004	Q4IQ47_GIBZE	Hypothetical protein	0.52			F
CONTIG4546	Q5DAS8_SCHJA	SJCHGC05412 protein	2.00E-07	Q8C514_MOUSE	0 day neonate thymus cDNA, RIKEN full-length enriched library, clone:A430076B15	9.00E-04	Q3US11_MOUSE	16 days embryo head cDNA, RIKEN full-length enriched library, clone:C130077F12 p	9.00E-04	Q811S7_MOUSE	CP2B	9.00E-04	Q60786_MOUSE	NF2d9	9.00E-04			F
>CL737																		F
Contig6685		UNKNOWN 4131	OM0023373-AOP															F
CONTIG8546	Q9PH93_XYLFA	Hypothetical protein	3.00E-05	Q4YFP1_PLABE	Hypothetical protein (Fragment)	1.00E-04	Q8N8E0_HUMAN	Hypothetical protein FLJ39621	0.001	O06023_HAESO	Lob1	0.04	Q99311_HAEIN	Lipopolysaccharide core (lic3) locus. (Fragment)	0.04			F
CD086458																		F
CONTIG5884	PYR1_SQUAC	CAD protein [Includes: Glutamine-dependent carbamoyl-phosphate synthase (EC 6.3	3.00E-38	Q5EI67_BRARE	Carbamoyl-phosphate synthetase 2, aspartate transcarbamylase, and dihydroorotas	9.00E-38	Q5XLV0_BRARE	Carbamoyl-phosphate synthetase 2, aspartate transcarbamylase, and dihydroorotas	9.00E-38	Q53SY7_HUMAN	Hypothetical protein CAD (Fragment)	1.00E-36	Q96CK3_HUMAN	CAD protein (Fragment)	1.00E-36			F
CONTIG5452	Q4RMT6_TETNG	Chromosome 3 SCAF15018, whole genome shotgun sequence	6.9	Q4E9I6_9RICK	Hypothetical protein	6.9												F
Contig4381		UNKNOWN 2778	OM0023355-AOP															F
Contig4545		UNKNOWN 2521 POSSIBLE ANTISENSE	OM0023365-AOP															F
Contig881		UNKNOWN 482	OM0023377-AOP															F
>CL676	Q86EH5_SCHJA	Clone ZZD387 mRNA sequence	1.00E-42	Q8IDA9_PLAF7	Hypothetical protein MAL13P1.295	0.61	Q519P5_ENTHI	Hypothetical protein	0.8	Q7RIU5_PLAYO	2-oxoglutarate dehydrogenase, E2 component, dihydrolipoamide succinyltransferase	1.4	Q7RNL5_PLAYO	Hypothetical protein	1.8			F
CF496515	Q84QV1_ORYSA	Putative type 1 capsule synthesis gene(CapI)	5.5	Q8YPF6_ANASP	Alr4238 protein	9.3	Q98L41_RHILO	Permease protein of oligopeptide ABC transporter	9.3	Q3M5Y2_ANAVA	Phytase (EC 3.1.3.8)	9.3	Q33DL3_TOBAC	Chalcone isomerase	9.3			F
CF500464	Q4QQD7_SCHMA	Reverse transcriptase	1.00E-14	Q4F8Q4_AEDAE	Reverse transcriptase (Fragment)	3.00E-10	Q90Z50_FUGRU	Putative reverse transcriptase	3.00E-09	Q7RTK8_SCHMA	Reverse transcriptase	5.00E-09	Q9GSW3_DROVI	Hypothetical protein	1.00E-08			F
CD159642	Q5BSY9_SCHJA	SJCHGC03050 protein	0.004	Q5BT13_SCHJA	SJCHGC03000 protein (Fragment)	0.01	Q8T5G5_SCHJA	Polyprotein	0.047	Q8MWP9_SCHJA	Polyprotein (Fragment)	0.047	Q5DBA5_SCHJA	SJCHGC09144 protein	1.2			F
CD088285	Q04332_SACKL	ORF 4	2	Q4RNB5_TETNG	Chromosome 1 SCAF15015, whole genome shotgun sequence	9.9												F
CONTIG5572	Q6Y1T6_9LILI	NADH dehydrogenase subunit F (Fragment)	5.5	Q95AX8_9LILI	NADH dehydrogenase subunit F (Fragment)	5.5	Y4233_RHOPA	Putative potassium channel protein RPA4233	7.2									F
CONTIG3552	Q4HBR5_9DEIO	Hypothetical protein	7.00E-21	Q4H8D9_9DEIO	Hypothetical protein	7.00E-21	Q5W7C9_ORYSA	Unknow protein	1.00E-14	Q302M8_STRSU	Hypothetical protein	3.00E-08	Q3X4G5_9ACTN	Hypothetical protein	9.00E-05			F
SMLA22E07	Q7Z3L5_HUMAN	Hypothetical protein DKFZp686H0688	5.8	Q7Z344_HUMAN	Hypothetical protein DKFZp686M09125 (Fragment)	5.8	ANK2_HUMAN	Ankyrin-2 (Brain ankyrin) (Ankyrin B) (Ankyrin, nonerythroid)	5.8	Q8IIU1_PLAF7	Hypothetical protein	7.6						F
CONTIG6588	Q5DBF9_SCHJA	SJCHGC08967 protein	e-108	Q7QBT8_ANOGA	ENSANGP00000020666 (Fragment)	8.00E-61	BCAS2_XENTR	BCAS2 protein homolog	1.00E-60	Q5HZR0_XENLA	LOC496329 protein	5.00E-60	BCAS2_BRARE	BCAS2 protein homolog	2.00E-59			F
CD115841	Q5BSY9_SCHJA	SJCHGC03050 protein	0.18	Q8T5G5_SCHJA	Polyprotein	0.39	Q8MWP9_SCHJA	Polyprotein (Fragment)	0.39	Q5BSF5_SCHJA	SJCHGC04561 protein (Fragment)	7.4	Q5BSC9_SCHJA	SJCHGC05010 protein (Fragment)	7.4			F
CD119992	Q4IGC5_GIBZE	Hypothetical protein	4.4	Q644Z9_9SALA	NADH dehydrogenase subunit 6	5.8												F
CD074715																		F
CD139674																		F
CD091392	Q4QQE8_SCHMA	Endonuclease-reverse transcriptase	8.00E-12	Q5BT30_SCHJA	SJCHGC02932 protein (Fragment)	0.38	Q6TU47_DICDI	GP63 (Peptidase M8 family protein)	5.5	O76495_DICDI	Gp63 homolog	5.5	Q4HFL2_CAMCO	Hypothetical protein	7.2			F
Contig417		SIMILAR TO SPLICING FACTOR U2AF 50 KDA SUBUNIT (U2 AUXILLARY FACTOR 50 KDA SUBUN	OM0023403-AOP															F
SMLA42A08	Q9EMF3_AMEPV	AMV253	1.9	Q674N9_9HEMI	NADH dehydrogenase subunit 2	4.3	Q4YMB2_PLABE	Hypothetical protein (Fragment)	7.4									F
Contig498		UNKNOWN 266 POSSIBLE ANTISENSE	OM0023363-AOP															F
Contig6112		UNKNOWN 3655	OM0023345-AOP															F
CONTIG5015	HRPX_PLALO	Histidine-rich glycoprotein precursor	3.00E-15	Q54QR1_DICDI	Hypothetical protein limA	8.00E-14	P90533_DICDI	LimA (Fragment)	8.00E-14	Q60TB8_CAEBR	Hypothetical protein CBG20540	2.00E-13	Q54YX8_DICDI	Hypothetical protein	2.00E-12			F
CONTIG3407	Q4QQE8_SCHMA	Endonuclease-reverse transcriptase	2.00E-10	Q5BSV8_SCHJA	SJCHGC03153 protein	3.00E-10	Q7PQP8_ANOGA	ENSANGP00000011703	1.8	Q8I465_PLAF7	Unconventional myosin pfm-b	6.7	Q4D1E7_TRYCR	Trans-sialidase, putative	8.7			F
CONTIG3698	Q4QQE8_SCHMA	Endonuclease-reverse transcriptase	8.00E-05	Q4SC32_TETNG	Chromosome 14 SCAF14660, whole genome shotgun sequence. (Fragment)	0.009	Q4RWU7_TETNG	Chromosome 15 SCAF14981, whole genome shotgun sequence. (Fragment)	0.046	Q5BSV8_SCHJA	SJCHGC03153 protein	0.046	Q8BGK4_MOUSE	13 days embryo forelimb cDNA, RIKEN full-length enriched library, clone:5930417L	0.079			F
SMU54586		SCHISTOSOMA MANSONI PRO-HIS-RICH PROTEIN MRNA, PARTIAL CDS	OM0023337-AOP															F
CONTIG3522																		F
Contig4435		UNKNOWN 2816	OM0023355-AOP	CG7071-PA [Drosophila melanogaster]	CG7071-PA [Drosophila melanogaster]													F
SCMU6RNAA		SCHISTOSOMA MANSONI U6 SMALL NUCLEAR RNA	OM0023390-AOP															F
Contig2171		UNKNOWN 1065	OM0023343-AOP															F
CD092162																		F
CD196704	Q2ZN02_SHEPU	PAS:GGDEF	9.8															F
CD120657	Q3ZL50_ESCBL	Host nuclease inhibitor protein	7.6	Q5DEY9_SCHJA	SJCHGC02887 protein	10												F
CONTIG7033	Q4QQE8_SCHMA	Endonuclease-reverse transcriptase	1.00E-50	Q5C0M3_SCHJA	SJCHGC02939 protein (Fragment)	2.00E-40	Q5C264_SCHJA	SJCHGC06886 protein (Fragment)	4.00E-11	Q5BSY8_SCHJA	SJCHGC03051 protein	1.00E-07	O96146_PLAF7	Hypothetical protein PFB0225c	0.006			F
CD072609																		F
CD186784	Q7RB81_PLAYO	Putative yir3 protein (Fragment)	5.9															F
CD085433	Q4QQE8_SCHMA	Endonuclease-reverse transcriptase	6.00E-09	Q5BT19_SCHJA	SJCHGC02981 protein (Fragment)	2.00E-06	Q5DCR7_SCHJA	SJCHGC03163 protein	1.00E-05	Q5DFU9_SCHJA	SJCHGC02281 protein	4.00E-05	Q5C0M3_SCHJA	SJCHGC02939 protein (Fragment)	0.053			F
CONTIG6455	Q26588_SARMU	Microneme antigen (Fragment)	0.01	Q9RKJ0_STRCO	ATP-dependent RNA helicase	0.028	Q6UJY4_TRITU	Hypothetical protein	0.037	Q5VXP1_HUMAN	Splicing factor, arginine\/serine-rich 4 (Splicing factor, arginine/serine-rich	0.048	SFRS4_HUMAN	Splicing factor, arginine/serine-rich 4 (Pre-mRNA splicing factor SRP75) (SRP001	0.048			F
CONTIG3301	Q3MJT3_SCHJA	SJCHGC05140 protein	4.00E-04	Q8T5G5_SCHJA	Polyprotein	8.00E-04	Q8MWP9_SCHJA	Polyprotein (Fragment)	8.00E-04	Q5BT13_SCHJA	SJCHGC03000 protein (Fragment)	0.001	Q8MWP8_SCHJA	Polyprotein (Fragment)	0.001			F
CD127636	Q91GE9_NPVEP	Hypothetical protein	3.4															F
CD068282	Q5BSA3_SCHJA	SJCHGC05284 protein	0.002	Q5BT13_SCHJA	SJCHGC03000 protein (Fragment)	0.09	Q5BSC9_SCHJA	SJCHGC05010 protein (Fragment)	0.12	Q8MWP8_SCHJA	Polyprotein (Fragment)	0.15	Q8T5G5_SCHJA	Polyprotein	0.2			F
CD069172	Q9G8N7_NAEGR	Haem lyase	0.14	O45559_CAEEL	Hypothetical protein srbc-48	7.6												F
CD077797																		F
CD125893																		F
Contig3422d																		F
CD179085	Q4A0V1_STAS1	Putative permease	3.4	Q59JN5_CANAL	Hypothetical protein (Fragment)	3.4	Q65GA8_BACLD	LytS (Two-component sensor histidine kinase)	10									F
Contig692		UNKNOWN 374 POSSIBLE ANTISENSE	OM0023380-AOP	CG3652-PA [Drosophila melanogaster]	CG3652-PA [Drosophila melanogaster]													F
>CL634	Q4QQE8_SCHMA	Endonuclease-reverse transcriptase	1.00E-11	Q5C0M3_SCHJA	SJCHGC02939 protein (Fragment)	5.00E-05	Q5C264_SCHJA	SJCHGC06886 protein (Fragment)	0.002	Q5BSY8_SCHJA	SJCHGC03051 protein	0.048	O87306_BORBU	ElpB2 (ORF29/ElpB2)	0.9			F
SMLA3D10	O49704_ARATH	Hypothetical protein T8O5.20	8.6															F
CD178757	Q5DGM9_SCHJA	SJCHGC02902 protein	1.00E-06	Q8MWP8_SCHJA	Polyprotein (Fragment)	1.00E-05	Q8T5G5_SCHJA	Polyprotein	4.00E-05	Q8MWP9_SCHJA	Polyprotein (Fragment)	4.00E-05	Q3MJT3_SCHJA	SJCHGC05140 protein	5.00E-05			F
CD169238	Q8WZ42_HUMAN	Titin	4.00E-87	Q8WZB3_HUMAN	N2B-Titin Isoform	4.00E-87	Q4U1Z6_HUMAN	Titin protein	4.00E-87	Q4RE89_TETNG	Chromosome undetermined SCAF15134, whole genome shotgun sequence	2.00E-67	Q801W8_BRARE	Novel protein similar to human titin (TTN) (Fragment)	3.00E-66			F
CD116507	Q9XX37_CAEEL	Hypothetical protein	4	Q8RHW0_FUSNN	Hypothetical protein FN1882	5.3	Q8R6K1_FUSNN	Hypothetical protein FN0510 (Hypothetical protein FN1356)	5.3	RADA_CHLPN	DNA repair protein radA homolog (DNA repair protein sms homolog)	5.3	Q5CDX1_CRYHO	Hypothetical protein	6.9			F
CONTIG5847	Q4QQD6_SCHMA	Hypothetical protein	2.00E-10	Q5BRQ9_SCHJA	SJCHGC07642 protein	3.00E-08	Q5BRL0_SCHJA	SJCHGC07876 protein	1.00E-06	Q5D8G9_SCHJA	SJCHGC08115 protein	3.00E-04	Q9GSW1_DROVI	Hypothetical protein	0.11			F
SMLA24A04	Q5BSV8_SCHJA	SJCHGC03153 protein	2.00E-11	Q4QQE8_SCHMA	Endonuclease-reverse transcriptase	5.00E-11	Q5BT30_SCHJA	SJCHGC02932 protein (Fragment)	7.2									F
Contig1055		SIMILAR TO PROHIBITIN (1E-92)	OM0023369-AOP															F
CD131277	Q86KA4_DICDI	Hypothetical protein	1.4	Q47YU7_COLP3	Putative osmoregulated proline transporter	4.1	Q8I339_PLAF7	Hypothetical protein PFI0550w	5.3	Q8IKQ6_PLAF7	Hypothetical protein	6.9	Q7RHM6_PLAYO	Zinc finger C-x8-C-x5-C-x3-H type, putative	9.1			F
CD194497	Q4QQE8_SCHMA	Endonuclease-reverse transcriptase	2.00E-58	Q5BST9_SCHJA	SJCHGC03271 protein (Fragment)	4.00E-28	Q5BRY6_SCHJA	SJCHGC07009 protein (Fragment)	2.00E-11	Q5DHV0_SCHJA	SJCHGC03719 protein	2.00E-08	Q5C3A3_SCHJA	SJCHGC09318 protein (Fragment)	6.00E-08			F
CD201956	Q85H35_ERYGR	RNA polymerase	2.6	Q5NNP6_ZYMMO	TonB-dependent receptor	5.8	Q3KN34_DROME	GH18167p (Fragment)	5.8	Q9W053_DROME	CG33484-PA	5.8	Q8SXC1_DROME	GH09541p	5.8			F
CD195300	Q5DI33_SCHJA	SJCHGC04941 protein	1.00E-24	Q8AE58_9HIV1	Envelope glycoprotein	0.05	Q7ZQU7_9HIV1	Envelope glycoprotein (Fragment)	0.56	Q9IZE4_9HIV1	Gp120 (Fragment)	0.73	Q7RB88_PLAYO	Hypothetical protein (Fragment)	0.73			F
CONTIG1414	Q4SZR5_TETNG	Chromosome undetermined SCAF11537, whole genome shotgun sequence. (Fragment)	9.1	Q4SWR7_TETNG	Chromosome undetermined SCAF13542, whole genome shotgun sequence. (Fragment)	9.1												F
CD184810	Q899X4_CLOTE	Hypothetical protein ctp41	5.9															F
CD090336	Q5ZEK6_ORYSA	Hypothetical protein P0041E11.33	5.8	Q9FE41_ORYSA	Oryza sativa (japonica cultivar-group) genomic DNA, chromosome 1, PAC clone:P043	5.8	Q5CUB7_CRYPV	Hypothetical protein	9.9	Q5CJD9_CRYHO	Hypothetical protein	9.9	ACS2_ZYGBA	Acetyl-coenzyme A synthetase 2 (EC 6.2.1.1) (Acetate--CoA ligase 2) (Acyl-activa	9.9			F
CD202473	Q50KL0_PANTR	Bitter taste receptor T2R39 (Fragment)	7.5	Q50KK9_9PRIM	Bitter taste receptor T2R39 (Fragment)	7.5	Q5UG17_PANTR	Candidate bitter taste receptor TAS2R39 (Fragment)	7.5	Q50KL2_HUMAN	Bitter taste receptor T2R39 (Fragment)	7.5	Q3ZCN6_HUMAN	TAS2R39 protein (Fragment)	7.5			F
CONTIG2516	Q7R7Y0_PLAYO	Hypothetical protein	0.52	Q39WY1_GEOME	Hypothetical protein	0.68	Q54Y92_DICDI	Developmental protein	2.6	Q7RAE0_PLAYO	DNA-dependent RNA polymerase-related (Fragment)	3.4	Q4YX87_PLABE	Hypothetical protein (Fragment)	5.8			F
CONTIG13236	Q4QQF5_SCHMA	Gag-pol polyprotein	3.00E-75	Q4QQF4_SCHMA	Gag-pol polyprotein	3.00E-69	Q4QQF3_SCHMA	Gag-pol polyprotein	1.00E-68	Q4QQF7_SCHMA	Gag-pol polyprotein	2.00E-63	Q4QQF2_SCHMA	Gag-pol polyprotein	2.00E-63			F
CD199939	Q589S3_DUGJA	Beta-catenin	6.00E-05	ARM_ANOGA	Armadillo segment polarity protein	1.00E-04	Q75WU5_ACHTE	Armadillo	9.00E-04	Q76CZ7_GRYBI	Armadillo protein	0.001	ARM_DROME	Armadillo segment polarity protein	0.001			F
CONTIG8400																		F
Contig455		UNKNOWN 249 POSSIBLE ANTISENSE	OM0023365-AOP	hypothetical	hypothetical													F
CONTIG2179	Q4YX92_PLABE	Hypothetical protein (Fragment)	5.2	Q54P54_DICDI	Hypothetical protein	5.2	Q6BUV7_DEBHA	Similar to sp|P38170 Saccharomyces cerevisiae YBL097w BRN1	6.8									F
CD087598	Q3JSP4_BURPS	Hypothetical protein	0.061	Q61SD3_CAEBR	Hypothetical protein CBG06226	0.1	Q54K19_DICDI	Myb domain-containing protein	0.52	Q8FRV8_COREF	Hypothetical protein	0.68	Q3BQ51_XANCV	Large Ala/Gln-rich protein	0.68			F
CF503126	Q5C3A7_SCHJA	SJCHGC06937 protein (Fragment)	3.00E-20	Q8T5G5_SCHJA	Polyprotein	6.00E-19	Q8MWP9_SCHJA	Polyprotein (Fragment)	6.00E-19	Q5C3A3_SCHJA	SJCHGC09318 protein (Fragment)	1.00E-18	Q5C394_SCHJA	SJCHGC09145 protein (Fragment)	1.00E-17			F
CD088434	Q2ZIY1_CALSA	Hypothetical protein precursor	6.00E-08	Q2ZGF2_CALSA	Hypothetical protein	5.00E-07	Q3GFN0_9FIRM	Hypothetical protein	6.00E-07	Q9RXQ4_DEIRA	Hypothetical protein DR0254	2.00E-06	Q9RS75_DEIRA	Hypothetical protein DR2252	2.00E-06			F
CD193686																		F
CF496323	Q5C3C1_SCHJA	SJCHGC04023 protein (Fragment)	1.00E-07	Q8T5G5_SCHJA	Polyprotein	3.00E-07	Q5C387_SCHJA	SJCHGC03776 protein (Fragment)	3.00E-05	Q5C3C6_SCHJA	SJCHGC03094 protein (Fragment)	0.012	Q8MWP9_SCHJA	Polyprotein (Fragment)	0.016			F
CD127952																		F
CONTIG10685	Q4QQE8_SCHMA	Endonuclease-reverse transcriptase	2.00E-06	Q5BSV8_SCHJA	SJCHGC03153 protein	5.00E-05	Q5BT15_SCHJA	SJCHGC02990 protein	0.11	Q5D9Z7_SCHJA	SJCHGC03074 protein	1.2	Q5BSB5_SCHJA	SJCHGC05180 protein	2.6			F
>CL141																		F
CD114232	Q54TR4_DICDI	Hypothetical protein	0.05	Q86KD2_DICDI	Similar to Dictyostelium discoideum (Slime mold). MkpA protein (Hypothetical pro	0.066	Q55BS1_DICDI	Hypothetical protein	0.15	Q55BJ8_DICDI	Hypothetical protein	0.15	Q54MC8_DICDI	Hypothetical protein	0.19			F
CD183841	Q36QV2_MARHY	Hypothetical protein	0.82	Q55C10_DICDI	Hypothetical protein	1.4	Q4E5Y0_TRYCR	Mucin TcMUCII, putative	2.4	Q9ZGA4_9ACTO	FK506 polyketide synthase	4.1	P95814_STRSQ	FK506 polyketide synthase	4.1			F
Contig3063		UNKNOWN 1808 POSSIBLE ANTISENSE	OM0023336-AOP															F
Contig6905		UNKNOWN 4320	OM0023380-AOP															F
SMLA49H12	Q4QQE9_SCHMA	Endonuclease-reverse transcriptase	0.007	Q5SCW0_HUPLU	Acetyl-CoA carboxylase carboxyltransferase beta subunit	7.4	NOTC1_MOUSE	Neurogenic locus notch homolog protein 1 precursor (Notch 1) (Motch A) (mT14) (	9.7									F
CD069043																		F
CD136910																		F
CONTIG10603																		F
CONTIG3119	Q4YTY1_PLABE	Hypothetical protein	2.1	Q7RJM2_PLAYO	Homo sapiens KIAA0910 protein-related	2.1	Q4XK77_PLACH	Hypothetical protein (Fragment)	4.7	Q384Y2_9TRYP	Hypothetical protein	6.1	Q5URQ2_9HEMI	ATP synthase subunit 6	6.1			F
SMLC27G08	Q5C6M0_SCHJA	SJCHGC03060 protein (Fragment)	2.00E-09	Q5DGX7_SCHJA	SJCHGC06365 protein	1.00E-08	Q4YRW3_PLABE	Hypothetical protein (Fragment)	0.46	Q4YDY1_PLABE	Hypothetical protein (Fragment)	0.46	Q4AXW9_9BURK	ABC1 protein	3.9			F
CD092881																		F
>CL292	Q4JBC8_SULAC	Hypothetical protein	0.42	Q54P75_DICDI	DNA mismatch repair protein	1.6												F
CD167541	Q7QIM5_ANOGA	ENSANGP00000021729	2	Q7SZC2_BRARE	Chromosome segregation 1-like	4.4	Q4N2Q3_THEPA	Hypothetical protein	4.4	GCP_XENLA	Probable O-sialoglycoprotein endopeptidase (EC 3.4.24.57)	5.8	Q4SY05_TETNG	Chromosome undetermined SCAF12247, whole genome shotgun sequence	7.6			F
CONTIG1734	Q6LEX8_PLAF7	Putative SET-domain protein (Set-domain protein, putative)	1.5	Q6C6D5_YARLI	Similarity	4.4												F
CD136871	Q5HC04_EHRRW	DNA-directed RNA polymerase beta' chain (EC 2.7.7.6)	1.2	Q5FFD8_EHRRG	DNA-directed RNA polymerase beta' chain	1.2	Q750W7_ASHGO	AGL178Wp	7.6	Q5K4I1_GOSHI	Long chain fatty acid elongation enzyme	10						F
SMLC17E04A	Q26564_SCHMA	Cathepsin L (Fragment)	e-115	Q10834_SCHJA	Preprocathepsin cathepsin L	2.00E-92	Q5DCE5_SCHJA	Hypothetical protein	5.00E-91	Q5DEI8_SCHJA	Hypothetical protein	1.00E-90	Q5DC07_SCHJA	Hypothetical protein	1.00E-90			F
CD159959	Q83CB8_COXBU	Hypothetical protein	0.69	Q38BT6_9TRYP	Glycerol-3-phosphate acyltransferase, putative	1.2												F
CONTIG8087	Q6NXG6_HUMAN	NUP210 protein	7.00E-05	Q9H6C8_HUMAN	Hypothetical protein FLJ22389	3.00E-04	PO210_RAT	Nuclear pore membrane glycoprotein 210 precursor (Nuclear pore membrane glycopr	4.00E-04	Q69ZW2_MOUSE	MKIAA0906 protein (Fragment)	0.001	Q3U031_MOUSE	Activated spleen cDNA, RIKEN full-length enriched library, clone:F830209B08 prod	0.001			F
Contig3422		UNKNOWN 2111	OM0011068-NOP															F
CD143157	Q4YBB2_PLABE	Hypothetical protein	0.01	Q4X807_PLACH	Hypothetical protein (Fragment)	0.01	Q8N962_HUMAN	Hypothetical protein FLJ38312	0.017	Q8NH31_HUMAN	Seven transmembrane helix receptor	0.063	Q64150_MOUSE	Nuclear localization signal binding protein	0.11			F
CD189528																		F
CONTIG3361	Q6E7E2_ECOLI	GmhB	5.1	Q7R9G2_PLAYO	Hypothetical protein	5.1												F
CD123165																		F
CD149964	Q4XUZ5_PLACH	Hypothetical protein (Fragment)	5.9															F
CD154006	Q74KB1_LACJO	Hypothetical protein	0.39	Q54XH0_DICDI	Hypothetical protein	0.66	Q8I413_PLAF7	Chromosome condensation protein, putative	0.86	Q8IE74_PLAF7	Hypothetical protein MAL13P1.133	1.1	Q513P3_ENTHI	Viral A-type inclusion protein repeat, putative	1.5			F
Contig3125		UNKNOWN 1854 POSSIBLE ANTISENSE	OM0023336-AOP	hypothetical	hypothetical													F
CD117950	Q4QQE8_SCHMA	Endonuclease-reverse transcriptase	5.4	Q3CXV0_ALTAT	Phage integrase	9.2												F
Contig5223		UNKNOWN 3067	OM0023332-AOP															F
SMLA29F11	Q22807_CAEEL	Hypothetical protein	0.024	Q6QGY1_VITVI	Merlot proline-rich protein 2	0.032	Q5BWN9_SCHJA	SJCHGC07001 protein (Fragment)	0.054	Q7YUR6_9TRYP	Hypothetical protein	0.054	Q585V1_9TRYP	Hypothetical protein	0.054			F
CONTIG10681	Q4QQE8_SCHMA	Endonuclease-reverse transcriptase	9.00E-19	Q5BT30_SCHJA	SJCHGC02932 protein (Fragment)	2.00E-09	Q5BT13_SCHJA	SJCHGC03000 protein (Fragment)	2.00E-04	Q5BQS2_SCHJA	SJCHGC09829 protein	2.00E-04	Q5DBA5_SCHJA	SJCHGC09144 protein	4.00E-04			F
>CL13	Q94747_SCHMA	Elongation factor 1-alpha	2.00E-97	Q5DGS7_SCHJA	Hypothetical protein	2.00E-91	Q5DEG6_SCHJA	SJCHGC00214 protein	4.00E-91	Q7YW79_SCHJA	Elongation factor 1-alpha	9.00E-91	Q5C193_SCHJA	Hypothetical protein	1.00E-90			F
CONTIG5876	Q4QQD7_SCHMA	Reverse transcriptase	2.00E-09	P79954_XENLA	BMP type II receptor	0.23	Q4Z2N9_PLABE	Hypothetical protein (Fragment)	0.31	Q6GGX3_STAAR	Very large surface anchored protein	0.68	Q8NWQ6_STAAW	Ebh protein	1.5			F
CD186776	Q9LTY1_ARATH	Mitotic checkpoint protein-like	9.9															F
CONTIG4755																		F
CONTIG10452	Q958I8_HYMDI	Cytochrome b	4.5															F
CONTIG7867	Q7RS28_PLAYO	Hypothetical protein	0.047	Q8I3V5_PLAF7	Phosphatidylinositol 3-kinase, putative (EC 2.7.1.137)	2.6	Q6QUQ4_CAEEL	Serine or cysteine protease inhibitor (Fragment)	5.7	Q19651_CAEEL	Serpin protein 8	5.7	Q8IC29_PLAF7	Hypothetical protein MAL7P1.17	9.8			F
CD171420	Q5ATY9_EMENI	Hypothetical protein	4.4	Q92223_EMENI	Chitinase	4.4												F
CD119816																		F
CD201913																		F
Contig6597		UNKNOWN 4066	OM0023344-AOP															F
CD188281	O97234_PLAF7	Hypothetical protein MAL3P2.13	3.6	Q7RB62_PLAYO	Hypothetical protein	4.7												F
>CL1205	Q7RFJ8_PLAYO	Hypothetical protein	2.6	Q7RGA7_PLAYO	Hypothetical protein	7.5												F
CD153137	Q550Z9_DICDI	Hypothetical protein	7.9															F
CD085079																		F
CD078846																		F
CONTIG7885	Q8IKH9_PLAF7	Dynein beta chain, putative	0.48	Q4N950_THEPA	Glutathione synthetase, putative	4.1	Q4S7J9_TETNG	Chromosome 13 SCAF14715, whole genome shotgun sequence. (Fragment)	5.3	Q9I719_PSEAE	Probable cytochrome c oxidase assembly factor	5.3	Q61KF4_CAEBR	Hypothetical protein CBG09390	5.3			F
CD133146	Q4T982_TETNG	Chromosome undetermined SCAF7631, whole genome shotgun sequence	6.00E-15	Q4SME3_TETNG	Chromosome 3 SCAF14553, whole genome shotgun sequence. (Fragment)	6.00E-15	O94887_HUMAN	KIAA0793 protein (Fragment)	2.00E-14	Q3TAP2_MOUSE	Activated spleen cDNA, RIKEN full-length enriched library, clone:F830006D05 prod	1.00E-13	Q91VS8_MOUSE	FERM, RhoGEF and pleckstrin domain protein 2	1.00E-13			F
Contig56		UNKNOWN 27	OM0023347-AOP															F
CD133429	Q5DGP4_SCHJA	SJCHGC01877 protein	1.00E-75	Q9NEH6_DROME	EG:BACH59J11.1 protein (Fbgn0003714;tko protein)	7.00E-33	Q5U1D4_DROME	RH56553p	7.00E-33	RT12_DROME	40S ribosomal protein S12, mitochondrial precursor (MT-RPS12) (Technical knockou	7.00E-33	Q380P3_ANOGA	ENSANGP00000024743	3.00E-32			F
CD087967																		F
CD065837																		F
CD120448	Q7RP35_PLAYO	Sir2-like protein	4.5	Q81IJ9_BACCR	Hypothetical protein	9.9	Q3ELS5_BACTI	Hypothetical protein	9.9									F
CONTIG10830	Q8T5G5_SCHJA	Polyprotein	3.00E-31	Q8MWP9_SCHJA	Polyprotein (Fragment)	3.00E-31	Q5DBA5_SCHJA	SJCHGC09144 protein	5.00E-20	Q5DGM9_SCHJA	SJCHGC02902 protein	1.00E-17	Q5BT13_SCHJA	SJCHGC03000 protein (Fragment)	3.00E-17			F
Contig4795		UNKNOWN 2682	OM0023359-AOP															F
CF495875	Q9GDX3_9LILI	NADH dehydrogenase subunit F (Fragment)	3.4	Q70WQ2_THETE	Hypothetical protein (Fragment)	4.5	G3ST4_BOVIN	Galactose-3-O-sulfotransferase 4 (EC 2.8.2.-) (Galbeta1-3GalNAc 3'-sulfotransfer	4.5	Q30Z06_DESDE	Methyltransferase GidB	5.8	Q6ZP10_HUMAN	Hypothetical protein FLJ26757	7.6			F
CD152626	Q895W7_CLOTE	Conserved protein	7.9															F
CD061105	Q4QQE8_SCHMA	Endonuclease-reverse transcriptase	2.00E-07	Q5C0M3_SCHJA	SJCHGC02939 protein (Fragment)	0.01	Q5BST9_SCHJA	SJCHGC03271 protein (Fragment)	0.016	Q5BVT5_SCHJA	SJCHGC07766 protein (Fragment)	0.69	Q7M449_LEITA	Cryptogene protein G4	3.4			F
CD181411	Q6LEZ3_PLAF7	Plasmodium falciparum chromosome 6, complete sequence; segment 4/5	0.18	Q5CPB6_CRYHO	RNA-binding protein	0.24	Q8I3B5_PLAF7	Hypothetical protein PFI0160w	0.24	Q7RJ02_PLAYO	Ulp1 protease family, C-terminal catalytic domain, putative	0.24	Q54M24_DICDI	Hypothetical protein	0.24			F
CONTIG4814	Q91FR6_IRV6	256R	2.6	Q3HDE8_TRIER	ATP-binding region, ATPase-like	9.8	Q8I3A3_PLAF7	Hypothetical protein PFI0225w	9.8									F
CONTIG11125	Q4QQD7_SCHMA	Reverse transcriptase	6.00E-31	Q7RTK8_SCHMA	Reverse transcriptase	2.00E-11	Q90Z50_FUGRU	Putative reverse transcriptase	3.00E-11	Q4SXU0_TETNG	Chromosome undetermined SCAF12330, whole genome shotgun sequence	2.00E-10	Q6S016_DROME	Reverse transcriptase	4.00E-06			F
CD081187	Q9VBP2_DROME	CG5053-PA (GH01133p)	2.6	Q12234_YEAST	S.cerevisiae chromosome XV reading frame ORF YOR216c (YOR50-6)	2.6	Q9U0H1_PLAF7	DNA polymerase alpha	3.4	Q9TX75_PLAFA	DNA polymerase alpha, DNAPOL alpha (EC 2.7.7.7)	3.4	Q9BHN0_PLAFA	DNA polymerase alpha	3.4			F
CD165246	Q7M6X1_MOUSE	Regulator of sex-limitation candidate 5 (14 days pregnant adult female placenta	5.8	Q7RJC4_PLAYO	Hypothetical protein	7.6												F
>CL309	Q5DEU8_SCHJA	SJCHGC04852 protein	8.00E-28	Q8IDL5_PLAF7	Hypothetical protein PF13_0254	2.6	Q7RPR9_PLAYO	Hypothetical protein (Fragment)	9.8									F
CD077790																		F
CD189424	Q41M89_METBU	Hypothetical protein precursor	0.31															F
SMLC18C09	Q9LU27_ARATH	Gb|AAD40142.1	5	Q8LCJ9_ARATH	Hypothetical protein	5	Q6ZC58_ORYSA	Hypothetical protein P0007D08.32	6.6	Q7XSY3_ORYSA	OSJNBb0056F09.13 protein	8.6						F
>CL1477	Q6ZSJ0_HUMAN	Hypothetical protein FLJ45488	5.6															F
CD069051	Q54NM5_DICDI	Putative GATA-binding transcription factor	0.53	Q9HFS0_SACSE	46.1 kDa protein	0.9	O96256_PLAF7	Hypothetical protein PFB0820c	1.2	Q53PF0_ORYSA	Hypothetical protein	1.5	Q53P84_ORYSA	FHA domain, putative	1.5			F
AF153976		SCHISTOSOMA MANSONI CYTOCHROME C OXIDASE SUBUNIT II (COII) MRNA, PARTIAL CDS; AN	OM0023326-AOP															F
SMLA5D04	Q8T5G5_SCHJA	Polyprotein	0.38	Q8MWP9_SCHJA	Polyprotein (Fragment)	0.38	Q3JVE2_BURPS	Hypothetical protein	0.49	Q5DBA5_SCHJA	SJCHGC09144 protein	1.4	Q3MFT0_ANAVA	K+ channel, inward rectifier	3.2			F
CD069579	Q4PDE9_USTMA	Hypothetical protein	0.91															F
>CL561	Q98RV2_GUITH	Hypothetical protein orf590	0.16															F
>CL1079																		F
CONTIG6320	Q8SPM4_BOVIN	SCO-spondin	4.00E-08	O02661_BOVIN	SCO-spondin (Fragment)	4.00E-08	Q769I3_CIOIN	Von Willebrand Factor like 1 (Fragment)	2.00E-07	Q8CG65_MOUSE	SCO-spondin	2.00E-07	Q700K0_RAT	SCO-spondin	1.00E-06			F
CD195624	Q4XSF3_PLACH	Hypothetical protein	5.7															F
SMLC25H01A	Q8BJX1_MOUSE	12 days embryo female mullerian duct includes surrounding region cDNA, RIKEN ful	3.00E-25	Q8K1J5_MOUSE	CDNA sequence BC031781	3.00E-25	Q6IQ49_HUMAN	C1orf55 protein (Novel protein) (FLJ35382)	6.00E-24	Q7T293_BRARE	Zgc:112095 protein (Fragment)	1.00E-23	Q567F0_BRARE	Hypothetical protein zgc:112095	1.00E-23			F
CD067338																		F
CD086147	Q7RBQ6_PLAYO	Hypothetical protein	7.7															F
CD119793	Q55DH4_DICDI	Hypothetical protein	1.2															F
CD156491	Q4HLF7_CAMLA	Capsular polysaccharide biosynthesis protein	7.6															F
CD087144																		F
CD088218																		F
CONTIG4765	Q4QQE8_SCHMA	Endonuclease-reverse transcriptase	4.00E-77	Q5BT64_SCHJA	SJCHGC02633 protein (Fragment)	2.00E-18	Q5BSE4_SCHJA	SJCHGC04778 protein (Fragment)	2.00E-18	Q5BQS2_SCHJA	SJCHGC09829 protein	5.00E-17	Q8T5G5_SCHJA	Polyprotein	7.00E-15			F
CD097319	Q5CTC6_CRYPV	Hypothetical protein	2	Q8IL62_PLAF7	Hypothetical protein	2.6	Q699M6_SCHGA	NADH dehydrogenase subunit 2	4.5	Q3C6P6_9CLOT	Flagellar biosynthetic protein FlhB	7.7	Q4DA01_TRYCR	Transporter, putative	7.7			F
CONTIG11404	Q2XWK4_LYMST	Nicotinic acetylcholine receptor subunit type I	7.00E-04	Q7ZZP7_BRARE	Nicotinic acetylcholine receptor alpha 2 subunit	0.001	Q2XWL1_LYMST	Nicotinic acetylcholine receptor subunit type B	0.001	Q4T589_TETNG	Chromosome undetermined SCAF9355, whole genome shotgun sequence. (Fragment)	0.001	Q7T2S3_FUGRU	Nicotinic acetylcholine receptor alpha 4 subunit (Fragment)	0.001			F
CD160585	Q5JPX3_ORYSA	OSJNBa0057M08.28 protein	2															F
CD197252	Q9U0L0_PLAF7	Hypothetical protein PFD0375w	5.9															F
CD085444	Q7RTK8_SCHMA	Reverse transcriptase	8.00E-18	Q4F8Q4_AEDAE	Reverse transcriptase (Fragment)	8.00E-05	Q6S016_DROME	Reverse transcriptase	0.003	Q6S015_DROME	Reverse transcriptase	0.003	Q95VB5_DROVI	Reverse transcriptase	0.003			F
CD197169																		F
CD153043	Q95EQ6_9ROSI	Maturase	1.9	Q5KGC2_CRYNE	Methionyl-tRNA formyltransferase, putative	4.2	Q55RW9_CRYNE	Hypothetical protein	4.2	Q95ET7_9ROSI	Maturase (Fragment)	9.4	Q95ES7_BYRCR	Maturase (Fragment)	9.4			F
Contig4614		UNKNOWN 2569	OM0023354-AOP															F
CD167839	Q4QQE8_SCHMA	Endonuclease-reverse transcriptase	8.00E-10	Q5BSV8_SCHJA	SJCHGC03153 protein	4.00E-05	Q4WDI9_ASPFU	Leucyl-tRNA synthetase	0.83	Q7RXR4_NEUCR	Hypothetical protein	1.9	Q9RJK0_STRCO	Hypothetical protein SCO0388	3.2			F
Contig5883		SIMILAR TO ANTIGEN 10-3 PRECURSOR (1E-12)	OM0023352-AOP															F
CD126065	Q4QQE8_SCHMA	Endonuclease-reverse transcriptase	7.6	Q4WX15_ASPFU	Hypothetical protein	9.9												F
CONTIG8948	Q9TAJ0_CAFRO	Orf1103	8.8	Q55AK9_DICDI	Hypothetical protein	8.8	Q75JE3_DICDI	Hypothetical protein	8.8									F
SMLC29F01A	Q5BZD8_SCHJA	SJCHGC04634 protein (Fragment)	2.00E-61	Q4STA8_TETNG	Chromosome 11 SCAF14249, whole genome shotgun sequence. (Fragment)	3.00E-04	Q4SBB9_TETNG	Chromosome undetermined SCAF14676, whole genome shotgun sequence. (Fragment)	0.002	Q3LRV5_LYTVA	Synaptotagmin I	0.002	O16152_STRPU	Synaptotagmin I	0.002			F
CD076274																		F
CD129035	Q4QC15_LEIMA	RNA-binding regulatory protein (Pumilio family), putative	9.9															F
CD086733	Q74MW1_NANEQ	NEQ502	0.9	DYHC_SCHPO	Dynein heavy chain, cytosolic (DYHC)	1.5	Q6KIG1_MYCMO	Expressed protein	2	Q6MBD8_PARUW	Hypothetical protein	2.6	Q4YCP0_PLABE	Hypothetical protein (Fragment)	4.5			F
CD146875																		F
CD098504																		F
CD062149	Q9CTU3_MOUSE	Adult male epididymis cDNA, RIKEN full-length enriched library, clone:9230106F14	2															F
CD079953	Q5SNW2_HUMAN	Chloride channel 6	5.2															F
CD178671	Q56B05_TREHY	Putative bacterial Fe-S oxidoreductase	7.5															F
CD160717	MATK_CHALA	Maturase K (Intron maturase) (Fragment)	4.3	Q9MT86_9CONI	Maturase (Fragment)	7.4	Q9MT85_CHAOB	Maturase (Fragment)	7.4	Q5YKV5_9CONI	Maturase K (Fragment)	7.4	Q5YKV4_CHAOB	Maturase K (Fragment)	7.4			F
CONTIG3877	Q4QQE8_SCHMA	Endonuclease-reverse transcriptase	3.00E-21	Q5D9Z7_SCHJA	SJCHGC03074 protein	2.00E-13	Q5BSV8_SCHJA	SJCHGC03153 protein	5.00E-13	Q4WXB3_ASPFU	Hypothetical protein	0.027	Q5J2V7_9CARY	Maturase K	2			F
CD135283	Q8K4K5_RAT	RGL1	9.00E-22	O00188_HUMAN	LLGL protein	8.00E-21	Q8BN92_MOUSE	12 days embryo eyeball cDNA, RIKEN full-length enriched library, clone:D230035J1	1.00E-20	Q80Y17_MOUSE	Lethal giant larvae homolog (Osteoclast-like cell cDNA, RIKEN full-length enrich	1.00E-20	Q7TNV3_MOUSE	Llglh protein (Lethal giant larvae homolog)	1.00E-20			F
CD116710	Q6CYY9_ERWCT	Putative membrane protein	2.9	Q8XFY5_SALTI	Putative membrane protein	6.4	Q7CPI7_SALTY	Putative inner membrane protein	6.4	Q5PLJ7_SALPA	Putative membrane protein	6.4	Q7AY56_SALTY	Putative endoglucanase	6.4			F
CD197809	DYHC_SCHPO	Dynein heavy chain, cytosolic (DYHC)	2															F
CD156239	Q4QQD3_SCHMA	Gag-pol polyprotein	0.048	Q6GNJ5_XENLA	MGC82736 protein	0.69	Q80WJ1_MOUSE	Gametogenetin protein 1	2	Q66HC8_RAT	Gametogenetin (Predicted) (Ggn_predicted protein)	2	Q5EBP4_MOUSE	Ggn protein	2			F
CD093513																		F
CONTIG3297	Q8BZN1_MOUSE	Adult male diencephalon cDNA, RIKEN full-length enriched library, clone:9330155M	1.3	Q465I8_METBA	Hypothetical protein	1.3	Q60Q76_CAEBR	Hypothetical protein CBG21932 (Fragment)	6.6									F
CD062022	Q4QQE8_SCHMA	Endonuclease-reverse transcriptase	2.00E-20	Q30KW9_SCHMA	Reverse transcriptase SR3-right (Fragment)	4.00E-19	Q30KX0_SCHMA	Reverse transcriptase SR3-left (Fragment)	1.00E-18	Q5DEY9_SCHJA	SJCHGC02887 protein	2.00E-15	Q3KTE0_SCHJA	SJCHGC09723 protein	5.00E-09			F
Contig2948		UNKNOWN 1710	OM0023397-AOP															F
SMLC27E06	Q5C3I4_SCHJA	SJCHGC03138 protein (Fragment)	0.22	Q5BWU8_SCHJA	SJCHGC01965 protein (Fragment)	4.2												F
CONTIG3716	Q8YAP7_LISMO	Lmo0070 protein	1.3	Q70NW5_9BILA	NADH dehydrogenase subunit 5	2.9												F
CONTIG3048	Q4QQE8_SCHMA	Endonuclease-reverse transcriptase	0.29	O57422_XENLA	Melanopsin	9.4												F
CONTIG11974	Q9FV29_ARATH	Defective in exine formation	0.041	Q9SS78_ARATH	MZB10.12 protein	0.09	Q9FV30_ARATH	Defective in exine formation	0.09	Q84TH7_ARATH	Hypothetical protein At3g09090 (Fragment)	0.09	Q8TSE8_METAC	Cell surface protein	0.12			F
CD083538	Q5FNT1_GLUOX	Putative sugar transporter	0.85	Q4LSV6_9BURK	L-fucose permease	4.2	Q44YA9_9BURK	L-fucose permease	4.2	Q39NL5_9BURK	L-fucose permease	4.2						F
CD191600	Q5C0E8_SCHJA	SJCHGC08719 protein (Fragment)	7.00E-11	Q66IR2_XENLA	MGC85510 protein	2.00E-05	Q6DGQ8_BRARE	Zgc:92812	4.00E-05	NDK5_HUMAN	Nucleoside diphosphate kinase homolog 5 (NDK-H 5) (NDP kinase homolog 5) (nm23-H	2.00E-04	Q4SDS7_TETNG	Chromosome 1 SCAF14632, whole genome shotgun sequence. (Fragment)	7.00E-04			F
CONTIG10177	Q4B7L5_BURVI	DNA-binding response regulator, LuxR family	3.8															F
CD064700	RIR1_MYCPN	Ribonucleoside-diphosphate reductase alpha subunit (EC 1.17.4.1) (Ribonucleotide	1.2	Q4UCA4_THEAN	Integral membrane protein family I, putative	5.8	Q4UCA2_THEAN	Integral membrane protein family I, putative	5.8	Q4UCA1_THEAN	Integral membrane protein family I, putative	5.8						F
Contig1767		SIMILAR TO GAG-POL POLYPROTEIN 7E-53	OM0023329-AOP															F
CONTIG10698	Q5C1Y3_SCHJA	SJCHGC03288 protein (Fragment)	2.00E-39	Q5ZMU5_CHICK	Hypothetical protein	3.00E-36	Q9W196_DROME	CG3356-PA (LP03102p)	1.00E-35	Q8AVN3_XENLA	Kiaa0010-prov protein	4.00E-35	Q7SXZ7_BRARE	Ubiquitin protein ligase E3C	1.00E-34			F
CONTIG7705	Q64TA4_BACFR	ATP-dependent DNA helicase	8.00E-10	Q5LCB0_BACFN	Putative helicase	8.00E-10	Q4BXQ8_CROWT	ATP-dependent DNA helicase PcrA	8.00E-10	Q3VRT0_PROAE	UvrD/REP helicase	1.00E-09	Q3VIZ6_9CHLB	UvrD/REP helicase	1.00E-09			F
Contig2791		SIMILAR TO EGGSHELL PROTEIN PRECURSOR (CHORION PROTEIN) 9E-68 POSSIBLE ANTISENSE	OM0023394-AOP															F
CONTIG10480	Q5ZZH6_LEGPH	Hypothetical protein	2.6	Q5X958_LEGPA	Hypothetical protein	2.6	Q8F575_LEPIN	Hypothetical protein	3.4	Q5X0I5_LEGPL	Hypothetical protein	3.4	Q8TJK2_METAC	Cell surface protein	3.4			F
CONTIG1442	Q5DFW8_SCHJA	SJCHGC01837 protein	2.00E-43	Q8I5B2_PLAF7	Hypothetical protein	2.00E-06	Q9N3W8_CAEEL	Hypothetical protein Y46C8AL.2	2.00E-06	Q54MK2_DICDI	Putative tyrosine kinase-like (TKL) protein	3.00E-06	Q675X5_9UROC	Hypothetical protein	6.00E-06			F
CD181555																		F
CD082397	Q33564_9TRYP	CR4 protein	1.8	Q8D296_WIGBR	YjgP protein	2.3	Q556D7_DICDI	Hypothetical protein	2.3	Q4MZH3_THEPA	Hypothetical protein	6.7	Q4Y2Q6_PLACH	Hypothetical protein	8.8			F
CD067993	Q67U26_ORYSA	Putative villin 2	7.8															F
CD115171																		F
CD157234	Q6NUR1_HUMAN	Chromosome condensation protein G	7.00E-17	Q3MJE0_HUMAN	Chromosome condensation protein G	7.00E-17	CND3_HUMAN	Condensin complex subunit 3 (Chromosome-associated protein G) (Condensin subunit	7.00E-17	Q6P4X7_XENTR	Chromosome condensation protein G	3.00E-16	Q6NUF0_XENLA	LOC398088 protein (Fragment)	6.00E-16			F
Contig2147		UNKNOWN 1051	OM0023343-AOP	hypothetical	hypothetical													F
>CL664	Q6KEQ2_DROME	Pol protein	0.19	Q6Q3G6_DROME	Pol protein	0.19	Q962E2_DROME	Pol protein	0.19	Q6J4U7_DROME	Pol protein	0.73	Q5CSL4_CRYPV	K+/H+ antiporter of possible bacterial origin, signal peptide	0.73			F
CONTIG12369	Q4QQE8_SCHMA	Endonuclease-reverse transcriptase	8.00E-25	Q5BT30_SCHJA	SJCHGC02932 protein (Fragment)	0.005	Q5BQS2_SCHJA	SJCHGC09829 protein	0.015	Q5BS58_SCHJA	SJCHGC06058 protein	0.033						F
CD060553																		F
CONTIG3729	Q877Q8_CLOTE	Hypothetical protein CTC00065 (Hypothetical protein CTC00089) (Hypothetical prot	6.00E-63	Q6YQ83_ONYPE	Hypothetical protein	2.00E-44	Q3BKH9_9PROT	Hypothetical protein	2.00E-43	Q3RNV2_9BURK	Hypothetical protein	5.00E-38	Q2ZF07_CALSA	Hypothetical protein	8.00E-31			F
CD200430	Q86EF1_SCHJA	Clone ZZD46 mRNA sequence	3.00E-16	Q9UAX0_CAEEL	Hypothetical protein T12B3.1	9.00E-06	Q61T90_CAEBR	Hypothetical protein CBG05851	2.00E-05	Q4RJQ8_TETNG	Chromosome 13 SCAF15035, whole genome shotgun sequence. (Fragment)	3.00E-04	Q6P3I4_BRARE	Hypothetical protein zgc:77752	7.00E-04			F
CONTIG1389	Q4QQE8_SCHMA	Endonuclease-reverse transcriptase	8.00E-14	Q5C264_SCHJA	SJCHGC06886 protein (Fragment)	8.00E-09	Q5BSY2_SCHJA	SJCHGC03063 protein	4.00E-06	Q5BSY8_SCHJA	SJCHGC03051 protein	0.001	Q3KTJ2_SCHJA	SJCHGC05508 protein (Fragment)	0.002			F
CONTIG4311	Q5C009_SCHJA	SJCHGC06874 protein (Fragment)	2.00E-85	Q5DEA0_SCHJA	SJCHGC06875 protein	2.00E-46	Q5C2C4_SCHJA	SJCHGC06876 protein (Fragment)	1.00E-24	Q3TBC3_MOUSE	B6-derived CD11 +ve dendritic cells cDNA, RIKEN full-length enriched library, c	3.00E-15	Q5SPK7_BRARE	Novel protein similar to human talin 2 (TLN2) (Fragment)	6.00E-15			F
CD068682																		F
SMLC53F03	Q30KW9_SCHMA	Reverse transcriptase SR3-right (Fragment)	2.00E-07	Q30KX0_SCHMA	Reverse transcriptase SR3-left (Fragment)	6.00E-07	Q4QQE8_SCHMA	Endonuclease-reverse transcriptase	3.00E-06	Q5BSE4_SCHJA	SJCHGC04778 protein (Fragment)	3.00E-04	Q3MJW0_SCHJA	SJCHGC03052 protein	0.019			F
Contig2125		UNKNOWN 1034	OM0023330-AOP															F
CONTIG7712	Q8BMN4_MOUSE	Adult male pituitary gland cDNA, RIKEN full-length enriched library, clone:53304	8.00E-26	Q61YG1_CAEBR	Hypothetical protein CBG03556 (Fragment)	2.00E-25	O62446_CAEEL	Hypothetical protein	1.00E-24	Q96KR5_HUMAN	Leishmanolysin-like peptidase, variant 2 (EC 3.4.24.36)	4.00E-24	Q9VH19_DROME	CG3953-PA (RH66426p) (IX-14 protein)	5.00E-23			F
CD071846	Q54JJ9_DICDI	Hypothetical protein	2.6	Q4XF14_PLACH	Hypothetical protein (Fragment)	4.4	Q3Y1H2_ENTFC	Hypothetical protein	7.5									F
CF501162	Q5C387_SCHJA	SJCHGC03776 protein (Fragment)	1.00E-32	Q8T5G5_SCHJA	Polyprotein	1.00E-27	Q5C3C1_SCHJA	SJCHGC04023 protein (Fragment)	6.00E-27	Q8MWP9_SCHJA	Polyprotein (Fragment)	4.00E-25	O76213_SCHMA	Reverse transcriptase (Fragment)	5.00E-12			F
CD202452	Q6AA69_PROAC	Alpha-amylase 3 (EC 3.2.1.1)	1.5															F
SMLA11D01	Q5AG49_CANAL	Hypothetical protein	0.031	Q5AGI5_CANAL	Hypothetical protein	0.069	Q601V9_MYCH2	Hypothetical protein	0.2	Q4AA50_MYCHJ	Putative ABC transporter ATP-binding protein	0.45	Q9G8N7_NAEGR	Haem lyase	0.45			F
Contig386		UNKNOWN 209	OM0023399-AOP															F
Contig2463		UNKNOWN 1309	OM0023340-AOP															F
CONTIG12031	Q8T5G5_SCHJA	Polyprotein	1.00E-22	Q8MWP9_SCHJA	Polyprotein (Fragment)	1.00E-22	Q5DBA5_SCHJA	SJCHGC09144 protein	2.00E-15	Q5BSC9_SCHJA	SJCHGC05010 protein (Fragment)	3.00E-13	Q8MWP8_SCHJA	Polyprotein (Fragment)	9.00E-06			F
CD178723	Q5CZS3_BRARE	ZNF41 protein (Fragment)	7.6															F
CD090200	Q5BSV8_SCHJA	SJCHGC03153 protein	1.2	Q4XP01_PLACH	Hypothetical protein (Fragment)	3.4	Q7RGG5_PLAYO	DnaJ domain, putative (Fragment)	4.5	Q84KZ6_DACRO	LFY-like protein OrcLFY	5.8						F
CD067296	Q7VRE0_BLOFL	Phosphatidate cytidylyltransferase (EC 2.7.7.41)	7.7															F
Contig3817		UNKNOWN 2450 POSSIBLE ANTISENSE	OM0023370-AOP	Guanine nucleotide-binding protein G(i), alpha-2 subunit (Adenylate cyclase-inhi	Guanine nucleotide-binding protein G(i), alpha-2 subunit (Adenylate cyclase-inhi													F
SMU31768		SCHISTOSOMA MANSONI ELASTASE GENE, 3045 BP CLONE, COMPLETE CDS	OM0023338-AOP															F
CONTIG3352	Q55F45_DICDI	Hypothetical protein DDB0229432	0.082	Q86HT9_DICDI	Hypothetical protein	0.31	Q54NP0_DICDI	Hypothetical protein	0.53	Q54RR8_DICDI	Hypothetical protein rdeA	0.69	Q17083_9HYME	Vitellogenin precursor	0.69			F
CD065386	Q5CYR8_CRYPV	Hypothetical protein	7.7															F
CF497289	O76213_SCHMA	Reverse transcriptase (Fragment)	1.00E-04	Q8T5G5_SCHJA	Polyprotein	0.69	Q8MWP9_SCHJA	Polyprotein (Fragment)	0.69	Q5C387_SCHJA	SJCHGC03776 protein (Fragment)	0.9	Q5C3C1_SCHJA	SJCHGC04023 protein (Fragment)	1.2			F
CD089731	Q899S6_CLOTE	DNA polymerase III, beta chain (EC 2.7.7.7)	1.2	Q580H0_9TRYP	Hypothetical protein	7.7												F
CD095657	Q4QQE8_SCHMA	Endonuclease-reverse transcriptase	1.00E-19	Q5BSV8_SCHJA	SJCHGC03153 protein	5.00E-09	Q6LZJ3_METMP	Hypothetical protein	0.28	Q54NQ8_DICDI	Hypothetical protein	4	Q7UI56_RHOBA	Hypothetical protein	8.9			F
CONTIG2544	Q4X5V8_PLACH	Hypothetical protein (Fragment)	4.7	Q4WBH2_ASPFU	C6 transcription factor, putative	4.7	Q54UG2_DICDI	SAP DNA-binding domain-containing protein	6.2	Q8IK03_PLAF7	Hypothetical protein	8.1						F
SMLC30B03A	DYN2_RAT	Dynamin-2 (EC 3.6.5.5)	2.00E-11	Q6Q325_LYTVA	Dynamin	4.00E-11	Q6P122_BRARE	Dynamin 2	5.00E-11	Q9CUM4_MOUSE	Adult male testis cDNA, RIKEN full-length enriched library, clone:4930447P09 pro	5.00E-11	Q3TCR7_MOUSE	NOD-derived CD11c +ve dendritic cells cDNA, RIKEN full-length enriched library,	5.00E-11			F
CONTIG3322	Q8NB63_HUMAN	Hypothetical protein FLJ34185	3.00E-06															F
CD077038	Q83MM9_SHIFL	Aminoacyl-histidine dipeptidase (Peptidase D)	2.8	Q8X7N8_ECO57	Aminoacyl-histidine dipeptidase PepD (Peptidase D)	2.8	Q3Z5A0_SHISS	Aminoacyl-histidine dipeptidase	2.8	Q32J20_SHIDY	Aminoacyl-histidine dipeptidase	2.8	Q325P9_SHIBO	Aminoacyl-histidine dipeptidase	2.8			F
CD148866																		F
CD089675																		F
CONTIG5693	Q5DAW3_SCHJA	SJCHGC08900 protein	1.00E-14	Q3U0P6_MOUSE	Activated spleen cDNA, RIKEN full-length enriched library, clone:F830037D08 prod	0.006	Q8R0K4_MOUSE	RIKEN cDNA 3110023B02	0.006	Q6PK04_HUMAN	MGC16597 protein	0.006	Q8IAJ8_PLAFA	Hypothetical protein PF00_0003 (Fragment)	8.1			F
CONTIG5463	Q7RWN3_NEUCR	Hypothetical protein	3.2	Q6SHB7_9BACT	Hypothetical protein	7.1												F
CD085378																		F
SMLA63C03																		F
CD116512	Q4HNY3_CAMUP	Probable type I restriction enzyme HsdR VC1765	4.6															F
CD111966	Q4QQE8_SCHMA	Endonuclease-reverse transcriptase	0.054	Q4XYC7_PLACH	Hypothetical protein (Fragment)	0.6	Q4XET5_PLACH	Hypothetical protein (Fragment)	0.6	Q30KW9_SCHMA	Reverse transcriptase SR3-right (Fragment)	1.3	Q67ES0_RAT	Putative taste receptor T2R31	1.7			F
Contig6946		UNKNOWN 4356	OM0023380-AOP															F
CONTIG11588	Q5BZU3_SCHJA	SJCHGC03587 protein (Fragment)	9.00E-17	Q5U4T9_XENLA	LOC495497 protein	4.00E-12	Q9BRE9_HUMAN	LENG4 protein	3.00E-11	Q9CY76_MOUSE	8 days embryo whole body cDNA, RIKEN full-length enriched library, clone:5730589	1.00E-08	Q8R1P9_MOUSE	Leukocyte receptor cluster (LRC) member 4 (NOD-derived CD11c +ve dendritic cells	1.00E-08			F
CF496870	Q61SL2_CAEBR	Hypothetical protein CBG06130	3.6	Q5P4A3_AZOSE	Hypothetical protein	7.9												F
CD154212																		F
CF500560	Q5C3C6_SCHJA	SJCHGC03094 protein (Fragment)	6.00E-05	Q5C3C1_SCHJA	SJCHGC04023 protein (Fragment)	0.003	Q5C387_SCHJA	SJCHGC03776 protein (Fragment)	0.11	Q8T5G5_SCHJA	Polyprotein	0.31	Q8MWP9_SCHJA	Polyprotein (Fragment)	0.31			F
CD199326																		F
CONTIG7668	Q8IBP1_PLAF7	Hypothetical protein PF07_0086	0.32	Q4Y4M4_PLACH	Hypothetical protein (Fragment)	1.6												F
Contig2288		UNKNOWN 1154	OM0023342-AOP															F
CD158185	Q8A6B3_BACTN	Phosphoenolpyruvate synthase/pyruvate phosphate dikinase	3.4	Q82MX7_STRAW	Putative LysR-family transcriptional regulator	4.4	Q98S51_GUITH	Hypothetical protein orf141	4.4	Q6CFD5_YARLI	Similar to tr|Q07895 Saccharomyces cerevisiae YLR001c	4.4	Q64Q55_BACFR	Phosphoenolpyruvate synthase	5.8			F
CD132681	Q4QQE8_SCHMA	Endonuclease-reverse transcriptase	7.00E-30	Q5BSV8_SCHJA	SJCHGC03153 protein	2.00E-06	Q6L4B3_SOLDE	Putative polyprotein	0.075	Q5TMF9_ANOGA	ENSANGP00000005174 (Fragment)	0.13	Q8IL30_PLAF7	Hypothetical protein	1.4			F
SMLA6E05	Q59W64_CANAL	Hypothetical protein	0.17	Q54V85_DICDI	Hypothetical protein	0.22	Q4YU67_PLABE	Translation initiation factor if-2, putative	0.38	Q54WY6_DICDI	Hypothetical protein	0.38	Q4X9G8_PLACH	Hypothetical protein (Fragment)	0.49			F
CONTIG5395	Q8IBT9_PLAF7	Hypothetical protein PF07_0067	1.5															F
CF502072	Q4QQE8_SCHMA	Endonuclease-reverse transcriptase	3.00E-20	Q5C264_SCHJA	SJCHGC06886 protein (Fragment)	8.00E-18	Q5TRD1_ANOGA	ENSANGP00000028171 (Fragment)	2.00E-06	Q5TRM3_ANOGA	ENSANGP00000027774 (Fragment)	4.00E-06	Q4R2S8_TRANA	P97Bcnt (Fragment)	4.00E-05			F
CONTIG8567	Q4SRR2_TETNG	Chromosome undetermined SCAF14500, whole genome shotgun sequence. (Fragment)	1.00E-08	Q4S0C5_TETNG	Chromosome 2 SCAF14781, whole genome shotgun sequence. (Fragment)	1.00E-08	Q6GLU2_XENLA	MGC84237 protein	1.00E-08	Q60H67_BRARE	Protocadherin1-alpha-av3-vCP	5.00E-08	Q60H66_BRARE	Protocadherin1-alpha-av3	5.00E-08			F
CD167101	GANAB_PIG	Neutral alpha-glucosidase AB precursor (EC 3.2.1.84) (Glucosidase II alpha subun	8.00E-17	Q7KMM4_DROME	BcDNA.GH04962 (CG14476-PA, isoform A) (Cg14476-pb, isoform b)	2.00E-16	Q3UE86_MOUSE	Bone marrow macrophage cDNA, RIKEN full-length enriched library, clone:G530009P1	2.00E-16	GANAB_MOUSE	Neutral alpha-glucosidase AB precursor (EC 3.2.1.84) (Glucosidase II alpha subun	2.00E-16	Q4R4N7_MACFA	Brain cDNA, clone: QccE-15075, similar to human glucosidase, alpha; neutral AB (	4.00E-16			F
CD118169	Q7ZUN2_BRARE	NIMA (Never in mitosis gene a)-related kinase 2 (Zgc:55602)	3.4															F
Contig6765		UNKNOWN 4200	OM0023374-AOP	hypothetical	hypothetical													F
CONTIG5419	Q9D400_MOUSE	Adult male testis cDNA, RIKEN full-length enriched library, clone:4933425K02 pro	2.00E-14	Q8C0X2_MOUSE	Adult male testis cDNA, RIKEN full-length enriched library, clone:4921513J18 pro	2.00E-14	Q8R3N0_MOUSE	4933425K02Rik protein	2.00E-14	Q4ZJI4_HUMAN	NHE domain-containing 1 protein	8.00E-13	Q8NCV2_HUMAN	Hypothetical protein	8.00E-13			F
CONTIG5955	Q5DB62_SCHJA	SJCHGC06585 protein	3.00E-13	Q6ZR84_HUMAN	Hypothetical protein FLJ46559	0.3	Q6ZTU1_HUMAN	Hypothetical protein FLJ44225	0.52	Q6ZQV8_HUMAN	Hypothetical protein FLJ46861	2	Q5DBE9_SCHJA	SJCHGC01974 protein	2.6			F
CD146056																		F
CONTIG1635	Q587L7_ONCKE	Peroxisome proliferator-activated receptor gamma	0.022	Q587L5_ONCKE	Peroxisome proliferator-activated receptor gamma	0.029	Q9U0J6_PLAF7	Hypothetical protein PFD0445c	0.083	Q8N962_HUMAN	Hypothetical protein FLJ38312	0.11	Q3S407_CALVI	Stripe-b-like protein	0.14			F
CONTIG3855	Q3G760_9DELT	Hypothetical protein	2.6	Q47CG7_DECAR	Hypothetical protein	7.6												F
>CL563																		F
CONTIG3750	Q4QQE8_SCHMA	Endonuclease-reverse transcriptase	3.00E-04	Q5BT15_SCHJA	SJCHGC02990 protein	0.52	Q7S980_NEUCR	Predicted protein	1.2	KR107_HUMAN	Keratin-associated protein 10-7 (Keratin-associated protein 10.7) (High sulfur k	1.5	Q5BSB5_SCHJA	SJCHGC05180 protein	2			F
SMLA28C12	Q8T5G5_SCHJA	Polyprotein	0.004	Q8MWP9_SCHJA	Polyprotein (Fragment)	0.004	Q5DBA5_SCHJA	SJCHGC09144 protein	0.007	Q5BSC9_SCHJA	SJCHGC05010 protein (Fragment)	0.4	Q6LFB2_PLAF7	Hypothetical protein	0.52			F
CD194934	Q25802_PLAFA	RpoD protein	6.2	Q80ZL5_MOUSE	Pla2g1br protein	8.1	Q62028_MOUSE	Phospholipase A2 receptor precursor	8.1									F
CD091606	Q30KW9_SCHMA	Reverse transcriptase SR3-right (Fragment)	6.00E-16	Q4QQE8_SCHMA	Endonuclease-reverse transcriptase	5.00E-15	Q30KX0_SCHMA	Reverse transcriptase SR3-left (Fragment)	1.00E-14	Q5BT64_SCHJA	SJCHGC02633 protein (Fragment)	1.00E-14	Q5BSE4_SCHJA	SJCHGC04778 protein (Fragment)	6.00E-13			F
Contig4163		UNKNOWN 2645	OM0023403-AOP															F
CONTIG7215	Q7QUF5_GIALA	GLP_59_8273_5847	7.6															F
CD117910	Q4QQE8_SCHMA	Endonuclease-reverse transcriptase	3.00E-19	Q5C0M3_SCHJA	SJCHGC02939 protein (Fragment)	2.00E-13	Q5BSZ5_SCHJA	SJCHGC03034 protein	0.18	Q60VU8_CAEBR	Hypothetical protein CBG19388	1.2	Q9KK33_STRPN	Surface protein PspC	3.4			F
CD067355	O97238_PLAF7	Hypothetical protein MAL3P2.17	7.6	Q4YV66_PLABE	Hypothetical protein	9.9	Q8ILB1_PLAF7	NAD(P)H-dependent glutamate synthase, putative	9.9	O61143_PLAFA	NAD(P)H-dependent glutamate synthase	9.9						F
CD069225	Q8IDA8_PLAF7	MAL13P1.296 protein	1.1	Q4Z2Q4_PLABE	Hypothetical protein (Fragment)	5.3												F
CD087115																		F
CONTIG7474	Q6WMT3_BRABE	Cytoplasmic dynein light chain 2	5.00E-31	Q7T3T0_EPIAK	Neuronal nitric oxidse synthase protein inhibitor	1.00E-30	Q6PBH4_BRARE	Zgc:73406	1.00E-30	Q541G4_DROME	LP02196p	1.00E-30	Q60V64_CAEBR	Hypothetical protein CBG19682	1.00E-30			F
CD166700	Q4Z418_PLABE	Hypothetical protein (Fragment)	9.9	Q5CW80_CRYPV	Calpain like thiol protease	9.9												F
Contig6521		SIMILAR TO GUANINE NUCLEOTIDE BINDING PROTEIN GAMMA 12 (3E-05)	OM0023371-AOP															F
CONTIG8200	Q5DEY9_SCHJA	SJCHGC02887 protein	8.00E-05	Q5BRY6_SCHJA	SJCHGC07009 protein (Fragment)	0.001	Q4QQE8_SCHMA	Endonuclease-reverse transcriptase	0.003	Q30KX0_SCHMA	Reverse transcriptase SR3-left (Fragment)	2	Q30KW9_SCHMA	Reverse transcriptase SR3-right (Fragment)	2			F
CONTIG12596	Q4QQE8_SCHMA	Endonuclease-reverse transcriptase	5.00E-18	Q5BQS2_SCHJA	SJCHGC09829 protein	4.00E-11	Q5BSE4_SCHJA	SJCHGC04778 protein (Fragment)	2.00E-09	Q5BT64_SCHJA	SJCHGC02633 protein (Fragment)	2.00E-08	Q5BQT0_SCHJA	SJCHGC09821 protein	6.00E-08			F
Contig2856		UNKNOWN 1628	OM0023394-AOP															F
SMLC32F05																		F
CD166745	Q61402_MOUSE	Gcap1 protein (Fragment)	1.2															F
SMLA47H04	Q5U260_XENLA	Hypothetical protein	9.4															F
CONTIG6095	Q4QQE8_SCHMA	Endonuclease-reverse transcriptase	1.00E-09	Q5BT19_SCHJA	SJCHGC02981 protein (Fragment)	3.00E-04	Q5DFU9_SCHJA	SJCHGC02281 protein	0.003	Q3KTJ2_SCHJA	SJCHGC05508 protein (Fragment)	0.009	Q5C5W5_SCHJA	SJCHGC02282 protein (Fragment)	0.057			F
CD163138																		F
SMLA51H02	Q26608_SCHMA	(Liberia) tandem repeat	0.013															F
CD083143	Q5R8B9_PONPY	Hypothetical protein DKFZp459P1319	6.00E-04	Q6P2E8_HUMAN	Sec6 protein	6.00E-04	Q69YP2_HUMAN	Hypothetical protein DKFZp762K123 (Fragment)	6.00E-04	EXOC3_HUMAN	Exocyst complex component 3 (Exocyst complex component Sec6)	6.00E-04	Q8K0E2_MOUSE	SEC6-like 1 (Adult male hippocampus cDNA, RIKEN full-length enriched library, cl	0.007			F
CD089341	Q4RPU4_TETNG	Chromosome 12 SCAF15007, whole genome shotgun sequence. (Fragment)	6.9															F
CD132327	Q5DEY9_SCHJA	SJCHGC02887 protein	1.00E-22	Q4QQE8_SCHMA	Endonuclease-reverse transcriptase	4.00E-19	Q5BRY6_SCHJA	SJCHGC07009 protein (Fragment)	6.00E-16	Q30KX0_SCHMA	Reverse transcriptase SR3-left (Fragment)	5.00E-12	Q30KW9_SCHMA	Reverse transcriptase SR3-right (Fragment)	5.00E-12			F
CD140495	Q7RPL5_PLAYO	Hypothetical protein	5.9	Q7RGF0_PLAYO	Hypothetical protein	5.9	Q8IAT3_PLAF7	Hypothetical protein MAL8P1.112	5.9									F
Contig2197		UNKNOWN 1083	OM0011067-NOP															F
CD178991	Q4QQE8_SCHMA	Endonuclease-reverse transcriptase	0.19	Q4QAZ2_LEIMA	Hypothetical protein	6												F
CONTIG12723	Q5BT27_SCHJA	SJCHGC02953 protein (Fragment)	8.00E-06	Q4QQD6_SCHMA	Hypothetical protein	3.00E-05	Q5BSP0_SCHJA	SJCHGC03670 protein	7.00E-05	Q5BT22_SCHJA	SJCHGC02971 protein	9.00E-05	Q5DCA4_SCHJA	SJCHGC03534 protein	0.055			F
Contig14		UNKNOWN 7	OM0023384-AOP	agCP12638 [Anopheles gambiae str. PEST]	agCP12638 [Anopheles gambiae str. PEST]													F
CD134344	Q5BR20_SCHJA	SJCHGC09721 protein	0.001															F
Contig4712		UNKNOWN 2628	OM0023331-AOP	hypothetical	hypothetical													F
CD094129																		F
CONTIG9416																		F
CD128938	Q9V483_DROME	CG2999-PC, isoform C	3.00E-43	Q8T049_DROME	LD28927p	3.00E-43	Q8IM87_DROME	CG2999-PA, isoform A	3.00E-43	Q8IM86_DROME	CG2999-PB, isoform B	3.00E-43	O96960_DROME	UNC-13-B protein (Fragment)	4.00E-43			F
Contig4446		UNKNOWN 2821	OM0023355-AOP	hypothetical	hypothetical													F
Contig4207		UNKNOWN 2671	OM0023400-AOP	hypothetical	hypothetical													F
CD111270	Q5C4T6_SCHJA	SJCHGC05856 protein (Fragment)	2.00E-21	Q49AJ5_HUMAN	GPR155 protein	2.00E-05	Q4G0Y6_HUMAN	GPR155 protein	2.00E-05	GP155_PONPY	Protein GPR155	2.00E-05	GP155_HUMAN	Protein GPR155 (G-protein coupled receptor PGR22)	2.00E-05			F
CD067107																		F
CONTIG5771	YCF1_EPIVI	Hypothetical 208 kDa protein ycf1 (ORF 1738)	0.36	Q32UT2_DASHA	NADH dehydrogenase subunit 5	6.7	Q5QS56_PHATA	NADH dehydrogenase subunit 5	6.7									F
CONTIG6975	Q5DG16_SCHJA	Hypothetical protein	e-107	Q5D8P6_SCHJA	Hypothetical protein	1.00E-98	Q7TMS0_MOUSE	Procollagen, type V, alpha 2	1.00E-26	Q3V1J6_MOUSE	0 day neonate skin cDNA, RIKEN full-length enriched library, clone:4631407M23 p	2.00E-26	Q3UHK7_MOUSE	14 days pregnant adult female placenta cDNA, RIKEN full-length enriched library	2.00E-26			F
CD066450	Q5C1I2_SCHJA	SJCHGC03706 protein (Fragment)	2.00E-15	Q6X6Z5_HUMAN	Pancreatic potassium channel TALK-1b	0.001	Q6X6Z4_HUMAN	Pancreatic potassium channel TALK-1c	0.001	Q6X6Z3_HUMAN	Pancreatic potassium channel TALK-1d	0.001	KCNKG_HUMAN	Potassium channel subfamily K member 16 (TWIK-related alkaline pH activated K(+)	0.001			F
CD085171																		F
CD123900	Q5KZP6_GEOKA	Hypothetical conserved protein	3.00E-27	Q81FK7_BACCR	Hypothetical protein	2.00E-21	Q3EKZ9_BACTI	Hypothetical protein	3.00E-21	Q4MSY9_BACCE	Hypothetical protein	4.00E-21	Q63DG1_BACCZ	Hypothetical protein	8.00E-21			F
CD064517	Q33G45_METHU	Hypothetical protein	1.2	Q4E4L6_TRYCR	Hypothetical protein	4.6	Q3C6Y2_9CLOT	Hypothetical protein precursor	7.9									F
Contig6802		UNKNOWN 4229	OM0023374-AOP	collagen alpha 1(XI) chain - chicken (fragment) (pir|S28791)	collagen alpha 1(XI) chain - chicken (fragment) (pir|S28791)													F
CONTIG4270	Q5DCR7_SCHJA	SJCHGC03163 protein	3.00E-21	Q4QQE8_SCHMA	Endonuclease-reverse transcriptase	2.00E-08	Q5BT00_SCHJA	SJCHGC03027 protein	0.002	Q5BSB5_SCHJA	SJCHGC05180 protein	0.11	Q5C3C1_SCHJA	SJCHGC04023 protein (Fragment)	0.18			F
CONTIG3802	Q5STK0_HUMAN	Ral guanine nucleotide dissociation stimulator-like 2	0.14	Q5STJ9_HUMAN	Ral guanine nucleotide dissociation stimulator-like 2 (Fragment)	0.14	Q9BSI0_HUMAN	RGL2 protein (Fragment)	0.14	RGL2_MOUSE	Ral guanine nucleotide dissociation stimulator-like 2 (RalGDS-like factor) (RAS-	0.14	RGL2_HUMAN	Ral guanine nucleotide dissociation stimulator-like 2 (RalGDS-like factor) (RAS-	0.14			F
CONTIG7048	Q4QQE8_SCHMA	Endonuclease-reverse transcriptase	5.00E-22	Q5BSV8_SCHJA	SJCHGC03153 protein	4.00E-08	Q5BT64_SCHJA	SJCHGC02633 protein (Fragment)	2.00E-06	Q5BQS2_SCHJA	SJCHGC09829 protein	2.00E-05	Q5BSE4_SCHJA	SJCHGC04778 protein (Fragment)	3.00E-04			F
CD141170																		F
CD064768	Q9EME7_AMEPV	AMV259	1.2	Q4X2H0_PLACH	Hypothetical protein (Fragment)	2	Q5ZXL7_LEGPH	Sensor histidine kinase	3.4	Q5WYI5_LEGPL	Hypothetical protein	4.5	Q5X733_LEGPA	Hypothetical protein	5.8			F
CONTIG5103	Q7JLI6_CAEEL	Hypothetical protein srx-87	8.5															F
Contig1625		SIMILAR TO FEMALE SPECIFIC EGGSHELL PROTEIN ORF 2 (1E-144)	OM0023385-AOP															F
CD134291	Q60F74_CAEEL	Hypothetical protein Y39D8B.1	3.6	Q5C1N1_SCHJA	SJCHGC02105 protein (Fragment)	4.7	Q8IBG6_PLAF7	Hypothetical protein PF07_0121	4.7	Q9FKQ8_ARATH	Arabidopsis thaliana genomic DNA, chromosome 5, P1 clone:MNA5	6.2	Q7RNC6_PLAYO	KED, putative	6.2			F
CD166516																		F
Contig3948		UNKNOWN 2525 POSSIBLE ANTISENSE	OM0023398-AOP															F
CONTIG5660	Q4QQE7_SCHMA	Hypothetical protein	0	Q7RBW2_PLAYO	CCAAT-box DNA binding protein subunit B (Fragment)	0.082	Q5ZP59_9VIRU	Member of hypothetical family1	0.14	Q4QQE1_SCHMA	Hypothetical protein	0.14	Q71XI5_LISMF	Hypothetical protein	0.24			F
Contig540		UNKNOWN 293 POSSIBLE ANTISENSE	OM0023382-AOP	hypothetical	hypothetical													F
CD094437	Q4QQE2_SCHMA	Endonuclease-reverse transcriptase	3.00E-15	Q4QQE9_SCHMA	Endonuclease-reverse transcriptase	8.00E-05	Q4QQE4_SCHMA	Endonuclease-reverse transcriptase	0.001	Q08525_CHICK	Hypothetical protein	4.5						F
L25919		SCHISTOSOMA MANSONI U1 SMALL NUCLEAR RNA	OM0011068-NOP															F
CONTIG12968	Q4QQE9_SCHMA	Endonuclease-reverse transcriptase	1.00E-38	Q86FE1_SCHJA	Clone ZZD1497 mRNA sequence	1.00E-30	Q4QQE2_SCHMA	Endonuclease-reverse transcriptase	4.00E-18	Q5EFG1_9SCOR	Reverse transcriptase (Fragment)	1.00E-14	O18520_SCHMA	Pol (Fragment)	1.00E-14			F
CONTIG1563	Q3UPN4_MOUSE	2 days pregnant adult female ovary cDNA, RIKEN full-length enriched library, clo	7.00E-04	Q80TI1_MOUSE	MKIAA1200 protein (Fragment)	7.00E-04	Q9ULM0_HUMAN	KIAA1200 protein (Fragment)	0.004	Q7PUU6_ANOGA	ENSANGP00000007905 (Fragment)	0.037	Y34F_DROME	Hypothetical protein CG12467 in chromosome 1	0.048			F
CD149639	Q4QQE2_SCHMA	Endonuclease-reverse transcriptase	5.00E-17	Q4QQE4_SCHMA	Endonuclease-reverse transcriptase	2.00E-07	Q4QQE9_SCHMA	Endonuclease-reverse transcriptase	9.00E-06	Q55CS5_DICDI	Hypothetical protein	9.2	P91243_CAEEL	Dnaj domain (Prokaryotic heat shock protein) protein 9	9.2			F
CONTIG4810	KTNB1_STRPU	Katanin p80 WD40-containing subunit B1 (Katanin p80 subunit B1) (p80 katanin)	2.00E-07	Q5ZCG1_ORYSA	Katanin p80 (WD40-containing) subunit B 1-like protein	4.00E-05	Q67UR9_ORYSA	Putative TAF5	6.00E-05	Q4Q7R7_LEIMA	WD-40 repeat protein	6.00E-05	Q7QQL1_GIALA	GLP_66_17561_13728	1.00E-04			F
CONTIG8347	Q7RM75_PLAYO	Protein phosphatase (Fragment)	3.4	Q6BP90_DEBHA	Similar to CA5075|IPF3610 Candida albicans IPF3610 unknown function	3.4	Q4P5F2_USTMA	Hypothetical protein	5.8									F
>CL469	Q4R3V9_MACFA	Testis cDNA clone: QtsA-13853, similar to human hypothetical protein FLJ32859 (F	1.00E-04	Q95JW4_MACFA	Hypothetical protein	1.00E-04	Q9VH99_DROME	CG9434-PA	0.002	Q9BH93_DROME	Frost protein precursor (Frost precursor)	0.002	Q7RG09_PLAYO	Late embryogenesis abundant protein, putative	0.011			F
CD157323	COS4_YEAST	Protein COS4	4.5	COS2_YEAST	COS2/COS3 protein	4.5												F
CD169902																		F
SMLA14F02	Q6NE85_NEUCR	Hypothetical protein 45B12.100	1.1	Q53MV9_ORYSA	Hypothetical protein	7												F
>CL1016																		F
CD184290																		F
Contig2231		SIMILAR TO PUTATIVE NAD (P) H OXIDOREDUCTASE YCAK (EC 1.6.99.-) 2E-12 POSSIBLE A	OM0023343-AOP															F
CD167266	Q5C1G2_SCHJA	SJCHGC03409 protein (Fragment)	0.41	Q6Q138_BOVIN	Glycyl-tran synthetase (Fragment)	1.2	Q5ZHR4_CHICK	Hypothetical protein	1.6	Q5I0G4_RAT	Gars_predicted protein (Fragment)	2	Q3UK01_MOUSE	TIB-55 BB88 cDNA, RIKEN full-length enriched library, clone:I730038J10 product:g	2			F
Contig1277		UNKNOWN 625	OM0023353-AOP															F
CONTIG7234	Q5BWM7_SCHJA	SJCHGC07821 protein (Fragment)	3.00E-31	Q5A8T4_CANAL	Agglutinin-like ALS1 protein	0.95	Q5A8L0_CANAL	Agglutinin-like ALS1 protein	0.95	ALS1_CANAL	Agglutinin-like protein 1 precursor	0.95	Q6CFY3_YARLI	Similar to wi|NCU01254.1 Neurospora crassa NCU01254.1 hypothetical protein	1.6			F
CONTIG9605	Q5DDY8_SCHJA	SJCHGC01219 protein	4.00E-35	Q5D923_SCHJA	Hypothetical protein	4.00E-35	Q4RLL5_TETNG	Chromosome 10 SCAF15019, whole genome shotgun sequence. (Fragment)	7.00E-25	Q8IWT0_HUMAN	Archease (ARCH)	1.00E-24	Q566V0_BRARE	Hypothetical protein zgc:112460	2.00E-24			F
CONTIG7689	Q90Z51_CHICK	Breast and ovarian cancer susceptibility-like protein	3.00E-05	Q4Z2L1_PLABE	C3h4-type ring finger protein, putative (Fragment)	6.00E-05	Q7RFR2_PLAYO	Similar to CG8974 gene product-related	6.00E-05	BRCA1_RAT	Breast cancer type 1 susceptibility protein homolog	6.00E-05	Q6T8H0_TETNG	Breast cancer 1	8.00E-05			F
CD091369	Q7RNZ2_PLAYO	Hypothetical protein (Fragment)	2	Q4Z0I0_PLABE	Hypothetical protein	3.4	Q93Y69_ORYSA	Putative gag-pol	7.5									F
CD164507	Q6AWH0_DROME	LD12631p	0.027	USH_DROME	Zinc-finger protein ush (U-shaped protein)	0.027	Q7PW75_ANOGA	ENSANGP00000005216 (Fragment)	0.18	Q3S409_CALVI	U-shaped-like protein (Fragment)	0.18	Q5BLG9_BRARE	Hypothetical protein zgc:113100	1.2			F
CONTIG6632	Q8T9E1_DROME	SD04681p	2.2	Q9VP22_DROME	CG7597-PA, isoform A (Cg7597-pb, isoform b)	6.4	Q54NW3_DICDI	Hypothetical protein	8.3									F
SMLA21G06	Q4PBH0_USTMA	Hypothetical protein	0.9	Q5C3I4_SCHJA	SJCHGC03138 protein (Fragment)	1.2	Q4WTT4_ASPFU	Hypothetical protein	7.6									F
CD094356	SEPT3_MOUSE	Neuronal-specific septin-3	0.96	Q8IID3_PLAF7	Hypothetical protein	3.7	Q8C8C9_MOUSE	10 days neonate cerebellum cDNA, RIKEN full-length enriched library, clone:B9300	4.8	Q62098_MOUSE	Mus musculus ORFs (putative primordial protein), complete cds	6.2	GALT6_BOVIN	Polypeptide N-acetylgalactosaminyltransferase 6 (EC 2.4.1.41) (Protein-UDP acety	6.2			F
Contig815		SIMILAR TO CG7818 PROTEIN 1E-22	OM0023377-AOP															F
CD085353	Q8G4P1_BIFLO	Hypothetical protein	1.6	Q61B96_CAEBR	Hypothetical protein CBG13444	4.6	Q4KMJ6_BRARE	Hypothetical protein zgc:110016	5.9	Q5DJU3_SPECI	Origin recognition complex subunit 3-like	5.9	Q4Y228_PLACH	Hypothetical protein	7.8			F
Contig799		UNKNOWN 456	OM0023383-AOP															F
SMLC53H12																		F
Contig3441		UNKNOWN 2128	OM0023362-AOP															F
CONTIG10887	Q5C0X6_SCHJA	SJCHGC02960 protein (Fragment)	1.00E-13	Q90Z50_FUGRU	Putative reverse transcriptase	7.00E-13	Q7RTK8_SCHMA	Reverse transcriptase	4.00E-12	Q4F8Q4_AEDAE	Reverse transcriptase (Fragment)	1.00E-08	Q5BX83_SCHJA	SJCHGC03156 protein (Fragment)	1.00E-05			F
Contig220		UNKNOWN 132	OM0023343-AOP	hypothetical	hypothetical													F
CD152740	Q7RTK8_SCHMA	Reverse transcriptase	5.00E-06	Q6VXF5_ENTFC	Putative enterococcal surface protein (Fragment)	1.5	Q577M1_BRUAB	Hypothetical membrane protein (Hypothetical protein)	5.8	Q8YBT0_BRUME	PUTATIVE TRANSMEMBRANE PROTEIN	5.8	Q8FWJ3_BRUSU	Membrane protein, putative	5.8			F
CD201502	Q5BT13_SCHJA	SJCHGC03000 protein (Fragment)	0.002	Q5BSC9_SCHJA	SJCHGC05010 protein (Fragment)	0.002	Q8T5G5_SCHJA	Polyprotein	0.005	Q8MWP9_SCHJA	Polyprotein (Fragment)	0.005	Q5DGM9_SCHJA	SJCHGC02902 protein	0.011			F
CONTIG8322	Q8IBU0_PLAF7	Hypothetical protein PF07_0066	0.53	Q54YY3_DICDI	Hypothetical protein	1.5	Q8IBZ6_PLAF7	Cg2 protein	2.6	O15801_PLAFA	CG2	2.6	O15792_PLAFA	CG2	2.6			F
CD185931	Q8IKV0_PLAF7	Hypothetical protein	4.4															F
CD112208	Q51CF0_ENTHI	Protein kinase, putative	2.6	Q18933_CAEEL	Hypothetical protein	2.6	Q07317_GIALA	Variant-specific surface protein 1267 precursor	2.6	FURIN_HUMAN	Furin precursor (EC 3.4.21.75) (Paired basic amino acid residue cleaving enzyme)	2.6	Q8CIY1_MOUSE	Furin (Fragment)	3.4			F
CD145274	Q6CI62_YARLI	Similar to sp|P32447 Saccharomyces cerevisiae YJL115w ASF1 anti-silencing protei	1.5															F
CD192346	Q4DBD4_TRYCR	Hypothetical protein	7.7															F
CD202456	Q5DE91_SCHJA	SJCHGC03963 protein	8.00E-39	Q5W724_ORYSA	Hypothetical protein OSJNBa0017J22.6	0.029	Q6G038_BARQU	Hypothetical protein tatB	1.6	Q7RPD3_PLAYO	Rhoptry protein	1.6	Q8I2F2_PLAF7	Hypothetical protein PFI1780w	2.7			F
CD182163	Q4QF03_LEIMA	Hypothetical protein	4.4	Q8ILE1_PLAF7	Hypothetical protein	9.8												F
CD187784	Q04702_SCHMA	SmIrV1 protein	6.3															F
CD195223	Q8T5G5_SCHJA	Polyprotein	3.00E-04	Q8MWP9_SCHJA	Polyprotein (Fragment)	3.00E-04	Q8MWP8_SCHJA	Polyprotein (Fragment)	3.00E-04	Q3MJT3_SCHJA	SJCHGC05140 protein	0.001	Q5BSA3_SCHJA	SJCHGC05284 protein	0.003			F
Contig2869		UNKNOWN 1638	OM0023394-AOP	histidine-rich protein - Plasmodium lophurae (fragment) (pir|A54523)	histidine-rich protein - Plasmodium lophurae (fragment) (pir|A54523)													F
>CL761																		F
CONTIG3285	Q86EQ1_SCHJA	Clone ZZD1549 mRNA sequence	e-156	Q7Q4W4_ANOGA	ENSANGP00000010307 (Fragment)	2.00E-26	Q61FQ3_CAEBR	Hypothetical protein CBG11538	1.00E-25	CIA30_CAEEL	Probable complex I intermediate-associated protein 30, mitochondrial precursor	5.00E-25	Q8T3R5_DROME	AT05708p	8.00E-24			F
>CL134	Q5DCB4_SCHJA	SJCHGC05854 protein	e-110	Q6INX3_XENLA	MGC80075 protein	5.00E-48	K0152_MOUSE	Protein KIAA0152 precursor	1.00E-46	K0152_RAT	Protein KIAA0152 precursor	2.00E-46	K0152_HUMAN	Protein KIAA0152 precursor	2.00E-46			F
CD152604																		F
Contig6315		UNKNOWN 3820	OM0023372-AOP	hypothetical	hypothetical													F
>CL1283	Q4PBV9_USTMA	Hypothetical protein	0.18	Q9NFB6_PLAF7	Erythrocyte membrane protein 1 (PfEMP1)	0.41	Q5CYD5_CRYPV	Separin (Caspase fold protease)	1.5	Q5KNC5_CRYNE	Chromatin assembly complex protein, putative	2.6	Q55Z09_CRYNE	Hypothetical protein	2.6			F
CONTIG7345	Q8T601_SCHJA	Reinfection related protein 338	0.004	Q9VGX9_DROME	CG14690-PA	0.69	Q592P5_LYMST	Hypothetical protein (Fragment)	4.5									F
CD088613	Q6ZRM1_HUMAN	Hypothetical protein FLJ46255	0.082	Q4YLP4_PLABE	Hypothetical protein	0.41	Q4S5H0_TETNG	Chromosome 3 SCAF14730, whole genome shotgun sequence	0.7	Q01487_RATRT	Zinc finger protein AT-BP2 (Fragment)	1.6	Q8N8E0_HUMAN	Hypothetical protein FLJ39621	2			F
AI820497	Q4N1N7_THEPA	Hypothetical protein	1.2	CXI16_CONRA	I-superfamily conotoxin R11.16	2	Q4YK26_PLABE	Hypothetical protein (Fragment)	4.5									F
CONTIG2940	Q7Q595_ANOGA	ENSANGP00000011464	4.00E-34	Q9V400_DROME	CG10504-PA (LD24671p) (Putative integrin-linked kinase)	8.00E-34	Q614Y0_CAEBR	Hypothetical protein CBG15792 (Fragment)	3.00E-32	Q9TZC4_CAEEL	Paralysed arrest at two-fold protein 4	8.00E-32	Q9NHC7_DROME	Integrin-linked kinase	8.00E-32			F
CD085383	Q7XJ24_ORYSA	Hypothetical protein P0478E02.2	9.7															F
CD129598																		F
>CL176	Q9FHT3_ARATH	Emb|CAB69840.1	5.8															F
Contig6529		UNKNOWN 4005	OM0023371-AOP															F
CD191969	Q86E32_SCHJA	Clone ZZZ284 mRNA sequence (High mobility group B1)	0.9	Q6RYS1_SCHMA	High mobility group B1 protein	0.9	Q6Q478_SCHHA	High mobility group B1 protein	2	Q71X29_LISMF	Cell wall surface anchor family protein	5.9	Q4EHY1_LISMO	Cell wall surface anchor family protein	5.9			F
CF495603	Q8T5G5_SCHJA	Polyprotein	8.00E-05	Q8MWP9_SCHJA	Polyprotein (Fragment)	8.00E-05	Q5DBA5_SCHJA	SJCHGC09144 protein	0.004	Q5BTL3_SCHJA	Reverse transcriptase	0.022	Q86801_TAV	Capsid protein protein	2.6			F
SMLA37E10	Q67YC2_ARATH	Auxin-responsive protein IAA1	1.7	IAA1_ARATH	Auxin-responsive protein IAA1 (Indoleacetic acid-induced protein 1)	1.7	ARNA_WIGBR	Bifunctional polymyxin resistance arnA protein [Includes: UDP-glucuronic acid de	3	O01865_CAEEL	Hypothetical protein	6.6						F
CONTIG2407	Q5C109_SCHJA	SJCHGC06374 protein (Fragment)	1.00E-55	Q5C110_SCHJA	SJCHGC04420 protein (Fragment)	4.00E-46	Q9NJ24_SCHMA	Alpha 1-3 fucosyltransferase (EC 2.4.1.152)	3.00E-45	Q5DEB8_SCHJA	SJCHGC04427 protein	8.00E-45	Q7QBF7_ANOGA	ENSANGP00000014791 (Fragment)	2.00E-36			F
CONTIG10909	Q4QQE8_SCHMA	Endonuclease-reverse transcriptase	1.00E-68	Q5DEY9_SCHJA	SJCHGC02887 protein	8.00E-58	Q30KX0_SCHMA	Reverse transcriptase SR3-left (Fragment)	1.00E-55	Q30KW9_SCHMA	Reverse transcriptase SR3-right (Fragment)	3.00E-55	Q3KTE0_SCHJA	SJCHGC09723 protein	3.00E-19			F
CD061947	Q26582_SCHMA	Heat shock protein 86 (Fragment)	0.001	Q5D947_SCHJA	SJCHGC00820 protein	0.007	Q86E38_SCHJA	Clone ZZZ255 mRNA sequence	0.007	Q6USB9_9BIVA	Heat shock protein 90	0.08	Q5DK82_HETTR	Heat shock protein 90 (Fragment)	0.14			F
Contig2815		UNKNOWN 1605 POSSIBLE ANTISENSE)	OM0023394-AOP															F
Contig1088		UNKNOWN 558	OM0023369-AOP															F
SMLA3B04	VG37_BPT2	Long tail fiber protein p37 (Protein Gp37) (Receptor recognizing protein)	5	Q4WZI7_ASPFU	Glucosyltransferase	6.5	O21310_TETPY	Hypothetical protein (Orf98)	8.5									F
CONTIG5371	Q8T5G5_SCHJA	Polyprotein	0.24	Q8MWP9_SCHJA	Polyprotein (Fragment)	0.24												F
CD082435	Q5DDP1_SCHJA	Hypothetical protein	0.002	Q8IE55_PLAF7	Hypothetical protein MAL13P1.145	7.1												F
CONTIG1878	Q5DD11_SCHJA	SJCHGC04670 protein	1.00E-22															F
Contig2964		UNKNOWN 1723 POSSIBLE ANTISENSE	OM0023397-AOP															F
Contig3551		UNKNOWN 2226	OM0023361-AOP	hypothetical	hypothetical													F
CD181340	Q6E795_SAPFE	Sec-independent transporter protein	2.6	Q60UB1_CAEBR	Hypothetical protein CBG20083 (Fragment)	5.8												F
CD123813																		F
CONTIG3578	PCXB_ACIAD	Protocatechuate 3,4-dioxygenase beta chain (EC 1.13.11.3) (3,4-PCD)	2.00E-62	Q8XZG0_RALSO	PROBABLE PROTOCATECHUATE 3,4-DIOXYGENASE (BETA CHAIN) OXIDOREDUCTASE PROTEIN (EC	2.00E-45	Q89SR7_BRAJA	Protocatechuate 3,4-dioxygenase beta chain	2.00E-37	Q3PKV9_PARDE	Intradiol ring-cleavage dioxygenase	3.00E-34	Q7CV77_AGRT5	AGR_L_656p (Protocatechuate 3,4-dioxygenase beta chain)	3.00E-34			F
CONTIG5086	Q6ZSJ0_HUMAN	Hypothetical protein FLJ45488	0.041	Q6ZVA9_HUMAN	Hypothetical protein FLJ42813	0.053	Q4D6G9_TRYCR	Hypothetical protein	0.091	Q5DBE9_SCHJA	SJCHGC01974 protein	0.12	Q61402_MOUSE	Gcap1 protein (Fragment)	0.2			F
Contig5566		UNKNOWN 3283	OM0023347-AOP															F
Contig6748		UNKNOWN 4187	OM0023374-AOP	similar to Leishmania major. Ppg3 [Dictyostelium discoideum]	similar to Leishmania major. Ppg3 [Dictyostelium discoideum]													F
CD191346	Q5N4M6_SYNP6	Cytoplasmic membrane protein	2	Q31PJ8_SYNP7	Cytoplasmic membrane protein	2												F
CONTIG10995	Q8RBH2_THETN	Transposase	2.00E-39	Q8RCM3_THETN	Transposase	4.00E-39	Q8RCC1_THETN	Transposase	4.00E-39	Q8RBF5_THETN	Transposase	4.00E-39	Q8RA51_THETN	Transposase	4.00E-39			F
AI067052	Q8IEA1_PLAF7	Hypothetical protein MAL13P1.116	7.5	Q6APX8_DESPS	Hypothetical protein	9.8												F
CD062747	Q4QQE8_SCHMA	Endonuclease-reverse transcriptase	1.00E-08	Q5D9Z7_SCHJA	SJCHGC03074 protein	1.5	Q805Q1_HCMV	RL5A	5.8	Q4Y7Q5_PLACH	Hypothetical protein (Fragment)	5.8	Q5BSV8_SCHJA	SJCHGC03153 protein	5.8			F
CONTIG10476	Q6P3I4_BRARE	Hypothetical protein zgc:77752	4.00E-05	Q8BKD9_MOUSE	0 day neonate eyeball cDNA, RIKEN full-length enriched library, clone:E130020P12	7.00E-04	Q6NZK8_MOUSE	Expressed sequence AW456874	7.00E-04	Q3V3Y0_MOUSE	Adult male pituitary gland cDNA, RIKEN full-length enriched library, clone:53304	7.00E-04	Q3V3K9_MOUSE	Adult male hypothalamus cDNA, RIKEN full-length enriched library, clone:A230075N	7.00E-04			F
CD148742																		F
CD201501	Q75DB8_ASHGO	ABR108Cp	4.4	Q7RF42_PLAYO	Helicase conserved C-terminal domain, putative (Fragment)	9.8												F
>CL313	Q4QQF6_SCHMA	Gag-pol polyprotein (Fragment)	7.00E-19	Q4QQF7_SCHMA	Gag-pol polyprotein	4.00E-11	Q5C201_SCHJA	SJCHGC05312 protein (Fragment)	5.00E-09	Q4QQF5_SCHMA	Gag-pol polyprotein	4.00E-08	Q5TRA9_ANOGA	ENSANGP00000014227	2.00E-06			F
CONTIG5539	Q5NNK2_ZYMMO	Hypothetical protein	5.3	Q8IB07_PLAF7	Hypothetical protein MAL8P1.75	6.9												F
>CL982	Q6IFU2_SCHMA	Pol polyprotein	3.00E-12	Q4QQE6_SCHMA	Endonuclease-reverse transcriptase	4.00E-05	Q4JIV5_9SCOR	Reverse transcriptase (Fragment)	1.1	Q8F0X0_LEPIN	Glucans biosynthesis protein mdoC	7.4	Q72U70_LEPIC	Hypothetical protein	7.4			F
CD086276	Q12066_YEAST	ORF 2416 protein (S.cerevisiae chromosome IV reading frame ORF YDL089w)	4.5	Q9SEA2_GUITH	Putative helicase-like protein	5.8	Q4YYP9_PLABE	Hypothetical protein	7.6									F
CONTIG6526																		F
Contig3842		UNKNOWN 2467	OM0023370-AOP															F
CD140104	Q5DEE0_SCHJA	SJCHGC09496 protein	4.00E-19	Q9C4V5_SULIS	ORF779	2.6	Q5W2S2_SULIS	Hypothetical protein	5.9	O93695_9CREN	Hypothetical protein	5.9						F
CONTIG7465	Q4SBP6_TETNG	Chromosome 18 SCAF14665, whole genome shotgun sequence. (Fragment)	3.00E-53	Q4SPA5_TETNG	Chromosome undetermined SCAF14541, whole genome shotgun sequence	5.00E-53	ABCG2_MACMU	ATP-binding cassette sub-family G member 2	1.00E-52	ABCG2_RAT	ATP-binding cassette sub-family G member 2 (Breast cancer resistance protein 1 h	2.00E-52	Q4W5I3_HUMAN	Hypothetical protein ABCG2 (Fragment)	5.00E-52			F
CD086256																		F
SMLC54G08	Q4QQE8_SCHMA	Endonuclease-reverse transcriptase	6.00E-32	Q5BSV8_SCHJA	SJCHGC03153 protein	3.00E-05	Q6L4B3_SOLDE	Putative polyprotein	0.027	Q5TMF9_ANOGA	ENSANGP00000005174 (Fragment)	0.036	Q710I1_9MAGN	Putative MADS600 protein (Fragment)	9.8			F
CONTIG8213	Q8I1Z6_PLAF7	Hypothetical protein PFD0160w	3.4	Q86DM3_CAEEL	Serpentine receptor, class v protein 26	5.8	Q8ILR9_PLAF7	Hypothetical protein	7.6									F
CD154774																		F
CD096950	Q4LX69_9BURK	Major facilitator superfamily	0.88	Q392I1_9BURK	Major facilitator superfamily (MFS_1) transporter	0.88	Q3FG29_9BURK	Major facilitator superfamily	0.88	Q63KN4_BURPS	Putative MFS family sugar transporter protein	2.6	Q62CE5_BURMA	Major facilitator family transporter	2.6			F
Contig2733		UNKNOWN 1554	OM0023391-AOP															F
CF499612	Q8MTP7_BIOGL	Reverse transcriptase-like protein 75 (Fragment)	2.00E-32	P91581_CIOIN	COS41.3	8.00E-32	Q69ZA7_MOUSE	MKIAA1769 protein (Fragment)	0.53	O04013_VOLCA	Reverse transcriptase, gag, polyprotein	0.91	Q5TVX8_ANOGA	ENSANGP00000026105 (Fragment)	0.91			F
Contig3776		SIMILAR TO POLYPROTEIN (5E-13) POSSIBLE ANTISENSE	OM0023370-AOP															F
CD136510																		F
CONTIG8773	Q5BX60_SCHJA	SJCHGC07989 protein (Fragment)	5.00E-33															F
CD192045																		F
CD084402	CAPP1_SACHY	Phosphoenolpyruvate carboxylase, housekeeping isozyme (EC 4.1.1.31) (PEPCase) (P	1.2	Q5JLS6_ORYSA	Putative phosphoenolpyruvate carboxylase 1	1.5	O82724_VICFA	Pepc2 protein (Phosphoenolpyruvate carboxylase protein) (Fragment)	2.6	Q8H945_LOTJA	Phosphoenolpyruvate carboxylase (EC 4.1.1.31)	5.7	Q8YZH6_ANASP	Alr0484 protein	7.5			F
CD088737																		F
CD081057																		F
CD156315	Q8DS87_STRMU	Putative ABC transporter, permease protein	6.4	Q93D92_STRMU	PsaB	6.4	Q54Q22_DICDI	Hypothetical protein	6.4									F
CD148451	Q5BSC9_SCHJA	SJCHGC05010 protein (Fragment)	0.037	Q8T5G5_SCHJA	Polyprotein	0.048	Q5BT13_SCHJA	SJCHGC03000 protein (Fragment)	0.048	Q8MWP9_SCHJA	Polyprotein (Fragment)	0.048	Q8MWP8_SCHJA	Polyprotein (Fragment)	0.048			F
CONTIG8929	Q4QQE8_SCHMA	Endonuclease-reverse transcriptase	7.00E-29	Q30KX0_SCHMA	Reverse transcriptase SR3-left (Fragment)	3.00E-10	Q30KW9_SCHMA	Reverse transcriptase SR3-right (Fragment)	8.00E-09	Q5BT30_SCHJA	SJCHGC02932 protein (Fragment)	4.00E-07	Q5BSV8_SCHJA	SJCHGC03153 protein	5.00E-07			F
CD062490																		F
CD095281	Q4XRS9_PLACH	Hypothetical protein (Fragment)	2	Q3PRG7_NITHA	HWE histidine kinase	4.5	Q7PDS8_PLAYO	TPR domain, putative	4.5	Q60UK1_CAEBR	Hypothetical protein CBG19953	7.7						F
CONTIG12227	Q4SW01_TETNG	Chromosome undetermined SCAF13700, whole genome shotgun sequence	1.4	Q5BJ37_XENLA	Hypothetical protein	3.2	Q8N9K4_HUMAN	Hypothetical protein FLJ36998	3.2	AP2A1_MOUSE	Adapter-related protein complex 2 alpha 1 subunit (Alpha-adaptin A) (Adaptor pro	3.2	AP2A1_HUMAN	Adapter-related protein complex 2 alpha 1 subunit (Alpha-adaptin A) (Adaptor pro	3.2			F
CONTIG5225	Q5C1Q4_SCHJA	SJCHGC09195 protein (Fragment)	0.022	Q587L5_ONCKE	Peroxisome proliferator-activated receptor gamma	0.11	Q5CHK1_CRYHO	Asparagine-rich protein	0.11	Q90WV0_PETMA	Homeobox protein hox4x (Fragment)	0.18	LOLA4_DROME	Longitudinals lacking protein, isoforms F/I/K/R/T	0.24			F
CD184227																		F
Contig5665		UNKNOWN 3348	OM0023349-AOP															F
SMU66335		SCHISTOSOMA MANSONI SR1 NON-LTR RETROTRANSPOSON, INTERNAL FRAGMENT H1, POL PSEUD	OM0023337-AOP															F
CD201737	Q4QQE9_SCHMA	Endonuclease-reverse transcriptase	0.048	Q4ANX4_9CHLB	Menaquinone biosynthesis protein	10												F
CONTIG6437																		F
Contig2501		UNKNOWN 1346	OM0023340-AOP															F
CONTIG13162	Q86E81_SCHJA	Clone ZZD837 mRNA sequence	2.00E-51	Q5BYI8_SCHJA	SJCHGC05244 protein (Fragment)	2.00E-51	Q5A770_CANAL	Hypothetical protein	0.13	Q6TEP7_BRARE	Nuclear factor-like 1	0.65	Q54C04_DICDI	Hypothetical protein	0.65			F
CONTIG4470	Q7QI76_ANOGA	ENSANGP00000017198	8.7															F
>CL314																		F
>CL1108																		F
SMLC1C06																		F
CD183859																		F
CD171047	Q8T5G5_SCHJA	Polyprotein	8.00E-13	Q8MWP9_SCHJA	Polyprotein (Fragment)	8.00E-13	Q5DBA5_SCHJA	SJCHGC09144 protein	2.00E-12	Q3MJS9_SCHJA	SJCHGC06446 protein (Fragment)	7.00E-06	Q5BSC9_SCHJA	SJCHGC05010 protein (Fragment)	0.18			F
CONTIG8196	Q4QQE8_SCHMA	Endonuclease-reverse transcriptase	3.00E-25	Q5C0M3_SCHJA	SJCHGC02939 protein (Fragment)	4.00E-24	Q5C264_SCHJA	SJCHGC06886 protein (Fragment)	4.00E-09	Q5BSY2_SCHJA	SJCHGC03063 protein	3.00E-04	Q5BSY8_SCHJA	SJCHGC03051 protein	0.002			F
CD067089																		F
CONTIG5643	O73634_XENLA	Neural cell adhesion molecule	3.00E-08	NCA12_XENLA	Neural cell adhesion molecule 1-B precursor	4.00E-08	O73633_XENLA	Neural cell adhesion molecule	5.00E-07	Q66IV0_XENLA	Hypothetical protein	6.00E-07	NCA11_XENLA	Neural cell adhesion molecule 1-A precursor	6.00E-07			F
Contig3816		UNKNOWN 2449	OM0023370-AOP															F
SCMRRNAE		SCHISTOSOMA MANSONI RIBOSOMAL RNA	OM0023390-AOP															F
CD152068																		F
CD148396	Q7QBE4_ANOGA	ENSANGP00000014764 (Fragment)	6.00E-08	Q7PUS2_ANOGA	ENSANGP00000018326 (Fragment)	3.00E-06	Q4WBW0_ASPFU	Hypothetical protein	0.001	Q7PGV2_ANOGA	ENSANGP00000022461 (Fragment)	0.003	Q7PGV1_ANOGA	ENSANGP00000022354 (Fragment)	0.003			F
CD167228	ARL6_PONPY	ADP-ribosylation factor-like protein 6	2.00E-04	ARL6_HUMAN	ADP-ribosylation factor-like protein 6	3.00E-04	Q8VCV3_MOUSE	Arl6 protein	5.00E-04	Q3U6U3_MOUSE	Bone marrow macrophage cDNA, RIKEN full-length enriched library, clone:I830097J0	5.00E-04	Q3TY77_MOUSE	Visual cortex cDNA, RIKEN full-length enriched library, clone:K430340K12 product	5.00E-04			F
>CL1267																		F
Contig2441		UNKNOWN 1289	OM0023340-AOP															F
SMLA42C10	Q8M6K6_TAESO	NADH dehydrogenase subunit 6	0.54	Q33565_9TRYP	CR3 protein	1.6	Q38FC7_9TRYP	Hypothetical protein	2.1	Q90WI3_BRARE	Prominin-like 2	2.7	Q6ZWI3_HUMAN	Hypothetical protein FLJ41036	6			F
CONTIG10422	Q72K06_THET2	Maltose transport system permease protein malG	2.6	Q5SJN2_THET8	Sugar ABC transporter, permease protein	2.6	Q6LQ52_PHOPR	Hypothetical protein	5.9									F
Contig3304		UNKNOWN 2005	OM0023396-AOP															F
CD167111	Q885L5_PSESM	Aromatic amino acid permease	7.5	O87159_VIBCH	WblC protein	9.9	O31261_ANASP	Guanine nucleotide-binding protein beta subunit-like protein	9.9									F
CD111553	Q39VT4_GEOME	ABC-2	7.5	Q34191_CRION	NADH dehydrogenase subunit 4	7.5	Q6CB32_YARLI	Similarity	7.5									F
CD157573	Q8I3B5_PLAF7	Hypothetical protein PFI0160w	5.8															F
CD077988	Q61F10_CAEBR	Hypothetical protein CBG11841	5.8	Q9N4Q8_CAEEL	Hypothetical protein	7.5	Q6CH22_YARLI	Similarities with sp|P53292 Saccharomyces cerevisiae YGR165w	9.8									F
CF500699	Q5BSA3_SCHJA	SJCHGC05284 protein	2.00E-05	Q8MWP8_SCHJA	Polyprotein (Fragment)	1.00E-04	Q8T5G5_SCHJA	Polyprotein	4.00E-04	Q8MWP9_SCHJA	Polyprotein (Fragment)	4.00E-04	Q3MJT3_SCHJA	SJCHGC05140 protein	5.00E-04			F
CD198373	Q5AK44_CANAL	Hypothetical protein	2.6															F
CD066451	Q98529_PBCV1	A479R protein	0.88	Q38ES7_9TRYP	Hypothetical protein	5.7	Q9VQN2_DROME	CG3347-PA	9.8	Q4V587_DROME	IP13916p	9.8						F
CONTIG3572	Q3TMY8_MOUSE	RCB-0464 Meth-A cDNA, RIKEN full-length enriched library, clone:G430077N09 produ	2	Q8F3C9_LEPIN	Hypothetical protein	2.6	Q72SA2_LEPIC	Hypothetical protein	2.6	Q5F3X4_CHICK	Hypothetical protein	3.4	Q543F1_MOUSE	13 days embryo heart cDNA, RIKEN full-length enriched library, clone:D330012L15	3.4			F
CONTIG8058	Q5DB70_SCHJA	SJCHGC05631 protein	8.00E-04	Q19307_CAEEL	Hypothetical protein F10E7.2	0.37	Q9HFL6_MUCCI	CigB protein	1.1	Q3MFZ4_ANAVA	Inner-membrane translocator	5.4	Q4YT68_PLABE	Hypothetical protein	5.4			F
CD135830																		F
CONTIG2842	Q3UVC6_MOUSE	16 days neonate cerebellum cDNA, RIKEN full-length enriched library, clone:9630	7.00E-99	SMAD9_MOUSE	Mothers against decapentaplegic homolog 9 (SMAD 9) (Mothers against DPP homolog	7.00E-99	SMAD9_RAT	Mothers against decapentaplegic homolog 9 (SMAD 9) (Mothers against DPP homolog	7.00E-97	Q8T6S2_HYDAT	Smad1	3.00E-91	Q8AY15_BRARE	Smad3a	3.00E-88			F
SMLA48G06	Q6YQ78_ONYPE	Hypothetical protein	7.5															F
CD076356																		F
CONTIG9425	Q5ZXT8_LEGPH	Ribonuclease BN	3.5	Q5WYQ6_LEGPL	Hypothetical protein	3.5	Q3Q102_9GAMM	NLP/P60 precursor	4.5	Q2ZSU3_SHEPU	NLP/P60 precursor	7.7						F
CONTIG7968	Q8IIW4_PLAF7	Hypothetical protein	0.026	Q54VV9_DICDI	Hypothetical protein	0.075	Q54E43_DICDI	Hypothetical protein	0.22	Q54SP4_DICDI	Histidine kinase	0.28	Q25769_PLAFA	Asparagine-rich antigen (clone 17C1) (Fragment)	0.83			F
CD093874	Q30KX0_SCHMA	Reverse transcriptase SR3-left (Fragment)	4.00E-22	Q30KW9_SCHMA	Reverse transcriptase SR3-right (Fragment)	9.00E-22	Q4QQE8_SCHMA	Endonuclease-reverse transcriptase	1.00E-21	Q5D952_SCHJA	SJCHGC04954 protein	2.00E-09	Q5BSE4_SCHJA	SJCHGC04778 protein (Fragment)	5.00E-09			F
CONTIG8041	Q6SPE9_RABIT	Atherin	2.00E-08	Q6SPF0_HUMAN	Atherin	2.00E-08	Q4SE15_TETNG	Chromosome 3 SCAF14626, whole genome shotgun sequence	4.00E-08	Q9W1A9_DROME	CG11290-PA	0.002	Q6J514_BRARE	Monocytic leukemia zinc finger protein	0.049			F
CD089233	Q96UA9_NEUCR	Hypothetical protein 9G6.050	0.41	Q33RH0_9GAMM	Thymidine phosphorylase (EC 2.4.2.4)	10												F
CD166893	Q4QQE8_SCHMA	Endonuclease-reverse transcriptase	2.00E-06	Q5C0M3_SCHJA	SJCHGC02939 protein (Fragment)	3.00E-05												F
CD069459	O42113_BRARE	F-spondin1	3.00E-16	Q4SPB7_TETNG	Chromosome undetermined SCAF14539, whole genome shotgun sequence. (Fragment)	5.00E-16	SPON1_RAT	Spondin-1 precursor (F-spondin)	6.00E-16	Q4S0W9_TETNG	Chromosome 5 SCAF14773, whole genome shotgun sequence	8.00E-16	SPON1_CHICK	Spondin-1 precursor (F-spondin)	8.00E-16			F
CD117558	Q4QQD7_SCHMA	Reverse transcriptase	1.00E-17	Q4SXU0_TETNG	Chromosome undetermined SCAF12330, whole genome shotgun sequence	0.002	Q90Z50_FUGRU	Putative reverse transcriptase	0.34	Q7RTK8_SCHMA	Reverse transcriptase	3.7	CDC27_YEAST	Anaphase promoting complex subunit CDC27 (Cell division control protein 27) (Ana	4.9			F
>CL1290	Q50Y91_ENTHI	Hypothetical protein	7.7															F
CONTIG10838	Q4UJH3_RICFE	Hypothetical protein	1.5	Q44Q35_CHLLI	4Fe-4S ferredoxin, iron-sulfur binding:Polysulphide reductase, NrfD	4.3	Q8A9W3_BACTN	Chloramphenicol acetyltransferase (CAT-III)	7.4	Q4RIJ1_TETNG	Chromosome 11 SCAF15043, whole genome shotgun sequence. (Fragment)	9.6	Q63I59_BURPS	Putative ATP-dependent DNA ligase	9.6			F
Contig6895		UNKNOWN 4313	OM0023381-AOP															F
CONTIG2212	Q5DGP9_SCHJA	SJCHGC08973 protein	4.00E-70	Q86EZ0_SCHJA	Clone ZZD128 mRNA sequence	8.00E-39	Q5DG09_SCHJA	SJCHGC06310 protein	4.00E-28	Q6PHH2_BRARE	Wu:fd05a10 protein (Fragment)	4.00E-22	Q5U4W9_XENLA	LOC495415 protein	1.00E-21			F
CONTIG6251	Q60WV2_CAEBR	Hypothetical protein CBG18975	1.00E-18	Q95X28_CAEEL	Hypothetical protein	5.00E-17	O76448_CAEEL	Hypothetical protein	5.00E-17	Q60WV1_CAEBR	Hypothetical protein CBG18976	1.00E-15	O76449_CAEEL	Hypothetical protein	8.00E-15			F
CD202013	Q4QQE8_SCHMA	Endonuclease-reverse transcriptase	6.00E-08	Q5BSV8_SCHJA	SJCHGC03153 protein	1.00E-07	Q4YQ19_PLABE	Hypothetical protein	0.31	Q7RDF3_PLAYO	Hypothetical protein	5.8	Q7RA78_PLAYO	IQ calmodulin-binding motif, putative (Fragment)	5.8			F
>CL1070																		F
CONTIG11905	Q5BSA3_SCHJA	SJCHGC05284 protein	1.00E-09	Q8MWP8_SCHJA	Polyprotein (Fragment)	2.00E-09	Q8T5G5_SCHJA	Polyprotein	6.00E-09	Q3MJT3_SCHJA	SJCHGC05140 protein	6.00E-09	Q8MWP9_SCHJA	Polyprotein (Fragment)	6.00E-09			F
CONTIG7478	Q5C136_SCHJA	SJCHGC07168 protein (Fragment)	1.00E-04	Q8IC24_PLAF7	Hypothetical protein MAL7P1.19	7.7												F
CD088205																		F
CD094441	Q4QQE2_SCHMA	Endonuclease-reverse transcriptase	3.00E-05	C82A1_PEA	Cytochrome P450 82A1 (EC 1.14.-.-) (CYPLXXXII) (Fragment)	5.5												F
CD141440																		F
CONTIG3934	Q973X0_SULTO	Hypothetical protein ST0778	4.9	Q4YA17_PLABE	Pb-fam-2 protein (Fragment)	8.4	Q4Y6B1_PLACH	Hypothetical protein	8.4									F
CD085796	Q3BKI1_9PROT	Hypothetical protein	4.00E-04															F
CONTIG2609	Q5C227_SCHJA	SJCHGC04963 protein (Fragment)	3.00E-51	Q5EE00_SCHJA	Serine/threonine specific protein phosphatase (EC 3.1.3.16)	3.00E-51	Q7PR35_ANOGA	ENSANGP00000018205 (Fragment)	3.00E-41	Q5ZIV0_CHICK	Hypothetical protein	1.00E-40	Q7ZUS7_BRARE	Protein phosphatase 6, catalytic subunit	2.00E-40			F
CONTIG5644	Q3EKX2_BACTI	Export ABC transporter permease protein	1.5	Q4MUJ4_BACCE	Export ABC transporter permease protein	3.3	Q63D13_BACCZ	Multidrug ABC transporter, permease	4.3	Q6HKF3_BACHK	Multidrug ABC transporter, permease	5.6	Q5BX87_SCHJA	SJCHGC05935 protein (Fragment)	9.5			F
CD060913	Q8AEG1_9HIV1	Vif protein	7.9	Q6AKZ6_DESPS	Hypothetical protein	7.9												F
CD181717																		F
CD163844	Q5DEY9_SCHJA	SJCHGC02887 protein	1.00E-09	Q4QQE8_SCHMA	Endonuclease-reverse transcriptase	2.00E-09	Q30KX0_SCHMA	Reverse transcriptase SR3-left (Fragment)	3.00E-09	Q30KW9_SCHMA	Reverse transcriptase SR3-right (Fragment)	3.00E-09	Q5BSE4_SCHJA	SJCHGC04778 protein (Fragment)	2.00E-06			F
CD126790																		F
CD182962	Q5CN56_CRYHO	Similar to protein MGC10084	2	Q64YT8_BACFR	Hypothetical protein	5.8	Q5LHT6_BACFN	Hypothetical protein	5.8	Q4RV37_TETNG	Chromosome 15 SCAF14992, whole genome shotgun sequence. (Fragment)	7.6	Q8IL17_PLAF7	Hypothetical protein	9.9			F
CONTIG1440	Q7Q1Y4_ANOGA	ENSANGP00000021001 (Fragment)	9.00E-06	Q8AW17_BRARE	Collagen type XI alpha 2 (Fragment)	4.00E-05	Q66NW3_CIOIN	Col5a1 (Fragment)	2.00E-04	Q59EE7_HUMAN	Pro-alpha-1 type V collagen variant (Fragment)	2.00E-04	Q5SY12_HUMAN	Collagen, type V, alpha 1 (Fragment)	2.00E-04			F
Contig6622		UNKNOWN 4085	OM0023344-AOP															F
Contig5074		UNKNOWN 2935	OM0023358-AOP															F
CD194318	Q86E31_SCHJA	Clone ZZZ288 mRNA sequence	2.00E-05	Q3B7M5_BOVIN	MGC128762 protein	2.6	Q7Q5B9_ANOGA	ENSANGP00000010001 (Fragment)	9.8									F
CD201675																		F
CD162022	Q8K1Z6_MOUSE	G protein-coupled receptor 18 (Activated spleen cDNA, RIKEN full-length enriched	5.9	Q3T9N3_MOUSE	Activated spleen cDNA, RIKEN full-length enriched library, clone:F830206E07 prod	5.9	Q51FC4_ENTHI	Hypothetical protein	5.9	Q54VT6_DICDI	Bifunctional UMP-synthetase	7.7	Q60QI9_CAEBR	Hypothetical protein CBG21804 (Fragment)	7.7			F
CD120641	Q8I0U9_PLAF7	Phosphoenolpyruvate/phosphate translocator, putative	3.4															F
Contig1788		UNKNOWN 835	OM0023327-AOP															F
CD201777	Q8T5G5_SCHJA	Polyprotein	1.00E-12	Q8MWP9_SCHJA	Polyprotein (Fragment)	1.00E-12	Q5BT13_SCHJA	SJCHGC03000 protein (Fragment)	6.00E-11	Q8MWP8_SCHJA	Polyprotein (Fragment)	2.00E-06	Q3MJT3_SCHJA	SJCHGC05140 protein	7.00E-06			F
CD198116	Q61U96_CAEBR	Hypothetical protein CBG05415 (Fragment)	2.6	Q4UIV5_THEAN	Hypothetical protein	5.9												F
CD165224	Q4Z052_PLABE	Hypothetical protein (Fragment)	9.9															F
CD167332	Q371X5_RHOPA	A/G-specific adenine glycosylase MutY	7.7															F
CONTIG7019	REST_CHICK	Restin (Cytoplasmic linker protein 170) (CLIP-170)	0.14	Q5CFF0_CRYHO	Hypothetical protein	0.31	Q5CQP5_CRYPV	Hypothetical protein	0.31	Q4YNB5_PLABE	Hypothetical protein (Fragment)	2.6	Q5CYU1_CRYPV	Very large low complexity possible apicomplexan protein with 2 possible EF hand	2.6			F
CF500921	Q4QQE8_SCHMA	Endonuclease-reverse transcriptase	9.00E-17	Q30KW9_SCHMA	Reverse transcriptase SR3-right (Fragment)	1.00E-15	Q5DEY9_SCHJA	SJCHGC02887 protein	2.00E-15	Q30KX0_SCHMA	Reverse transcriptase SR3-left (Fragment)	6.00E-15	Q3KTE0_SCHJA	SJCHGC09723 protein	1.00E-10			F
SMLA18H08																		F
SMLA2B01	Q8IEH5_PLAF7	Hypothetical protein MAL13P1.70	10	Q6PJ70_HUMAN	OSBPL6 protein (Fragment)	10												F
CD186745	Q8AV69_XENLA	Receptor tyrosine kinase Xror2	2.00E-10	Q5FVA5_XENTR	MGC97773 protein	4.00E-10	ROR2_MOUSE	Tyrosine-protein kinase transmembrane receptor ROR2 precursor (EC 2.7.1.112) (Ne	5.00E-10	Q8C3W2_MOUSE	13 days embryo heart cDNA, RIKEN full-length enriched library, clone:D330038N11	6.00E-10	Q8BSP6_MOUSE	13 days embryo forelimb cDNA, RIKEN full-length enriched library, clone:5930405P	6.00E-10			F
CD194379	Q9LTH2_ARATH	UDP-glycose:flavonoid glycosyltransferase-like (Putative glucuronosyl transferas	5.9															F
CD143061	Q3I5Q4_SPOEX	Chitin synthase A	3.4															F
SMLC33E06A	Q6VBJ3_CANGA	Epa4p	0.002	Q6VBJ4_CANGA	Epa5p	0.009	Q86B18_DICDI	Similar to Suppressor of mutant AC40 subunit of RNA polymerase I and III (High s	0.015	Q97NZ1_STRPN	Transcriptional regulator, TetR family	0.032	Q8DNK2_STRR6	Hypothetical protein spr1673	0.032			F
CD135260	Q4XVP2_PLACH	Hypothetical protein	1.5	Q7RAS7_PLAYO	Hypothetical protein	3.4	Q6BT07_DEBHA	Debaryomyces hansenii chromosome D of strain CBS767 of Debaryomyces hansenii	4.5	Q5NIH5_FRATT	Hypothetical protein	7.6	Q5VS64_ORYSA	Hypothetical protein P0644B06.38	7.6			F
CONTIG2183	CDO_SCHJA	Cysteine dioxygenase (EC 1.13.11.20) (CDO)	6.00E-31	CDO1_BRARE	Cysteine dioxygenase type I (EC 1.13.11.20) (CDO) (CDO-I)	9.00E-17	Q6P896_XENTR	Hypothetical protein MGC75851	3.00E-16	Q6PA86_XENLA	MGC68656 protein	3.00E-16	Q6GR41_XENLA	MGC81086 protein	3.00E-16			F
CD133730	CR13_ORYSA	13 kDa cold-induced protein	9.8															F
Contig3882		UNKNOWN 2487 POSSIBLE ANTISENSE	OM0023399-AOP															F
SMLC30C08	P40_SCHMA	Major egg antigen (p40)	1.00E-66	Q5DE66_SCHJA	SJCHGC06324 protein	1.00E-51	Q86E35_SCHJA	Clone ZZZ262 mRNA sequence	2.00E-51	Q5DFS8_SCHJA	SJCHGC09367 protein	5.00E-40	Q5C0J7_SCHJA	SJCHGC05661 protein (Fragment)	1.00E-37			F
CD131326																		F
>CL92	Q660I6_BORGA	Carotenoid biosynthesis protein, putative	7.7															F
CD171404	O23588_ARATH	Retrotransposon like protein	0.53	Q4WLI3_ASPFU	Endosomal integral membrane protein, putative	3.4	Q5B1Y0_EMENI	Hypothetical protein	4.4	Q6MDE8_PARUW	Putative DNA repair protein RecN	9.9						F
CD130840																		F
SMLC48A01	Q6INV8_XENLA	MGC80211 protein	2.3	Q8UYD6_9VIRU	Non-structural protein	6.8	POLN_HEVPA	Non-structural polyprotein (EC 2.7.7.48) (RNA-directed RNA polymerase/Helicase)	6.8									F
CONTIG5339	VWF_HUMAN	Von Willebrand factor precursor (vWF) [Contains: Von Willebrand antigen II]	9.8															F
CD116532																		F
CONTIG10167	Q5DDP1_SCHJA	Hypothetical protein	1.00E-12	Q5DCJ3_SCHJA	SJCHGC01158 protein	4.00E-09	Q54MU3_DICDI	Hypothetical protein	0.035	O97291_PLAF7	Hypothetical protein MAL3P7.21	0.046	Q8DSV6_STRMU	Putative D-3-phosphoglycerate dehydrogenase (EC 1.1.1.95)	1.1			F
CONTIG7233	Q4SSG3_TETNG	Chromosome undetermined SCAF14443, whole genome shotgun sequence. (Fragment)	1.00E-49	Q4RQA7_TETNG	Chromosome 17 SCAF15006, whole genome shotgun sequence. (Fragment)	2.00E-49	Q4PLL5_MOUSE	Microtubule-actin crosslinking factor 1b	2.00E-49	Q80TZ5_MOUSE	MKIAA0465 protein (Fragment)	2.00E-49	MACF1_MOUSE	Microtubule-actin crosslinking factor 1 (Actin cross-linking family 7)	2.00E-49			F
CD179889	Q4HKE1_CAMLA	[NiFe] hydrogenase maturation protein HypF	0.028	Q61KB2_CAEBR	Hypothetical protein CBG09447	0.14	Q3CRQ5_ALTAT	TonB-dependent receptor precursor	0.69	Q3M3X3_ANAVA	Serine/Threonine protein kinase and Signal Transduction Histidine Kinase (STHK)	1.2	Q54YG0_DICDI	Hypothetical protein	1.2			F
>CL1090	Q4QQE8_SCHMA	Endonuclease-reverse transcriptase	7.00E-31	Q5C264_SCHJA	SJCHGC06886 protein (Fragment)	4.00E-17	Q5C0M3_SCHJA	SJCHGC02939 protein (Fragment)	1.00E-16	Q5BSY8_SCHJA	SJCHGC03051 protein	3.00E-09	Q5BSY2_SCHJA	SJCHGC03063 protein	2.00E-04			F
CD124030	Q65WE8_MANSM	Hypothetical protein	1.00E-07	Q5ZQY8_9CAUD	Hypothetical protein	3.00E-07	Q6D0T3_ERWCT	Putative phage-related exported protein	6.00E-07	Q6D3G7_ERWCT	Putative exported protein	8.00E-07	Q8ZKI9_SALTY	Putative inner membrane protein	1.00E-06			F
CD069370	Q54KN8_DICDI	Hypothetical protein	0.027	Q6GMA5_XENLA	LOC397736 protein	1.2	AMD2_XENLA	Peptidyl-glycine alpha-amidating monooxygenase II precursor (EC 1.14.17.3) (Pept	1.2	Q9FDY7_BRANA	Endopolygalacturonase	1.5	HSV2_SCHPO	SVP1-like protein 2	1.5			F
CONTIG3453	Q5C209_SCHJA	SJCHGC03089 protein (Fragment)	4.00E-42	Q5C287_SCHJA	SJCHGC03048 protein (Fragment)	1.00E-26	Q4QQF6_SCHMA	Gag-pol polyprotein (Fragment)	9.00E-19	Q5C295_SCHJA	SJCHGC02649 protein (Fragment)	4.00E-18	Q4QQF5_SCHMA	Gag-pol polyprotein	4.00E-17			F
CONTIG1373	Q6S8B5_SCHMA	Actin-binding/filamin-like protein (Fragment)	3.00E-54	Q95LH5_BOVIN	Filamin-1 (Fragment)	8.00E-44	Q5HY55_HUMAN	Filamin A, alpha (Actin binding protein 280)	5.00E-43	Q5HY54_HUMAN	Filamin A, alpha (Actin binding protein 280)	5.00E-43	Q5HY53_HUMAN	Filamin A, alpha (Actin binding protein 280)	5.00E-43			F
CD162395	Q5C1J1_SCHJA	SJCHGC09151 protein (Fragment)	2.2	Q4RJA8_TETNG	Chromosome 18 SCAF15038, whole genome shotgun sequence	8.4	Q5A2K1_CANAL	Hypothetical protein	8.4									F
CONTIG7704																		F
Contig5150		UNKNOWN 3004	OM0023356-AOP															F
CD189188	Q4Z7D3_PLABE	Hypothetical protein (Fragment)	4.5															F
Contig456		SIMILAR TO AP ENDONUCLEASE XTH2 (APURINIC/APYRIMIDINIC ENDONUCLEASE 2) 2E-12 POS	OM0023354-AOP															F
CONTIG1782	Q5DG62_SCHJA	SJCHGC05870 protein	6.00E-37	Q7PX88_ANOGA	ENSANGP00000013876 (Fragment)	1.00E-21	Q9VB51_DROME	CG5934-PA (RH57268p)	6.00E-21	Q4T369_TETNG	Chromosome undetermined SCAF10117, whole genome shotgun sequence	1.00E-20	Q3TJC8_MOUSE	15 days pregnant adult female placenta cDNA, RIKEN full-length enriched library,	1.00E-20			F
SMLA50E03	Q86FE5_SCHJA	Clone ZZD1477 mRNA sequence	1.00E-08	Q5DF22_SCHJA	SJCHGC04269 protein	3	Q8IK84_PLAF7	Hypothetical protein	6.8									F
CD122132	Q3A8V0_CARHY	ISChy3, transposase	0.53	Q4BHV7_BURVI	Amidase	2.6	Q3CK75_THEET	Integrase, catalytic region	4.5	Q3CK50_THEET	Integrase, catalytic region	4.5	Q3CJ11_THEET	Integrase, catalytic region	4.5			F
CD163751	Q8T5G5_SCHJA	Polyprotein	0.3	Q8MWP9_SCHJA	Polyprotein (Fragment)	0.3	Q5C394_SCHJA	SJCHGC09145 protein (Fragment)	4.4									F
CD077866																		F
CD181507																		F
CD069995	Q89VW3_BRAJA	Multidrug resistance protein A	5.9															F
CONTIG5929	Q5BSA3_SCHJA	SJCHGC05284 protein	2.00E-04	Q8T5G5_SCHJA	Polyprotein	4.00E-04	Q8MWP9_SCHJA	Polyprotein (Fragment)	4.00E-04	Q8MWP8_SCHJA	Polyprotein (Fragment)	4.00E-04	Q3MJT3_SCHJA	SJCHGC05140 protein	7.00E-04			F
CD064933	Q7QNL9_ANOGA	ENSANGP00000014573 (Fragment)	1.5	Q4QQF4_SCHMA	Gag-pol polyprotein	2	Q5D9J7_SCHJA	SJCHGC07189 protein	2.6	Q5KTM2_BOMMO	Reverse transcriptase	9.8						F
CD059774																		F
CONTIG6413	Q54IX7_DICDI	Hypothetical protein	3.4	Q3K8P5_PSEFL	D-galactonate transporter	7.5	O96170_PLAF7	Hypothetical protein PFB0375w	9.8	Q5DE92_SCHJA	SJCHGC05177 protein	9.8						F
CONTIG11198	Q4QQD4_SCHMA	Pol polyprotein	8.00E-47	Q5C1P1_SCHJA	SJCHGC05322 protein (Fragment)	6.00E-42	Q6IFU3_SCHMA	Pol polyprotein (Fragment)	8.00E-29	Q68NI0_SCHMA	Polyprotein (Fragment)	8.00E-29	Q6IFT8_SCHMA	Pol polyprotein	1.00E-28			F
CD178702																		F
CD116846	Q54QG7_DICDI	Hypothetical protein	5.9	Q8IM41_PLAF7	Hypothetical protein	7.7												F
CD191586	Q3X2P0_9ACTN	Hypothetical protein	4.5	Q5WAW2_BACSK	Major facilitator (MFS) superfamily protein	7.6	Q9SEA2_GUITH	Putative helicase-like protein	7.6	DPOL_METJA	DNA polymerase (EC 2.7.7.7) [Contains: Mja pol-1 intein; Mja pol-2 intein]	7.6	Q3GPS5_9GAMM	Hypothetical protein	10			F
CONTIG1650	Q5C1V2_SCHJA	SJCHGC06820 protein (Fragment)	2.00E-36	Q6NTN5_XENLA	MGC83161 protein	8.00E-07	Q9VGH9_DROME	CG6939-PA, isoform A	5.00E-06	Q960A9_DROME	SD10541p	5.00E-06	Q7KSP6_DROME	CG6939-PB, isoform B	5.00E-06			F
CD087451																		F
CONTIG10226																		F
AF036742		SCHISTOSOMA MANSONI CLONE SM5 SATELLITE SEQUENCE	OM0023326-AOP															F
CD096910	Q4QQD7_SCHMA	Reverse transcriptase	5.00E-17	Q4SXU0_TETNG	Chromosome undetermined SCAF12330, whole genome shotgun sequence	0.005	Q4KTA7_FUGRU	Telomerase reverse transcriptase	0.014	Q90Z50_FUGRU	Putative reverse transcriptase	0.054	Q8VVS1_STAAU	ORF24	0.12			F
CD067208																		F
CD068500	Q4QQE8_SCHMA	Endonuclease-reverse transcriptase	2.00E-12	Q30KX0_SCHMA	Reverse transcriptase SR3-left (Fragment)	3.00E-12	Q30KW9_SCHMA	Reverse transcriptase SR3-right (Fragment)	9.00E-12	Q5DEY9_SCHJA	SJCHGC02887 protein	0.003	Q5BT18_SCHJA	SJCHGC02983 protein	0.012			F
CD195288	Q4QQD7_SCHMA	Reverse transcriptase	3.00E-07	Q5DZC4_VIBF1	Chemotaxis protein CheV (EC 2.7.3.-)	2.5	Q5ZQE9_9COLE	Cytochrome oxidase subunit III (Fragment)	5.5	Q6FVU3_CANGA	Candida glabrata strain CBS138 chromosome D complete sequence	7.2						F
CONTIG5518	Q6CKA9_KLULA	Similar to sgd|S0004237 Saccharomyces cerevisiae YLR247c	1.5	Q5B9Z0_EMENI	Hypothetical protein	7.6	Q7PC42_PSEU2	Putative type III effector HolPtoACPsy (Type III effector HopAC1)	9.9									F
CONTIG4523	Q2ZID6_CALSA	Oligopeptide/dipeptide ABC transporter, ATP-binding protein, C-terminal	3.4															F
CD131723	O96110_PLAF7	Erythrocyte membrane protein 1 (PfEMP1), truncated	2	Q8C4E5_MOUSE	0 day neonate cerebellum cDNA, RIKEN full-length enriched library, clone:C230050	3.4	Q706Y5_STAAU	AgrC protein (Fragment)	4.5	Q4SJR4_TETNG	Chromosome 1 SCAF14573, whole genome shotgun sequence. (Fragment)	5.9						F
CD182222																		F
CD158901																		F
CD190506																		F
CD163066	Q61DQ8_CAEBR	Hypothetical protein CBG12386	0.003	Q8LRM7_CHLRE	Mastigoneme-like protein	0.006	Q9VM55_DROME	CG9138-PA	0.006	Q4S0R8_TETNG	Chromosome undetermined SCAF14779, whole genome shotgun sequence. (Fragment)	0.014	Q68FG9_MOUSE	Scube3 protein (Fragment)	0.014			F
CONTIG3537																		F
CD088639																		F
CONTIG8935	Q81LY7_BACAN	Hypothetical protein	5.9	Q30TX1_9HELI	TonB-dependent receptor	5.9												F
CONTIG1617	Q9IV42_9CALI	Capsid protein	2.6	Q6BW94_DEBHA	Debaryomyces hansenii chromosome B of strain CBS767 of Debaryomyces hansenii	2.6	YFIF_BACSU	Putative HTH-type transcriptional regulator yfiF	2.6	Q4S8U5_TETNG	Chromosome 7 SCAF14703, whole genome shotgun sequence. (Fragment)	3.4	Q8F337_LEPIN	Methyl-accepting chemotaxis protein tlpA	7.6			F
CONTIG8180	Q5WV45_LEGPL	Hypothetical protein	0.63	Q6FJL5_CANGA	Similar to sp|P29366 Saccharomyces cerevisiae YBR200w BEM1 bud emergence mediato	3.1	Q8IQ18_DROME	CG33196-PB	6.9	Q5AIA4_CANAL	Hypothetical protein IML1	6.9	Q6BN00_DEBHA	Similar to CA4182|IPF19797 Candida albicans IPF19797	6.9			F
CD071767	Q812R0_BACCR	Hypothetical Membrane Spanning Protein	2.2	Q8RL14_PRORE	TraD	8.4	Q8KQY2_VIBCH	Conjugative coupling factor	8.4									F
CD084467	Q51G60_ENTHI	Hypothetical protein	1.2	ROAA_ASTLO	Ribosomal operon-associated A protein (RoaA)	4.4												F
CD090802	Q3X9P5_METFL	Hypothetical protein precursor	1.00E-18	Q5DYJ6_VIBF1	Transporter, drug/metabolite exporter family	2.00E-14	Q3RRH9_9BURK	Probable transmembrane protein precursor	4.00E-14	Q3NQC7_SHEFR	Hypothetical protein	5.00E-13	Q6D4H7_ERWCT	Putative membrane protein	1.00E-12			F
CD198103																		F
CONTIG8609	Q2Y5T1_9PROT	Hypothetical protein precursor	2	Q7XJR2_ARATH	Putative Na+-dependent inorganic phosphate cotransporter	7.6												F
CONTIG12378	Q7REP0_PLAYO	Hypothetical protein	6.9															F
CF499270	Q5BSG6_SCHJA	SJCHGC04354 protein (Fragment)	0.001	Q5BSA3_SCHJA	SJCHGC05284 protein	0.004	Q3MJT3_SCHJA	SJCHGC05140 protein	0.012	Q8T5G5_SCHJA	Polyprotein	0.036	Q8MWP9_SCHJA	Polyprotein (Fragment)	0.036			F
CD112329	Q4XML3_PLACH	Delta tubulin, putative	0.81	Q8I531_PLAF7	Hypothetical protein	1.1	Q4UHJ6_THEAN	Phosphodiesterase, putative (EC 3.1.4.17)	1.4	Q54Q13_DICDI	Hypothetical protein	1.8	Q3HB63_TRIER	HEAT:PBS lyase HEAT-like repeat precursor	2.4			F
CD201235	Q87IZ8_VIBPA	Hypothetical protein VPA0457	4.4															F
SMLA36F08	Q4YPB2_PLABE	Hypothetical protein (Fragment)	1.8	Q4Y4G6_PLACH	Hypothetical protein (Fragment)	1.8	Q4UBW5_THEAN	Hypothetical protein	3.9	Q755Y7_ASHGO	AER380Cp	3.9						F
CD066558	Q4QQE8_SCHMA	Endonuclease-reverse transcriptase	4.00E-26	Q5BSV8_SCHJA	SJCHGC03153 protein	1.00E-09	Q86DF1_HETGL	Putative gland protein G23G11	2.4									F
CD178502	Q895F6_CLOTE	GufA protein	8.9															F
Contig355		SIMILAR TO NADH DEHYDROGENASE SUBUNIT 2 (3E-98) (POSSIBLE ANTISENSE)	OM0023361-AOP															F
CD077798	Q5DEC9_SCHJA	SJCHGC06356 protein	4.00E-37	Q4VRW5_9TREM	Cathepsin B1 isotype 5 precursor	8.00E-18	Q5DGQ1_SCHJA	SJCHGC02852 protein	2.00E-17	Q86FJ2_SCHJA	Clone ZZD1464 mRNA sequence	2.00E-17	Q5DCR5_SCHJA	Hypothetical protein	3.00E-17			F
CONTIG6573	Q7KTX2_DROME	CG32434-PA, isoform A (Loner ISO2)	1.00E-25	Q6U9V3_DROME	Loner ISO3	1.00E-25	Q5U159_DROME	RE02556p	1.00E-25	Q5U112_DROME	LP01489p	1.00E-25	Q9VP80_DROME	CG32434-PB, isoform B (Loner ISO1)	1.00E-25			F
CD162153	Q847P1_ASTYP	Nef attachable protein	2.00E-08	Q9P2Y3_HUMAN	Nef attachable protein	8.00E-05	Q847P2_ASTYP	Hypothetical protein (Fragment)	0.006									F
CD186839	Q4QQE8_SCHMA	Endonuclease-reverse transcriptase	1.00E-29	Q5C0M3_SCHJA	SJCHGC02939 protein (Fragment)	2.00E-26	Q8IE65_PLAF7	Hypothetical malaria antigen	0.009	Q4CZB3_TRYCR	Hypothetical protein	0.012	Q9ZN10_HELPJ	Putative	0.016			F
CD093143	Q9UW87_CANAL	MRP-like transporter	3.4	Q5A762_CANAL	Vacuolar multi-drug resistance ABC transporter	3.4	Q54Y18_DICDI	Bromodomain-containing protein	7.7									F
CD131901	Q8T5G5_SCHJA	Polyprotein	5.9	Q5BSA3_SCHJA	SJCHGC05284 protein	5.9	Q8MWP9_SCHJA	Polyprotein (Fragment)	5.9	Q8MWP8_SCHJA	Polyprotein (Fragment)	5.9						F
CD183482	O76213_SCHMA	Reverse transcriptase (Fragment)	0.092	Q30TT1_9HELI	Sulfatase	3												F
Contig6904		UNKNOWN 4319	OM0023380-AOP															F
Contig2531		UNKNOWN 1371	OM0023333-AOP	hypothetical	hypothetical													F
CD152184	Q4QQD7_SCHMA	Reverse transcriptase	0.27	Q7V2G5_PROMP	Possible alpha-ribazole-5'-P phosphatase	5.2												F
CONTIG5639	Q8T5G5_SCHJA	Polyprotein	2.6	Q5DBA5_SCHJA	SJCHGC09144 protein	2.6	Q3MJT3_SCHJA	SJCHGC05140 protein	2.6	Q5BT13_SCHJA	SJCHGC03000 protein (Fragment)	2.6	Q5BSC9_SCHJA	SJCHGC05010 protein (Fragment)	2.6			F
CF499420	Q8T5G5_SCHJA	Polyprotein	6.00E-43	Q8MWP9_SCHJA	Polyprotein (Fragment)	6.00E-43	Q5DBA5_SCHJA	SJCHGC09144 protein	1.00E-32	Q3KZB4_SCHJA	SJCHGC02980 protein (Fragment)	7.00E-28	Q5C3A3_SCHJA	SJCHGC09318 protein (Fragment)	1.00E-18			F
CD171468	Q3CER1_THEET	Ribosomal protein S13	7.5	Q5F327_CHICK	Hypothetical protein	9.8	Q7SFD0_NEUCR	Predicted protein (Hypothetical protein G17B7.160)	9.8									F
CD090945	Q4SW61_TETNG	Chromosome undetermined SCAF13689, whole genome shotgun sequence	1.6															F
SMLA34G11																		F
CD084561																		F
CD077154	Q86F98_SCHJA	Clone ZZZ377 mRNA sequence	3.00E-21	Q86E59_SCHJA	Clone ZZD99 mRNA sequence	3.00E-21	Q551X6_DICDI	Hypothetical protein	4.4									F
CD188260	Q7YVC3_9TRYP	Hypothetical protein	2.6															F
SMLC15G12	Q4R9S2_TETNG	Chromosome undetermined SCAF25420, whole genome shotgun sequence. (Fragment)	0.61	Q8MSD2_DROME	LD04179p (Fragment)	0.8	Q6PK95_HUMAN	TOP1 protein (Fragment)	1.8	Q6NWZ5_HUMAN	TOP1 protein (Fragment)	1.8	TOP1_HUMAN	DNA topoisomerase I (EC 5.99.1.2)	1.8			F
CD069614	Q6CTB5_KLULA	Similar to sp|P50101 Saccharomyces cerevisiae YMR304w UBP15	3.1															F
CONTIG5625	Q8G7R5_BIFLO	Possible endo-1,5-alpha-L-arabinosidase	1.1	Q6D055_ERWCT	Putative exported protein	2.5	Q54DW7_DICDI	Hypothetical protein	4.2	Q3XZ94_ENTFC	Regulatory protein, LacI:Periplasmic binding protein/LacI transcriptional regula	7.2	Q3LX96_HUMAN	Serine protease inhibitor Kazal-type 5 long isoform	7.2			F
CD085827	Q4N983_THEPA	Ribosomal processing protein, putative	7.6	Q74A98_GEOSL	Sensory box histidine kinase	10	Q4YPA7_PLABE	Hypothetical protein	10									F
CD186030	Q54GL2_DICDI	Hypothetical protein	3.4															F
CONTIG13308	Q86DW4_SCHJA	Clone ZZZ484 mRNA sequence	3.00E-28	Q6IFU2_SCHMA	Pol polyprotein	2.2	Q4HEM2_CAMCO	Glycosyl transferase, group 2 family protein domain protein	3.8									F
CONTIG11743	Q5DCA5_SCHJA	SJCHGC02678 protein	1.00E-27	Q5C7T7_SCHJA	SJCHGC02677 protein (Fragment)	1.00E-06	Q5BYH9_SCHJA	SJCHGC02390 protein (Fragment)	0.007	Q5BTK4_SCHJA	SJCHGC00333 protein (Hypothetical protein)	1.2	Q4YNI7_PLABE	Hypothetical protein (Fragment)	2			F
Contig5706		SIMILAR TO PROTEASE AND REVERSE TRANSCRIPTASE-LIKE PROTEIN (2E-09)	OM0023349-AOP															F
>CL273	Q5BSA9_SCHJA	SJCHGC05208 protein	4.9															F
Contig2549		UNKNOWN 1386	OM0023333-AOP															F
CD075276	Q5DHJ7_SCHJA	SJCHGC00470 protein	1.5	Q5DHQ0_SCHJA	Hypothetical protein	1.5	Q5DAN1_SCHJA	Hypothetical protein	1.5	Q5D928_SCHJA	Hypothetical protein	1.5	Q4UMM6_RICFE	Multidrug resistance ABC transporter ATP-binding protein	3.4			F
CD091443	Q4QQE8_SCHMA	Endonuclease-reverse transcriptase	5.00E-17	Q5C0M3_SCHJA	SJCHGC02939 protein (Fragment)	2.00E-16	Q5BST9_SCHJA	SJCHGC03271 protein (Fragment)	1.00E-07	Q5BSZ5_SCHJA	SJCHGC03034 protein	0.14	Q4IEM1_GIBZE	Hypothetical protein	0.68			F
CD134959	Q87042_9RETR	Taf protein	7.6															M
Contig4225		UNKNOWN 2680	OM0023400-AOP	RIKEN cDNA 1810043M15 [Mus musculus]	RIKEN cDNA 1810043M15 [Mus musculus]													M
CD076044	Q7P568_FUSNV	Hypothetical protein	0.52	Q8I3T3_PLAF7	Hypothetical protein PFE0875c	1.5	Q97FZ0_CLOAB	Protein containing ChW-repeats	5.7	Q6YQS2_ONYPE	Hypothetical protein	9.8	Q8IL44_PLAF7	Hypothetical protein	9.8			M
SMLA63C11	Q5ASM3_EMENI	Hypothetical protein	6.00E-24	FUMH_SCHPO	Fumarate hydratase, mitochondrial precursor (EC 4.2.1.2) (Fumarase)	7.00E-24	Q4WCU6_ASPFU	Fumarate hydratase, putative	6.00E-23	Q5A6L1_CANAL	Hypothetical protein	8.00E-23	Q9W3X5_DROME	CG4095-PA	5.00E-22			M
CD092390	Q8DCG6_VIBVU	Predicted membrane protein	10	Q7MHE2_VIBVY	Predicted membrane protein	10												M
CONTIG9732	Q5DBW6_SCHJA	Hypothetical protein	4.00E-56	Q7PXI3_ANOGA	ENSANGP00000015797 (Fragment)	2.00E-31	Q3UX28_MOUSE	In vitro fertilized eggs cDNA, RIKEN full-length enriched library, clone:7420439	1.00E-30	Q4V8N5_RAT	Brain protein 44-like	1.00E-30	BR44L_RAT	Brain protein 44-like protein (Apoptosis-regulating basic protein)	1.00E-30			M
Contig3214		UNKNOWN 1923 POSSIBLE ANTISENSE	OM0023334-AOP	unnamed protein product [Mus musculus]	unnamed protein product [Mus musculus]													M
CD136026	Q9IBH3_BRARE	Hagoromo (Dactylaplasia)	0.002	FBXW4_MOUSE	F-box/WD-repeat protein 4 (F-box and WD-40 domain protein 4) (Hagoromo protein)	0.002	Q4YRF3_PLABE	U5 snrnp-specific protein, putative	0.003	Q7RLP1_PLAYO	Hypothetical protein	0.003	Q8QGU0_MELAU	F-box/WD40-repeat protein (Fragment)	0.004			M
>CL552	Q3KTL6_SCHJA	SJCHGC01393 protein	6.00E-04	Q59KL1_CANAL	Hypothetical protein	0.014	Q6CQF2_KLULA	Kluyveromyces lactis strain NRRL Y-1140 chromosome D of strain NRRL Y-1140 of Kl	0.018	Q652R5_ORYSA	Hypothetical protein P0603C10.50	0.2	TAR1_YEAST	Protein TAR1 (Transcript antisense to ribosomal RNA protein 1)	0.44			M
CONTIG4019	Q49UR6_STAS1	Putative extracellular amidase	1.2	Q612K6_CAEBR	Hypothetical protein CBG16678	1.2	Q4SR65_TETNG	Chromosome 11 SCAF14528, whole genome shotgun sequence. (Fragment)	3.4	Q60VU6_CAEBR	Hypothetical protein CBG19390	3.4	Q557G2_DICDI	Hypothetical protein	3.4			M
CONTIG9470	Q5BX67_SCHJA	SJCHGC05454 protein (Fragment)	1.00E-87	Q58D96_BOVIN	Isocitrate dehydrogenase 3 (NAD+) gamma isoform a	7.00E-59	Q58CP0_BOVIN	Isocitrate dehydrogenase 3 (NAD+) gamma isoform a	7.00E-59	IDH3G_MACFA	Isocitrate dehydrogenase [NAD] subunit gamma, mitochondrial precursor (EC 1.1.1.	7.00E-59	IDH3G_HUMAN	Isocitrate dehydrogenase [NAD] subunit gamma, mitochondrial precursor (EC 1.1.1.	7.00E-59			M
Contig931		UNKNOWN 502	OM0023378-AOP	hypothetical	hypothetical													M
CONTIG11143	Q4P3R9_USTMA	Hypothetical protein	3.00E-14	O04892_TOBAC	Cytochrome P450 like_TBP (EC 1.14.14.1)	3.00E-12	Q6I666_CITLA	Cytochrome P450 like_TBP	3.00E-09	Q6CQE7_KLULA	Similar to sp|Q8TGM7 Saccharomyces cerevisiae Hypothetical protein (Fragment)	7.00E-09	Q6CQE1_KLULA	Similar to sp|Q8TGM7 Saccharomyces cerevisiae Hypothetical 6.9 kDa protein	7.00E-09			M
CONTIG6765	Q4RGD8_TETNG	Chromosome 18 SCAF15100, whole genome shotgun sequence. (Fragment)	0.14	Q3XXX3_ENTFC	Peptidoglycan-binding LysM	0.24	Q54FS0_DICDI	Hypothetical protein	0.31	Q417H6_KINRA	Hypothetical protein	0.4	Q5M7J4_XENTR	Hypothetical LOC496876	0.69			M
SMLA51F07	Q5DDG1_SCHJA	SJCHGC06877 protein	4.00E-48	VA0D_MANSE	Vacuolar ATP synthase subunit d (EC 3.6.3.14) (V-ATPase d subunit) (Vacuolar pro	7.00E-33	Q61HB8_CAEBR	Hypothetical protein CBG10802	1.00E-32	Q95YD5_CAEEL	Vacuolar h atpase protein 16	1.00E-32	Q86EN3_SCHJA	Clone ZZD1599 mRNA sequence	3.00E-32			M
CD092311	DSG1_BOVIN	Desmoglein-1 precursor (Desmosomal glycoprotein 1) (DG1) (DGI) (Pemphigus foliac	0.52	Q9UII7_HUMAN	E-cadherin	1.2	CADH1_HUMAN	Epithelial-cadherin precursor (E-cadherin) (Uvomorulin) (Cadherin-1) (CAM 120/80	1.2	Q35X54_9GAMM	Soluble lytic murein transglycosylase, putative precursor	1.5	Q6BMR9_DEBHA	Debaryomyces hansenii chromosome F of strain CBS767 of Debaryomyces hansenii	1.5			M
Contig6439		UNKNOWN 3930	OM0023371-AOP	hypothetical	hypothetical													M
Contig5641		UNKNOWN 3328	OM0023349-AOP	similar to Tesmin (Metallothionein-like 5, testis-specific) (Testis-specific met	similar to Tesmin (Metallothionein-like 5, testis-specific) (Testis-specific met													M
CD120523																		M
CD136017	Q3AR79_9CHLB	Hypothetical protein	0.31	Q68DI8_HUMAN	Hypothetical protein DKFZp781B109	0.69	BAZ2A_HUMAN	Bromodomain adjacent to zinc finger domain 2A (Transcription termination factor	0.69	Q5TNZ3_ANOGA	ENSANGP00000028622 (Fragment)	0.9	Q6FRC9_CANGA	Candida glabrata strain CBS138 chromosome H complete sequence	1.2			M
Contig6815		UNKNOWN 4241	OM0023381-AOP															M
CD090237	Q5U4W6_XENLA	LOC495417 protein	3.00E-18	Q4RTK0_TETNG	Chromosome 2 SCAF14997, whole genome shotgun sequence	2.00E-17	Q61204_MOUSE	EGF repeat transmembrane protein	2.00E-16	Q6PDL7_MOUSE	Ddx26 protein	2.00E-16	Q8CCX8_MOUSE	Adult male medulla oblongata cDNA, RIKEN full-length enriched library, clone:633	6.00E-16			M
CD088357																		M
CONTIG3860	Q7PY42_ANOGA	ENSANGP00000011582 (Fragment)	3.00E-10	Q7KPW7_CAEEL	Hypothetical protein	2.00E-04	Q61T18_CAEBR	Hypothetical protein CBG05941	0.001	Q9VHT5_DROME	CG7494-PA (LD31571p)	0.001	NOSZ_RALSO	Nitrous-oxide reductase precursor (EC 1.7.99.6) (N(2)OR) (N2O reductase)	2.6			M
AF043417		SCHISTOSOMA MANSONI HEAT SHOCK TRANSCRIPTION FACTOR MRNA, ALTERNATIVELY SPLICED,	OM0023326-AOP															M
CONTIG10283	Q5DGJ2_SCHJA	SJCHGC09289 protein	e-175	Q86EJ5_SCHJA	Clone ZZD295 mRNA sequence	e-171	Q53YA2_HUMAN	CDC37 cell division cycle 37 homolog (S. cerevisiae)	8.00E-99	CDC37_HUMAN	Hsp90 co-chaperone Cdc37 (Hsp90 chaperone protein kinase-targeting subunit) (p5	8.00E-99	Q5EAC6_BOVIN	CDC37 protein	1.00E-98			M
CONTIG7354	Q3V3F2_MOUSE	3 days neonate thymus cDNA, RIKEN full-length enriched library, clone:A630007A19	4.00E-19	Q3UVU1_MOUSE	Adult male diencephalon cDNA, RIKEN full-length enriched library, clone:9330198H	4.00E-19	Q3TTU2_MOUSE	0 day neonate head cDNA, RIKEN full-length enriched library, clone:4832423G24 pr	4.00E-19	LHR2A_MOUSE	Loss of heterozygosity 11 chromosomal region 2 gene A protein homolog	4.00E-19	LHR2A_RAT	Loss of heterozygosity 11 chromosomal region 2 gene A protein homolog (Mast cell	4.00E-18			M
CD132727	Q9Y0D3_SCHMA	Thioredoxin peroxidase 2	0.31	Q5DVX5_SCHJA	Thioredoxin peroxidase-2	4.5	Q5DEY1_SCHJA	SJCHGC00794 protein	4.5									M
Contig2860		UNKNOWN 1631	OM0023394-AOP															M
Contig4946		UNKNOWN 2818	OM0023363-AOP	hypothetical	hypothetical													M
CD131629	Q5C4R3_SCHJA	SJCHGC07318 protein (Fragment)	5.00E-13	Q8TIR8_METAC	Phenylacetyl-CoA ligase	9.9												M
SMLC39F04	Q5T7L4_HUMAN	Sodium channel, nonvoltage-gated 1, delta	9.00E-14	Q5T7L3_HUMAN	Sodium channel, nonvoltage-gated 1, delta	9.00E-14	Q6ZMN3_HUMAN	Hypothetical protein FLJ16802	9.00E-14	SCNND_PANTR	Amiloride-sensitive sodium channel delta-subunit (Epithelial Na+ channel delta s	9.00E-14	SCNND_HUMAN	Amiloride-sensitive sodium channel delta-subunit (Epithelial Na+ channel delta s	9.00E-14			M
CD136135	Q6E5B3_9AGAR	Cellobiohydrolase I-I	6.00E-05	AXE1_TRIRE	Acetylxylan esterase precursor (EC 3.1.1.72)	1.00E-04	Q4WBW4_ASPFU	Acetyl xylan esterase, putative	3.00E-04	Q4IG63_GIBZE	Hypothetical protein	3.00E-04	Q12665_PENJA	Endoglucanase 2 (EC 3.2.1.4)	4.00E-04			M
CD138732	Q76F86_9ACAR	NADH-ubiquinone oxidoreductase chain 3 (EC 1.6.5.3) (NADH dehydrogenase subunit	0.89	Q8HQI5_IXOPE	NADH-ubiquinone oxidoreductase chain 3 (EC 1.6.5.3) (NADH dehydrogenase subunit	2	Q8HQJ8_ORNMO	NADH-ubiquinone oxidoreductase chain 3 (EC 1.6.5.3) (NADH dehydrogenase subunit	2.6	Q8HCK7_9ACAR	NADH-ubiquinone oxidoreductase chain 3 (EC 1.6.5.3) (NADH dehydrogenase subunit	2.6	Q6BDS9_9ODON	NADH dehydrogenase subunit 3	2.6			M
CD152038	Q5C221_SCHJA	SJCHGC04124 protein (Fragment)	3.00E-31	Q7Q1G0_ANOGA	ENSANGP00000015831 (Fragment)	9.00E-14	Q6BQ61_DEBHA	Similar to sp|P38712 Saccharomyces cerevisiae ATP-dependent rRNA helicase RRP3 (	5.00E-13	Q6INR0_XENLA	MGC81303 protein	6.00E-13	Q502B4_BRARE	Hypothetical protein zgc:112350	8.00E-13			M
SMLC27E08																		M
CONTIG3876	Q7ZVK7_BRARE	Peter pan homolog	1.00E-21	Q5FVQ2_RAT	Peter pan homolog (Drosophila) (Predicted)	6.00E-21	Q8BYM4_MOUSE	Adult male hypothalamus cDNA, RIKEN full-length enriched library, clone:A230087P	2.00E-20	SSF1_MOUSE	Suppressor of SWI4 1 homolog (Ssf-1) (Peter Pan homolog)	2.00E-20	Q4RHE7_TETNG	Chromosome 3 SCAF15050, whole genome shotgun sequence	5.00E-20			M
Contig3300		UNKNOWN 2001	OM0023396-AOP	hypothetical	hypothetical													M
Contig4926		UNKNOWN 2801	OM0023363-AOP	similar to hypothetical protein FLJ32549 [Homo sapiens] [Mus musculus]	similar to hypothetical protein FLJ32549 [Homo sapiens] [Mus musculus]													M
CD160339																		M
CD060932	Q300P1_STRSU	Ribonucleoside-diphosphate reductase (EC 1.17.4.1)	0.53	Q8E0B5_STRA5	Ribonucleoside-diphosphate reductase 2, alpha subunit	1.5	Q3K1N8_STRA1	Ribonucleoside-diphosphate reductase, alpha chain (EC 1.17.4.1)	1.5	Q3DR34_STRAG	Ribonucleoside-diphosphate reductase 2, alpha subunit (EC 1.17.4.1)	1.5	Q3DGX4_STRAG	Ribonucleoside-diphosphate reductase 2, alpha subunit	1.5			M
CD188649	Q59K62_CANAL	Potential ABC transporter	1.9	Q8I3T7_PLAF7	Hypothetical protein PFE0855c	2.5	Q8C4F9_MOUSE	0 day neonate cerebellum cDNA, RIKEN full-length enriched library, clone:C230033	4.2	Q9P6X3_NEUCR	Hypothetical protein 68B2.030	4.2	Q4E421_TRYCR	Hypothetical protein	5.5			M
Contig6043		SIMILAR TO Q9Y359 CGI-43 PROTEIN (3E-07)	OM0023350-AOP															M
CONTIG6586	Q8ITC2_AEQIR	Ribosomal protein L11	2.00E-68	Q4V8I6_RAT	Ribosomal protein L11	2.00E-67	Q3TPE3_MOUSE	12 days embryo eyeball cDNA, RIKEN full-length enriched library, clone:D230034M2	2.00E-67	Q8VC94_MOUSE	Rpl11 protein	2.00E-67	Q3T087_BOVIN	Hypothetical protein	2.00E-67			M
Contig4203		SIMILAR TO GLUTAMATE-CYSTEINE LIGASE, CATALYTIC SUBUNIT (1E-59)	OM0023400-AOP															M
Contig6505		UNKNOWN 3988	OM0023371-AOP															M
CONTIG2258	Q86FI7_SCHJA	Clone ZZD489 mRNA sequence	0	Q7Q4F2_ANOGA	ENSANGP00000019538	1.00E-62	Q5TQB5_ANOGA	ENSANGP00000029101 (Fragment)	6.00E-62	Q60F93_BOMMO	Molting fluid carboxypeptidase A	1.00E-60	Q702G3_ANOGA	Carboxypeptidase B precursor	3.00E-57			M
CONTIG13241	Q5BSR6_SCHJA	SJCHGC03464 protein (Fragment)	1.00E-38	Q5TN87_ANOGA	ENSANGP00000028164 (Fragment)	1.00E-04	Q5TN86_ANOGA	ENSANGP00000027371 (Fragment)	1.00E-04	Q9XZN5_MYAAR	E3 ubiquitin-protein ligase	2.00E-04	Q9VTH1_DROME	CG6190-PA (LD21888p)	2.00E-04			M
CONTIG12244	Q5DE67_SCHJA	SJCHGC02798 protein	9.00E-44	Q5BT41_SCHJA	SJCHGC02797 protein	3.00E-20	Q4V8Q4_BRARE	Hypothetical protein zgc:114204	3.00E-17	Q5RGW9_BRARE	Novel protein similar to human and mouse CGI-141 protein (CGI-141) (Fragment)	2.00E-16	Q6I9W6_HUMAN	CGI-141 protein	3.00E-16			M
>CL1048	Q3V288_MOUSE	13 days embryo liver cDNA, RIKEN full-length enriched library, clone:2510006J21	2.00E-63	Q3THC7_MOUSE	TIB-55 BB88 cDNA, RIKEN full-length enriched library, clone:I730091D16 product:r	2.00E-63	Q3T0S6_BOVIN	Hypothetical protein MGC127227	2.00E-63	Q567Q7_HUMAN	Ribosomal protein L8	2.00E-63	RL8_RAT	60S ribosomal protein L8	2.00E-63			M
Contig2262		SIMILAR TO RAS-RELATED PROTEIN RAP-1 (2E-05)	OM0023342-AOP															M
Contig5749		SIMILAR TO DNA TOPOISOMERASE I (1E-22) POSSIBLE ANTISENSE	OM0023351-AOP															M
Contig3898		UNKNOWN 2496	OM0023399-AOP	hypothetical	hypothetical													M
CONTIG7646	Q4H3T4_CIOIN	Transcription factor protein	2.00E-09	Q8NE75_HUMAN	CCAAT/enhancer binding protein zeta (Hypothetical protein tmp_locus_32)	8.00E-06	CEBPZ_HUMAN	CCAAT/enhancer binding protein zeta (CCAAT-box-binding transcription factor) (CC	8.00E-06	CEBPZ_MOUSE	CCAAT/enhancer binding protein zeta (CCAAT-box-binding transcription factor) (CC	1.00E-05	Q3UWQ7_MOUSE	In vitro fertilized eggs cDNA, RIKEN full-length enriched library, clone:7420469	2.00E-05			M
CD120998	Q5BT27_SCHJA	SJCHGC02953 protein (Fragment)	0.004															M
Contig5803		UNKNOWN 3441	OM0023352-AOP															M
Contig3149		UNKNOWN 1871 POSSIBLE ANTISENSE	OM0023334-AOP															M
Contig565		SIMILAR TO DNA REPLICATION LICENSING FACTOR (6E-12)	OM0023349-AOP															M
CD140224	Q8DHG2_SYNEL	Tlr1997 protein	0.047	Q4CT25_TRYCR	Hypothetical protein (Fragment)	0.18	Q4E0X7_TRYCR	Hypothetical protein	0.31	Q7XJP5_ARATH	At2g37810 protein (Putative CHP-rich zinc finger protein)	0.68	Q51BX4_ENTHI	Hypothetical protein	0.68			M
CONTIG5610	Q86EL5_SCHJA	Clone ZZD214 mRNA sequence	3.00E-85	CHM4C_XENLA	Charged multivesicular body protein 4c (Chromatin modifying protein 4c) (CHMP4c)	6.00E-41	CHM4B_CHICK	Charged multivesicular body protein 4b (Chromatin modifying protein 4b) (CHMP4b)	1.00E-40	CHM4B_BRARE	Charged multivesicular body protein 4b (Chromatin modifying protein 4b) (CHMP4b)	1.00E-40	CHM4B_HUMAN	Charged multivesicular body protein 4b (Chromatin modifying protein 4b) (CHMP4b)	4.00E-40			M
CD090891	Q5R8Y9_PONPY	Hypothetical protein DKFZp468J085 (Fragment)	0.001	Q9P2D0_HUMAN	KIAA1417 protein (Fragment)	0.001	Q5TFD7_HUMAN	OTTHUMP00000016784	0.001	Q3V3X0_MOUSE	Adult male thymus cDNA, RIKEN full-length enriched library, clone:5830448N01 pro	0.003	Q6ZPR6_MOUSE	MKIAA1417 protein (Fragment)	0.003			M
Contig2083		UNKNOWN 1009	OM0023330-AOP	Putative small GTPase activator with TBC domain [Caenorhabditis elegans]	Putative small GTPase activator with TBC domain [Caenorhabditis elegans]													M
Contig4803		UNKNOWN 2690	OM0023359-AOP															M
CD169460	ZRT1_YEAST	Zinc-regulated transporter 1 (High-affinity zinc transport protein ZRT1)	0.85	KR104_HUMAN	Keratin-associated protein 10-4 (Keratin-associated protein 10.4) (High sulfur k	28.5 (62), Expect(2) = 6.9	Q8U810_AGRT5	Alcohol dehydrogenase (AGR_L_1150p)	9.4	Q6JXE5_BOENI	NADH dehydrogenase subunit F (Fragment)	9.4						M
CONTIG4132	Q6LFP5_PLAF7	Putative ATP dependent RNA helicase (EC 3.6.1.-)	0.18	Q54K04_DICDI	Hypothetical protein	0.18	Q5GS08_WOLTR	Superfamily I DNA and RNA helicase, UvrD	0.41	Q5CLJ2_CRYHO	RIKEN cDNA 2610034K17	0.69	Q8I1N9_PLAF7	Hypothetical protein PFD0970c	1.2			M
>CL642	Q4RQM6_TETNG	Chromosome 2 SCAF15004, whole genome shotgun sequence	6.00E-22	Q9H8Y5_HUMAN	Hypothetical protein FLJ13144 (FLJ10415 protein)	7.00E-22	Q9CZF5_MOUSE	10, 11 days embryo whole body cDNA, RIKEN full-length enriched library, clone:28	2.00E-20	Q66H85_RAT	Hypothetical LOC363255	2.00E-19	Q5ZHK4_CHICK	Hypothetical protein	8.00E-13			M
>CL527																		M
CONTIG4491	Q5DDG6_SCHJA	SJCHGC02536 protein	0	Q3SZ71_BOVIN	Hypothetical protein MGC128129	e-152	Q5EB15_BRARE	Zgc:110738	e-152	MPPB_HUMAN	Mitochondrial processing peptidase beta subunit, mitochondrial precursor (EC 3.	e-151	Q5REK3_PONPY	Hypothetical protein DKFZp468I0224	e-151			M
Contig279		UNKNOWN 162	OM0023394-AOP	hypothetical	hypothetical													M
CD087175	Q4RUZ1_TETNG	Chromosome 12 SCAF14993, whole genome shotgun sequence. (Fragment)	0.047	Q3V1Z0_MOUSE	17 days embryo head cDNA, RIKEN full-length enriched library, clone:3321402K23	0.14	Q5RBD0_PONPY	Hypothetical protein DKFZp469H2039	0.14	Q5W134_HUMAN	RUN and SH3 domain containing 2	0.14	RUSC2_MOUSE	RUN and SH3 domain containing protein 2	0.14			M
CD095141	Q5C525_SCHJA	SJCHGC04867 protein (Fragment)	5.00E-38	Q5BSY3_SCHJA	SJCHGC03059 protein (Fragment)	6.00E-33	Q6P0T3_BRARE	Zinc finger protein 207	1.00E-08	Q9Z326_MOUSE	49 kDa zinc finger protein	8.00E-08	Q9JMD0_MOUSE	Zinc finger transcription factor ZNF207 (Zinc finger protein 207) (17 days embry	8.00E-08			M
Contig495		SIMILAR TO CELL DIVISION CYCLE 42 (GTP-BINDING PROTEIN, 25 KDA) 4E-70 POSSIBLE A	OM0023363-AOP															M
>CL320	Q5U0W8_DROME	LD01444p	9.00E-13	PHP_DROME	Polyhomeotic-proximal chromatin protein	9.00E-13	Q9W523_DROME	CG3895-PA	4.00E-12	Q9NF31_DROME	EG:BACN25G24.3 protein (Fbgn0004860;ph-d protein)	4.00E-12	PHC3_MOUSE	Polyhomeotic-like protein 3	1.00E-10			M
CONTIG12517	Q9W2H1_DROME	CG10795-PA (LD27358p)	0.01	Q7QJF1_ANOGA	ENSANGP00000019188	0.013	Q99MB3_MOUSE	Beta-amyloid binding protein	0.039	Q9BX74_HUMAN	Beta-amyloid binding protein precursor	0.039	Q4S8B0_TETNG	Chromosome undetermined SCAF14706, whole genome shotgun sequence. (Fragment)	0.15			M
CD130564	Q60LP2_CAEBR	Hypothetical protein CBG23489	2.6	Q4VPY3_9CICH	Short wavelength sensitive 2a (Fragment)	4.4	Q4VPY2_MELAU	Short wavelength sensitive 2a (Fragment)	4.4	Q4VPY1_9CICH	Short wavelength sensitive 2a (Fragment)	4.4	Q4VPY0_9CICH	Short wavelength sensitive 2a (Fragment)	4.4			M
Contig5342		SIMILAR TO GLYCOSYLTRANSFERASE (6E-09)	OM0023366-AOP															M
Contig4290		UNKNOWN 2718 POSSIBLE ANTISENSE	OM0023402-AOP															M
CONTIG4355	BCS1_XENLA	Mitochondrial chaperone BCS1 (BCS1-like protein)	5.00E-52	Q53EX1_HUMAN	BCS1-like variant (Fragment)	2.00E-51	BCS1_HUMAN	Mitochondrial chaperone BCS1 (BCS1-like protein) (H-BCS1)	2.00E-51	BCS1_MOUSE	Mitochondrial chaperone BCS1 (BCS1-like protein)	6.00E-51	BCS1_BRARE	Mitochondrial chaperone BCS1 (BCS1-like protein)	6.00E-51			M
CONTIG1089	Q5C4I9_SCHJA	SJCHGC03306 protein (Fragment)	8.00E-94	Q7QEJ7_ANOGA	ENSANGP00000020426 (Fragment)	0.024	Q8I5K5_PLAF7	Hypothetical protein	0.032	Q9RLQ0_MYCHO	P75 protein precursor	0.12	Q7R904_PLAYO	Homeobox-containing protein	0.16			M
CD069034	Q5C7Q1_SCHJA	SJCHGC08600 protein (Fragment)	1.00E-09	Q6CWS8_KLULA	Kluyveromyces lactis strain NRRL Y-1140 chromosome B of strain NRRL Y-1140 of K	3	Q8KMK0_9MOLU	LppT protein	6.7	Q59N38_CANAL	Hypothetical protein	6.7	Q4Y4P0_PLACH	Hypothetical protein (Fragment)	8.8			M
CONTIG7587	Q9VBJ2_DROME	CG8318-PB, isoform B	1.00E-12	Q95U43_DROME	GH08833p	1.00E-12	Q8IMS2_DROME	CG8318-PC, isoform C	1.00E-12	Q59DT9_DROME	CG8318-PD, isoform D	1.00E-12	O01399_DROME	Neurofibromin	1.00E-12			M
Contig1418		SIMILAR TO HISTONE H2A (2E-40)	OM0023384-AOP															M
Contig426		UNKNOWN 231 POSSIBLE ANTISENSE	OM0023400-AOP	Similar to hypothetical protein FLJ10342 [Danio rerio]	Similar to hypothetical protein FLJ10342 [Danio rerio]													M
CD130340	Q9FFC8_ARATH	Gb|AAD20098.1	0.89	Q93WJ9_ARATH	GARP-like putative transcription factor KANADI1 (KANADI protein)	0.89	Q5B574_EMENI	Hypothetical protein	1.2	Q4A2U1_9PHYC	Putative membrane protein precursor	2	Q59P50_CANAL	Hypothetical protein YSH1	4.4			M
Contig6049		UNKNOWN 3613	OM0023350-AOP	AF165892_1 RNA-binding protein SiahBP [Rattus norvegicus]	AF165892_1 RNA-binding protein SiahBP [Rattus norvegicus]													M
CD090913	O82380_ARATH	Hypothetical protein At2g29760	3.00E-09	Q9SUA7_ARATH	Hypothetical protein T13K14.230 (Hypothetical protein AT4g21070) (Fragment)	2.00E-08	O49549_ARATH	Hypothetical protein F7J7.10 (Fragment)	2.00E-08	Q6YWL6_ORYSA	Pentatricopeptide (PPR) repeat-containing protein-like	8.00E-08	Q9SR82_ARATH	T16O11.25 protein (Hypothetical protein F17O14.29)	2.00E-07			M
CD136146	Q7UQS7_RHOBA	Similar to protein disulfide-isomerase	2	P91344_CAEEL	Hypothetical protein	4.4	Q3PFL8_PARDE	Hypothetical protein	5.7	HOP1_YEAST	Meiosis-specific protein HOP1	7.5	Q36WV4_RHOPA	Hypothetical protein	9.8			M
CONTIG11516																		M
CD178210	Q4U8H3_THEAN	N-acetylglucosaminyl transferase, putative (EC 2.4.1.198)	7.5															M
CONTIG10308	Q7PRJ8_ANOGA	ENSANGP00000016048	9.00E-12	MERH_DROME	Moesin/ezrin/radixin homolog 2 (Ezrin-moesin-radixin-2) (Merlin protein) (dMerli	5.00E-11	Q6RW63_CHICK	Neurofibromatosis 2	8.00E-09	Q5ZJB0_CHICK	Hypothetical protein	8.00E-09	Q6AZJ7_XENLA	Nf2-prov protein	1.00E-08			M
SMLC26A10	Q5DB55_SCHJA	SJCHGC00821 protein	2.00E-04	Q2YHG1_CLOSI	MRLC	2.00E-04	Q86EK2_SCHJA	Clone ZZD263 mRNA sequence	0.052	Q26069_PLAMG	Myosin regulatory light chain	0.15	MLRA_PATYE	Myosin regulatory light chain A, smooth adductor muscle	0.15			M
CD195647	Q6PGW3_BRARE	Hypothetical protein zgc:63733	9.8															M
Contig6524		UNKNOWN 4002	OM0023371-AOP															M
CD087152	Q4TGY3_TETNG	Chromosome undetermined SCAF3381, whole genome shotgun sequence. (Fragment)	2.00E-10	Q4TDU4_TETNG	Chromosome undetermined SCAF6036, whole genome shotgun sequence. (Fragment)	2.00E-10	Q9HAM8_HUMAN	NOX5	1.00E-09	Q9H6E0_HUMAN	Hypothetical protein FLJ22358	1.00E-09	Q96PJ9_HUMAN	NADPH oxidase 5 beta	1.00E-09			M
Contig7090		UNKNOWN 4489	OM0023379-AOP	Nucleolin (Protein C23) (sp|NUCL_XENLA)	Nucleolin (Protein C23) (sp|NUCL_XENLA)													M
CONTIG3886	Q6WBY4_AIPPU	Beta actin	1.00E-19	Q4I623_GIBZE	ACTG_CEPAC Actin, gamma	6.00E-19	Q4P0Z6_USTMA	ACT_PHARH ACTIN	2.00E-18	Q800P5_9NEOB	Beta actin (Fragment)	2.00E-18	Q5ZMQ2_CHICK	Hypothetical protein	2.00E-18			M
CD192526	Q5DFI5_SCHJA	SJCHGC02537 protein (Fragment)	1.00E-44	Q5DDG6_SCHJA	SJCHGC02536 protein	1.00E-39	Q5EB15_BRARE	Zgc:110738	7.00E-30	Q4T134_TETNG	Chromosome undetermined SCAF10737, whole genome shotgun sequence. (Fragment)	9.00E-30	Q3TET5_MOUSE	17 days embryo kidney cDNA, RIKEN full-length enriched library, clone:I920195L04	5.00E-29			M
CD171538																		M
Contig65		SIMILAR TO HYPOTHETICAL H. SAPIENS PROTEIN (5E-22).	OM0023371-AOP															M
CONTIG2697	Q5DC22_SCHJA	SJCHGC05364 protein	8.00E-46	Q3U0Y2_MOUSE	Activated spleen cDNA, RIKEN full-length enriched library, clone:F830022J16 prod	3.00E-04	Q8NCS4_HUMAN	ZMYM6 protein	0.031	Q5TRZ0_ANOGA	ENSANGP00000029208	3.8	Q88JE2_PSEPK	Exodeoxyribonuclease III, putative	8.6			M
CD189191	Q5C317_SCHJA	SJCHGC01097 protein (Fragment)	6.00E-18	Q5BYB6_SCHJA	Hypothetical protein	6.00E-18	Q4RZ26_TETNG	Chromosome 16 SCAF14974, whole genome shotgun sequence. (Fragment)	3.00E-14	Q7SYE2_BRARE	Actinin alpha 4	3.00E-14	Q6DFP7_XENTR	Actinin, alpha 4	7.00E-14			M
CD077037	Q4Z7Q2_PLABE	Hypothetical protein	0.68	Q7RK32_PLAYO	Hypothetical protein	2	Q8I2S8_PLAF7	Hypothetical protein PFI1120c	2.6	Q98RV2_GUITH	Hypothetical protein orf590	4.4	Q4YZ61_PLABE	Hypothetical protein	5.7			M
CD168854	Q5ZY14_LEGPH	Acetyoacetyl CoA reductase (EC 1.1.1.36)	8.5	Q5X7I4_LEGPA	Hypothetical protein	8.5	Q5WYY1_LEGPL	Hypothetical protein	8.5									M
CONTIG6154	Q4ZSF7_PSEU2	Peptidase C1A, papain	2.00E-08	Q48J71_PSE14	Papain cysteine protease family protein	2.00E-08	Q880Z6_PSESM	Papain cysteine protease family protein	5.00E-08	Q5UQE9_MIMIV	Cathepsin B, cystein protease	5.00E-07	Q87F13_XYLFT	Cysteine protease	2.00E-04			M
CD141308																		M
CD114325																		M
CD113411																		M
CD066307	Q95F26_9POAL	Maturase	5.8	Q9MV02_9POAL	Maturase	9.8												M
CD136142	Q61CN3_CAEBR	Hypothetical protein CBG12836 (Fragment)	4.00E-34	PDE5_CAEEL	Probable 3',5'-cyclic phosphodiesterase pde-5 (EC 3.1.4.17)	4.00E-34	Q4RQ45_TETNG	Chromosome 17 SCAF15006, whole genome shotgun sequence. (Fragment)	5.00E-31	Q7ZW87_BRARE	Similar to phosphodiesterase 10A	2.00E-30	Q8CA95_MOUSE	Adult male spinal cord cDNA, RIKEN full-length enriched library, clone:A330007F1	4.00E-30			M
Contig4350		SIMILAR TO RHO GTPASE ACTIVATING PROTEIN 8 ISOFORM 1 (3E-40)	OM0023402-AOP															M
Contig2934		UNKNOWN 1698	OM0011067-NOP	hypothetical	hypothetical													M
CD132382	ITA1_HUMAN	Integrin alpha-1 (Laminin and collagen receptor) (VLA-1) (CD49a)	0.31	Q3V3R4_MOUSE	16 days neonate cerebellum cDNA, RIKEN full-length enriched library, clone:96300	0.9	Q3V391_MOUSE	10 days neonate cortex cDNA, RIKEN full-length enriched library, clone:A830030M1	0.9	Q3URV2_MOUSE	ES cells cDNA, RIKEN full-length enriched library, clone:C330006I16 product:hypo	0.9	ITA1_RAT	Integrin alpha-1 precursor (Laminin and collagen receptor) (VLA-1) (CD49a)	1.2			M
CD135828	Q4UAG9_THEAN	Leucine carboxylmethyl transferase, putative	5.8															M
CD169646	Q39NT0_9BURK	Exporter, RND superfamily	1.2	Q46ME3_RALEJ	Transporter, putative	1.2	Q3KCL5_PSEFL	Transporter, putative	2	Q5FIT2_LACAC	Beta-glucoside-specific enzyme II (EC 2.7.1.69)	5.9						M
CD131163	Q5ACU6_CANAL	Hypothetical protein RRP3	1.00E-20	Q6BQ61_DEBHA	Similar to sp|P38712 Saccharomyces cerevisiae ATP-dependent rRNA helicase RRP3 (	3.00E-19	Q6FNK8_CANGA	Similar to sp|P38712 Saccharomyces cerevisiae YHR065c RRP3	7.00E-19	Q6CT85_KLULA	Kluyveromyces lactis strain NRRL Y-1140 chromosome C of strain NRRL Y-1140 of Kl	7.00E-19	Q75EW9_ASHGO	AAL041Cp	1.00E-18			M
CD131414	Q5G792_9SCOR	NADH dehydrogenase subunit 1	4.5															M
CONTIG3834	Q3V333_MOUSE	Adult pancreas islet cells cDNA, RIKEN full-length enriched library, clone:C8200	2.00E-08	Q3U564_MOUSE	2 days neonate thymus thymic cells cDNA, RIKEN full-length enriched library, clo	2.00E-08	Q3SZL6_BOVIN	Hypothetical protein MGC127127	2.00E-07	Q4SQ61_TETNG	Chromosome 19 SCAF14535, whole genome shotgun sequence. (Fragment)	3.00E-07	DCP1B_PONPY	mRNA decapping enzyme 1B (EC 3.-.-.-)	3.00E-07			M
CONTIG10286	Q4SG95_TETNG	Chromosome 17 SCAF14597, whole genome shotgun sequence. (Fragment)	2.00E-13	Q640K3_XENLA	LOC494653 protein	1.00E-12	Q53Y35_HUMAN	NCK-associated protein 1	2.00E-12	NCKP1_HUMAN	Nck-associated protein 1 (NAP 1) (p125Nap1) (Membrane-associated protein HEM-2)	2.00E-12	Q32PY0_RAT	Hypothetical protein (Fragment)	3.00E-12			M
CD066231	Q5C819_SCHJA	SJCHGC05884 protein (Fragment)	2.00E-78	Q9VX41_DROME	CG5675-PA (LD29081p)	3.00E-39	Q9GQQ6_DROME	DX11	3.00E-39	Q61F06_CAEBR	Hypothetical protein CBG11848 (Fragment)	3.00E-35	LIN10_CAEEL	Abnormal cell lineage protein 10 (Protein lin-10)	1.00E-34			M
CONTIG12056	Q5M9F8_RAT	SCY1-like 1 (S. cerevisiae) (Predicted)	9.00E-23	Q9EQC5_MOUSE	105-kDa kinase-like protein (Leydig cells CRL-2065 MLTC-1 cDNA, RIKEN full-lengt	3.00E-22	Q3UKU0_MOUSE	14 days pregnant adult female placenta cDNA, RIKEN full-length enriched library,	3.00E-22	Q3TST7_MOUSE	13 days embryo male testis cDNA, RIKEN full-length enriched library, clone:60304	3.00E-22	Q8K222_MOUSE	SCY1-like 1	3.00E-22			M
CD190102	Q54YP3_DICDI	Hypothetical protein	0.003	Q55G20_DICDI	Hypothetical protein	0.01	Q8IDR7_PLAF7	Hypothetical protein PF13_0230	0.063	Q55CK7_DICDI	Zn finger-containing protein	0.082	Q8IE55_PLAF7	Hypothetical protein MAL13P1.145	0.11			M
Contig5616		UNKNOWN 3311	OM0023347-AOP	hypothetical	hypothetical													M
CD119155	Q3B737_BRARE	Hypothetical protein (Fragment)	1.5	Q566P5_BRARE	LOC553399 protein (Fragment)	4.5	Q3KN39_DROME	LP13775p	7.6	Q9V706_DROME	CG13942-PA	7.6	HID_DROME	Cell death protein W (Head involution defective protein) (Wrinkled protein)	7.6			M
CD189126	Q5DAD7_SCHJA	SJCHGC06288 protein	0.048	Q26520_SCHJA	JF-2 protein (Fragment)	0.048												M
CD077636	Q86F69_SCHJA	Clone ZZD1068 mRNA sequence	1.00E-36	Q4RPY7_TETNG	Chromosome 17 SCAF15006, whole genome shotgun sequence. (Fragment)	2.00E-21	Q6F596_RAT	Geranylgeranyl diphosphate synthase1	2.00E-20	Q3V0T8_MOUSE	Adult male testis cDNA, RIKEN full-length enriched library, clone:4930507P03 pro	2.00E-20	GGPPS_MOUSE	Geranylgeranyl pyrophosphate synthetase (GGPP synthetase) (GGPPSase) (Geranylger	2.00E-20			M
CD094692	Q97LJ9_CLOAB	Cellulase CelE ortholog; dockerin domain	1.3	Q61UL4_CAEBR	Hypothetical protein CBG05256	1.3	UNC9_CAEEL	Innexin unc-9 (Uncoordinated protein 9)	1.3	Q9VHB4_DROME	CG16789-PA	2.9	Q8SX18_DROME	RH08189p	2.9			M
Contig6849		UNKNOWN 4275	OM0023381-AOP															M
CONTIG5731	Q5BWD6_SCHJA	SJCHGC00602 protein (Fragment)	e-154	Q6DRI3_BRARE	RNA 3'-terminal phosphate cyclase-like protein	3.00E-66	Q504F0_BRARE	RNA terminal phosphate cyclase-like 1	2.00E-65	Q3THS8_MOUSE	TIB-55 BB88 cDNA, RIKEN full-length enriched library, clone:I730061H20 product:	2.00E-63	Q7TMT8_MOUSE	Rnac-pending protein	7.00E-63			M
CD195728																		M
CD152776	Q5DEX4_SCHJA	SJCHGC06224 protein	1.00E-19	Q3TJW1_MOUSE	Blastocyst blastocyst cDNA, RIKEN full-length enriched library, clone:I1C0048M22	1.00E-09	Q6P9T6_MOUSE	Acyl-Coenzyme A binding domain containing 3	1.00E-09	Q7QBG2_ANOGA	ENSANGP00000014744 (Fragment)	1.00E-09	GCP60_MOUSE	Golgi resident protein GCP60 (Acyl-CoA-binding domain-containing protein 3) (Gol	1.00E-09			M
CONTIG1543	Q5C2G3_SCHJA	SJCHGC08856 protein (Fragment)	2.00E-79	Q6NY65_BRARE	Chromosome condensation 1	2.00E-25	Q6PFB2_MOUSE	Rcc1 protein	7.00E-25	Q6NT97_HUMAN	RCC1 protein	1.00E-24	Q3U6D2_MOUSE	Bone marrow macrophage cDNA, RIKEN full-length enriched library, clone:I830127B1	2.00E-24			M
CD097021	Q5BW63_SCHJA	SJCHGC05682 protein (Fragment)	3.00E-17	GAS2_HUMAN	Growth-arrest-specific protein 2 (GAS-2)	1.00E-04	Q9D699_MOUSE	0 day neonate skin cDNA, RIKEN full-length enriched library, clone:4631403A13 pr	5.00E-04	GAS2_MOUSE	Growth-arrest-specific protein 2 (GAS-2)	5.00E-04	Q9D2H3_MOUSE	Adult male testis cDNA, RIKEN full-length enriched library, clone:4930500E24 pro	0.001			M
CD092373																		M
Contig5748		UNKNOWN 3400	OM0023351-AOP															M
CD131370	Q8R6Z3_THETN	Predicted hydrolase of the HD superfamily (Permuted catalytic motifs)	9.8	Q830H0_ENTFA	Hypothetical protein	9.8												M
CD080991	Q5D901_SCHJA	SJCHGC03671 protein	2.00E-16	Q4SIC0_TETNG	Chromosome 5 SCAF14581, whole genome shotgun sequence. (Fragment)	4.00E-11	Q640A8_XENTR	Hypothetical protein LOC496418	7.00E-10	Q9GV20_CIOSA	Cytochrome b5	2.00E-09	Q5S4Q9_XENLA	Cytochrome b5 (Hypothetical protein)	3.00E-09			M
Contig2070		SIMILAR TO PROTEASOME SUBUNIT ALPHA TYPE 5 (EC 3.4.25.1) (PROTEASOME ZETA CHAIN)	OM0023330-AOP															M
>CL730	Q5C5E4_SCHJA	SJCHGC02664 protein (Fragment)	9.00E-81	Q5DCQ4_SCHJA	Hypothetical protein	1.00E-54	Q7PKK5_ANOGA	ENSANGP00000022722 (Fragment)	4.00E-36	Q9W135_DROME	CG13588-PA	4.00E-32	Q8T0D9_DROME	LD08718p (CG10889-PA)	5.00E-31			M
CD161515																		M
CD076390	Q8IDZ6_PLAF7	Hypothetical protein PF13_0182	2.3	Q4X2H0_PLACH	Hypothetical protein (Fragment)	8.6												M
Contig1769		UNKNOWN 828	OM0023329-AOP	calcium-binding protein - tapeworm (Echinococcus granulosus) (fragment) (pir|PC4	calcium-binding protein - tapeworm (Echinococcus granulosus) (fragment) (pir|PC4													M
CONTIG5866	Q5C0T8_SCHJA	SJCHGC04336 protein (Fragment)	4.00E-46	TOPB1_MOUSE	DNA topoisomerase II binding protein 1 (DNA topoisomerase IIbeta-binding protei	0.003	TOPB1_HUMAN	DNA topoisomerase II binding protein 1 (DNA topoisomerase IIbeta-binding protei	0.008	Q4S1H0_TETNG	Chromosome 6 SCAF14768, whole genome shotgun sequence. (Fragment)	0.032	Q800K6_XENLA	Cut5-related protein	0.054			M
Contig2740		UNKNOWN 1560	OM0023391-AOP															M
CONTIG5799	Q5REE8_PONPY	DNA-directed RNA polymerase (EC 2.7.7.6)	0.002	Q5RB08_PONPY	DNA-directed RNA polymerase (EC 2.7.7.6)	0.002	Q585T5_HUMAN	Hypothetical protein POLR1B	0.002	Q9NVC2_HUMAN	Hypothetical protein FLJ10816	0.002	Q6ZRR2_HUMAN	Hypothetical protein FLJ46164	0.002			M
AF031034		SCHISTOSOMA MANSONI TRYPTOPHAN HYDROXYLASE (TPH) MRNA, COMPLETE CDS [POLY-A TAIL	OM0023326-AOP															M
CD192209	Q95PA1_LOLPE	Synaphin A	5.00E-06	Q5DA47_SCHJA	SJCHGC05979 protein	2.00E-05	Q9NBA0_DROME	Complexin	3.00E-05	Q8MRE4_DROME	GH27718p (RH26459p)	3.00E-05	Q8IPM9_DROME	CG32490-PE, isoform E	3.00E-05			M
CD121556	Q5C350_SCHJA	SJCHGC05583 protein (Fragment)	5.00E-28	Q4DDM2_TRYCR	Hypothetical protein	5.7												M
CONTIG3558	Q3BKI1_9PROT	Hypothetical protein	5.00E-37	Q3XDT2_MOOTH	Hypothetical protein	4.00E-36	Q3RNV3_9BURK	Hypothetical protein	6.00E-29	Q4BSK4_BURVI	Hypothetical protein	9.00E-28	Q62IR9_BURMA	Hypothetical protein	6.00E-24			M
CONTIG9132	Q5C2C1_SCHJA	SJCHGC04323 protein (Fragment)	1.00E-85	Q5BXF3_SCHJA	SJCHGC03349 protein (Fragment)	2.00E-73	Q9W062_DROME	CG1017-PA (GH07619p)	1.00E-63	Q640K9_XENTR	Hypothetical LOC496412	5.00E-62	Q5EAZ0_XENLA	Hypothetical protein	6.00E-62			M
CD192230	Q5BYE3_SCHJA	SJCHGC07959 protein (Fragment)	0.01	Q4T089_TETNG	Chromosome undetermined SCAF11289, whole genome shotgun sequence. (Fragment)	0.048	Q7Z3L5_HUMAN	Hypothetical protein DKFZp686H0688	0.048	Q7Z344_HUMAN	Hypothetical protein DKFZp686M09125 (Fragment)	0.048	ANK2_HUMAN	Ankyrin-2 (Brain ankyrin) (Ankyrin B) (Ankyrin, nonerythroid)	0.048			M
CD088002	O81639_PIMBR	Zinc finger protein	0.23	Q6JLA6_SOLTU	Pollen-specific lysine-rich protein SBgLR	1.5	Q6CNP4_KLULA	Similarity	3.3	Q5CY35_CRYPV	Cryptosporidium family of large secreted proteins (CpLSP) signal peptide, secret	4.3	Q4Z617_PLABE	Hypothetical protein (Fragment)	5.6			M
CD069140	Q30KX0_SCHMA	Reverse transcriptase SR3-left (Fragment)	0.006	Q30KW9_SCHMA	Reverse transcriptase SR3-right (Fragment)	0.11	Q5D952_SCHJA	SJCHGC04954 protein	0.4	Q3MJW0_SCHJA	SJCHGC03052 protein	1.2	Q4QQE8_SCHMA	Endonuclease-reverse transcriptase	1.5			M
>CL1508	Q56VC9_ORYLA	Caspase-8	4.00E-18	Q56VC3_PIG	Caspase-8	2.00E-17	Q5U3Q7_BRARE	Zgc:101776	1.00E-16	Q4V923_BRARE	Zgc:101776 protein	1.00E-16	Q9JHX4_RAT	Caspase-8	1.00E-15			M
Contig997		SIMILAR TO Q9VBX9 CG11935 PROTEIN 8E-42	OM0023376-AOP															M
CD093960	Q4XMD0_PLACH	Hypothetical protein (Fragment)	2.1															M
CONTIG1525	Q4VG19_LILLO	Pollen ankyrin-like protein	0.59	Q7RTC3_PLAYO	Hypothetical protein	1.7	Q4XRR5_PLACH	Hypothetical protein	2.9	Q4U9E8_THEAN	Hypothetical protein	3.8	Q4XUF6_PLACH	Hypothetical protein (Fragment)	5			M
CD180491	Q7PSL4_ANOGA	ENSANGP00000003886 (Fragment)	8.00E-26	Q7PFH4_ANOGA	ENSANGP00000022724	2.00E-24	Q7QH35_ANOGA	ENSANGP00000019737	6.00E-24	Q4RN96_TETNG	Chromosome 1 SCAF15015, whole genome shotgun sequence	8.00E-24	Q58GH6_RAT	ADAM9	6.00E-23			M
Contig5967		UNKNOWN 3551	OM0023348-AOP	Lamin [Astropecten brasiliensis]	Lamin [Astropecten brasiliensis]													M
CONTIG8885																		M
Contig4111		SIMILAR TO GUANINE NUCLEOTIDE REGULATORY PROTEIN (3E-52)	OM0023392-AOP															M
CONTIG2611	Q5DGW7_SCHJA	SJCHGC05089 protein	2.00E-90	O12997_XENLA	Fast skeletal troponin C beta (Hypothetical protein)	9.00E-10	O12996_XENLA	Fast skeletal troponin C alpha	1.00E-09	TNNC2_RANES	Troponin C, skeletal muscle	1.00E-09	O42136_LAMJA	Troponin C	6.00E-09			M
CONTIG5679																		M
CD186166	Q7MWB4_PORGI	Lipoprotein, putative	0.91	Q9CK27_PASMU	Hypothetical protein PM1808	4.5	Q5F4U0_CAEEL	Cadherin family protein 10	5.9									M
CONTIG10680	Q8RH77_FUSNN	Hypothetical protein FN0033	9.9															M
CONTIG6698	Q26056_PLALO	Histidine-rich protein (Fragment)	5.4	Q6EKW2_XENLA	Rad26	7.1	Q4V7U7_XENLA	RAD26 protein	7.1									M
SMLA13H01	Q5D8W8_SCHJA	SJCHGC02388 protein	8.00E-59	Q3MJK8_9ANNE	Cement protein 3B variant 2	0.002	Q4YXA5_PLABE	Protein prenyltransferase alpha subunit, putative (Fragment)	0.25	Q8I283_PLAF7	Hypothetical protein PFA0285c	0.72	Q7R9P8_PLAYO	Hypothetical protein	0.94			M
Contig5304		UNKNOWN 3123	OM0023366-AOP	microtubule-associated protein 1 B [Mus musculus]	microtubule-associated protein 1 B [Mus musculus]													M
CONTIG4018	Q7Q1V5_ANOGA	ENSANGP00000020999 (Fragment)	0.52	Q7MSE9_WOLSU	Pilin biogenesis	5.7												M
CONTIG5114	Q5BY31_SCHJA	SJCHGC04589 protein (Fragment)	1.00E-25	Q9VQJ0_DROME	CG3151-PA, isoform A	1.2	Q7KU26_DROME	CG3151-PD, isoform D	1.2	Q7KU23_DROME	CG3151-PB, isoform B (Cg3151-pc, isoform c) (RNA-binding protein)	1.2	Q26293_DROME	RRM9	1.2			M
Contig4355		SIMILAR TO AAM52641 GH22890 (8E-39)	OM0023402-AOP															M
Contig1412		SIMILAR TO F-LAN-1 (HYPOTHETICAL TRANSMEMBRANE PROTEIN SBBI53) (F-LANA) 2E-61	OM0023384-AOP															M
SMLA32A10	Q65A65_SCHMA	P2X ATP gated ion channel	8.00E-67	Q4QVH2_SCHMA	ATP-gated channel subunit	2.00E-66	Q9DDP3_XENLA	ATP-gated ion channel subunit P2X4 (Fragment)	2.00E-64	Q9DDP0_XENLA	ATP-gated ion channel subunit P2X4	2.00E-64	Q9DD61_XENLA	ATP-gated ion channel subunit P2X4	2.00E-64			M
CD171260																		M
CD171123	Q9NDQ1_CIOIN	Fibrinogen-like protein	0.1	Q86JW4_DICDI	Similar to Dictyostelium discoideum (Slime mold). MkpA protein (Hypothetical pro	7.5	Q55EI8_DICDI	Putative tyrosine kinase-like (TKL) protein	9.8	Q4YZ51_PLABE	Hypothetical protein (Fragment)	9.8	Q86AU0_DICDI	Similar to Mus musculus (Mouse). Adult male liver tumor cDNA, RIKEN full-length	9.8			M
CONTIG9339	Q3KZ51_SCHJA	SJCHGC03568 protein (Fragment)	1.00E-92	TSSC1_MACFA	Protein TSSC1	3.00E-18	TSSC1_BRARE	Protein TSSC1	4.00E-18	TSCC1_MOUSE	Protein TSSC1	4.00E-18	TSSC1_RAT	Protein TSSC1	5.00E-18			M
SMLA49C03	Q4QQF4_SCHMA	Gag-pol polyprotein	5.00E-17	Q4QQF3_SCHMA	Gag-pol polyprotein	5.00E-17	Q8JGS5_BRARE	Structural maintenance of chromosomes family member SMC4-like protein 1	1.00E-12	Q803Q9_BRARE	Smc4l1 protein (Fragment)	1.00E-12	Q4SPN5_TETNG	Chromosome 16 SCAF14537, whole genome shotgun sequence. (Fragment)	7.00E-12			M
SMLA57D01																		M
CONTIG9453	Q7YTH1_CAEEL	Hypothetical protein	4.00E-04	Q8ML77_DROME	CG33184-PB, isoform B (Cg33184-pc, isoform c)	5.00E-04	Q61R01_CAEBR	Hypothetical protein CBG06799	0.008	Q7PZ40_ANOGA	ENSANGP00000014733 (Fragment)	0.013	Q4XMQ0_PLACH	Hypothetical protein (Fragment)	2.1			M
CD062986	Q5C3X4_SCHJA	SJCHGC07137 protein (Fragment)	1.00E-20	Q6C270_YARLI	Yarrowia lipolytica chromosome F of strain CLIB122 of Yarrowia lipolytica	1.2	Q6BKJ3_DEBHA	Similar to YALI0F10285g Yarrowia lipolytica	1.5	Q6BEW2_CAEEL	Uncoordinated protein 73, isoform f	4.4	Q7KPP4_CAEEL	Guanine nucleotide exchange factor UNC-73B (Uncoordinated protein 73, isoform b	4.4			M
CD113073	Q960F7_DROME	SD03629p (CG2017-PA, isoform A)	0.74	Q59U37_CANAL	Hypothetical protein	3.7	Q59U13_CANAL	Hypothetical protein	3.7	O77336_PLAF7	Hypothetical protein MAL3P3.18	8.2	Q8IED7_PLAF7	Hypothetical protein MAL13P1.93	8.2			M
Contig3600		UNKNOWN 2272	OM0023368-AOP															M
CONTIG3731	Q5BLI9_BRARE	Im:7148241 protein (Fragment)	2.00E-34	Q3V3M6_MOUSE	16 days neonate thymus cDNA, RIKEN full-length enriched library, clone:A130075I0	4.00E-34	Q80XM5_MOUSE	D9Ertd809e protein	4.00E-34	Q9NSL4_HUMAN	Hypothetical protein DKFZp761N1024 (OTTHUMP00000017984) (Fragment)	4.00E-34	Q9UPN5_HUMAN	KIAA1117 protein (Fragment)	4.00E-34			M
Contig2567		UNKNOWN 1404	OM0023333-AOP															M
CD152780																		M
CD146730	Q5BSA3_SCHJA	SJCHGC05284 protein	0.031	Q5BSG6_SCHJA	SJCHGC04354 protein (Fragment)	2.2	Q8T5G5_SCHJA	Polyprotein	2.9	Q8MWP9_SCHJA	Polyprotein (Fragment)	2.9	Q8MWP8_SCHJA	Polyprotein (Fragment)	2.9			M
CD136096	Q8I3F9_PLAF7	Diaphanous homolog, putative	0.53	Q5BFG5_EMENI	Hypothetical protein	2.6	Q7R4J2_GIALA	GLP_49_54065_50967	7.6									M
Contig4678		SIMILAR TO BRM PROTEIN (REGULATES CHROMATIN CONFORMATION) 8E-93	OM0023331-AOP															M
CD065949																		M
CONTIG5854	Q5DNU4_CHOFU	DEAD box RNA helicase	4.00E-51	Q7QE45_ANOGA	ENSANGP00000016791 (Fragment)	5.00E-51	Q5R6D8_PONPY	Hypothetical protein DKFZp459D167	1.00E-49	Q9Y658_HUMAN	RNA helicase	2.00E-49	Q7L014_HUMAN	Prp5-like DEAD-box protein	2.00E-49			M
Contig2195		SIMILAR TO NATURAL RESISTANCE ASSOCIATED MACROPHAGE PROTEIN (8E-13)	OM0023343-AOP															M
Contig6614		UNKNOWN 4077	OM0023344-AOP	Similar to CD151 antigen [Mus musculus]	Similar to CD151 antigen [Mus musculus]													M
CONTIG11737	Q5DGL7_SCHJA	SJCHGC01026 protein	4.00E-72	Q5DDY2_SCHJA	Hypothetical protein	3.00E-49	Q5C5N5_SCHJA	SJCHGC01166 protein (Fragment)	0.24	O77306_PLAF7	Serine/threonine protein kinase, putative	0.24	Q54I52_DICDI	Hypothetical protein	0.54			M
Contig7073		UNKNOWN 4478	OM0023379-AOP															M
Contig5271		UNKNOWN 3102	OM0023332-AOP	hypothetical	hypothetical													M
CD160225	Q3S0Q7_9BURK	Polysaccharide biosynthesis protein	4.00E-06	Q8KIT7_PSEAE	Serotype 013 putative O-antigen biosynthesis gene cluster, partial sequence	3.00E-05	Q8KIT1_PSEAE	Similar to Polysaccharide biosynthesis protein	3.00E-05	Q47GK8_DECAR	Polysaccharide biosynthesis protein	6.00E-05	Q46Q92_RALEJ	Polysaccharide biosynthesis protein	8.00E-05			M
CONTIG5597	Q4SBP6_TETNG	Chromosome 18 SCAF14665, whole genome shotgun sequence. (Fragment)	4.00E-31	ABCG2_MOUSE	ATP-binding cassette sub-family G member 2 (Breast cancer resistance protein 1 h	5.00E-31	Q4SPA5_TETNG	Chromosome undetermined SCAF14541, whole genome shotgun sequence	6.00E-31	ABCG2_RAT	ATP-binding cassette sub-family G member 2 (Breast cancer resistance protein 1 h	8.00E-31	Q4GZT4_BOVIN	ATP-binding cassette superfamily G member 2 transporter	2.00E-30			M
CONTIG6375	Q6MA23_PARUW	Hypothetical protein	0.91	Q4XS88_PLACH	Hypothetical protein (Fragment)	1.2	Q8I284_PLAF7	Asparagine-rich antigen Pfa35-2	1.2	Q6LFH6_PLAF7	Hypothetical protein	2.6	Q55GE4_DICDI	Hypothetical protein	2.6			M
CONTIG3125	Q5BZM7_SCHJA	SJCHGC05351 protein (Fragment)	3.00E-14	Q5C1M4_SCHJA	SJCHGC02988 protein (Fragment)	7.00E-09	Q54VU8_DICDI	Hypothetical protein	1.2	Q7RIU8_PLAYO	Hypothetical protein	2.6	Q985K9_RHILO	Putative Rieske-like ferredoxin; MocE	4.4			M
CD150105	Q5M1U7_STRT1	Hypothetical protein	2.00E-10	Q5M6D8_STRT2	Hypothetical protein	6.00E-10	Q8DUR0_STRMU	Hypothetical protein SMU.843	5.00E-09	Q8E4G0_STRA3	Hypothetical protein gbs1441	2.00E-08	Q8DYV2_STRA5	Hypothetical protein SAG1371	2.00E-08			M
CD077849																		M
CF500454	Q6ZT50_HUMAN	Hypothetical protein FLJ44955	3.00E-33	Q6ZU06_HUMAN	Hypothetical protein FLJ44076	1.00E-19	Q5GMF8_HUMAN	Hypothetical protein DKFZp686D123	3.00E-18	Q6ZV72_HUMAN	Hypothetical protein FLJ42916	4.00E-11	Q96NP0_HUMAN	Hypothetical protein FLJ30449	1.00E-10			M
>CL1254	Q5C1T3_SCHJA	SJCHGC05060 protein (Fragment)	e-108	Q7QH57_ANOGA	ENSANGP00000011118 (Fragment)	1.00E-68	P79994_CHICK	DNA topoisomerase I	3.00E-68	TOP1_RAT	DNA topoisomerase I (EC 5.99.1.2)	1.00E-67	TOP1_CERAE	DNA topoisomerase I (EC 5.99.1.2)	1.00E-67			M
CD145825	Q8R512_RAT	Socius	0.68	Q4N9F8_THEPA	Hypothetical protein	0.89	Q4UGA9_THEAN	Ubiquitin regulatory protein, putative	0.89	UBXD1_HUMAN	UBX domain-containing protein 1	0.89	Q9D572_MOUSE	Adult male testis cDNA, RIKEN full-length enriched library, clone:4930506L07 pro	1.5			M
CONTIG9212	Q5C3W4_SCHJA	SJCHGC04404 protein (Fragment)	7.00E-26	Q5DBW0_SCHJA	SJCHGC05127 protein	0.088	Q4KLX1_XENLA	Hypothetical protein	6.3	Q8N1G5_HUMAN	Praja 2, RING-H2 motif containing	6.3	O43164_HUMAN	KIAA0438 protein (Fragment)	6.3			M
CONTIG10541	Q9V4B1_DROME	CG1651-PA, isoform A (Cg1651-pb, isoform b)	1.00E-17	Q24241_DROME	Ankyrin	1.00E-17	Q4T031_TETNG	Chromosome undetermined SCAF11373, whole genome shotgun sequence. (Fragment)	3.00E-17	Q4RT14_TETNG	Chromosome 12 SCAF14999, whole genome shotgun sequence. (Fragment)	4.00E-17	Q7Q172_ANOGA	ENSANGP00000013300 (Fragment)	4.00E-17			M
CD139954	Q4YWJ9_PLABE	Hypothetical protein (Fragment)	2.6	Q61K41_CAEBR	Hypothetical protein CBG09532	9.8	Q18769_CAEEL	Hypothetical protein srsx-29	9.8									M
CONTIG3176	Q26546_SCHMA	Carbonyl reductase-like protein trans-spliced	7.00E-59	Q5DEH8_SCHJA	SJCHGC00683 protein	1.00E-54	Q8JFQ8_PLEAT	Carbonyl reductase	5.00E-24	Q5PPZ0_XENLA	LOC496039 protein	9.00E-24	Q9PT38_ONCMY	Carbonyl reductase/20beta-hydroxysteroid dehydrogenase A	3.00E-23			M
CONTIG8335	Q7BQ95_SHIDY	InsA	2	Q327E5_SHIDY	Iso-IS1 ORF1	2	Q326W1_SHIDY	Iso-IS1 ORF1	2	Q9LA22_SHIDY	InsA	2	Q6E7C0_9UROC	Calcium transporter 2	2			M
CD131304	Q8IAZ6_PLAF7	Lipoamide dehydrogenase, putative (EC 1.8.1.4)	0.89	Q5VGY1_PLAFA	Dihydrolipoamide dehydrogenase (EC 1.8.1.4)	0.89	Q4F8J9_EUCGL	Putative alpha-expansin (Fragment)	5.8	Q39ZX6_PELCD	Transcriptional regulator, TetR family	9.8	Q93XR7_9ROSI	Fructose-6-phosphate 2-kinase/fructose-2,6-bisphosphatase	9.8			M
CD154008	Q54YH6_DICDI	Hypothetical protein	4.1															M
>CL1084																		M
CF499236	Q8T5G5_SCHJA	Polyprotein	8.00E-07	Q8MWP9_SCHJA	Polyprotein (Fragment)	8.00E-07	Q5DBA5_SCHJA	SJCHGC09144 protein	7.00E-06	Q3KZB4_SCHJA	SJCHGC02980 protein (Fragment)	0.24	Q59K46_CANAL	Likely vesicular transport factor Uso1p (Fragment)	2.6			M
CD191078	Q3UI41_MOUSE	16 days embryo kidney cDNA, RIKEN full-length enriched library, clone:I920161C13	2.00E-04	Q4TVN0_MOUSE	TBC1 domain family member 15	2.00E-04	Q7TPU5_MOUSE	TBC1 domain family, member 15	2.00E-04	TBC15_MOUSE	TBC1 domain family member 15	2.00E-04	Q5RFB1_PONPY	Hypothetical protein DKFZp469P1232	7.00E-04			M
CD141779	Q6GQC6_XENLA	MGC80163 protein	0.081	Q4PMC0_IXOSC	Ribosomal protein LP2	0.11	Q2YDN3_BOVIN	Ribosomal protein, large P2	0.14	Q6CKV3_KLULA	Kluyveromyces lactis strain NRRL Y-1140 chromosome F of strain NRRL Y-1140 of Kl	0.14	RLA2_BOVIN	60S acidic ribosomal protein P2	0.14			M
CONTIG8337	Q56JA3_ECHGR	Putative glucose phosphate isomerase (Fragment)	4.00E-30	G6PI_CALFI	Glucose-6-phosphate isomerase (EC 5.3.1.9) (GPI) (Phosphoglucose isomerase) (PGI	1.00E-27	Q8QFU7_9SAUR	Phosphoglucose isomerase (EC 5.3.1.9)	2.00E-27	Q8QFU6_9NEOB	Phosphoglucose isomerase (EC 5.3.1.9)	3.00E-27	Q9U1Q2_CAEEL	Glucose-6-phosphate isomerase (EC 5.3.1.9) (GPI) (PGI) (PHI) (Phosphoglucose iso	7.00E-27			M
Contig4497		SIMILAR TO C08B6.7 PROTEIN Q17818 (7E-14)	OM0023365-AOP															M
CD090137	Q9PU77_CRONI	Crocodylus niloticus putative ski oncogene, partial (Fragment)	0.41	Q9PU24_TRASC	Putative Ski oncogene protein (Fragment)	0.41	Q6NV61_MOUSE	Ski protein	0.41	Q5DU69_PIG	SKI protein (Fragment)	0.41	Q8MIA6_PIG	SKI protein (Fragment)	0.41			M
Contig6176		SIMILAR TO NEURABIN-I (NEURAL TISSUE-SPECIFIC F-ACTIN BINDING I) 3E-09 POSSIBLE	OM0023346-AOP															M
CD136752	Q5SSD5_HUMAN	Mitogen-activated protein kinase kinase kinase 6	0.41	Q75PK3_HUMAN	Apoptosis signal-regulating kinase 2	0.41	Q59HF4_HUMAN	Mitogen-activated protein kinase kinase kinase 6 variant (Fragment)	0.41	Q9WTR2_MOUSE	Apoptosis signal-regulating kinase 2	0.53	Q5RHC1_BRARE	Novel protein similar to vertebrate mitogen-activated protein kinase kinase kina	1.5			M
CD155205	Q25773_PLAFA	Asparagine-rich antigen (clone 37C3) (Fragment)	1.7	Q25770_PLAFA	Asparagine-rich antigen (clone 18C1) (Fragment)	1.7	Q2Z1X8_9EUKA	Alpha-tubulin (Fragment)	3.7	Q8II77_PLAF7	Hypothetical protein	8.2						M
Contig4595		SIMILAR TO URACIL-DNA-GLYCOSYLASE (1E-45) POSSIBLE ANTISENSE	OM0023354-AOP															M
Contig1829		UNKNOWN 852	OM0023327-AOP	ancient ubiquitous protein [Mus musculus]	ancient ubiquitous protein [Mus musculus]													M
CONTIG4485	Q5FIP8_LACAC	Surface protein	0.056	Q3N223_9DELT	Pyruvate decarboxylase:4Fe-4S ferredoxin, iron-sulfur binding (EC 1.2.7.8)	1	Q7X312_9BACT	Hypothetical protein	1.4	Q86JQ8_DICDI	Hypothetical protein	2.3	Q74JH9_LACJO	Hypothetical protein	4			M
Contig4260		SIMILAR TO ATP SYNTHASE GAMMA CHAIN, MITOCHONDRIAL PRECURSOR (EC 3.6.3.14) (2E-2	OM0023400-AOP															M
Contig4230		UNKNOWN 2683	OM0023400-AOP	hypothetical	hypothetical													M
CONTIG8550	O46220_9DIPT	Yolk polypeptide (Fragment)	3.4	O42390_CHICK	RGD-CAP	5.8	Q3UF50_MOUSE	2 days neonate sympathetic ganglion cDNA, RIKEN full-length enriched library, cl	5.8	CD2L5_MOUSE	Cell division cycle 2-like protein kinase 5 (EC 2.7.1.37) (CDC2-related protein	5.8	Q6R2K7_9MYCE	DtmA	7.6			M
CD197455	Q4Z6S2_PLABE	Cg1 protein, putative (Fragment)	5.9															M
Contig1834		UNKNOWN 855	OM0023327-AOP	similar to Leishmania major. Ppg3 [Dictyostelium discoideum]	similar to Leishmania major. Ppg3 [Dictyostelium discoideum]													M
Contig5663		UNKNOWN 3346	OM0023349-AOP															M
CONTIG3577	Q5XFX7_RAT	RAD23a homolog (S. cerevisiae) (Predicted)	0.31	Q8CAP3_MOUSE	16 days neonate thymus cDNA, RIKEN full-length enriched library, clone:A130094C1	0.91	Q8BRA9_MOUSE	9.5 days embryo parthenogenote cDNA, RIKEN full-length enriched library, clone:B	0.91	Q3TN85_MOUSE	Adult male kidney cDNA, RIKEN full-length enriched library, clone:F530010I04 pro	0.91	RD23A_MOUSE	UV excision repair protein RAD23 homolog A (mHR23A)	0.91			M
Contig2129		SIMILAR TO AQUAPORIN 3 (4E-05)	OM0023330-AOP															M
CONTIG8499	Q5L2M2_GEOKA	Hypothetical conserved protein	5.00E-13	Q58WG1_9SYLV	Recombination activating protein 1 (Fragment)	9.8	Q7TN44_RAT	MRGB5 G protein-coupled receptor	9.8	Q5NB23_ORYSA	Hypothetical protein P0511C01.38 (Hypothetical protein P0469E05.18)	9.8						M
CONTIG4248	Q5D9U8_SCHJA	SJCHGC06236 protein	5.00E-88	O62547_LOLPE	Sec1-like protein	5.00E-67	Q869G3_LYMST	Neural-specific syntaxin-binding protein 1	5.00E-66	Q6R748_CHICK	Syntaxin 1-binding protein	2.00E-62	Q5R6D2_PONPY	Hypothetical protein DKFZp459B217	2.00E-61			M
Contig7074		SIMILAR TO GLUCOSE TRANSPORT PROTEIN (9E-50)	OM0023379-AOP															M
Contig238		S. MANSONI AUT1 CONTAINING NUCLEAR RNA BINDING DOMAIN (POSSIBLE ANTISENSE)	OM0023341-AOP															M
CONTIG6594	Q8MUR6_SCHJA	IB1 protein	5.00E-26	Q5DHE4_SCHJA	SJCHGC04453 protein	1.00E-25	Q8MPF1_TAESO	Hypothetical protein	3.00E-23	Q5C390_SCHJA	SJCHGC03707 protein (Fragment)	5.00E-23	Q5DCV7_SCHJA	SJCHGC03072 protein	2.00E-22			M
CD111801	Q5C5I6_SCHJA	SJCHGC07199 protein (Fragment)	2.00E-09															M
Contig6931		UNKNOWN 4342	OM0011068-NOP	Required for invasion and pseudohyphae formation in response to nitrogen starvat	Required for invasion and pseudohyphae formation in response to nitrogen starvat													M
SMLC25B04	Q6WL04_APIME	Hyperpolarization-activated ion channel	1.00E-08	Q5XQT6_APIME	Hyperpolarization-activated ion channel variant L	1.00E-08	Q5XQT5_APIME	Hyperpolarization-activated ion channel variant T	1.00E-08	O96777_HELVI	Cyclic nucleotide and voltage-activated ion channel	1.00E-08	Q9V702_DROME	CG8585-PA	3.00E-08			M
CD169659	Q4SG95_TETNG	Chromosome 17 SCAF14597, whole genome shotgun sequence. (Fragment)	0.31	Q32PY0_RAT	Hypothetical protein (Fragment)	0.53	Q562B3_RAT	Nckap1 protein (Fragment)	0.53	Q53Y35_HUMAN	NCK-associated protein 1	0.53	Q53QN5_HUMAN	Hypothetical protein NCKAP1 (Fragment)	0.53			M
>CL850																		M
CONTIG10139	Q8T148_DICDI	Similar to Dictyostelium discoideum (Slime mold). Homeobox-containing protein (	6.00E-04	Q559L2_DICDI	Hypothetical protein	0.001	Q7KWV9_DICDI	Similar to Dictyostelium discoideum (Slime mold). Prespore-specific protein	0.001	Q552K7_DICDI	Hypothetical protein	0.001	Q54NT7_DICDI	AAC-rich mRNA	0.002			M
CONTIG3965	Q5DC73_SCHJA	SJCHGC09552 protein	2.00E-08	Q4QQF0_SCHMA	Hypothetical protein	0.53	Q60MB4_CAEBR	Hypothetical protein CBG23225	3.4	Q8YWG6_ANASP	Peptide synthetase	5.9	Q531A8_PEA	FCA gamma	10			M
CD072606	Q5C1D2_SCHJA	SJCHGC03254 protein (Fragment)	1.00E-18	Q4RKT5_TETNG	Chromosome 1 SCAF15025, whole genome shotgun sequence. (Fragment)	1.00E-04	Q2YDQ5_BRARE	Hypothetical protein (Fragment)	2.00E-04	Q9V605_DROME	CG9003-PA	3.00E-04	Q5BI22_DROME	LD12638p	3.00E-04			M
CD136023	LEF9_NPVOP	Late expression factor 9	0.012	Q60U38_CAEBR	Hypothetical protein CBG20190	0.021	Q18325_CAEEL	Hypothetical protein unc-103 (HERG-like potassium channel)	0.021	Q4SKI4_TETNG	Chromosome undetermined SCAF14565, whole genome shotgun sequence. (Fragment)	0.4	Q4YSM1_PLABE	Hypothetical protein (Fragment)	0.4			M
CD160504	Q6MZZ3_HUMAN	Hypothetical protein DKFZp686I0746	6.00E-17	Q6IQ37_HUMAN	DCTN1 protein	6.00E-17	Q6AWB1_HUMAN	Hypothetical protein DKFZp686E0752	6.00E-17	O95654_HUMAN	P150Glued homolog (Fragment)	6.00E-17	DYNA_HUMAN	Dynactin-1 (150 kDa dynein-associated polypeptide) (DP-150) (DAP-150) (p150-glu	6.00E-17			M
CD117051	Q4XXA5_PLACH	Hypothetical protein (Fragment)	0.11	Q8IL35_PLAF7	Hypothetical protein	0.23	Q4X3N5_PLACH	Hypothetical protein (Fragment)	0.68	Q7RKM9_PLAYO	Hypothetical protein	1.2	Q8I1R3_PLAF7	Hypothetical protein PFD0845w	1.2			M
CONTIG2166	Q8AVY2_XENLA	MGC52676 protein	e-125	Q6DI44_BRARE	Ribonucleotide reductase M2 polypeptide	e-125	RIR2_BRARE	Ribonucleoside-diphosphate reductase M2 subunit (EC 1.17.4.1) (Ribonucleotide r	e-125	RIR2_RAT	Ribonucleoside-diphosphate reductase M2 subunit (EC 1.17.4.1) (Ribonucleotide r	e-125	Q95VP8_AEDAE	Ribonucleotide reductase 2	e-125			M
Contig6004		UNKNOWN 3580	OM0023350-AOP	Protein farnesyltransferase alpha subunit (CAAX farnesyltransferase alpha subuni	Protein farnesyltransferase alpha subunit (CAAX farnesyltransferase alpha subuni													M
CONTIG10329	Q5DDB1_SCHJA	SJCHGC02298 protein	7.00E-83	Q6DFL5_XENLA	Fmip-prov protein	2.00E-31	Q5ZJK1_CHICK	Hypothetical protein	1.00E-30	Q7ZXA8_XENLA	Fmip-prov protein	2.00E-30	Q8BKT7_MOUSE	9 days embryo whole body cDNA, RIKEN full-length enriched library, clone:D030012	3.00E-30			M
Contig3405		SIMILAR TO BETA-ACTIN (2E-24)	OM0023364-AOP															M
Contig392		UNKNOWN 214	OM0023399-AOP															M
AF056330		SCHISTOSOMA MANSONI AUT1 (AUT1) MRNA, COMPLETE CDS	OM0023326-AOP															M
CD093886	HCFC1_HUMAN	Host cell factor (HCF) (HCF-1) (C1 factor) (VP16 accessory protein) (VCAF) (CFF)	1.00E-49	HCFC1_MOUSE	Host cell factor (HCF) (HCF-1) (C1 factor) [Contains: HCF N-terminal chain 1; HC	2.00E-49	HCFC1_MESAU	Host cell factor (HCF) (HCF-1) (C1 factor) (VP16 accessory protein) (VCAF) [Cont	2.00E-49	Q5TPR3_ANOGA	ENSANGP00000026655 (Fragment)	3.00E-48	Q7Q2R1_ANOGA	ENSANGP00000003420 (Fragment)	3.00E-48			M
SMLC28B08	Q5AYV1_EMENI	Hypothetical protein	4.5															M
CONTIG7059	RS23_DERVA	40S ribosomal protein S23	5.00E-32	RS23_LUMRU	40S ribosomal protein S23	1.00E-31	Q5DBM8_SCHJA	SJCHGC02768 protein	1.00E-31	Q61Z05_CAEBR	Hypothetical protein CBG03324	2.00E-31	RS23_CAEEL	40S ribosomal protein S23	2.00E-31			M
CONTIG4109	Q5L172_GEOKA	2-oxoglutarate dehydrogenase complex E1 component (EC 1.2.4.2)	1.00E-27	ODO1_BACSU	2-oxoglutarate dehydrogenase E1 component (EC 1.2.4.2) (Alpha-ketoglutarate dehy	1.00E-27	Q9KAT1_BACHD	Oxoglutarate dehydrogenase	9.00E-25	Q65IH4_BACLD	OdhA (2-oxoglutarate dehydrogenase) (E1 subunit)	9.00E-25	Q5WG56_BACSK	2-oxoglutarate dehydrogenase E1 component (EC 1.2.4.2)	4.00E-23			M
Contig590		SIMILAR TO PYRUVATE DEHYDROGENASE E1 COMPONENT ALPHA SUBUNIT TYPE 1, MITOCHONDRI	OM0023348-AOP															M
CD149172	Q5DCF4_SCHJA	SJCHGC06833 protein	6.00E-34	Q4VBH9_BRARE	LOC568867 protein (Fragment)	1.00E-10	Q9DBS2_MOUSE	Adult male lung cDNA, RIKEN full-length enriched library, clone:1200015A19 produ	2.00E-10	Q32LJ4_BOVIN	Hypothetical protein	2.00E-10	Q6ZUI0_HUMAN	Hypothetical protein FLJ43694 (Hypothetical protein FLJ41238)	2.00E-10			M
CONTIG12341	Q5BXC3_SCHJA	SJCHGC06167 protein (Fragment)	1.00E-60	Q5BZG4_SCHJA	SJCHGC03112 protein (Fragment)	2.00E-21	Q6PHE9_BRARE	RAD23 homolog B	3.00E-19	Q7LZR8_ICTPU	RAD 23B protein	2.00E-18	Q6TLD0_BRARE	RAD23 homolog B	3.00E-18			M
CONTIG6575	Q9N504_CAEEL	Hypothetical protein C33E10.6	0.11	Q8IHQ0_PLAF7	Hypothetical protein	0.25	Q8IE49_PLAF7	DNA-directed RNA polymerase 3 largest subunit (EC 2.7.7.6)	0.42	RPC1_PLAFA	DNA-directed RNA polymerase III largest subunit (EC 2.7.7.6)	0.55	Q9YVK9_MSEPV	ORF MSV234 hypthetical protein	0.71			M
CONTIG6770	Q4RQS2_TETNG	Chromosome 2 SCAF15004, whole genome shotgun sequence	5.00E-50	Q9D9Y2_MOUSE	Adult male testis cDNA, RIKEN full-length enriched library, clone:1700025I19 pro	5.00E-50	Q5FW91_MOUSE	Tubulin, alpha 3 (Adult male testis cDNA, RIKEN full-length enriched library, cl	5.00E-50	Q4R4C4_MACFA	Testis cDNA clone: QtsA-11061, similar to human alpha-tubulin isotype H2-alpha (	5.00E-50	Q7PSI5_ANOGA	ENSANGP00000002667 (Fragment)	5.00E-50			M
CONTIG2214	Q9U8D5_ECHGR	EF-1 (Fragment)	2.00E-34	Q5SPC9_BRARE	Novel protein similar to vertebrate eukaryotic translation elongation factor 1	3.00E-34	Q5SPD1_BRARE	Novel protein similar to vertebrate eukaryotic translation elongation factor 1 d	4.00E-34	Q9NGP3_ECHGR	EF-1 (Fragment)	4.00E-34	Q9BPS1_BOMMO	Elongation factor 1 delta	6.00E-32			M
CONTIG10094	Q5DI18_SCHJA	SJCHGC02266 protein	0	Q6TU32_APLCA	PKA type II regulatory subunit	e-100	Q6ZXJ1_APICA	CAMP-dependent protein kinase type II regulatory chain	6.00E-97	Q7PPI8_ANOGA	ENSANGP00000022232	7.00E-96	Q25114_HEMPU	Regulatory subunit of cAMP-dependent histone kinase	4.00E-94			M
Contig537		UNKNOWN 290 POSSIBLE ANTISENSE	OM0023382-AOP	Similar to WD40 protein Ciao1 [Danio rerio]	Similar to WD40 protein Ciao1 [Danio rerio]													M
Contig4579		SIMILAR TO INSULIN-INDUCED PROTEIN 1 (INSULIN-INDUCED GROWTH RESPONSE PROTEIN CL	OM0023354-AOP															M
CONTIG7352																		M
CONTIG2181	Q86FI5_SCHJA	Clone ZZD84 mRNA sequence	e-144	Q7ZX29_XENLA	Dia1-prov protein	3.00E-83	Q9UHJ1_HUMAN	Cytochrome b5 reductase 1	4.00E-81	NCB5R_BOVIN	NADH-cytochrome b5 reductase (EC 1.6.2.2) (B5R) (Diaphorase-1) (Cytochrome b5 r	9.00E-81	Q9UHQ9_HUMAN	NADH-cytochrome b5 reductase isoform (NAD(P)H:quinone oxidoreductase type 3, po	1.00E-80			M
Contig5234d																		M
CD111167	Q86E83_SCHJA	Clone ZZD819 mRNA sequence	3.00E-25	Q5C3V3_SCHJA	SJCHGC05011 protein (Fragment)	2.00E-14	Q7QCQ5_ANOGA	ENSANGP00000022161 (Fragment)	4.00E-09	Q58DJ8_BOVIN	Chaperonin containing TCP1, subunit 3 (Gamma)	3.00E-08	Q3T0K2_BOVIN	Hypothetical protein	3.00E-08			M
CD080042	Q9H9D2_HUMAN	Hypothetical protein FLJ12838	1.00E-42	Q7Z3V7_HUMAN	Hypothetical protein DKFZp686O24118 (Fragment)	1.00E-42	Q6MZV0_HUMAN	Hypothetical protein DKFZp686H2266 (Endomannosidase)	1.00E-42	Q5SRI9_HUMAN	Mannosidase, endo-alpha	1.00E-42	Q70JE9_HUMAN	Glycoprotein endo-alpha-1,2-mannosidase (EC 3.2.1.130) (Fragment)	1.00E-42			M
Contig3863		SIMILAR TO PROTEIN-S ISOPRENYLCYSTEINE O-METHYLTRANSFERASE (4E-42) POSSIBLE ANTI	OM0023399-AOP															M
CD073170	Q5D8I8_SCHJA	SJCHGC06337 protein	5.00E-12	Q5D8T5_SCHJA	SJCHGC01525 protein	2.00E-09	Q5DG94_SCHJA	Hypothetical protein	3.00E-09	Q5DF46_SCHJA	SJCHGC09377 protein	2.00E-07	Q75QV9_CIOIN	17-beta hydroxysteroid dehydrogenase (Fragment)	4.00E-06			M
Contig1760		UNKNOWN 825	OM0023329-AOP	Similar to splicing factor, arginine/serine-rich 6 [Xenopus laevis]	Similar to splicing factor, arginine/serine-rich 6 [Xenopus laevis]													M
SMLC6B03	Q388V1_9TRYP	Hypothetical protein	0.014	Q4QDS8_LEIMA	Hypothetical protein	0.071	Q4SYI1_TETNG	Chromosome undetermined SCAF12054, whole genome shotgun sequence. (Fragment)	0.46	Q4S1A0_TETNG	Chromosome 13 SCAF14769, whole genome shotgun sequence	0.46	Q55C43_DICDI	Hypothetical protein	0.46			M
CD135733	Q9ICE3_9VIRU	Non-structural protein	0.063	Q9J956_9VIRU	Non-structural protein	0.082	Q64FS9_9VIRU	Non-structural protein	0.082	Q9ICD9_9VIRU	Non-structural protein	0.14	Q9ICD8_9VIRU	Non-structural protein	0.14			M
Contig3944		UNKNOWN 2522	OM0023398-AOP	protein kinase, AMP-activated, beta 2 non-catalytic subunit [Mus musculus]	protein kinase, AMP-activated, beta 2 non-catalytic subunit [Mus musculus]													M
CD127948	YCX8_ASTLO	Hypothetical 15.7 kDa protein in rpl14-rpl12 intergenic region (ORF125b)	7.6															M
CD196929	Q4YSD1_PLABE	Hypothetical protein (Fragment)	7.6															M
CONTIG7227	Q8IB38_PLAF7	Hypothetical protein PF08_0047	0.32	Q4N8X8_THEPA	Hypothetical protein	0.55	Q8II21_PLAF7	Hypothetical protein	1.2	Q4YB78_PLABE	Hypothetical protein	1.6	Q8IB83_PLAF7	Hypothetical protein PF08_0027	1.6			M
CD090130	Q5DDV5_SCHJA	Hypothetical protein	1.00E-59	ENO_SCHJA	Enolase (EC 4.2.1.11) (2-phosphoglycerate dehydratase) (2-phospho-D-glycerate hy	1.00E-59	Q6A4N1_CAEEL	Enolase (EC 4.2.1.11) (2-phospho-D-glycerate hydro-lyase)	2.00E-59	ENO_CAEEL	Enolase (EC 4.2.1.11) (2-phosphoglycerate dehydratase) (2-phospho-D-glycerate hy	2.00E-59	Q61Z94_CAEBR	Hypothetical protein CBG03214	2.00E-59			M
CONTIG11035	Q6CQE6_KLULA	Kluyveromyces lactis strain NRRL Y-1140 chromosome D of strain NRRL Y-1140 of Kl	1.00E-14	Q6CQF4_KLULA	Kluyveromyces lactis strain NRRL Y-1140 chromosome D of strain NRRL Y-1140 of Kl	2.00E-11	Q99JC0_RAT	RRNA promoter binding protein	8.00E-07	O04892_TOBAC	Cytochrome P450 like_TBP (EC 1.14.14.1)	2.00E-04	Q6T4Q1_PYRCO	Cytochrome P450 monooxygenase (Fragment)	4.00E-04			M
SMLA43C12																		M
CD128950	ITPR_DROME	Inositol 1,4,5-trisphosphate receptor (InsP3 receptor) (InsP3R)	3.00E-10	ITPR2_HUMAN	Inositol 1,4,5-trisphosphate receptor type 2 (Type 2 inositol 1,4,5-trisphospha	5.00E-10	ITPR2_BOVIN	Inositol 1,4,5-trisphosphate receptor type 2 (Type 2 inositol 1,4,5-trisphospha	5.00E-10	ITPR3_RAT	Inositol 1,4,5-trisphosphate receptor type 3 (Type 3 inositol 1,4,5-trisphospha	6.00E-10	Q4RY06_TETNG	Chromosome 11 SCAF14979, whole genome shotgun sequence	8.00E-10			M
CONTIG7067	Q86EJ0_SCHJA	Clone ZZD324 mRNA sequence	2.00E-60	Q5C165_SCHJA	SJCHGC05221 protein (Fragment)	0.009	Q86RB4_SCHJA	Gynecophoral canal protein	0.009	Q54CU9_DICDI	Hypothetical protein	0.4	Q5WGA7_BACSK	ATP-dependent DNA helicase DinG	2			M
Contig6458		UNKNOWN 3946	OM0023371-AOP															M
CONTIG7089	Q23215_CAEEL	Hypothetical protein	5.00E-26	Q9VAH7_DROME	CG1973-PA	8.00E-26	Q61KA9_CAEBR	Hypothetical protein CBG09451	2.00E-25	Q5M9F8_RAT	SCY1-like 1 (S. cerevisiae) (Predicted)	6.00E-24	Q9HAW5_HUMAN	Telomerase regulation-associated protein	4.00E-23			M
SMLA63H10																		M
CONTIG4234	Q5C4E0_SCHJA	SJCHGC04077 protein (Fragment)	5.00E-32	Q8IEF3_PLAF7	Hypothetical protein Phat190	0.086	Q4XXX4_PLACH	ATP-dependent DNA helicase, putative	1.6	Q7NXI2_CHRVO	Linoleoyl-CoA desaturase (EC 1.14.19.3)	6.2	Q5NI10_FRATT	Cytochrome O ubiquinol oxidase subunit I (EC 1.10.3.-)	8.1			M
Contig4540		SIMILAR TO HISTIDINE TRIAD PROTEIN MEMBER 5 (2E-10) POSSIBLE ANTISENSE	OM0023365-AOP															M
CONTIG1540	Q5DB97_SCHJA	SJCHGC08394 protein	4.00E-39	Q921C3_MOUSE	WDR9 protein, form A	6.00E-17	Q921C2_MOUSE	WDR protein, form B	6.00E-17	Q5R2V1_HUMAN	WD repeat protein	1.00E-16	Q5R2V0_HUMAN	WD repeat protein WDR9-form2	1.00E-16			M
SMLC26A05	Q5DA15_SCHJA	SJCHGC06764 protein	4.00E-07	Q90ZB3_XENLA	Rho-GDI like protein	1.00E-05	Q7SZS5_XENLA	MGC69119 protein	1.00E-05	Q68F32_XENLA	MGC81977 protein	1.00E-05	Q3ZCK4_BOVIN	Rho GDP dissociation inhibitor (GDI) beta	2.00E-05			M
>CL1180																		M
CONTIG4971	Q5DA03_SCHJA	SJCHGC09193 protein	4.00E-29	Q86F86_SCHJA	Clone ZZD10 mRNA sequence	2.00E-26	Q5DHX7_SCHJA	SJCHGC01569 protein	4.00E-26	Q5DI27_SCHJA	SJCHGC06484 protein	3.00E-25	Q5DEN9_SCHJA	SJCHGC01839 protein	5.00E-24			M
SMU39883		SCHISTOSOMA MANSONI Y-BOX BINDING PROTEIN MRNA, COMPLETE CDS	OM0023337-AOP															M
Contig611		UNKNOWN 331 POSSIBLE ANTISENSE	OM0023345-AOP	CG6404-PB [Drosophila melanogaster]	CG6404-PB [Drosophila melanogaster]													M
CONTIG1946	Q967W1_SCHMA	Ca-ATPase-like protein SMA3	0	Q3Y9I7_STRPU	Testis secretory pathway calcium transporting ATPase	0	Q9VNR2_DROME	CG32451-PA, isoform A	0	Q8IPS6_DROME	CG32451-PC, isoform C	0	Q7KTU2_DROME	CG32451-PB, isoform B	0			M
CD092014	Q5D944_SCHJA	SJCHGC09280 protein	2.00E-40	Q7ZVY9_BRARE	Karyopherin alpha 4 (Importin alpha 3)	1.00E-21	Q6PUQ6_BRARE	Karyopherin alpha 4	1.00E-21	Q71VM5_HYDAT	Importin alpha-3 subunit	2.00E-21	Q5ZLF7_CHICK	Hypothetical protein	3.00E-21			M
CONTIG9326	Q5BWC6_SCHJA	SJCHGC07987 protein (Fragment)	1.00E-24	Q66580_EEEV	Eastern Equine Encephalomyelitis Virus RNA sequence	0.1	Q5XZF4_EEEV	Nonstructural protein	0.17	Q4QXK0_EEEV	Nonstructural protein	0.17	Q4QXJ8_EEEV	Nonstructural protein	0.17			M
AF031034		SCHISTOSOMA MANSONI TRYPTOPHAN HYDROXYLASE (TPH) MRNA, COMPLETE CDS [POLY-A TAIL	OM0023326-AOP															M
Contig5923		UNKNOWN 3522	OM0023348-AOP															M
CONTIG7622	Q5U3F2_BRARE	Zgc:103640	e-105	Q96FM9_HUMAN	Step II splicing factor SLU7	e-105	O95391_HUMAN	Step II splicing factor SLU7	e-105	Q8BHJ9_MOUSE	10 days neonate skin cDNA, RIKEN full-length enriched library, clone:4732493P06	e-105	Q3KQQ3_MOUSE	Hypothetical protein (Fragment)	e-105			M
CONTIG11298	Q7ZVT5_BRARE	Hypothetical protein zgc:55665	4.00E-13	Q4SEY7_TETNG	Chromosome undetermined SCAF14610, whole genome shotgun sequence. (Fragment)	6.00E-13	Q52KY9_XENLA	Hypothetical protein (Fragment)	4.00E-11	Q9GZN7_HUMAN	Hypothetical protein DKFZp564M1672 (Leucine zipper domain protein) (Hypothetical	4.00E-11	Q3B8C1_XENLA	Hypothetical protein (Fragment)	7.00E-11			M
SMLA60A03																		M
CD080261	Q5DG09_SCHJA	SJCHGC06310 protein	e-106	Q5DGP9_SCHJA	SJCHGC08973 protein	9.00E-16	Q86EZ0_SCHJA	Clone ZZD128 mRNA sequence	4.00E-15	Q3TJ42_MOUSE	12 days pregnant adult female placenta cDNA, RIKEN full-length enriched library,	4.00E-08	GAPR1_MOUSE	Golgi-associated plant pathogenesis-related protein 1 (Golgi-associated PR-1 pro	4.00E-08			M
Contig2061		UNKNOWN 999	OM0023330-AOP	Nucleolin (Protein C23) (sp|NUCL_XENLA)	Nucleolin (Protein C23) (sp|NUCL_XENLA)													M
CD201565	Q9Z7Z7_CHLPN	Tail-specific protease, putative	0.14	Q7VPY3_CHLPN	Carboxy-terminal proteinase	0.14	Q974V4_SULTO	525aa long hypothetical GTP-binding protein	1.6	MPDZ_MOUSE	Multiple PDZ domain protein (Multi PDZ domain protein 1) (Multi-PDZ domain prot	2.1	Q4LE30_HUMAN	MPDZ variant protein (Fragment)	2.7			M
Contig3303		UNKNOWN 2004	OM0023396-AOP															M
CD083820	Q6CVX5_KLULA	Similar to sgd|S0005415 Saccharomyces cerevisiae YOL054w	2.00E-05	Q6FQ13_CANGA	Similar to tr|Q12161 Saccharomyces cerevisiae YOL054w	8.00E-05	Q4WNF5_ASPFU	SNF2 family helicase/ATPase, putative	5.00E-04	Q4DYQ0_TRYCR	Hypothetical protein	0.001	Q19214_CAEEL	Hypothetical protein	0.003			M
CONTIG2698	Q5DHQ9_SCHJA	SJCHGC05720 protein	5.00E-77	Q4RIR8_TETNG	Chromosome 7 SCAF15042, whole genome shotgun sequence. (Fragment)	4.00E-36	Q66KA5_XENTR	MGC89839 protein	6.00E-36	Q6TNQ6_BRARE	Golgi membrane protein SB140	2.00E-35	Q6P5I8_BRARE	Zgc:56513 protein	2.00E-35			M
Contig6941		UNKNOWN 4351	OM0023380-AOP	agCP10771 [Anopheles gambiae str. PEST]	agCP10771 [Anopheles gambiae str. PEST]													M
CONTIG6638	Q5DED7_SCHJA	SJCHGC04946 protein	8.00E-37	Q3T0C5_BOVIN	Hypothetical protein	1.00E-14	ATP5L_BOVIN	ATP synthase g chain, mitochondrial (EC 3.6.3.14) (ATPase subunit G)	1.00E-14	Q9D037_MOUSE	10 days embryo whole body cDNA, RIKEN full-length enriched library, clone:261011	2.00E-14	Q9CQY3_MOUSE	Adult male small intestine cDNA, RIKEN full-length enriched library, clone:20100	2.00E-14			M
SMLA12A04	Q7RI39_PLAYO	Amine oxidase, flavin-containing, putative (Fragment)	7.00E-04	Q4XNH7_PLACH	Hypothetical protein (Fragment)	0.002	Q8I5T5_PLAF7	Hypothetical protein	0.002	Q7XR46_ORYSA	OSJNBa0043A12.39 protein	0.006	Q7XPI8_ORYSA	OSJNBb0004A17.1 protein	0.023			M
CONTIG4032	Q54BK4_DICDI	Hypothetical protein	0.027	Q54DV9_DICDI	Hypothetical protein	0.08	Q4S7K5_TETNG	Chromosome 13 SCAF14715, whole genome shotgun sequence. (Fragment)	0.14	Q5PRC8_BRARE	Zgc:101641	0.18	Q55FI2_DICDI	Hypothetical protein	0.18			M
Contig1761		UNKNOWN 826	OM0023329-AOP															M
CD145663	Q8SXP0_DROME	GH19076p (CG8709-PA)	0.002	Q6PCJ8_XENLA	MGC68897 protein	0.036	Q4XZE5_PLACH	Phosphatidylinositol 4-kinase, putative (Fragment)	0.047	Q4Y3Y4_PLACH	Hypothetical protein (Fragment)	0.08	Q75JA1_DICDI	Hypothetical protein	0.08			M
CD190756	Q449V9_SOLUS	Hypothetical protein precursor	9.6															M
CONTIG8930	Q74ZA7_ASHGO	AGR296Wp	6.3															M
CD192150																		M
Contig1191		SIMILAR TO ENDOPLASMIN (1E-133)	OM0023357-AOP															M
CF502046	Q3T2M8_STAAU	Hypothetical protein	5.1															M
CONTIG9084	Q5ZMQ1_CHICK	Hypothetical protein	3.00E-65	Q5BJW0_RAT	RGD1305984_predicted protein (Fragment)	6.00E-65	Q91YT4_MOUSE	Skiv2l2 protein (Fragment)	1.00E-64	Q8BTX6_MOUSE	2 days neonate thymus thymic cells cDNA, RIKEN full-length enriched library, cl	1.00E-64	Q499Q9_RAT	RGD1305984_predicted protein	1.00E-64			M
CD144916	Q4HP57_CAMUP	Ribbon-helix-helix protein, copG family domain protein	0.56	Q7VJJ1_HELHP	Hypothetical protein	1.2	Q49XT6_STAS1	Hypothetical protein	1.6	Q6CS61_KLULA	Similar to sgd|S0005433 Saccharomyces cerevisiae YOL072w THP1	2.1	Q8V3K0_SWPV	SPV096 putative intermediate transcription factor VITF-3	3.6			M
SMLA48C08	Q5BYH1_SCHJA	SJCHGC09303 protein (Fragment)	4.00E-21	Q8LLI7_DESAN	Putative pyruvate kinase (Fragment)	2.9	Q7U617_SYNPX	Putative sulfate transporter precursor	6.4	TCB1_RABIT	T-cell receptor beta chain ANA 11	8.4						M
CD188836	Q8NJ19_MUCCI	Solanesyl pyrophosphate synthase (EC 2.5.1.11)	2.00E-16	Q4S1K9_TETNG	Chromosome 6 SCAF14768, whole genome shotgun sequence	4.00E-16	Q567H1_BRARE	Hypothetical protein zgc:112058	6.00E-16	Q5T2R2_HUMAN	Trans-prenyltransferase (TPT) (Subunit 1 of decaprenyl diphosphate synthase)	2.00E-15	Q86WQ8_HUMAN	TPRT protein (Fragment)	2.00E-15			M
CD066647	Q7PX10_ANOGA	ENSANGP00000004133 (Fragment)	3.00E-05	Q8CHF3_MOUSE	MKIAA0462 protein (Fragment)	6.00E-05	Q8TDN5_HUMAN	P600	6.00E-05	Q5T4S9_HUMAN	Retinoblastoma-associated factor 600 (RBAF600) (Fragment)	6.00E-05	Q5T4S8_HUMAN	Retinoblastoma-associated factor 600 (RBAF600) (Fragment)	6.00E-05			M
CD137040																		M
CD123128																		M
Contig15		UNKNOWN 8	OM0023375-AOP	calponin homolog [Schistosoma mansoni]	calponin homolog [Schistosoma mansoni]													M
Contig6103		SIMILAR TO POLYPROTEIN (1E-06)	OM0023345-AOP															M
CD127537	Q502J3_BRARE	LOC553455 protein (Fragment)	6.00E-14	Q4R823_MACFA	Testis cDNA clone: QtsA-13722, similar to human amplified in osteosarcoma (OS-9)	2.00E-13	Q5RB74_PONPY	Hypothetical protein DKFZp469P1939	2.00E-13	Q9BW99_HUMAN	Amplified in osteosarcoma, isoform 2	2.00E-13	Q6IBL2_HUMAN	OS-9 protein	2.00E-13			M
CD178916	Q4RKE9_TETNG	Chromosome 21 SCAF15029, whole genome shotgun sequence. (Fragment)	1.00E-13	Q5ZMQ6_CHICK	Hypothetical protein	1.00E-13	Q3V091_MOUSE	Adult male testis cDNA, RIKEN full-length enriched library, clone:4932441G13 pro	2.00E-13	Q3U457_MOUSE	NOD-derived CD11c +ve dendritic cells cDNA, RIKEN full-length enriched library,	2.00E-13	Q3TCG6_MOUSE	NOD-derived CD11c +ve dendritic cells cDNA, RIKEN full-length enriched library,	2.00E-13			M
CD132492	Q5CHM9_CRYHO	SNF2 family N-terminal domain	0.68	Q5CVC2_CRYPV	ISWI related chromatinic protein with an apicomplexan specific domain architectu	0.68	Q3E5J3_CHLAU	Zn-binding protein, LIM	4.4	Q4SC22_TETNG	Chromosome 14 SCAF14660, whole genome shotgun sequence. (Fragment)	5.7	Q891E6_CLOTE	Conserved protein	7.5			M
CONTIG11398	Q26579_SCHMA	Glucose transport protein	0	Q27072_TAESO	TGTP1	e-137	Q26581_SCHMA	Glucose transport protein	e-129	Q5C181_SCHJA	SJCHGC06671 protein (Fragment)	e-101	Q5C186_SCHJA	Hypothetical protein	2.00E-66			M
CONTIG2739	Q5DFH8_SCHJA	SJCHGC06606 protein	e-124	Q7ZYU6_XENLA	MGC52685 protein	6.00E-50	Q8AVG8_XENLA	Ca2-prov protein	2.00E-48	Q7TPE1_MOUSE	Carbonic anhydrase 2	5.00E-47	Q5FW20_XENTR	MGC107879 protein	8.00E-47			M
Contig3718		UNKNOWN 2372	OM0023360-AOP															M
Contig5158		UNKNOWN 3008	OM0023356-AOP	low density lipoprotein-receptor related protein [Schistosoma mansoni]	low density lipoprotein-receptor related protein [Schistosoma mansoni]													M
CD117804																		M
CD082954	Q8ILY2_PLAF7	Hypothetical protein	0.069	Q7RGG0_PLAYO	Fimbriae-associated protein Fap1 (Fragment)	1.3	Q4P4Y7_USTMA	Hypothetical protein	1.3	Q5R8P8_PONPY	Hypothetical protein DKFZp469B186	2.2	Q4C462_CROWT	Hypothetical protein (EC 2.1.1.33)	2.9			M
CONTIG11235	Q6V9T3_SCHMA	Heat shock transcription factor (Fragment)	3.00E-83	O46359_SCHMA	Heat shock transcription factor	5.00E-75	O44944_SCHMA	Heat shock transcription factor	5.00E-75	O44943_SCHMA	Heat shock transcription factor	5.00E-75	O44942_SCHMA	Heat shock transcription factor (Fragment)	1.00E-73			M
Contig1505		UNKNOWN 716	OM0023375-AOP	unnamed protein product [Mus musculus]	unnamed protein product [Mus musculus]													M
Contig21		UNKNOWN 13	OM0023330-AOP	hypothetical	hypothetical													M
CD093885	Q4PE03_USTMA	Hypothetical protein	2	EMSY_HUMAN	Protein EMSY	2.6	Q9SN70_ARATH	Hypothetical protein F24J7.161 (Hypothetical protein AT4g19600)	4.5	Q7N9K8_PHOLL	Hemolysin PhlA	7.7	Q8VMR0_PHOLU	PhlA protein	7.7			M
CD158310	Q8EKM6_SHEON	Hypothetical protein SO0066	2.00E-17	Q3Q9J0_9GAMM	Alpha-2-macroglobulin, N-terminal precursor	2.00E-14	Q45DC2_9BURK	Alpha-2-macroglobulin, N-terminal:Alpha-2-macroglobulin, N-terminal	2.00E-10	Q4LWX4_9BURK	Alpha-2-macroglobulin, N-terminal:Alpha-2-macroglobulin, N-terminal	2.00E-10	Q39A89_9BURK	Alpha-2-macroglobulin-like large extracellular alpha-helical protein	6.00E-10			M
CD062267	Q4T7V9_TETNG	Chromosome undetermined SCAF7971, whole genome shotgun sequence. (Fragment)	1.2	Q5HZF7_XENLA	MSH2 protein (Fragment)	1.2	Q803R6_BRARE	MutS homolog 2	1.5	Q90XA7_BRARE	Mismatch repair protein Msh2	1.5	MSH2_RAT	DNA mismatch repair protein Msh2 (MutS protein homolog 2)	2			M
CONTIG10570	Q7PRJ8_ANOGA	ENSANGP00000016048	2.00E-47	Q4S8Q6_TETNG	Chromosome 7 SCAF14703, whole genome shotgun sequence. (Fragment)	1.00E-40	Q5WQV5_RAT	Radixin	1.00E-40	RADI_CHICK	Radixin	1.00E-40	MERH_DROME	Moesin/ezrin/radixin homolog 2 (Ezrin-moesin-radixin-2) (Merlin protein) (dMerl	2.00E-40			M
CONTIG11003	Q4QQE2_SCHMA	Endonuclease-reverse transcriptase	1.00E-22	Q4QQE4_SCHMA	Endonuclease-reverse transcriptase	6.00E-14	Q4QQE9_SCHMA	Endonuclease-reverse transcriptase	5.00E-09	Q90811_CHICK	Hypothetical protein VTGIII (Fragment)	0.001	O18520_SCHMA	Pol (Fragment)	0.001			M
Contig6120		UNKNOWN 3657	OM0023345-AOP															M
CD189391	O17460_SCHMA	Hypothetical protein	8.00E-58	O17459_SCHMA	Hypothetical protein (Fragment)	8.00E-58	Q5DB37_SCHJA	SJCHGC04169 protein	1.00E-46	Q5CZ07_CRYPV	Protein with similarity to Gle1l protein, nuclear-export-signal (NES)-containing	0.001	Q5CNE8_CRYHO	Hypothetical protein	0.003			M
CD196142	Q8I5I2_PLAF7	Hypothetical protein	3.4	Q55G69_DICDI	Hypothetical protein	5.8												M
CF496843	Q83CJ5_COXBU	Electron transfer flavoprotein-ubiquinone oxidoreductase (EC 1.5.5.1)	0.68	Q4DY10_TRYCR	Hypothetical protein	2	Q4DJN6_TRYCR	Hypothetical protein	2	Q6I7B5_MOUSE	BCL9-related beta-catenin-binding protein	5.7	Q6GQY0_MOUSE	Bcl9l protein (Fragment)	5.7			M
CD140891																		M
CONTIG2963	Q66I17_BRARE	Zgc:92083	9.00E-53	Q7ZTJ3_XENLA	MGC53832 protein	6.00E-52	Q4RYJ2_TETNG	Chromosome 2 SCAF14976, whole genome shotgun sequence. (Fragment)	1.00E-51	Q7ZTQ2_XENLA	Facl2-prov protein	1.00E-51	Q6DF45_XENTR	Acyl-CoA synthetase long-chain family member 6	3.00E-51			M
BE431262	Q8J1I3_AGABI	Putative hexose transporter (Fragment)	6.3															M
Contig4090		UNKNOWN 2612	OM0023392-AOP															M
CONTIG7924	Q5D917_SCHJA	SJCHGC01315 protein	7.00E-58	RBX1A_DROME	RING-box protein 1A (Regulator of cullins 1a) (dRbx1)	2.00E-51	Q4T150_TETNG	Chromosome undetermined SCAF10716, whole genome shotgun sequence	3.00E-50	Q32Q48_BRARE	Hypothetical protein (Fragment)	3.00E-50	Q642J6_BRARE	Im:7137515 protein (Fragment)	3.00E-50			M
CD085157	Q8UUL3_ORYLA	DAXX protein	0.4	Q7RXD5_NEUCR	Predicted protein	0.53	Q9Y766_ASPPA	Transcription factor AFLR	0.9	PPZ2_YEAST	Serine/threonine protein phosphatase PP-Z2 (EC 3.1.3.16)	0.9	Q3EIE5_ACTSC	Formate dehydrogenase (EC 1.2.1.2)	1.5			M
CONTIG12034	Q9I8H8_XENLA	Ras related small G protein RAL-A (RALA protein)	2.00E-46	RALA_SAGOE	Ras-related protein Ral-A	1.00E-45	RALA_RAT	Ras-related protein Ral-A	1.00E-45	RALA_MOUSE	Ras-related protein Ral-A	1.00E-45	Q3ZCK2_BOVIN	Hypothetical protein MGC126951	2.00E-45			M
CD141012	Q5DI56_SCHJA	SJCHGC09287 protein	2.00E-30	Q6XHA6_DICDI	Hypothetical protein roco10	5.7	Q4IDS4_GIBZE	Hypothetical protein	5.7	Q3K8R8_PSEFL	Leucine-rich repeat	7.5	Q3Q642_9GAMM	Hypothetical protein precursor	7.5			M
Contig4502		UNKNOWN 2494 POSSIBLE ANTISENSE	OM0023365-AOP	UnpES [Homo sapiens]	UnpES [Homo sapiens]													M
CD079845	Q5BVT5_SCHJA	SJCHGC07766 protein (Fragment)	0.94	Q64LI3_9TURB	NADH dehydrogenase subunit 2	4.7												M
Contig1495		UNKNOWN 713	OM0023375-AOP	hypothetical	hypothetical													M
CD157790	Q9VY46_DROME	CG1839-PA (GH11272p)	0.007	Q8BH70_MOUSE	Adult male olfactory brain cDNA, RIKEN full-length enriched library, clone:64305	0.013	Q5BJH0_HUMAN	FBXL4 protein	0.013	FBXL4_HUMAN	F-box/LRR-repeat protein 4 (F-box and leucine-rich repeat protein 4) (F-box prot	0.013	Q5U388_BRARE	F-box and leucine-rich repeat protein 4	0.016			M
CONTIG6142	O43948_PLAFA	PK4 protein kinase	0.24	Q6LEZ2_PLAF7	P. falciparum PK4 protein kinase (EC 2.7.1.-)	0.41	Q8IDR9_PLAF7	40S ribosomal subunit protein S6, putative	0.41	Q5CFF4_CRYHO	DNA repair protein rhp16	0.53	Q8II57_PLAF7	Structural maintenance of chromosome protein, putative	0.7			M
Contig4264		UNKNOWN 2701	OM0023400-AOP	hypothetical	hypothetical													M
CD132898	Q8N9U5_HUMAN	Hypothetical protein FLJ36199	0.75	Q5SVQ8_HUMAN	FRBZ1 protein	0.75	Q7Z4T1_HUMAN	FRBZ1 (Fragment)	0.75	Q628R2_CAEBR	Hypothetical protein CBG00265	0.98	Q6FSP2_CANGA	Similarities with sp|Q08957 Saccharomyces cerevisiae YOL019w TOS7	0.98			M
CD141150																		M
>CL628	Q54B64_DICDI	Hypothetical protein	0.69	Q4Z6X3_PLABE	Hypothetical protein	0.9	Q8I5W3_PLAF7	Hypothetical protein	0.9	Q54X21_DICDI	Hypothetical protein	1.5	Q54KG0_DICDI	Hypothetical protein	1.5			M
Contig1935		SIMILAR TO CDC91 CELL DIVISION CYCLE 91-LIKE 1 (5E-14)	OM0023328-AOP															M
Contig5639		UNKNOWN 3326	OM0023349-AOP															M
CD120805	VHS_EHV1V	Virion host shutoff protein	2.6	VHS_EHV1B	Virion host shutoff protein	2.6	O39261_9ALPH	19	7.5									M
CD134844	Q6PAA2_XENLA	MGC68555 protein	2.00E-20	Q6DIF7_XENTR	MGC89575 protein	3.00E-20	Q6DEK0_BRARE	Zgc:100972	3.00E-20	Q6DCR3_XENLA	Riok3-prov protein	3.00E-20	Q4TI30_TETNG	Chromosome undetermined SCAF2440, whole genome shotgun sequence. (Fragment)	5.00E-20			M
Contig5531		UNKNOWN 3257	OM0023367-AOP	EH-domain containing 3; EH domain containing 3 [Homo sapiens]	EH-domain containing 3; EH domain containing 3 [Homo sapiens]													M
Contig7119		UNKNOWN 4511	OM0023379-AOP	alpha Spectrin CG1977-PA	alpha Spectrin CG1977-PA													M
CD142011	Q86F86_SCHJA	Clone ZZD10 mRNA sequence	3.00E-08	Q5DHX7_SCHJA	SJCHGC01569 protein	4.00E-08	VA52_DOLMA	Venom allergen 5.01 precursor (Antigen 5 form 2) (Ag5-2) (Allergen Dol m 5.01) (	8.00E-08	Q5DEN9_SCHJA	SJCHGC01839 protein	2.00E-07	VA53_DOLMA	Venom allergen 5.02 precursor (Antigen 5 form 3) (Ag5-3) (Allergen Dol m 5.02) (	2.00E-07			M
Contig4655		SIMILAR TO NICE-5 PROTEIN (7E-26)	OM0023331-AOP															M
Contig206		SIMILAR TO SERINE/THREONINE PROTEIN KINASE TAO1 (1E-08)	OM0023330-AOP															M
CD078495	Q5VYK7_HUMAN	Novel protein	1.00E-04	GPTC2_HUMAN	G patch domain containing protein 2	1.00E-04	GPTC2_MOUSE	G patch domain containing protein 2	2.00E-04	Q9VNC5_DROME	CG31550-PA, isoform A (GH04826p)	4.00E-04	Q9VNC4_DROME	CG31550-PB, isoform B	4.00E-04			M
Contig3120		UNKNOWN 1849 POSSIBLE ANTISENSE	OM0023336-AOP	Small membrane protein 1 (sp|SMP1_MOUSE)	Small membrane protein 1 (sp|SMP1_MOUSE)													M
CONTIG11813	Q5C7X4_SCHJA	SJCHGC07929 protein (Fragment)	3.00E-10	Q9V4A0_DROME	CG11155-PA, isoform A	2.00E-04	Q8IM95_DROME	CG11155-PB, isoform B	2.00E-04	Q8IM94_DROME	CG11155-PC, isoform C	2.00E-04	Q9VPV3_DROME	CG4226-PB, isoform B (Cg4226-pa, isoform a)	0.005			M
CD068172	Q54RC2_DICDI	Hypothetical protein	1.5															M
CD129667	OPT2_ARATH	Probable oligopeptide transporter 2 (AtOPT2)	6															M
CONTIG12357	Q5C1B7_SCHJA	SJCHGC09454 protein (Fragment)	2.00E-28	Q8K3A8_MOUSE	Sfrs4 protein	1.00E-17	Q542V3_MOUSE	8 days embryo whole body cDNA, RIKEN full-length enriched library, clone:5730499	1.00E-17	Q5VXP1_HUMAN	Splicing factor, arginine\/serine-rich 4 (Splicing factor, arginine/serine-rich	1.00E-17	Q53F45_HUMAN	Splicing factor, arginine/serine-rich 4 variant (Fragment)	1.00E-17			M
Contig1912		SIMILAR TO PTD015 PROTEIN (5E-05)	OM0023328-AOP															M
CONTIG7722	Q9VRA6_DROME	CG1412-PA	3.00E-05	Q95TR0_DROME	LD29482p	3.00E-05	Q6IDH3_DROME	SD12316p	3.00E-05	GAP_CAEEL	GTPase-activating protein GAP (CeGAP)	0.001	Q80TD7_MOUSE	MKIAA1424 protein (Fragment)	0.002			M
[truncated: 892 more rows]
