# Supplementary material for: Use of Genomic DNA as an Indirect Reference for Identifying Gender-Associated Transcripts in Morphologically Identical, but Chromosomally Distinct, Schistosoma mansoni Cercariae
Source: PLoS Negl Trop Dis. 2008 Oct 22;2(10):e323. doi: 10.1371/journal.pntd.0000323 (PMC2565838; doi:10.1371/journal.pntd.0000323)
Supplement: Dataset S4 — Mobile Genetic Element (MGE) Oligo information. Worksheet provides details of the differentially expressed MGEs identified in this study. Column A indicates unique identifier for each 50-mer sequence on DNA microarray. Column B provides the corresponding 50-mer sequences deposited on the DNA micoarray. Columns C-Q represent best BLASTx matches of parent sequence (including names and E values). (0.08 MB XLS) [file pntd.0000323.s004.xls]

## Sheet: Sheet1
Common	oligo sequence	hit1id_lrge	hit1name_lrge	hit1evalue	hit2id	hit2name	hit2evalue	hit3id	hit3name	hit3evalue	hit4id	hit4name	hit4evalue	hit5id	hit5name	hit5evalue
Female Dual
SMLIBREPF	[AmC6]AGTTCGCATTATCATTTCGAACATTGAGTTGAATGTCGAGTGGTGAATTC		S.MANSONI LIBERIAN STRAIN REPETITIVE DNA	OM0023338-AOP
SMW2REPM	[AmC6]CGAATGCGTCTATTGAGCTATGTTCTGCATATTGGTCTGAACAAGTGATG		S.MANSONI MALE W2 REPETITIVE SEQUENCE, CLONE PUC18-37	OM0023337-AOP
SMLIBREPM	[AmC6]AGTTTGCATTATCATTTCGAACATTGAGTTGAATGTCGAGTGGTGAATTC		S.MANSONI LIBERIAN STRAIN REPETIVE DNA	OM0023338-AOP
CONTIG11025	[AmC6]taagggcctgatagttgtctcatatgtctaagcaactgtgaaggtctttt	Q4QQF9_SCHMA	Gag protein (Fragment)	e-100	Q9BM81_CLOSI	Gag-pol polyprotein	3.00E-32	Q9BM79_CLOSI	Gag-pol polyprotein	5.00E-32	Q9BM80_CLOSI	Gag-pol polyprotein	3.00E-30	Q7PCR6_ANOGA	ENSANGP00000017444 (ENSANGP00000018521) (Fragment)	3.00E-24
CONTIG10772	[AmC6]tattttcgctacaaacaatcagtagacacttcgttcaaacgtcaaaggag	Q6IFU2_SCHMA	Pol polyprotein	1.00E-32	Q5BTC6_SCHJA	SJCHGC02003 protein (Fragment)	4.00E-10	Q5BTC0_SCHJA	SJCHGC02046 protein (Fragment)	1.00E-08	Q5BTC7_SCHJA	SJCHGC02001 protein	7.00E-07	Q4QQE0_SCHMA	Endonuclease-reverse transcriptase	0.014
CONTIG5844	[AmC6]tggttgtttagttataactgataattctaagcaactgtttacctttgctt	Q4QQD9_SCHMA	Reverse transcriptase (Fragment)	2.00E-09	Q53GZ4_HUMAN	Leucine rich repeat containing 5 variant (Fragment)	2	Q659A9_HUMAN	Hypothetical protein DKFZp547I0910 (Fragment)	2	Q658W7_HUMAN	Hypothetical protein DKFZp666L2010 (Fragment)	2	LRRC5_HUMAN	Leucine-rich repeat-containing protein 5 precursor	2
SMLA27E06	[AmC6]aactaacaaccaattgtggatgaaatcaagtaaaagtgatggatgtagat	Q4QQE8_SCHMA	Endonuclease-reverse transcriptase	8.00E-07	Q5C0M3_SCHJA	SJCHGC02939 protein (Fragment)	0.015	Q5DEY9_SCHJA	SJCHGC02887 protein	0.13	Q30KX0_SCHMA	Reverse transcriptase SR3-left (Fragment)	0.37	Q30KW9_SCHMA	Reverse transcriptase SR3-right (Fragment)	0.37
CD060968	[AmC6]cgatgaatgatcgtacagtcgatgaaaatgagtttcagcagtatcaattt	Q4QQE8_SCHMA	Endonuclease-reverse transcriptase	8.00E-06	Q5D9Z7_SCHJA	SJCHGC03074 protein	0.13	Q5BSV8_SCHJA	SJCHGC03153 protein	0.63
CD114188	[AmC6]atacacagcaaatgggtaaggaggagcattggaatctaaaggcggaaaaa	Q4QQE8_SCHMA	Endonuclease-reverse transcriptase	3.00E-22	Q5C0M3_SCHJA	SJCHGC02939 protein (Fragment)	2.00E-05	Q5BST9_SCHJA	SJCHGC03271 protein (Fragment)	1.00E-04	Q5BSZ5_SCHJA	SJCHGC03034 protein	2.00E-04	Q5BRY6_SCHJA	SJCHGC07009 protein (Fragment)	0.006
CD192752	[AmC6]catgactacagtccagtaatgtggatttaaaatgctgaagattttgtggg	Q4QQD7_SCHMA	Reverse transcriptase	6.00E-10	Q7RTK8_SCHMA	Reverse transcriptase	0.037	Q72XZ6_BACC1	DNA-binding response regulator	0.91	Q815N4_BACCR	Two-component response regulator	2.6	Q4XSJ6_PLACH	Hypothetical protein (Fragment)	3.4
CF500709	[AmC6]catatgattgcccaaaaatagaggtcatacgtgttacatttctctctgac	Q9BM81_CLOSI	Gag-pol polyprotein	3.00E-10	Q9BM80_CLOSI	Gag-pol polyprotein	3.00E-10	Q9BM79_CLOSI	Gag-pol polyprotein	3.00E-10	Q4QQD5_SCHMA	Gag protein	2.00E-06	Q6IFT9_SCHMA	Gag protein	7.00E-06
CONTIG12200	[AmC6]attaaccactgagtaagtggccaagtccacgtttatttattcctttagtg	Q4QQE8_SCHMA	Endonuclease-reverse transcriptase	3.00E-19	Q5BSV8_SCHJA	SJCHGC03153 protein	3.00E-11	Q5M1J1_STRT1	Hypothetical protein	0.021	Q5M633_STRT2	Conserved hypothetical, predicted membrane protein (TMS7)	0.036	Q5BT30_SCHJA	SJCHGC02932 protein (Fragment)	0.081
CONTIG3811	[AmC6]gtgataattcttcttgcggttgattatctccttgtacgacaaaggtagtg	Q4QQE8_SCHMA	Endonuclease-reverse transcriptase	8.00E-32	Q5C0M3_SCHJA	SJCHGC02939 protein (Fragment)	3.00E-18	Q5BST9_SCHJA	SJCHGC03271 protein (Fragment)	7.00E-06	Q8REH4_FUSNN	Chromosome partition protein smc	0.062	Q7P523_FUSNV	Chromosome partition protein smc	0.062
CONTIG7540	[AmC6]tccatttcatatctgcttccataacatggcataatttgttctttggcttt	Q4QQE8_SCHMA	Endonuclease-reverse transcriptase	2.00E-10	Q5C0M3_SCHJA	SJCHGC02939 protein (Fragment)	0.001	Q5BSV8_SCHJA	SJCHGC03153 protein	2.2	Q332K3_9CAUD	Hypothetical protein	3.7	Q5ISA3_9PRIM	5-alpha-hydroxytryptamine receptor 6 (Fragment)	8.2
>CL1422	[AmC6]ttgagtaagagtaacagacgttcggtgatggatataattgaaaatcaacc	Q4QQE8_SCHMA	Endonuclease-reverse transcriptase	1.00E-10	Q5DCR7_SCHJA	SJCHGC03163 protein	2.00E-09	Q5BS58_SCHJA	SJCHGC06058 protein	7.00E-04	Q5BQS2_SCHJA	SJCHGC09829 protein	7.00E-04	Q5BSN8_SCHJA	SJCHGC03699 protein	0.91
Female Direct
SMU10109	[AmC6]AGATAGCAAATCAGTTGTTCATCGTAGTAGAGGAGTACACACGTTGGACG		SCHISTOSOMA MANSONI FEMALE-SPECIFIC REPETITIVE DNA, REPEAT W2	OM0023338-AOP
SMW2REPF	[AmC6]CGAATGCGTCTATTGAGCTATGTTCTGCATATTGGTCTGAACAAGTGATG		S.MANSONI FEMALE W2 REPETITIVE SEQUENCE, CLONE PUC18-116B	OM0023337-AOP
SCMDNAP	[AmC6]AGTTTGCATTATCATTTCGAACATTGAGTTGAATGTCGAGTGGTGAATTC		S.MANSONI FEMALE-SPECIFIC DNA REPEAT W1	OM0023376-AOP
SMU12442	[AmC6]ACTGAAAACCACTATCCATCTCCCCATTAAATGCTTGTCAATTGAAGCTT		SCHISTOSOMA MANSONI OZ.A FEMALE-SPECIFIC RETROPOSON SMALPHAFEM-1 REPEAT REGION	OM0023338-AOP
CF493654	[AmC6]aaggtcaaaatttcatcctttttcaatggcaataaacctttgacgtgtgc	Q6IFT8_SCHMA	Pol polyprotein	2.00E-10	Q6IFU3_SCHMA	Pol polyprotein (Fragment)	6.00E-07	Q68NI0_SCHMA	Polyprotein (Fragment)	6.00E-07	Q9TX34_PISOC	POL protein	2.00E-05	Q4QQD4_SCHMA	Pol polyprotein	6.00E-05
Contig5532	[AmC6]GACAACTTAAAAGCTCATTGATGGTACAGCCTGATGTAACTAGATGGAGT		SIMILAR TO GAG-POL POLYPROTEIN (7E-10)	OM0023367-AOP
SMU66334	[AmC6]TAGGGTCAACCATATGTCTTATCAAGAAGCCTAGACGATTGGGTATAAAA		SCHISTOSOMA MANSONI SR1 NON-LTR RETROTRANSPOSON, INTERNAL FRAGMENT E3, POL PSEUD	OM0023337-AOP
CD066571	[AmC6]gcacagtagaatgttgctgatagtatctgaccaacaaatccgaagtatct	Q4QQE8_SCHMA	Endonuclease-reverse transcriptase	3.00E-12	Q5BT30_SCHJA	SJCHGC02932 protein (Fragment)	0.004	Q9AW75_GUITH	Hypothetical protein	2.3	Q8IL76_PLAF7	Hypothetical protein	4	Q5R8Y9_PONPY	Hypothetical protein DKFZp468J085 (Fragment)	6.7
CD089057	[AmC6]gcaatagcagtgattattgtggaattgatcttcctggttattattgtcac	Q4QQE8_SCHMA	Endonuclease-reverse transcriptase	1.00E-09	Q5BST9_SCHJA	SJCHGC03271 protein (Fragment)	3.00E-09	Q5DHV0_SCHJA	SJCHGC03719 protein	0.016	Q4C2A0_CROWT	Hypothetical protein	1.5	Q4DCR4_TRYCR	Hypothetical protein	3.4
CD167034	[AmC6]tgccttgaaattcgtattgaagattgtaactttgttgttgtctgacagac	Q4QQE8_SCHMA	Endonuclease-reverse transcriptase	6.00E-19	Q5BSV8_SCHJA	SJCHGC03153 protein	0.001	Q5BSE4_SCHJA	SJCHGC04778 protein (Fragment)	0.001	Q5BT64_SCHJA	SJCHGC02633 protein (Fragment)	0.017	Q5DGI4_SCHJA	SJCHGC03084 protein	0.11
CD167979	[AmC6]ggtagcattgactaagcgctatttatagaggtaaaatccatgacagttac	Q4QQE8_SCHMA	Endonuclease-reverse transcriptase	3.00E-09	Q5BSV8_SCHJA	SJCHGC03153 protein	4.00E-07	Q8I5Z0_PLAF7	Hypothetical protein	7.6
CF498163	[AmC6]tcaataaatcccttaaaggtttgagctgcattagttagaccaaatggcat	Q6IFU3_SCHMA	Pol polyprotein (Fragment)	1.00E-30	Q9BM81_CLOSI	Gag-pol polyprotein	2.00E-30	Q4QQF8_SCHMA	Pol polyprotein	2.00E-30	Q9BM79_CLOSI	Gag-pol polyprotein	9.00E-30	Q9BM80_CLOSI	Gag-pol polyprotein	1.00E-29
CF499068	[AmC6]actaaggtacgagagtcttgtgtcatctttgtatagtgtttcttcgaaac	Q5C387_SCHJA	SJCHGC03776 protein (Fragment)	3.00E-06	Q5C3C1_SCHJA	SJCHGC04023 protein (Fragment)	3.00E-05	Q8T5G5_SCHJA	Polyprotein	2.00E-04	Q5DER0_SCHJA	SJCHGC03006 protein	0.021	Q8MWP9_SCHJA	Polyprotein (Fragment)	0.047
CF501265	[AmC6]agacgattgatttattcatcaacttttgataatgtcacaatatggcactg	Q4QQF6_SCHMA	Gag-pol polyprotein (Fragment)	2.00E-36	Q4QQF7_SCHMA	Gag-pol polyprotein	5.00E-10	Q4QQF4_SCHMA	Gag-pol polyprotein	1.00E-08	Q5XUN2_SCHMA	Reverse transcriptase (Fragment)	2.00E-05	Q5XUN3_SCHMA	Reverse transcriptase (Fragment)	5.00E-04
CF503259	[AmC6]ttttagcttgtttatcgaacgttttatggtaccagcaaatgttatgtcgg	Q9BM79_CLOSI	Gag-pol polyprotein	8.00E-13	Q9BM81_CLOSI	Gag-pol polyprotein	7.00E-12	Q9BM80_CLOSI	Gag-pol polyprotein	8.00E-10	Q7PCR6_ANOGA	ENSANGP00000017444 (ENSANGP00000018521) (Fragment)	1.00E-07	Q5TNP3_ANOGA	ENSANGP00000028338 (Fragment)	2.00E-05
CF502958	[AmC6]cgtgccaagcctgaagaaacacatgaaagatctaaaaatagactacagca	Q4QQD4_SCHMA	Pol polyprotein	9.00E-12	Q6IFT8_SCHMA	Pol polyprotein	4.00E-10	Q5C300_SCHJA	SJCHGC06882 protein (Fragment)	7.00E-09	Q5C2Z3_SCHJA	Hypothetical protein	7.00E-09	Q9BM79_CLOSI	Gag-pol polyprotein	2.00E-08
CONTIG10455	[AmC6]tcgtattgaagattctcacttcgaagttagttgacagttgttctgagttc	Q4QQE8_SCHMA	Endonuclease-reverse transcriptase	1.00E-42	Q5BSE4_SCHJA	SJCHGC04778 protein (Fragment)	3.00E-26	Q5BT64_SCHJA	SJCHGC02633 protein (Fragment)	6.00E-18	Q5DGI4_SCHJA	SJCHGC03084 protein	1.00E-12	Q5BQS2_SCHJA	SJCHGC09829 protein	3.00E-11
CONTIG10955	[AmC6]cacacattttcgaagggtctgattacccatcttatttgtaatctcgactt	Q4QQF5_SCHMA	Gag-pol polyprotein	2.00E-12	Q5C201_SCHJA	SJCHGC05312 protein (Fragment)	3.00E-11	Q4QQF3_SCHMA	Gag-pol polyprotein	9.00E-11	Q4QQF7_SCHMA	Gag-pol polyprotein	1.00E-10	Q4QQF2_SCHMA	Gag-pol polyprotein	6.00E-10
CONTIG11158	[AmC6]gaaaaactaatgaaacttggtatcataaggccatctaatagtccctgggc	Q9BM81_CLOSI	Gag-pol polyprotein	7.00E-67	Q9BM79_CLOSI	Gag-pol polyprotein	2.00E-66	Q9BM80_CLOSI	Gag-pol polyprotein	2.00E-65	Q7PCR6_ANOGA	ENSANGP00000017444 (ENSANGP00000018521) (Fragment)	2.00E-57	Q5TNP3_ANOGA	ENSANGP00000028338 (Fragment)	5.00E-56
CONTIG8539	[AmC6]tactctttagatgaatccgagcatgttaacattgaaggagctctgatagt	Q6IFU1_SCHMA	Pol polyprotein	e-101	Q5C1P5_SCHJA	SJCHGC06497 protein (Fragment)	6.00E-53	Q4QQD2_SCHMA	Gag-pol polyprotein	5.00E-37	Q76C95_DROSI	Hypothetical protein	6.00E-16	Q76C94_DROSI	Hypothetical protein	6.00E-16
SMLA37C12	[AmC6]tccctccaaagcctttttattaacgaaatcttctcaacttttccaaaggt	Q6IFT8_SCHMA	Pol polyprotein	e-150	Q6IFU3_SCHMA	Pol polyprotein (Fragment)	5.00E-58	Q9BM80_CLOSI	Gag-pol polyprotein	1.00E-57	Q9BM81_CLOSI	Gag-pol polyprotein	2.00E-57	Q9BM79_CLOSI	Gag-pol polyprotein	5.00E-57
Female Indirect
CD095971	[AmC6]actctcaaccaatttcaaggtcagaatctttaatacgaacgtcaagacag	Q4QQE8_SCHMA	Endonuclease-reverse transcriptase	2.00E-04	Q5BQT0_SCHJA	SJCHGC09821 protein	0.009	Q5BT64_SCHJA	SJCHGC02633 protein (Fragment)	0.009	Q5DGI4_SCHJA	SJCHGC03084 protein	0.027	Q5BSE4_SCHJA	SJCHGC04778 protein (Fragment)	0.035
CF499598	[AmC6]tttggcgtttagatcgttcatcagaagtgttaggtcgtttattgggtact	Q4QQE8_SCHMA	Endonuclease-reverse transcriptase	8.00E-47	Q5C264_SCHJA	SJCHGC06886 protein (Fragment)	2.00E-44	Q5BSY2_SCHJA	SJCHGC03063 protein	2.00E-16	Q5TRM3_ANOGA	ENSANGP00000027774 (Fragment)	1.00E-13	Q5TRD1_ANOGA	ENSANGP00000028171 (Fragment)	2.00E-13
SMU66336	[AmC6]AAAAGATTTAGGGAGTGTTGGTACCCTATGACCTGAAATCGTATGCGAAC		SCHISTOSOMA MANSONI SR1 NON-LTR RETROTRANSPOSON, INTERNAL FRAGMENT BS6, POL PSEU	OM0023337-AOP
CD065344	[AmC6]acggtcgttacgatttaccatatttgcctgtctgattattcgttgttcta	Q30KX0_SCHMA	Reverse transcriptase SR3-left (Fragment)	5.00E-06	Q30KW9_SCHMA	Reverse transcriptase SR3-right (Fragment)	7.00E-06	Q4QQE8_SCHMA	Endonuclease-reverse transcriptase	2.00E-05	Q5BT18_SCHJA	SJCHGC02983 protein	0.68	Q4F8Q3_AEDAE	Reverse transcriptase (Fragment)	2.6
CONTIG10814	[AmC6]aagacaatatcaccctcatattccaggtcgagaagtctttctctagacaa	Q8T5G5_SCHJA	Polyprotein	4.00E-14	Q8MWP9_SCHJA	Polyprotein (Fragment)	4.00E-14	Q5DBA5_SCHJA	SJCHGC09144 protein	2.00E-13	Q5C3A3_SCHJA	SJCHGC09318 protein (Fragment)	3.00E-09	Q4QQE8_SCHMA	Endonuclease-reverse transcriptase	9.00E-07
CD078705	[AmC6]gaagaacacattactccgagaaatgaagacagacatgagaagaatgagta	Q4QQE8_SCHMA	Endonuclease-reverse transcriptase	2.00E-24	Q5BSV8_SCHJA	SJCHGC03153 protein	2.00E-07	Q5D9Z7_SCHJA	SJCHGC03074 protein	0.001	Q7VRW7_BLOFL	Ribonucleoside-diphosphate reductase 1 alpha chain (EC 1.17.4.1)	9.5	Q8N955_HUMAN	Hypothetical protein FLJ38343	9.5
CF499794	[AmC6]aatcttcttctgcattttttgttccatgtgtgaagtttaaatcatacagc	Q4QQE8_SCHMA	Endonuclease-reverse transcriptase	1.00E-52	Q30KX0_SCHMA	Reverse transcriptase SR3-left (Fragment)	7.00E-48	Q30KW9_SCHMA	Reverse transcriptase SR3-right (Fragment)	3.00E-47	Q5DEY9_SCHJA	SJCHGC02887 protein	4.00E-26	Q5BT18_SCHJA	SJCHGC02983 protein	4.00E-14
CD161137	[AmC6]tatccaacttttgttcattcttctcatgtctgtctccatttctcggagta	Q4QQE8_SCHMA	Endonuclease-reverse transcriptase	2.00E-16	Q5BSV8_SCHJA	SJCHGC03153 protein	6.00E-05	Q5BT30_SCHJA	SJCHGC02932 protein (Fragment)	0.05	Q350E9_9GAMM	Hypothetical protein	0.33	Q34X86_9GAMM	Hypothetical protein	0.33
CONTIG10829	[AmC6]atgaatttgttggccactaaaacgtaagataagattaacgtaaactaggg	Q8T5G5_SCHJA	Polyprotein	1.00E-63	Q8MWP9_SCHJA	Polyprotein (Fragment)	1.00E-63	Q5C394_SCHJA	SJCHGC09145 protein (Fragment)	2.00E-62	Q5C3A3_SCHJA	SJCHGC09318 protein (Fragment)	2.00E-62	Q5C3A7_SCHJA	SJCHGC06937 protein (Fragment)	4.00E-49
CONTIG9989	[AmC6]gtatgggatagatctgtgaaatccaaatcatctagttgcatgcattctat	Q30KW9_SCHMA	Reverse transcriptase SR3-right (Fragment)	5.00E-18	Q30KX0_SCHMA	Reverse transcriptase SR3-left (Fragment)	1.00E-17	Q4QQE8_SCHMA	Endonuclease-reverse transcriptase	8.00E-15	Q5BSE4_SCHJA	SJCHGC04778 protein (Fragment)	2.00E-06	Q5D952_SCHJA	SJCHGC04954 protein	0.007
Contig3227	[AmC6]AGTAGTTGAGAAGTTCGTGTATCTAGGTAGCTACATAAGTGGTGGTGGTG		SIMILAR TO POLYPROTEIN (8E-13)	OM0023334-AOP
CF498042	[AmC6]caccaacaaagagcagatataacagatattccttcaatgtagcatctagg	Q81X46_BACAN	Transposase, IS605 family	2.00E-13	Q732J6_BACC1	Transposase, IS605 OrfB family	1.00E-12	Q46219_CLOPE	IS1136 DNA (Fragment)	1.00E-12	Q331V1_9CAUD	Putative IS transposase (OrfB)	1.00E-12	Q4Z968_9CAUD	ORF021	2.00E-12
SMLA29B10	[AmC6]gatcctatgatagggtggattaaattaaaatccggaaaccgatttagaac	Q6IFU1_SCHMA	Pol polyprotein	2.00E-85	Q5C1Q8_SCHJA	SJCHGC09633 protein (Fragment)	1.00E-40	Q6DU52_SCHMA	Polyprotein (Fragment)	2.00E-26	Q5TRC9_ANOGA	ENSANGP00000002241 (Fragment)	2.00E-12	Q76C95_DROSI	Hypothetical protein	1.00E-11
CF497731	[AmC6]gccaattactgaaactatttgaaaaagatggaacaataaccccactctga	Q5C394_SCHJA	SJCHGC09145 protein (Fragment)	4.00E-06	Q8T5G5_SCHJA	Polyprotein	5.00E-06	Q8MWP9_SCHJA	Polyprotein (Fragment)	5.00E-06	Q5C3A3_SCHJA	SJCHGC09318 protein (Fragment)	7.00E-06	Q6BVW3_DEBHA	Similar to sp|P06115 Saccharomyces cerevisiae YGR088w CTT1 catalase T	0.9
CD061177	[AmC6]gatcttctcttctttcttcgtcgtgtcatacagttgtttcatatttcctt	Q30KX0_SCHMA	Reverse transcriptase SR3-left (Fragment)	1.00E-09	Q30KW9_SCHMA	Reverse transcriptase SR3-right (Fragment)	2.00E-09	Q4QQE8_SCHMA	Endonuclease-reverse transcriptase	9.00E-09	Q5BT18_SCHJA	SJCHGC02983 protein	0.002	Q5DEY9_SCHJA	SJCHGC02887 protein	0.24
CD147614	[AmC6]ggatgtggtgtattttgtgtagaaagctgttaaaaaatgaatgtattgtt	Q4QQE8_SCHMA	Endonuclease-reverse transcriptase	3.00E-09	Q30KW9_SCHMA	Reverse transcriptase SR3-right (Fragment)	9.00E-09	Q30KX0_SCHMA	Reverse transcriptase SR3-left (Fragment)	3.00E-08	Q5BT18_SCHJA	SJCHGC02983 protein	0.028	Q7XVC3_ORYSA	OSJNBa0072D21.13 protein	2
CF501417	[AmC6]taaacttgtttggttcgttcttcttgtattatgctctccacatttgattt	Q8MWP8_SCHJA	Polyprotein (Fragment)	5.00E-05	Q8T5G5_SCHJA	Polyprotein	8.00E-05	Q8MWP9_SCHJA	Polyprotein (Fragment)	8.00E-05	Q3MJT3_SCHJA	SJCHGC05140 protein	0.001	Q5BT13_SCHJA	SJCHGC03000 protein (Fragment)	0.001
SMLC35C09	[AmC6]gtgttctttctcggataaactatgtcatttcccatgtagttaattttccc	Q4QQD3_SCHMA	Gag-pol polyprotein	8.00E-12	Q61LJ6_CAEBR	Hypothetical protein CBG08875	0.1	Q3R3G7_XYLFA	CagE, TrbE, VirB component of type IV transporter system	0.3	Q5LWL4_SILPO	Translation initiation factor IF-2	0.39	Q3F7Q7_9BURK	Hypothetical protein	0.51
CONTIG1505	[AmC6]tcttttcaagatgctagaactgcatgtattaactacgaagcagtgaatga	Q4QQF4_SCHMA	Gag-pol polyprotein	1.00E-39	Q5D8K5_SCHJA	SJCHGC02198 protein	5.00E-39	Q4QQF1_SCHMA	Gag-pol polyprotein	3.00E-35	O17342_CAEEL	Hypothetical protein	2.00E-32	P91422_CAEEL	Hypothetical protein	2.00E-31
CD178149	[AmC6]aatgtttgtcctttccacctacagtaacttttccaaatttcctcttcaac	Q4QQE8_SCHMA	Endonuclease-reverse transcriptase	3.00E-08	Q4HX29_GIBZE	Hypothetical protein	5.8	Q8YR34_ANASP	Type I restriction-modification enzyme R subunit	10
CD085463	[AmC6]acaactctctcctgaactctcctctccagctatttacacatactattcat	Q4QQE8_SCHMA	Endonuclease-reverse transcriptase	9.00E-06	Q5D9Z7_SCHJA	SJCHGC03074 protein	0.016	Q5BSV8_SCHJA	SJCHGC03153 protein	0.016
>CL1156	[AmC6]aacaccagacaactcttcagactaataaaagaaaccggaatcaagaagtc	Q5C3A3_SCHJA	SJCHGC09318 protein (Fragment)	6.00E-81	Q8T5G5_SCHJA	Polyprotein	3.00E-66	Q8MWP9_SCHJA	Polyprotein (Fragment)	3.00E-66	Q5C394_SCHJA	SJCHGC09145 protein (Fragment)	1.00E-59	Q5C3A7_SCHJA	SJCHGC06937 protein (Fragment)	3.00E-40
CONTIG10886	[AmC6]tttactagatgacttgaaccccttttaaagatggggatgactatcgattc	Q8T5G5_SCHJA	Polyprotein	2.00E-36	Q8MWP9_SCHJA	Polyprotein (Fragment)	2.00E-36	Q5C3A3_SCHJA	SJCHGC09318 protein (Fragment)	3.00E-34	Q5C394_SCHJA	SJCHGC09145 protein (Fragment)	7.00E-33	Q5C3A7_SCHJA	SJCHGC06937 protein (Fragment)	7.00E-25
SMLA45H10	[AmC6]ccgaaaccctattacactttttgtcgagattggatctggtatgtaacgtg	Q8T5G5_SCHJA	Polyprotein	4.00E-37	Q8MWP9_SCHJA	Polyprotein (Fragment)	4.00E-37	Q5DBA5_SCHJA	SJCHGC09144 protein	8.00E-36	Q5BSC9_SCHJA	SJCHGC05010 protein (Fragment)	3.00E-26	Q5BSF5_SCHJA	SJCHGC04561 protein (Fragment)	4.00E-13
CD068213	[AmC6]ctgcttctaattatcgactcagtgtgttctttaaccttactctttccgtt	Q5BSV8_SCHJA	SJCHGC03153 protein	8.00E-06	Q4QQE8_SCHMA	Endonuclease-reverse transcriptase	0.002	Q512U7_ENTHI	Hypothetical protein	5	Q6BJ94_DEBHA	Similar to tr|Q9P865 Candida albicans She9 protein	5	Q9U8B4_PLAFA	Merozoite surface protein 5	6.5
CONTIG1185	[AmC6]tttttgggtagatcttttacgacttggaaccagttgttcagttatcttga	Q4QQE8_SCHMA	Endonuclease-reverse transcriptase	2.00E-64	Q5C264_SCHJA	SJCHGC06886 protein (Fragment)	6.00E-31	Q5C0M3_SCHJA	SJCHGC02939 protein (Fragment)	4.00E-28	Q5BST9_SCHJA	SJCHGC03271 protein (Fragment)	6.00E-11	Q5TRM3_ANOGA	ENSANGP00000027774 (Fragment)	1.00E-07
CONTIG4517	[AmC6]tcggcacatgtctctattgtgacaatataaaaagtacctgtttgtgtgta	Q4QQE8_SCHMA	Endonuclease-reverse transcriptase	5.00E-18	Q5BQT0_SCHJA	SJCHGC09821 protein	2.00E-05	Q5BQS2_SCHJA	SJCHGC09829 protein	8.00E-05	Q5BSV8_SCHJA	SJCHGC03153 protein	8.00E-04	Q5DGI4_SCHJA	SJCHGC03084 protein	0.007
>CL1177	[AmC6]cgagaaatggagacagacatgagaagaatgaacaaaaaactggataaaac	Q4QQE8_SCHMA	Endonuclease-reverse transcriptase	4.00E-22	Q5BSV8_SCHJA	SJCHGC03153 protein	5.00E-05	Q4WXB3_ASPFU	Hypothetical protein	2.3	Q6BYE9_DEBHA	Debaryomyces hansenii chromosome A of strain CBS767 of Debaryomyces hansenii	6.7	AANT_HDVD3	Large delta antigen (p27) (HDAg-L) [Contains: Small delta antigen (p24) (HDAg-S)	8.8
CONTIG7383	[AmC6]ttctcagcaatatcatctaactcatggaaatcggatgttcttggtgtttt	Q4QQE8_SCHMA	Endonuclease-reverse transcriptase	4.00E-13	Q5DEY9_SCHJA	SJCHGC02887 protein	1.00E-09	Q5BRY6_SCHJA	SJCHGC07009 protein (Fragment)	3.00E-08	Q30KW9_SCHMA	Reverse transcriptase SR3-right (Fragment)	0.014	Q30KX0_SCHMA	Reverse transcriptase SR3-left (Fragment)	0.032
>CL123	[AmC6]attggcagcaaggtccaccttcaattaactcatcatttcaactatataac	Q8T5G5_SCHJA	Polyprotein	7.00E-42	Q8MWP9_SCHJA	Polyprotein (Fragment)	7.00E-42	Q5C3A3_SCHJA	SJCHGC09318 protein (Fragment)	3.00E-40	Q5C394_SCHJA	SJCHGC09145 protein (Fragment)	5.00E-34	Q5C3A7_SCHJA	SJCHGC06937 protein (Fragment)	4.00E-23
CD201986	[AmC6]gatgtttctccaatgatgtccaaagaggcacgaaacttacttgttggatg	Q4QQE8_SCHMA	Endonuclease-reverse transcriptase	1.00E-11	Q5BSB5_SCHJA	SJCHGC05180 protein	7.00E-04	Q5BT15_SCHJA	SJCHGC02990 protein	0.002	Q5DFU9_SCHJA	SJCHGC02281 protein	0.01	Q5C5W5_SCHJA	SJCHGC02282 protein (Fragment)	0.01
CONTIG12858	[AmC6]tctataatcacttccagaacgtattcttctttcaccaatctcagcttgag	O76213_SCHMA	Reverse transcriptase (Fragment)	3.00E-08
CONTIG10810	[AmC6]aaattgtttgcaattgtgtaggtttattcattctttgttttgtccccaaa	Q5BSA3_SCHJA	SJCHGC05284 protein	1.00E-15	Q8T5G5_SCHJA	Polyprotein	4.00E-15	Q8MWP9_SCHJA	Polyprotein (Fragment)	4.00E-15	Q3MJT3_SCHJA	SJCHGC05140 protein	1.00E-14	Q5BT13_SCHJA	SJCHGC03000 protein (Fragment)	1.00E-14
CONTIG9225	[AmC6]ttgtcttgacttctttgtttgtccttgactgacctctggtttactatatt	Q4QQE8_SCHMA	Endonuclease-reverse transcriptase	2.00E-34	Q5C0M3_SCHJA	SJCHGC02939 protein (Fragment)	4.00E-11	Q5BRY6_SCHJA	SJCHGC07009 protein (Fragment)	2.00E-07	Q5DEY9_SCHJA	SJCHGC02887 protein	2.00E-06	Q9ZK29_HELPJ	Putative	0.009
CD064574	[AmC6]ttgcattgaaaattctgatcttgatgttggttgacaattggtttgagttc	Q4QQE8_SCHMA	Endonuclease-reverse transcriptase	1.00E-26	Q5BT30_SCHJA	SJCHGC02932 protein (Fragment)	2.00E-09	Q5BQT0_SCHJA	SJCHGC09821 protein	2.00E-07	Q5BSE4_SCHJA	SJCHGC04778 protein (Fragment)	2.00E-06	Q5BT64_SCHJA	SJCHGC02633 protein (Fragment)	5.00E-04
CD094930	[AmC6]cgtctatgtttgtcagaatgaaaataatctaaaggcattttagtttaacg	Q30KX0_SCHMA	Reverse transcriptase SR3-left (Fragment)	2.00E-10	Q30KW9_SCHMA	Reverse transcriptase SR3-right (Fragment)	2.00E-10	Q4QQE8_SCHMA	Endonuclease-reverse transcriptase	4.00E-08	O16589_CAEEL	Hypothetical protein F21E9.5	0.89
CONTIG2057	[AmC6]cgtctatgtttgtcagaatgaaaataatctaaaggcattttagtttaacg	Q4QQE9_SCHMA	Endonuclease-reverse transcriptase	3.00E-59	Q4QQE2_SCHMA	Endonuclease-reverse transcriptase	5.00E-31	Q4QQE4_SCHMA	Endonuclease-reverse transcriptase	2.00E-29	O18520_SCHMA	Pol (Fragment)	7.00E-14	Q6S5B0_CHICK	DNA-dependent protein kinase catalytic subunit (Fragment)	4.00E-11
CONTIG11098	[AmC6]cgtctatgtttgtcagaatgaaaataatctaaaggcattttagtttaacg	Q8T5G5_SCHJA	Polyprotein	2.00E-38	Q8MWP9_SCHJA	Polyprotein (Fragment)	2.00E-38	Q5C3A3_SCHJA	SJCHGC09318 protein (Fragment)	5.00E-36	Q5C3A7_SCHJA	SJCHGC06937 protein (Fragment)	4.00E-24	Q5C394_SCHJA	SJCHGC09145 protein (Fragment)	7.00E-24
CD097038	[AmC6]taagcagcataacatattatttcgaatgagtactgttcccttggcatcaa	Q4QQE8_SCHMA	Endonuclease-reverse transcriptase	2.00E-16	Q5BT15_SCHJA	SJCHGC02990 protein	0.001	Q5DFU9_SCHJA	SJCHGC02281 protein	0.004	Q5BT19_SCHJA	SJCHGC02981 protein (Fragment)	0.016	Q5BSB5_SCHJA	SJCHGC05180 protein	0.5
SMLA22B05	[AmC6]atccattgtttctccctgaccttatggtttaccttaactacaaaagcctt	Q8T5G5_SCHJA	Polyprotein	2.00E-37	Q8MWP9_SCHJA	Polyprotein (Fragment)	2.00E-37	Q5C394_SCHJA	SJCHGC09145 protein (Fragment)	6.00E-37	Q5C3A3_SCHJA	SJCHGC09318 protein (Fragment)	4.00E-29	Q5C3A7_SCHJA	SJCHGC06937 protein (Fragment)	1.00E-14
CONTIG3564	[AmC6]aacatcctgactatggtcttctgttacagttattttgagttccggatatt	Q4QQE8_SCHMA	Endonuclease-reverse transcriptase	6.00E-12	Q5BSE4_SCHJA	SJCHGC04778 protein (Fragment)	5.00E-08	Q5BT64_SCHJA	SJCHGC02633 protein (Fragment)	6.00E-04	Q5D952_SCHJA	SJCHGC04954 protein	0.35	Q4QB87_LEIMA	Mitochondrial RNA binding protein, putative	2.9
CONTIG11000	[AmC6]aaacgagtaggatctcctggagttgtagatttatgattaactagttggcc	Q4QQF8_SCHMA	Pol polyprotein	e-121	Q9BM80_CLOSI	Gag-pol polyprotein	2.00E-77	Q9BM79_CLOSI	Gag-pol polyprotein	2.00E-77	Q9BM81_CLOSI	Gag-pol polyprotein	1.00E-75	Q6IFT8_SCHMA	Pol polyprotein	5.00E-73
CONTIG11078	[AmC6]ttgttagcaaactgataaggatcactggctaatttatgaaggttgaaagg	Q4QQD9_SCHMA	Reverse transcriptase (Fragment)	3.00E-55	Q86EK6_SCHJA	Clone ZZD253 mRNA sequence	1.00E-15	Q8UUM3_ORYLA	ReO_6 protein	3.00E-14	Q5BYT4_SCHJA	SJCHGC08991 protein (Fragment)	6.00E-12	Q5TRD8_ANOGA	ENSANGP00000005847 (Fragment)	4.00E-11
CONTIG11047	[AmC6]acccgtgagattcccaatcgtataagtgtaatacgtgcttcctttgacat	Q4QQE8_SCHMA	Endonuclease-reverse transcriptase	4.00E-48	Q5C264_SCHJA	SJCHGC06886 protein (Fragment)	4.00E-32	Q5BSY2_SCHJA	SJCHGC03063 protein	2.00E-11	Q5TRM3_ANOGA	ENSANGP00000027774 (Fragment)	6.00E-11	Q5BT19_SCHJA	SJCHGC02981 protein (Fragment)	1.00E-10
CF500464	[AmC6]gtatttttcatagtagaaagcatgagtcaattgaagctagaccaccatgg	Q4QQD7_SCHMA	Reverse transcriptase	1.00E-14	Q4F8Q4_AEDAE	Reverse transcriptase (Fragment)	3.00E-10	Q90Z50_FUGRU	Putative reverse transcriptase	3.00E-09	Q7RTK8_SCHMA	Reverse transcriptase	5.00E-09	Q9GSW3_DROVI	Hypothetical protein	1.00E-08
CD091392	[AmC6]tcaatgtacatcctatccacttttagtgtgctttgctgaattcctctaca	Q4QQE8_SCHMA	Endonuclease-reverse transcriptase	8.00E-12	Q5BT30_SCHJA	SJCHGC02932 protein (Fragment)	0.38	Q6TU47_DICDI	GP63 (Peptidase M8 family protein)	5.5	O76495_DICDI	Gp63 homolog	5.5	Q4HFL2_CAMCO	Hypothetical protein	7.2
CONTIG3407	[AmC6]tccacgaggggtaacagtcataagtaagtaagttaattgcgatcaatgat	Q4QQE8_SCHMA	Endonuclease-reverse transcriptase	2.00E-10	Q5BSV8_SCHJA	SJCHGC03153 protein	3.00E-10	Q7PQP8_ANOGA	ENSANGP00000011703	1.8	Q8I465_PLAF7	Unconventional myosin pfm-b	6.7	Q4D1E7_TRYCR	Trans-sialidase, putative	8.7
CONTIG3698	[AmC6]tgaattcatggttaaaaactctacctcaacacggatcacgtttcacaaat	Q4QQE8_SCHMA	Endonuclease-reverse transcriptase	8.00E-05	Q4SC32_TETNG	Chromosome 14 SCAF14660, whole genome shotgun sequence. (Fragment)	0.009	Q4RWU7_TETNG	Chromosome 15 SCAF14981, whole genome shotgun sequence. (Fragment)	0.046	Q5BSV8_SCHJA	SJCHGC03153 protein	0.046	Q8BGK4_MOUSE	13 days embryo forelimb cDNA, RIKEN full-length enriched library, clone:5930417L	0.079
CONTIG7033	[AmC6]agggtaaaataaggtcaatcagagatacttatcaaggacagagaaggaaa	Q4QQE8_SCHMA	Endonuclease-reverse transcriptase	1.00E-50	Q5C0M3_SCHJA	SJCHGC02939 protein (Fragment)	2.00E-40	Q5C264_SCHJA	SJCHGC06886 protein (Fragment)	4.00E-11	Q5BSY8_SCHJA	SJCHGC03051 protein	1.00E-07	O96146_PLAF7	Hypothetical protein PFB0225c	0.006
CD085433	[AmC6]cgtgactagaaagtagcaaattctcttctgaatgtatgtttttctgtcta	Q4QQE8_SCHMA	Endonuclease-reverse transcriptase	6.00E-09	Q5BT19_SCHJA	SJCHGC02981 protein (Fragment)	2.00E-06	Q5DCR7_SCHJA	SJCHGC03163 protein	1.00E-05	Q5DFU9_SCHJA	SJCHGC02281 protein	4.00E-05	Q5C0M3_SCHJA	SJCHGC02939 protein (Fragment)	0.053
>CL634	[AmC6]tcgtatcagtccataaattcattagcagttgatgtatgccatattgttcg	Q4QQE8_SCHMA	Endonuclease-reverse transcriptase	1.00E-11	Q5C0M3_SCHJA	SJCHGC02939 protein (Fragment)	5.00E-05	Q5C264_SCHJA	SJCHGC06886 protein (Fragment)	0.002	Q5BSY8_SCHJA	SJCHGC03051 protein	0.048	O87306_BORBU	ElpB2 (ORF29/ElpB2)	0.9
CD178757	[AmC6]atttactctttgtgctctcccaaattcttaatggccctttttttctcttt	Q5DGM9_SCHJA	SJCHGC02902 protein	1.00E-06	Q8MWP8_SCHJA	Polyprotein (Fragment)	1.00E-05	Q8T5G5_SCHJA	Polyprotein	4.00E-05	Q8MWP9_SCHJA	Polyprotein (Fragment)	4.00E-05	Q3MJT3_SCHJA	SJCHGC05140 protein	5.00E-05
CD194497	[AmC6]gccattagacaagcagcaactgccaagatactacacatcctcttcagtaa	Q4QQE8_SCHMA	Endonuclease-reverse transcriptase	2.00E-58	Q5BST9_SCHJA	SJCHGC03271 protein (Fragment)	4.00E-28	Q5BRY6_SCHJA	SJCHGC07009 protein (Fragment)	2.00E-11	Q5DHV0_SCHJA	SJCHGC03719 protein	2.00E-08	Q5C3A3_SCHJA	SJCHGC09318 protein (Fragment)	6.00E-08
CONTIG13236	[AmC6]tatattctacacgggctctaagtatggcagataaaagaaggtatgtggaa	Q4QQF5_SCHMA	Gag-pol polyprotein	3.00E-75	Q4QQF4_SCHMA	Gag-pol polyprotein	3.00E-69	Q4QQF3_SCHMA	Gag-pol polyprotein	1.00E-68	Q4QQF7_SCHMA	Gag-pol polyprotein	2.00E-63	Q4QQF2_SCHMA	Gag-pol polyprotein	2.00E-63
CF503126	[AmC6]ttcagacgtcccacaatagtagtatttcttgaccttaaggcggcatttta	Q5C3A7_SCHJA	SJCHGC06937 protein (Fragment)	3.00E-20	Q8T5G5_SCHJA	Polyprotein	6.00E-19	Q8MWP9_SCHJA	Polyprotein (Fragment)	6.00E-19	Q5C3A3_SCHJA	SJCHGC09318 protein (Fragment)	1.00E-18	Q5C394_SCHJA	SJCHGC09145 protein (Fragment)	1.00E-17
CONTIG10685	[AmC6]gactattcatgataaccatgtctgcttccaattctcgatgcagtgtgttc	Q4QQE8_SCHMA	Endonuclease-reverse transcriptase	2.00E-06	Q5BSV8_SCHJA	SJCHGC03153 protein	5.00E-05	Q5BT15_SCHJA	SJCHGC02990 protein	0.11	Q5D9Z7_SCHJA	SJCHGC03074 protein	1.2	Q5BSB5_SCHJA	SJCHGC05180 protein	2.6
CONTIG10681	[AmC6]gacagactgctcgtatcttttttcagcctactactacatcaggtaacgtc	Q4QQE8_SCHMA	Endonuclease-reverse transcriptase	9.00E-19	Q5BT30_SCHJA	SJCHGC02932 protein (Fragment)	2.00E-09	Q5BT13_SCHJA	SJCHGC03000 protein (Fragment)	2.00E-04	Q5BQS2_SCHJA	SJCHGC09829 protein	2.00E-04	Q5DBA5_SCHJA	SJCHGC09144 protein	4.00E-04
CONTIG5876	[AmC6]gtggtactttgtagtttagtcccattgaaagagcttctaggtgaaccttg	Q4QQD7_SCHMA	Reverse transcriptase	2.00E-09	P79954_XENLA	BMP type II receptor	0.23	Q4Z2N9_PLABE	Hypothetical protein (Fragment)	0.31	Q6GGX3_STAAR	Very large surface anchored protein	0.68	Q8NWQ6_STAAW	Ebh protein	1.5
CONTIG10830	[AmC6]acacatttcttagttgagattatgagtcaattgaagctaaaccaccatgg	Q8T5G5_SCHJA	Polyprotein	3.00E-31	Q8MWP9_SCHJA	Polyprotein (Fragment)	3.00E-31	Q5DBA5_SCHJA	SJCHGC09144 protein	5.00E-20	Q5DGM9_SCHJA	SJCHGC02902 protein	1.00E-17	Q5BT13_SCHJA	SJCHGC03000 protein (Fragment)	3.00E-17
CD061105	[AmC6]gccatgctcttttttactcgtttgtttgcttccatatattcagaccataa	Q4QQE8_SCHMA	Endonuclease-reverse transcriptase	2.00E-07	Q5C0M3_SCHJA	SJCHGC02939 protein (Fragment)	0.01	Q5BST9_SCHJA	SJCHGC03271 protein (Fragment)	0.016	Q5BVT5_SCHJA	SJCHGC07766 protein (Fragment)	0.69	Q7M449_LEITA	Cryptogene protein G4	3.4
CONTIG11125	[AmC6]ataaggaggctatcagtgaacttattaatgacgagaacctgattatcaca	Q4QQD7_SCHMA	Reverse transcriptase	6.00E-31	Q7RTK8_SCHMA	Reverse transcriptase	2.00E-11	Q90Z50_FUGRU	Putative reverse transcriptase	3.00E-11	Q4SXU0_TETNG	Chromosome undetermined SCAF12330, whole genome shotgun sequence	2.00E-10	Q6S016_DROME	Reverse transcriptase	4.00E-06
CONTIG4765	[AmC6]gagattgaagcagatatgaaaaggatgaataacaactggagagaactgga	Q4QQE8_SCHMA	Endonuclease-reverse transcriptase	4.00E-77	Q5BT64_SCHJA	SJCHGC02633 protein (Fragment)	2.00E-18	Q5BSE4_SCHJA	SJCHGC04778 protein (Fragment)	2.00E-18	Q5BQS2_SCHJA	SJCHGC09829 protein	5.00E-17	Q8T5G5_SCHJA	Polyprotein	7.00E-15
CD085444	[AmC6]gtgaagatacactgtagtacaactgcctaccatacatacaaaggaaaagt	Q7RTK8_SCHMA	Reverse transcriptase	8.00E-18	Q4F8Q4_AEDAE	Reverse transcriptase (Fragment)	8.00E-05	Q6S016_DROME	Reverse transcriptase	0.003	Q6S015_DROME	Reverse transcriptase	0.003	Q95VB5_DROVI	Reverse transcriptase	0.003
CD167839	[AmC6]atccctcttttaatcaaccggaatcgctctttggcaataatttacaaaag	Q4QQE8_SCHMA	Endonuclease-reverse transcriptase	8.00E-10	Q5BSV8_SCHJA	SJCHGC03153 protein	4.00E-05	Q4WDI9_ASPFU	Leucyl-tRNA synthetase	0.83	Q7RXR4_NEUCR	Hypothetical protein	1.9	Q9RJK0_STRCO	Hypothetical protein SCO0388	3.2
CONTIG3877	[AmC6]tcattgttaaagttgtgcattatattcaggacttctagtctttttcccgt	Q4QQE8_SCHMA	Endonuclease-reverse transcriptase	3.00E-21	Q5D9Z7_SCHJA	SJCHGC03074 protein	2.00E-13	Q5BSV8_SCHJA	SJCHGC03153 protein	5.00E-13	Q4WXB3_ASPFU	Hypothetical protein	0.027	Q5J2V7_9CARY	Maturase K	2
CD062022	[AmC6]taagcagagttgcatgataaatatcagttgacctccattcacaacatacc	Q4QQE8_SCHMA	Endonuclease-reverse transcriptase	2.00E-20	Q30KW9_SCHMA	Reverse transcriptase SR3-right (Fragment)	4.00E-19	Q30KX0_SCHMA	Reverse transcriptase SR3-left (Fragment)	1.00E-18	Q5DEY9_SCHJA	SJCHGC02887 protein	2.00E-15	Q3KTE0_SCHJA	SJCHGC09723 protein	5.00E-09
CONTIG12369	[AmC6]ctgaagggtaaaggagaagaggtataacaaataacattgagctgggaact	Q4QQE8_SCHMA	Endonuclease-reverse transcriptase	8.00E-25	Q5BT30_SCHJA	SJCHGC02932 protein (Fragment)	0.005	Q5BQS2_SCHJA	SJCHGC09829 protein	0.015	Q5BS58_SCHJA	SJCHGC06058 protein	0.033
CONTIG1389	[AmC6]cagcattacaaaggttcactacaaccttacctagaaatactagaaaaccc	Q4QQE8_SCHMA	Endonuclease-reverse transcriptase	8.00E-14	Q5C264_SCHJA	SJCHGC06886 protein (Fragment)	8.00E-09	Q5BSY2_SCHJA	SJCHGC03063 protein	4.00E-06	Q5BSY8_SCHJA	SJCHGC03051 protein	0.001	Q3KTJ2_SCHJA	SJCHGC05508 protein (Fragment)	0.002
SMLC53F03	[AmC6]ataggacttctgttcattaacacatggatatccacaaccttgagattttg	Q30KW9_SCHMA	Reverse transcriptase SR3-right (Fragment)	2.00E-07	Q30KX0_SCHMA	Reverse transcriptase SR3-left (Fragment)	6.00E-07	Q4QQE8_SCHMA	Endonuclease-reverse transcriptase	3.00E-06	Q5BSE4_SCHJA	SJCHGC04778 protein (Fragment)	3.00E-04	Q3MJW0_SCHJA	SJCHGC03052 protein	0.019
CF501162	[AmC6]aagggtacttgttttactcgacttaatcctaaacagtaacaccaattgaa	Q5C387_SCHJA	SJCHGC03776 protein (Fragment)	1.00E-32	Q8T5G5_SCHJA	Polyprotein	1.00E-27	Q5C3C1_SCHJA	SJCHGC04023 protein (Fragment)	6.00E-27	Q8MWP9_SCHJA	Polyprotein (Fragment)	4.00E-25	O76213_SCHMA	Reverse transcriptase (Fragment)	5.00E-12
CONTIG12031	[AmC6]agacagaaagttccattaataacctaaacttcgacatacttgtgaacacg	Q8T5G5_SCHJA	Polyprotein	1.00E-22	Q8MWP9_SCHJA	Polyprotein (Fragment)	1.00E-22	Q5DBA5_SCHJA	SJCHGC09144 protein	2.00E-15	Q5BSC9_SCHJA	SJCHGC05010 protein (Fragment)	3.00E-13	Q8MWP8_SCHJA	Polyprotein (Fragment)	9.00E-06
CD095657	[AmC6]acgatttccttaatgtatgtcctatcaattgccaacgtgttttcctaatt	Q4QQE8_SCHMA	Endonuclease-reverse transcriptase	1.00E-19	Q5BSV8_SCHJA	SJCHGC03153 protein	5.00E-09	Q6LZJ3_METMP	Hypothetical protein	0.28	Q54NQ8_DICDI	Hypothetical protein	4	Q7UI56_RHOBA	Hypothetical protein	8.9
CD132681	[AmC6]atagatacaaggtagctttacttgcaaggatgtttgatatttctggcaca	Q4QQE8_SCHMA	Endonuclease-reverse transcriptase	7.00E-30	Q5BSV8_SCHJA	SJCHGC03153 protein	2.00E-06	Q6L4B3_SOLDE	Putative polyprotein	0.075	Q5TMF9_ANOGA	ENSANGP00000005174 (Fragment)	0.13	Q8IL30_PLAF7	Hypothetical protein	1.4
CF502072	[AmC6]agtcttccattgacctgaacatattactgactgaaatatgatctatcagg	Q4QQE8_SCHMA	Endonuclease-reverse transcriptase	3.00E-20	Q5C264_SCHJA	SJCHGC06886 protein (Fragment)	8.00E-18	Q5TRD1_ANOGA	ENSANGP00000028171 (Fragment)	2.00E-06	Q5TRM3_ANOGA	ENSANGP00000027774 (Fragment)	4.00E-06	Q4R2S8_TRANA	P97Bcnt (Fragment)	4.00E-05
CD091606	[AmC6]attgaagactctcactttgatattgatttccgaacagttgttttgagtcc	Q30KW9_SCHMA	Reverse transcriptase SR3-right (Fragment)	6.00E-16	Q4QQE8_SCHMA	Endonuclease-reverse transcriptase	5.00E-15	Q30KX0_SCHMA	Reverse transcriptase SR3-left (Fragment)	1.00E-14	Q5BT64_SCHJA	SJCHGC02633 protein (Fragment)	1.00E-14	Q5BSE4_SCHJA	SJCHGC04778 protein (Fragment)	6.00E-13
CD117910	[AmC6]cgccctgatttactgtgttttctcgccaaattattcgccgtatcttacag	Q4QQE8_SCHMA	Endonuclease-reverse transcriptase	3.00E-19	Q5C0M3_SCHJA	SJCHGC02939 protein (Fragment)	2.00E-13	Q5BSZ5_SCHJA	SJCHGC03034 protein	0.18	Q60VU8_CAEBR	Hypothetical protein CBG19388	1.2	Q9KK33_STRPN	Surface protein PspC	3.4
CONTIG12596	[AmC6]aaacaatagtaagcgttttaattgactgactcgcgacatcattaacgaaa	Q4QQE8_SCHMA	Endonuclease-reverse transcriptase	5.00E-18	Q5BQS2_SCHJA	SJCHGC09829 protein	4.00E-11	Q5BSE4_SCHJA	SJCHGC04778 protein (Fragment)	2.00E-09	Q5BT64_SCHJA	SJCHGC02633 protein (Fragment)	2.00E-08	Q5BQT0_SCHJA	SJCHGC09821 protein	6.00E-08
CONTIG6095	[AmC6]cgaaattaattgcagtagcacaaatacactgagtattcatctttttcaaa	Q4QQE8_SCHMA	Endonuclease-reverse transcriptase	1.00E-09	Q5BT19_SCHJA	SJCHGC02981 protein (Fragment)	3.00E-04	Q5DFU9_SCHJA	SJCHGC02281 protein	0.003	Q3KTJ2_SCHJA	SJCHGC05508 protein (Fragment)	0.009	Q5C5W5_SCHJA	SJCHGC02282 protein (Fragment)	0.057
CD132327	[AmC6]ataccaaagaaagatctcagcaagtgcgaaaaaaacagaggaatcatact	Q5DEY9_SCHJA	SJCHGC02887 protein	1.00E-22	Q4QQE8_SCHMA	Endonuclease-reverse transcriptase	4.00E-19	Q5BRY6_SCHJA	SJCHGC07009 protein (Fragment)	6.00E-16	Q30KX0_SCHMA	Reverse transcriptase SR3-left (Fragment)	5.00E-12	Q30KW9_SCHMA	Reverse transcriptase SR3-right (Fragment)	5.00E-12
CONTIG7048	[AmC6]tggaagttcagttcagttactttgttgaaatttatcgagggagtttctca	Q4QQE8_SCHMA	Endonuclease-reverse transcriptase	5.00E-22	Q5BSV8_SCHJA	SJCHGC03153 protein	4.00E-08	Q5BT64_SCHJA	SJCHGC02633 protein (Fragment)	2.00E-06	Q5BQS2_SCHJA	SJCHGC09829 protein	2.00E-05	Q5BSE4_SCHJA	SJCHGC04778 protein (Fragment)	3.00E-04
CD094437	[AmC6]tcctacagtggctatttctgtccaactagtatcaggtgcattaaaatttc	Q4QQE2_SCHMA	Endonuclease-reverse transcriptase	3.00E-15	Q4QQE9_SCHMA	Endonuclease-reverse transcriptase	8.00E-05	Q4QQE4_SCHMA	Endonuclease-reverse transcriptase	0.001	Q08525_CHICK	Hypothetical protein	4.5
CONTIG12968	[AmC6]atttctgctaaacgagtttccctttccaatacgagattcacattgtcttt	Q4QQE9_SCHMA	Endonuclease-reverse transcriptase	1.00E-38	Q86FE1_SCHJA	Clone ZZD1497 mRNA sequence	1.00E-30	Q4QQE2_SCHMA	Endonuclease-reverse transcriptase	4.00E-18	Q5EFG1_9SCOR	Reverse transcriptase (Fragment)	1.00E-14	O18520_SCHMA	Pol (Fragment)	1.00E-14
CD149639	[AmC6]ttggcagtgtagctgagaatcttttccaacattttaacattgataccaaa	Q4QQE2_SCHMA	Endonuclease-reverse transcriptase	5.00E-17	Q4QQE4_SCHMA	Endonuclease-reverse transcriptase	2.00E-07	Q4QQE9_SCHMA	Endonuclease-reverse transcriptase	9.00E-06	Q55CS5_DICDI	Hypothetical protein	9.2	P91243_CAEEL	Dnaj domain (Prokaryotic heat shock protein) protein 9	9.2
CONTIG10887	[AmC6]atttcctttcaaccaaacagtctagaaaaggtaagtttgtgttcaggaga	Q5C0X6_SCHJA	SJCHGC02960 protein (Fragment)	1.00E-13	Q90Z50_FUGRU	Putative reverse transcriptase	7.00E-13	Q7RTK8_SCHMA	Reverse transcriptase	4.00E-12	Q4F8Q4_AEDAE	Reverse transcriptase (Fragment)	1.00E-08	Q5BX83_SCHJA	SJCHGC03156 protein (Fragment)	1.00E-05
CD152740	[AmC6]ctgtgtggtcattcttgcaaaacaacctctgataaagaaagaagaaaatc	Q7RTK8_SCHMA	Reverse transcriptase	5.00E-06	Q6VXF5_ENTFC	Putative enterococcal surface protein (Fragment)	1.5	Q577M1_BRUAB	Hypothetical membrane protein (Hypothetical protein)	5.8	Q8YBT0_BRUME	PUTATIVE TRANSMEMBRANE PROTEIN	5.8	Q8FWJ3_BRUSU	Membrane protein, putative	5.8
CF495603	[AmC6]ttatatatccaaccttttacatccaaactagcatcatgaaggcaccaaaa	Q8T5G5_SCHJA	Polyprotein	8.00E-05	Q8MWP9_SCHJA	Polyprotein (Fragment)	8.00E-05	Q5DBA5_SCHJA	SJCHGC09144 protein	0.004	Q5BTL3_SCHJA	Reverse transcriptase	0.022	Q86801_TAV	Capsid protein protein	2.6
CONTIG10909	[AmC6]aatcttgaattgtccaccttgattacctccgtcgtttgtgaagttacgtc	Q4QQE8_SCHMA	Endonuclease-reverse transcriptase	1.00E-68	Q5DEY9_SCHJA	SJCHGC02887 protein	8.00E-58	Q30KX0_SCHMA	Reverse transcriptase SR3-left (Fragment)	1.00E-55	Q30KW9_SCHMA	Reverse transcriptase SR3-right (Fragment)	3.00E-55	Q3KTE0_SCHJA	SJCHGC09723 protein	3.00E-19
CONTIG10995	[AmC6]tagataaggacacgtcttgcatacagatggatttgatttatattctcgat	Q8RBH2_THETN	Transposase	2.00E-39	Q8RCM3_THETN	Transposase	4.00E-39	Q8RCC1_THETN	Transposase	4.00E-39	Q8RBF5_THETN	Transposase	4.00E-39	Q8RA51_THETN	Transposase	4.00E-39
CD062747	[AmC6]tgtctctgtgtgttatcgtttattacagtatctggggctaatgtttctaa	Q4QQE8_SCHMA	Endonuclease-reverse transcriptase	1.00E-08	Q5D9Z7_SCHJA	SJCHGC03074 protein	1.5	Q805Q1_HCMV	RL5A	5.8	Q4Y7Q5_PLACH	Hypothetical protein (Fragment)	5.8	Q5BSV8_SCHJA	SJCHGC03153 protein	5.8
>CL313	[AmC6]tagtttttgtatagcattcgtattcttcgtgttttatgcctttttccacg	Q4QQF6_SCHMA	Gag-pol polyprotein (Fragment)	7.00E-19	Q4QQF7_SCHMA	Gag-pol polyprotein	4.00E-11	Q5C201_SCHJA	SJCHGC05312 protein (Fragment)	5.00E-09	Q4QQF5_SCHMA	Gag-pol polyprotein	4.00E-08	Q5TRA9_ANOGA	ENSANGP00000014227	2.00E-06
>CL982	[AmC6]ctgtagatggcatttcacccattctctataactatgattgatctcatgtt	Q6IFU2_SCHMA	Pol polyprotein	3.00E-12	Q4QQE6_SCHMA	Endonuclease-reverse transcriptase	4.00E-05	Q4JIV5_9SCOR	Reverse transcriptase (Fragment)	1.1	Q8F0X0_LEPIN	Glucans biosynthesis protein mdoC	7.4	Q72U70_LEPIC	Hypothetical protein	7.4
SMLC54G08	[AmC6]gaatctggtttgttgtctcccacagtaacttgttgctgaattatcgaaat	Q4QQE8_SCHMA	Endonuclease-reverse transcriptase	6.00E-32	Q5BSV8_SCHJA	SJCHGC03153 protein	3.00E-05	Q6L4B3_SOLDE	Putative polyprotein	0.027	Q5TMF9_ANOGA	ENSANGP00000005174 (Fragment)	0.036	Q710I1_9MAGN	Putative MADS600 protein (Fragment)	9.8
CF499612	[AmC6]ggttatagctttccaaagggtactgttcagtttctctatttgaccatttc	Q8MTP7_BIOGL	Reverse transcriptase-like protein 75 (Fragment)	2.00E-32	P91581_CIOIN	COS41.3	8.00E-32	Q69ZA7_MOUSE	MKIAA1769 protein (Fragment)	0.53	O04013_VOLCA	Reverse transcriptase, gag, polyprotein	0.91	Q5TVX8_ANOGA	ENSANGP00000026105 (Fragment)	0.91
CONTIG8929	[AmC6]acaacggatattgagtatctcacgtagacaatggtttagaaatacttgtg	Q4QQE8_SCHMA	Endonuclease-reverse transcriptase	7.00E-29	Q30KX0_SCHMA	Reverse transcriptase SR3-left (Fragment)	3.00E-10	Q30KW9_SCHMA	Reverse transcriptase SR3-right (Fragment)	8.00E-09	Q5BT30_SCHJA	SJCHGC02932 protein (Fragment)	4.00E-07	Q5BSV8_SCHJA	SJCHGC03153 protein	5.00E-07
SMU66335	[AmC6]ACTAACCTAAGAGGTAACACCCAGAAATTGGAGACCCTATATAGCAGAAC		SCHISTOSOMA MANSONI SR1 NON-LTR RETROTRANSPOSON, INTERNAL FRAGMENT H1, POL PSEUD	OM0023337-AOP
CD171047	[AmC6]catcctactttaagtctgcgaaggatggccattatgagtagaggatattt	Q8T5G5_SCHJA	Polyprotein	8.00E-13	Q8MWP9_SCHJA	Polyprotein (Fragment)	8.00E-13	Q5DBA5_SCHJA	SJCHGC09144 protein	2.00E-12	Q3MJS9_SCHJA	SJCHGC06446 protein (Fragment)	7.00E-06	Q5BSC9_SCHJA	SJCHGC05010 protein (Fragment)	0.18
CONTIG8196	[AmC6]gagcagagaacgtacaaggcaaatacacagaagcaaataggtatttaatt	Q4QQE8_SCHMA	Endonuclease-reverse transcriptase	3.00E-25	Q5C0M3_SCHJA	SJCHGC02939 protein (Fragment)	4.00E-24	Q5C264_SCHJA	SJCHGC06886 protein (Fragment)	4.00E-09	Q5BSY2_SCHJA	SJCHGC03063 protein	3.00E-04	Q5BSY8_SCHJA	SJCHGC03051 protein	0.002
CD093874	[AmC6]tgctacactgatgtcttgacctacatatgattgtatgtaagggatataag	Q30KX0_SCHMA	Reverse transcriptase SR3-left (Fragment)	4.00E-22	Q30KW9_SCHMA	Reverse transcriptase SR3-right (Fragment)	9.00E-22	Q4QQE8_SCHMA	Endonuclease-reverse transcriptase	1.00E-21	Q5D952_SCHJA	SJCHGC04954 protein	2.00E-09	Q5BSE4_SCHJA	SJCHGC04778 protein (Fragment)	5.00E-09
CD166893	[AmC6]tgccgggtttcccacatagttctgcttgtcgactataatgcttctcttca	Q4QQE8_SCHMA	Endonuclease-reverse transcriptase	2.00E-06	Q5C0M3_SCHJA	SJCHGC02939 protein (Fragment)	3.00E-05
CD117558	[AmC6]tatgaagggactactattacgatgcacttgtaatgcacaaactacattca	Q4QQD7_SCHMA	Reverse transcriptase	1.00E-17	Q4SXU0_TETNG	Chromosome undetermined SCAF12330, whole genome shotgun sequence	0.002	Q90Z50_FUGRU	Putative reverse transcriptase	0.34	Q7RTK8_SCHMA	Reverse transcriptase	3.7	CDC27_YEAST	Anaphase promoting complex subunit CDC27 (Cell division control protein 27) (Ana	4.9
CD202013	[AmC6]tattcatccttttcatatctgcctctatttcccggcgtaatatgttcttt	Q4QQE8_SCHMA	Endonuclease-reverse transcriptase	6.00E-08	Q5BSV8_SCHJA	SJCHGC03153 protein	1.00E-07	Q4YQ19_PLABE	Hypothetical protein	0.31	Q7RDF3_PLAYO	Hypothetical protein	5.8	Q7RA78_PLAYO	IQ calmodulin-binding motif, putative (Fragment)	5.8
CONTIG11905	[AmC6]ttttagcatcaggcctgaagacaattctaaacaagcggattacacattct	Q5BSA3_SCHJA	SJCHGC05284 protein	1.00E-09	Q8MWP8_SCHJA	Polyprotein (Fragment)	2.00E-09	Q8T5G5_SCHJA	Polyprotein	6.00E-09	Q3MJT3_SCHJA	SJCHGC05140 protein	6.00E-09	Q8MWP9_SCHJA	Polyprotein (Fragment)	6.00E-09
CD094441	[AmC6]cgggttgaaatacattaaacgccttctaaaaattatccgagacaagaagt	Q4QQE2_SCHMA	Endonuclease-reverse transcriptase	3.00E-05	C82A1_PEA	Cytochrome P450 82A1 (EC 1.14.-.-) (CYPLXXXII) (Fragment)	5.5
CD163844	[AmC6]ctctgtcattccttgtcttcatttctgctctagaacccttttgtttatca	Q5DEY9_SCHJA	SJCHGC02887 protein	1.00E-09	Q4QQE8_SCHMA	Endonuclease-reverse transcriptase	2.00E-09	Q30KX0_SCHMA	Reverse transcriptase SR3-left (Fragment)	3.00E-09	Q30KW9_SCHMA	Reverse transcriptase SR3-right (Fragment)	3.00E-09	Q5BSE4_SCHJA	SJCHGC04778 protein (Fragment)	2.00E-06
CF500921	[AmC6]gatttggatttcatagatgacctagtccttctaccaatacacaccaacaa	Q4QQE8_SCHMA	Endonuclease-reverse transcriptase	9.00E-17	Q30KW9_SCHMA	Reverse transcriptase SR3-right (Fragment)	1.00E-15	Q5DEY9_SCHJA	SJCHGC02887 protein	2.00E-15	Q30KX0_SCHMA	Reverse transcriptase SR3-left (Fragment)	6.00E-15	Q3KTE0_SCHJA	SJCHGC09723 protein	1.00E-10
>CL1090	[AmC6]aagtgcagtttccctaagtagaattagaagtgtatttagatcaatcagtt	Q4QQE8_SCHMA	Endonuclease-reverse transcriptase	7.00E-31	Q5C264_SCHJA	SJCHGC06886 protein (Fragment)	4.00E-17	Q5C0M3_SCHJA	SJCHGC02939 protein (Fragment)	1.00E-16	Q5BSY8_SCHJA	SJCHGC03051 protein	3.00E-09	Q5BSY2_SCHJA	SJCHGC03063 protein	2.00E-04
CONTIG3453	[AmC6]ttgctgttgttgtagtattcggctgagctggtcatctgatataggcattt	Q5C209_SCHJA	SJCHGC03089 protein (Fragment)	4.00E-42	Q5C287_SCHJA	SJCHGC03048 protein (Fragment)	1.00E-26	Q4QQF6_SCHMA	Gag-pol polyprotein (Fragment)	9.00E-19	Q5C295_SCHJA	SJCHGC02649 protein (Fragment)	4.00E-18	Q4QQF5_SCHMA	Gag-pol polyprotein	4.00E-17
CONTIG11198	[AmC6]aattcgaatccgaaccatttaataacttggctaaacttctaggctccaat	Q4QQD4_SCHMA	Pol polyprotein	8.00E-47	Q5C1P1_SCHJA	SJCHGC05322 protein (Fragment)	6.00E-42	Q6IFU3_SCHMA	Pol polyprotein (Fragment)	8.00E-29	Q68NI0_SCHMA	Polyprotein (Fragment)	8.00E-29	Q6IFT8_SCHMA	Pol polyprotein	1.00E-28
CD096910	[AmC6]aaaacaagacaggtgtgactaaaaaaacagtatctacaagtctcaccttc	Q4QQD7_SCHMA	Reverse transcriptase	5.00E-17	Q4SXU0_TETNG	Chromosome undetermined SCAF12330, whole genome shotgun sequence	0.005	Q4KTA7_FUGRU	Telomerase reverse transcriptase	0.014	Q90Z50_FUGRU	Putative reverse transcriptase	0.054	Q8VVS1_STAAU	ORF24	0.12
CD068500	[AmC6]attatactgtgcaatacggaccatcattgtgcagaaacgaattgaataaa	Q4QQE8_SCHMA	Endonuclease-reverse transcriptase	2.00E-12	Q30KX0_SCHMA	Reverse transcriptase SR3-left (Fragment)	3.00E-12	Q30KW9_SCHMA	Reverse transcriptase SR3-right (Fragment)	9.00E-12	Q5DEY9_SCHJA	SJCHGC02887 protein	0.003	Q5BT18_SCHJA	SJCHGC02983 protein	0.012
CD195288	[AmC6]agaaaatcaggtttaaacatacggtcttctagtcctttgagtagaccgaa	Q4QQD7_SCHMA	Reverse transcriptase	3.00E-07	Q5DZC4_VIBF1	Chemotaxis protein CheV (EC 2.7.3.-)	2.5	Q5ZQE9_9COLE	Cytochrome oxidase subunit III (Fragment)	5.5	Q6FVU3_CANGA	Candida glabrata strain CBS138 chromosome D complete sequence	7.2
CD066558	[AmC6]tttacatgtctgtctctatttctcggcgtaatgtgttcttaggtcttcct	Q4QQE8_SCHMA	Endonuclease-reverse transcriptase	4.00E-26	Q5BSV8_SCHJA	SJCHGC03153 protein	1.00E-09	Q86DF1_HETGL	Putative gland protein G23G11	2.4
CD186839	[AmC6]accctgagtagcattcaggaaaagaataaagagaagatgacaatcagcat	Q4QQE8_SCHMA	Endonuclease-reverse transcriptase	1.00E-29	Q5C0M3_SCHJA	SJCHGC02939 protein (Fragment)	2.00E-26	Q8IE65_PLAF7	Hypothetical malaria antigen	0.009	Q4CZB3_TRYCR	Hypothetical protein	0.012	Q9ZN10_HELPJ	Putative	0.016
CF499420	[AmC6]cttatagtggtcagaagactctgcattttgtcagcgtcttcaccaaataa	Q8T5G5_SCHJA	Polyprotein	6.00E-43	Q8MWP9_SCHJA	Polyprotein (Fragment)	6.00E-43	Q5DBA5_SCHJA	SJCHGC09144 protein	1.00E-32	Q3KZB4_SCHJA	SJCHGC02980 protein (Fragment)	7.00E-28	Q5C3A3_SCHJA	SJCHGC09318 protein (Fragment)	1.00E-18
Contig5706	[AmC6]GATCACGAAAGTTAATAGACGGAAACACTAAGTTATCCGTTTGCGTAATT		SIMILAR TO PROTEASE AND REVERSE TRANSCRIPTASE-LIKE PROTEIN (2E-09)	OM0023349-AOP
CD091443	[AmC6]atggtcaggagcattagatctgaaatatactgaaacacgtggaagacgta	Q4QQE8_SCHMA	Endonuclease-reverse transcriptase	5.00E-17	Q5C0M3_SCHJA	SJCHGC02939 protein (Fragment)	2.00E-16	Q5BST9_SCHJA	SJCHGC03271 protein (Fragment)	1.00E-07	Q5BSZ5_SCHJA	SJCHGC03034 protein	0.14	Q4IEM1_GIBZE	Hypothetical protein	0.68
